# Supplementary material for: Diversity oriented and chemoenzymatic synthesis of densely functionalized pyrrolidines through a highly diastereoselective Ugi multicomponent reaction
Source: Royal Society of Chemistry journal article supplement (doi:10.1039/c1ob06632c), 2011-11-03

# **Diversity oriented and chemoenzymatic synthesis of densely functionalized pyrrolidines through a highly diastereoselective Ugi multicomponent reaction**

Valentina Cerulli, Luca Banfi, Andrea Basso, Valeria Rocca, Renata Riva

## **Supporting Information**

### **$^1\text{H}$ AND $^{13}\text{C}$ NMR SPECTRA OF NEW COMPOUNDS (PART I)**

<sup>1</sup>H NMR of compound 2

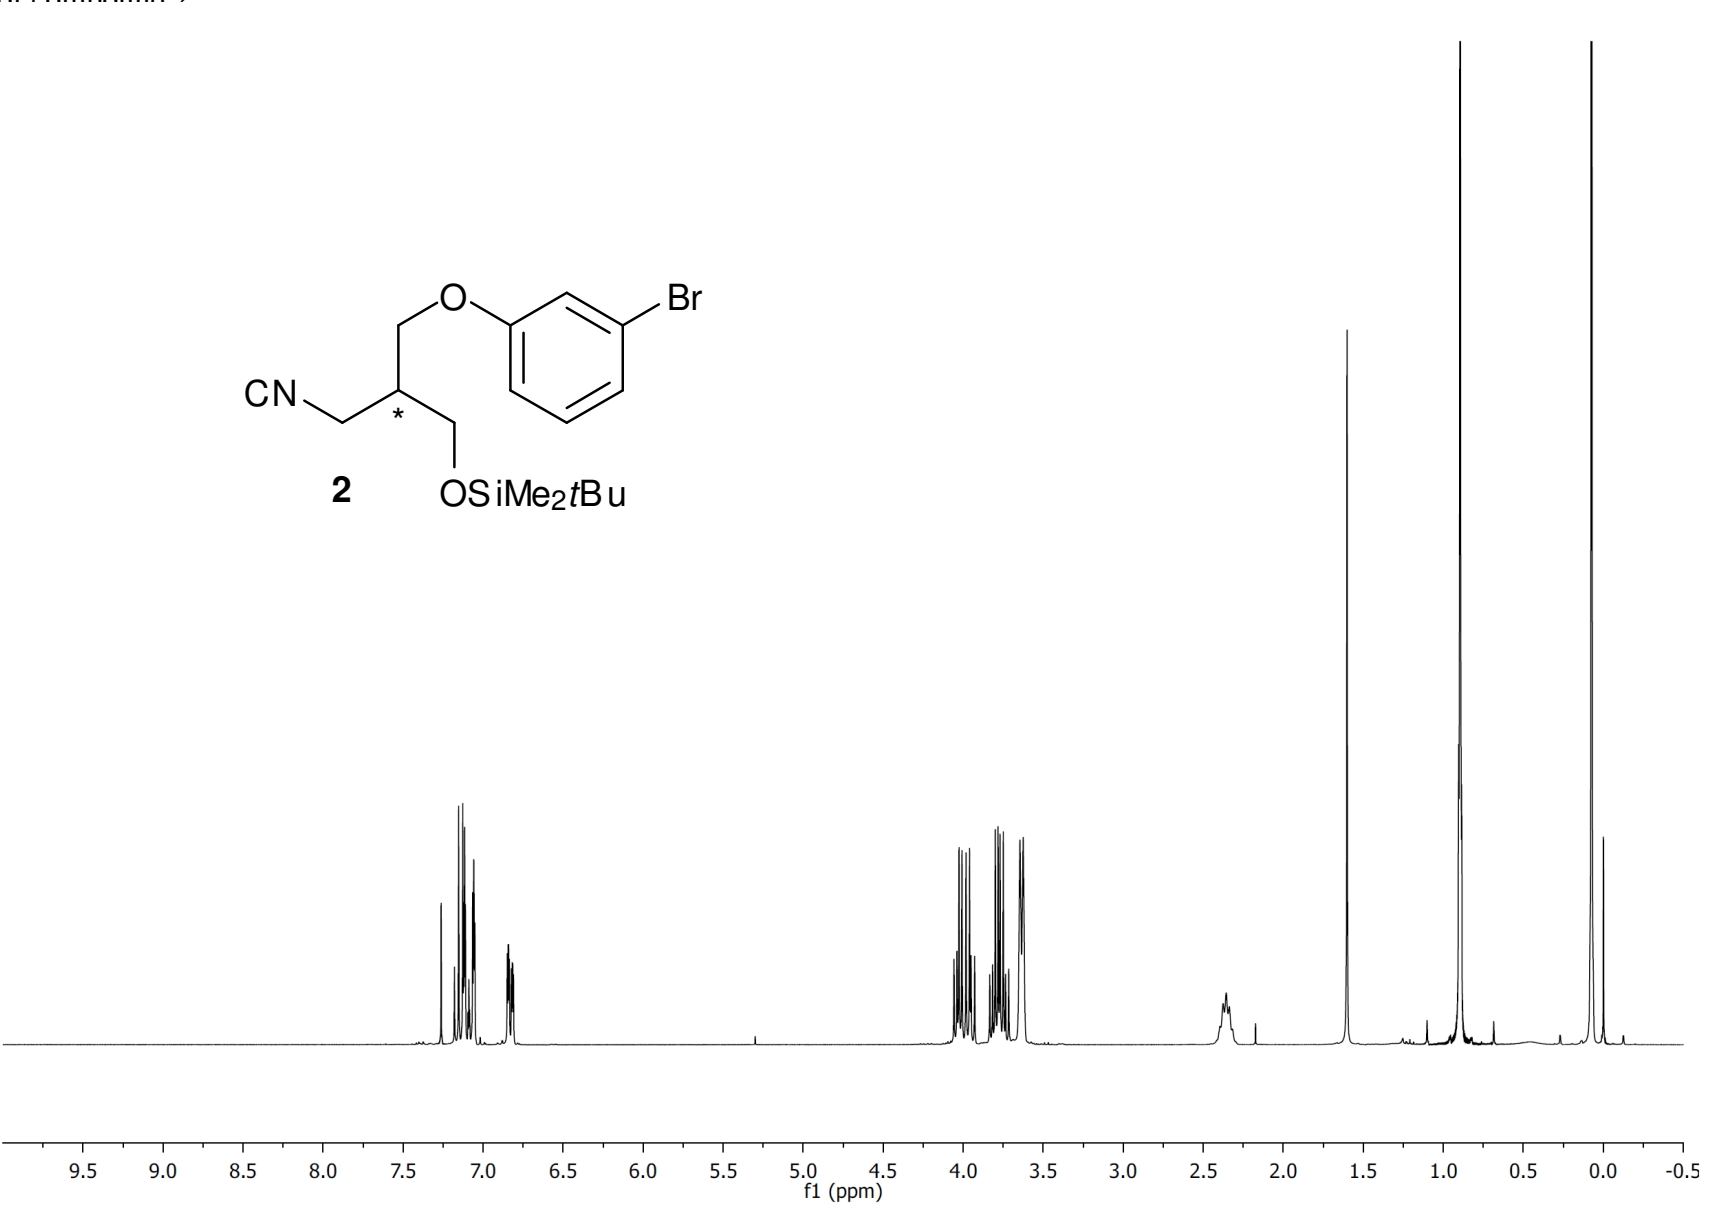

<sup>13</sup>C NMR of compound 2

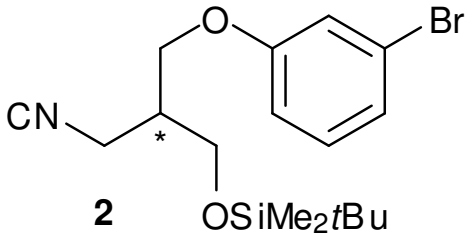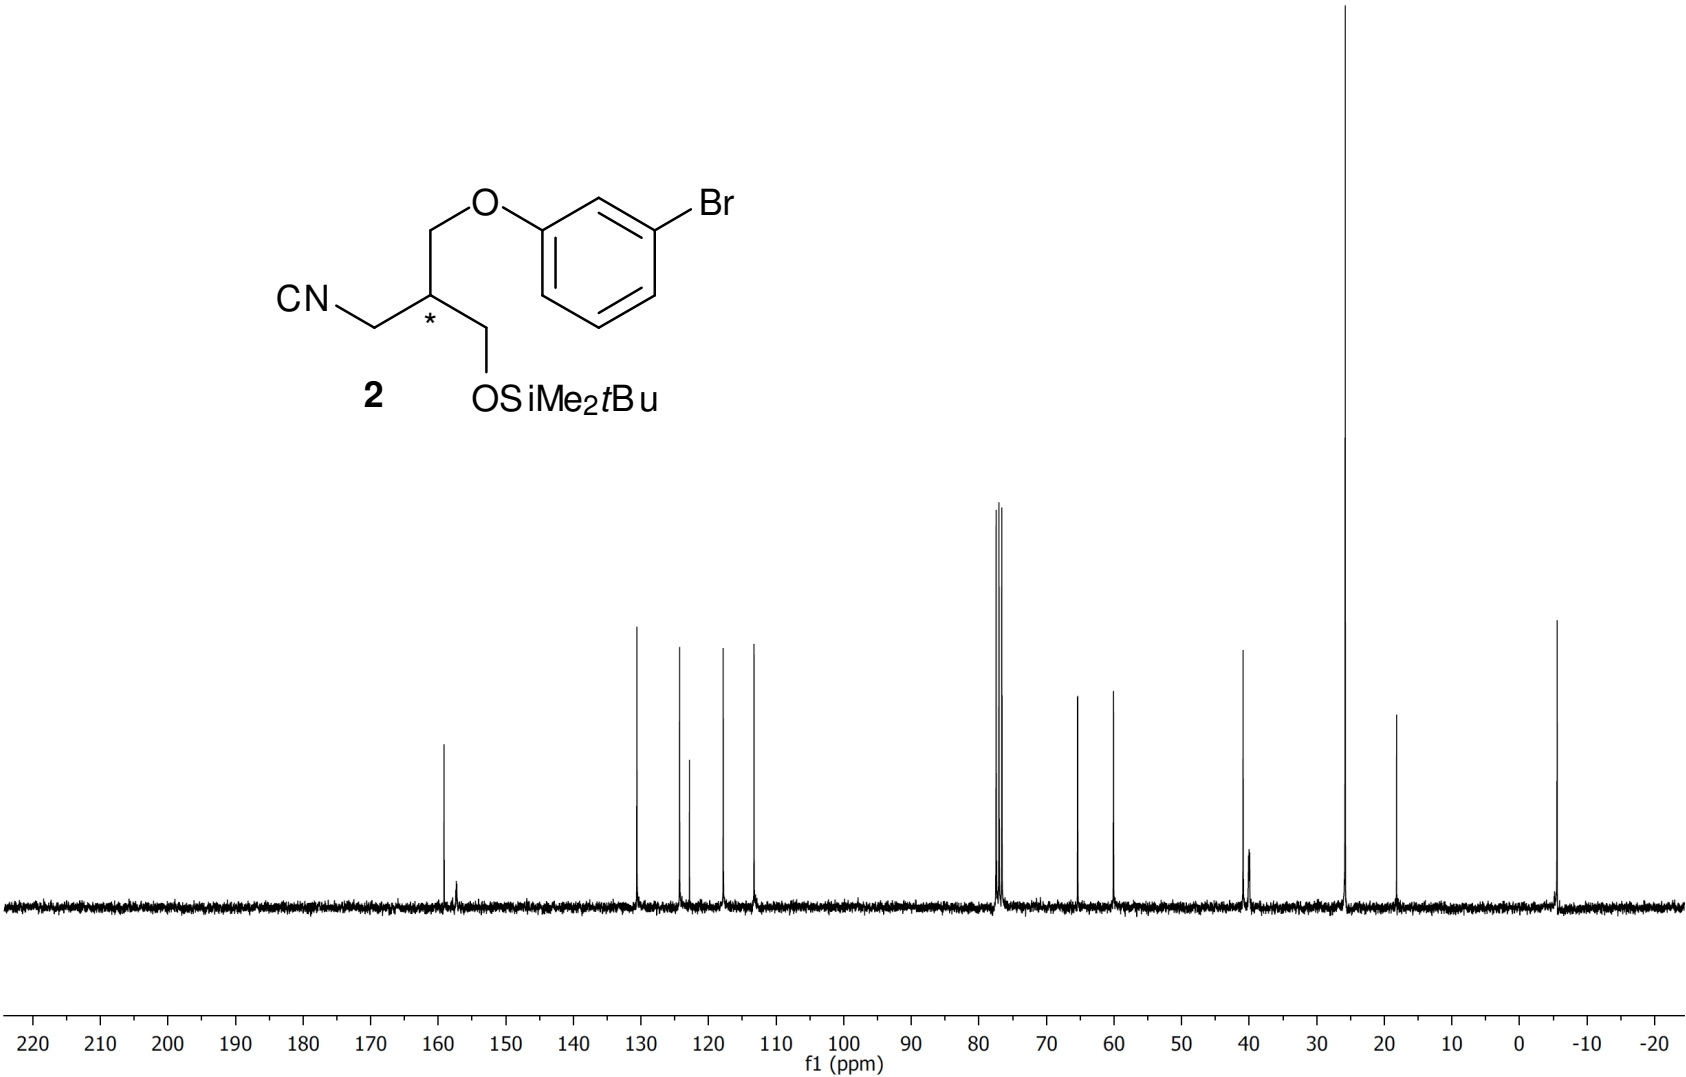

<sup>1</sup>H NMR of compound **3**

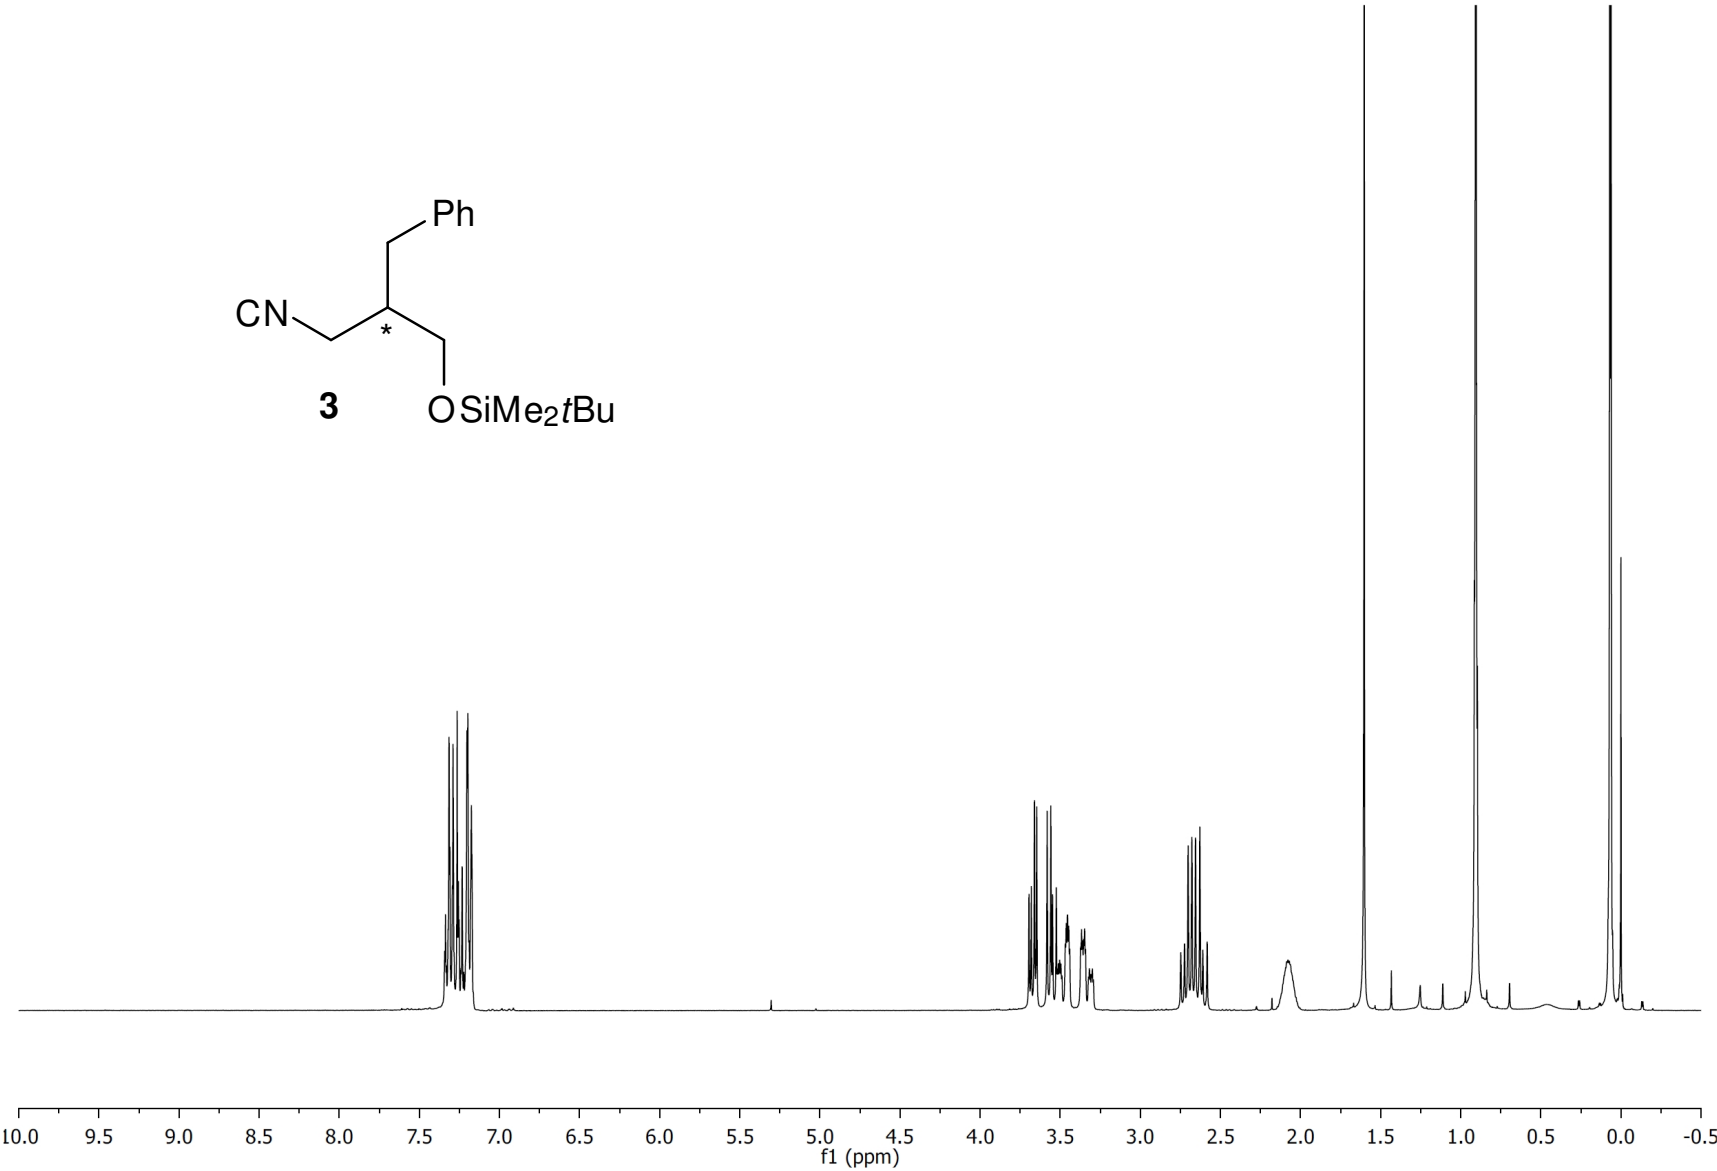

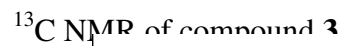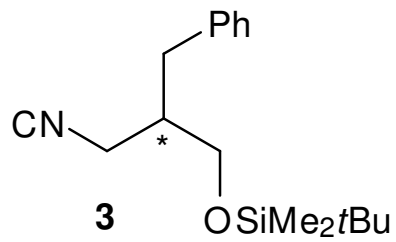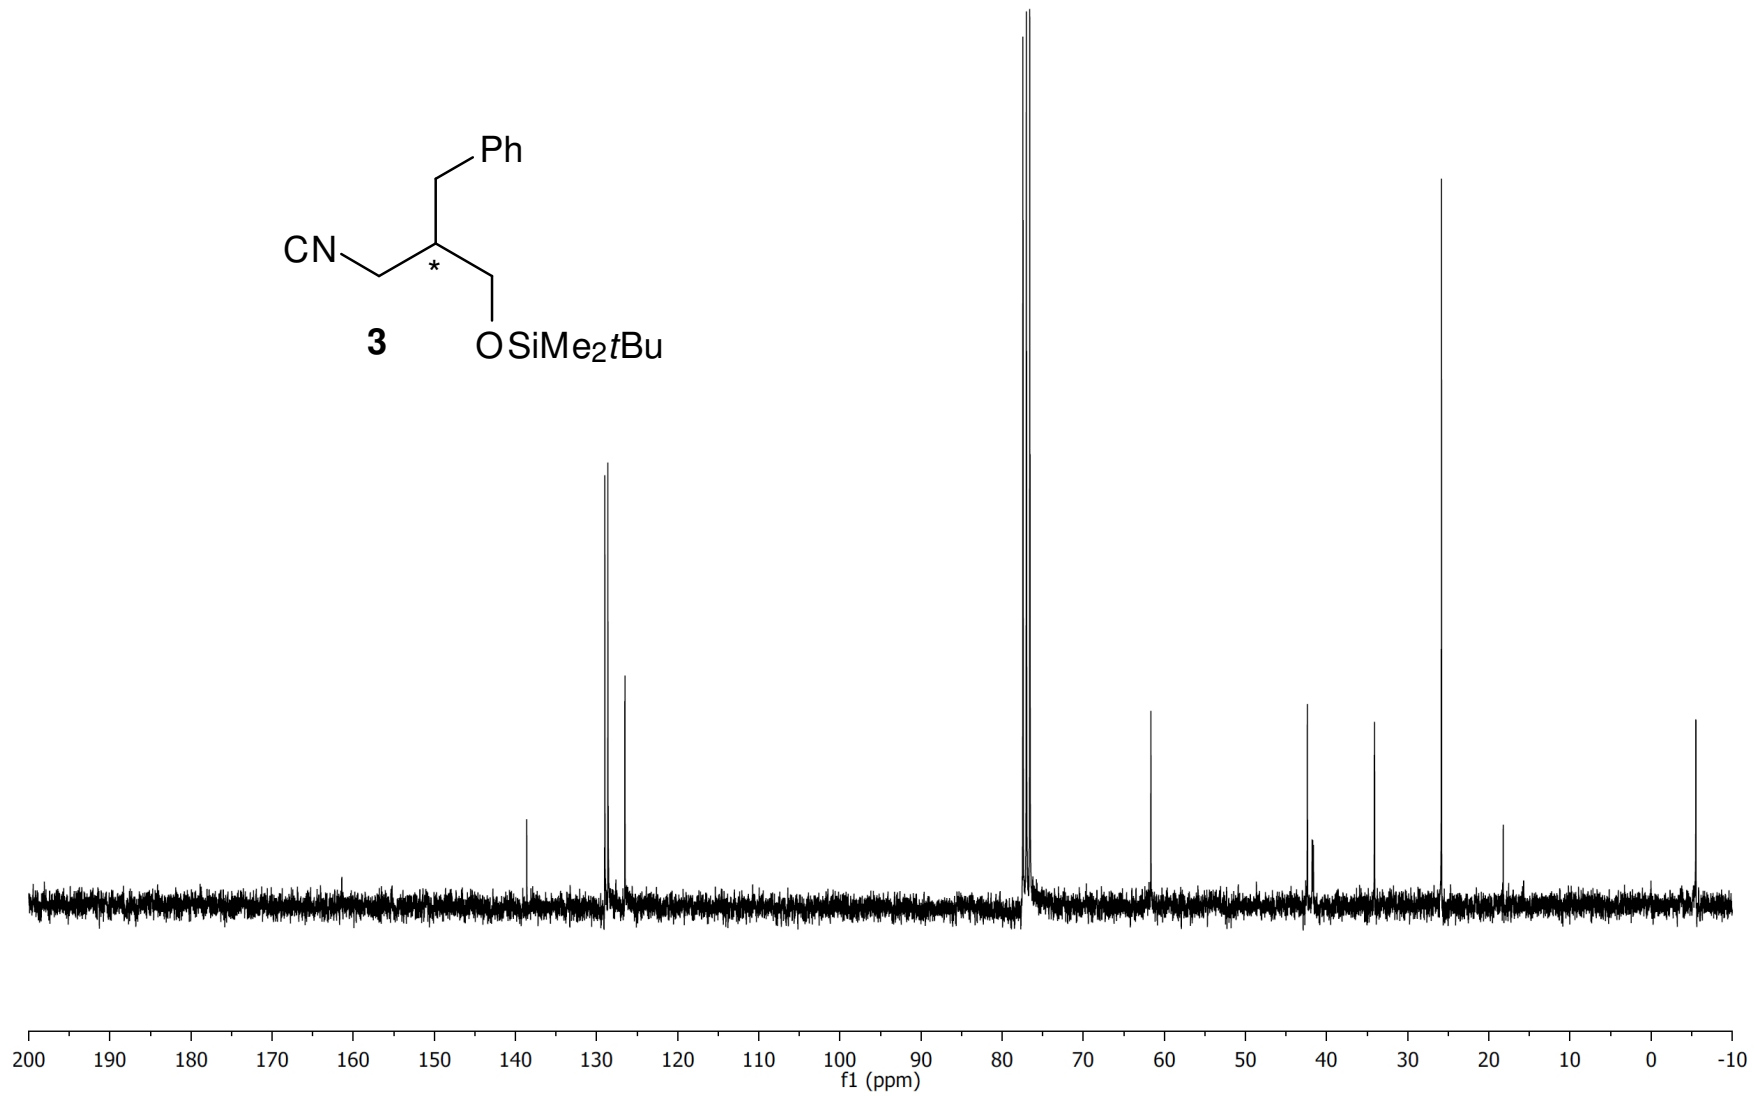

<sup>1</sup>H NMR of compound **11**

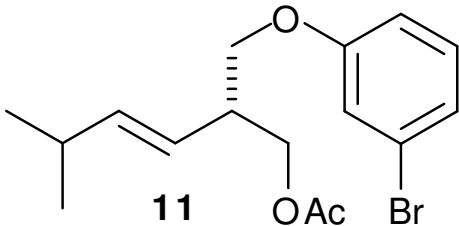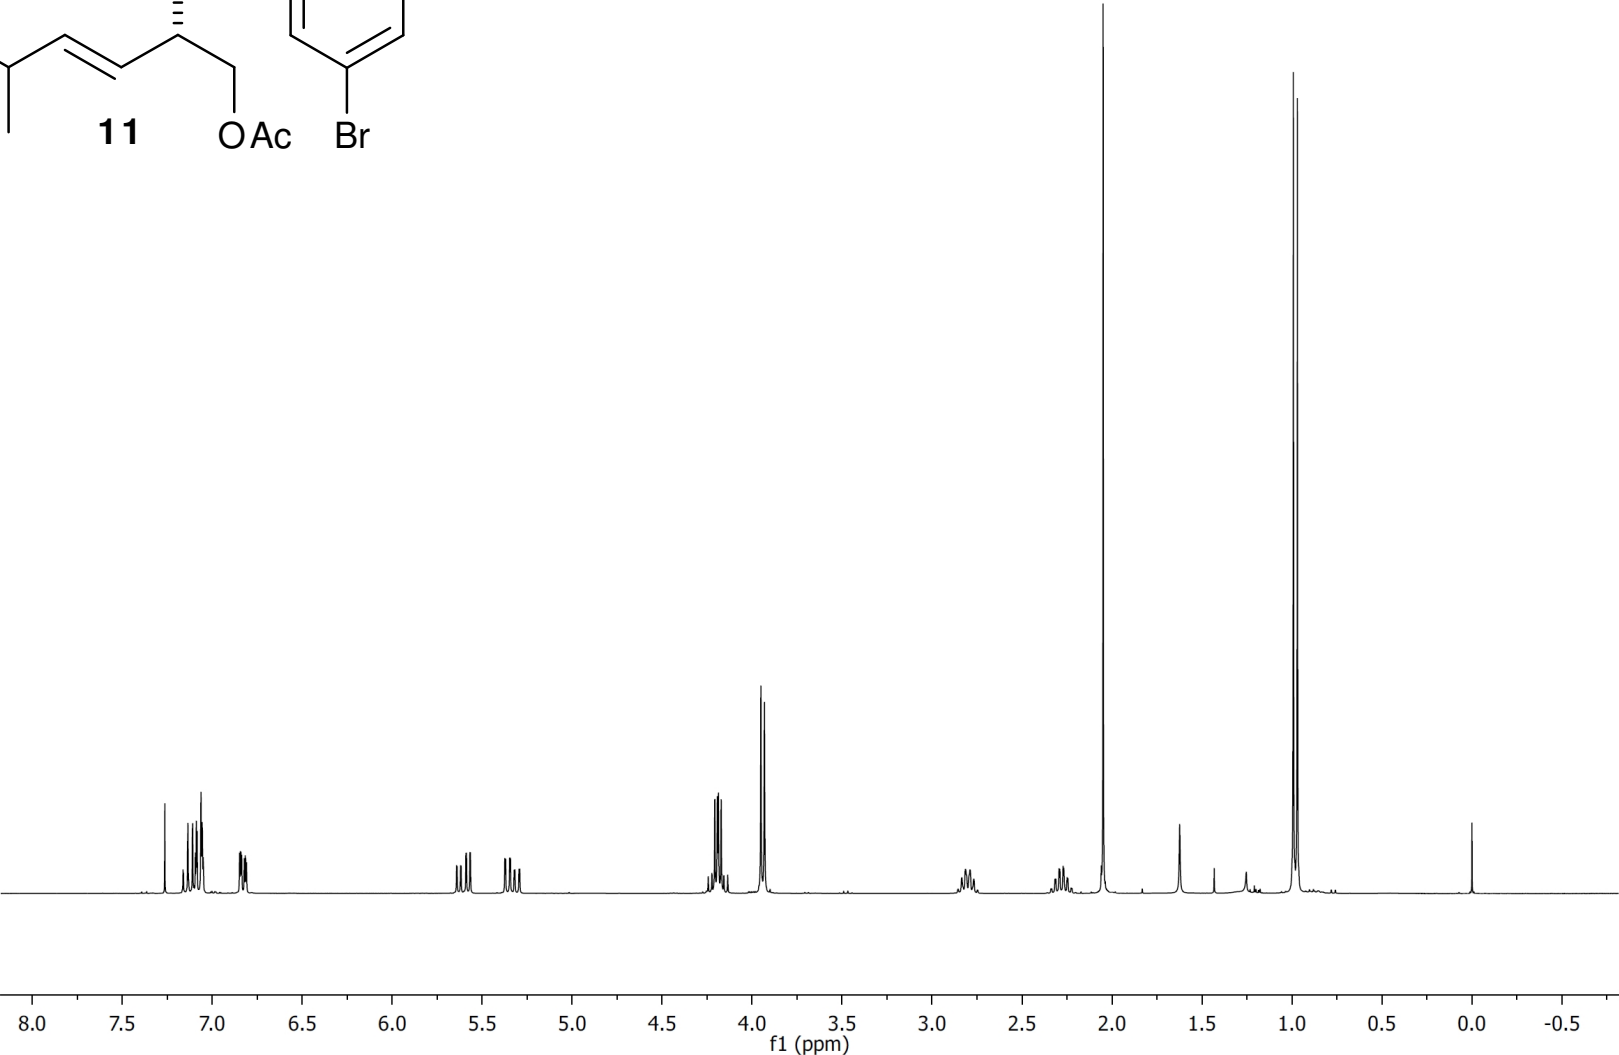

<sup>13</sup>C NMR of compound **11**

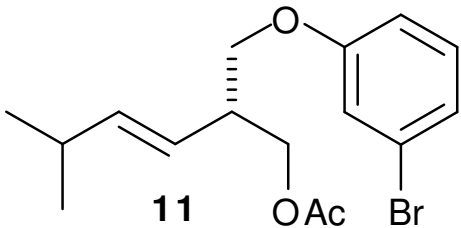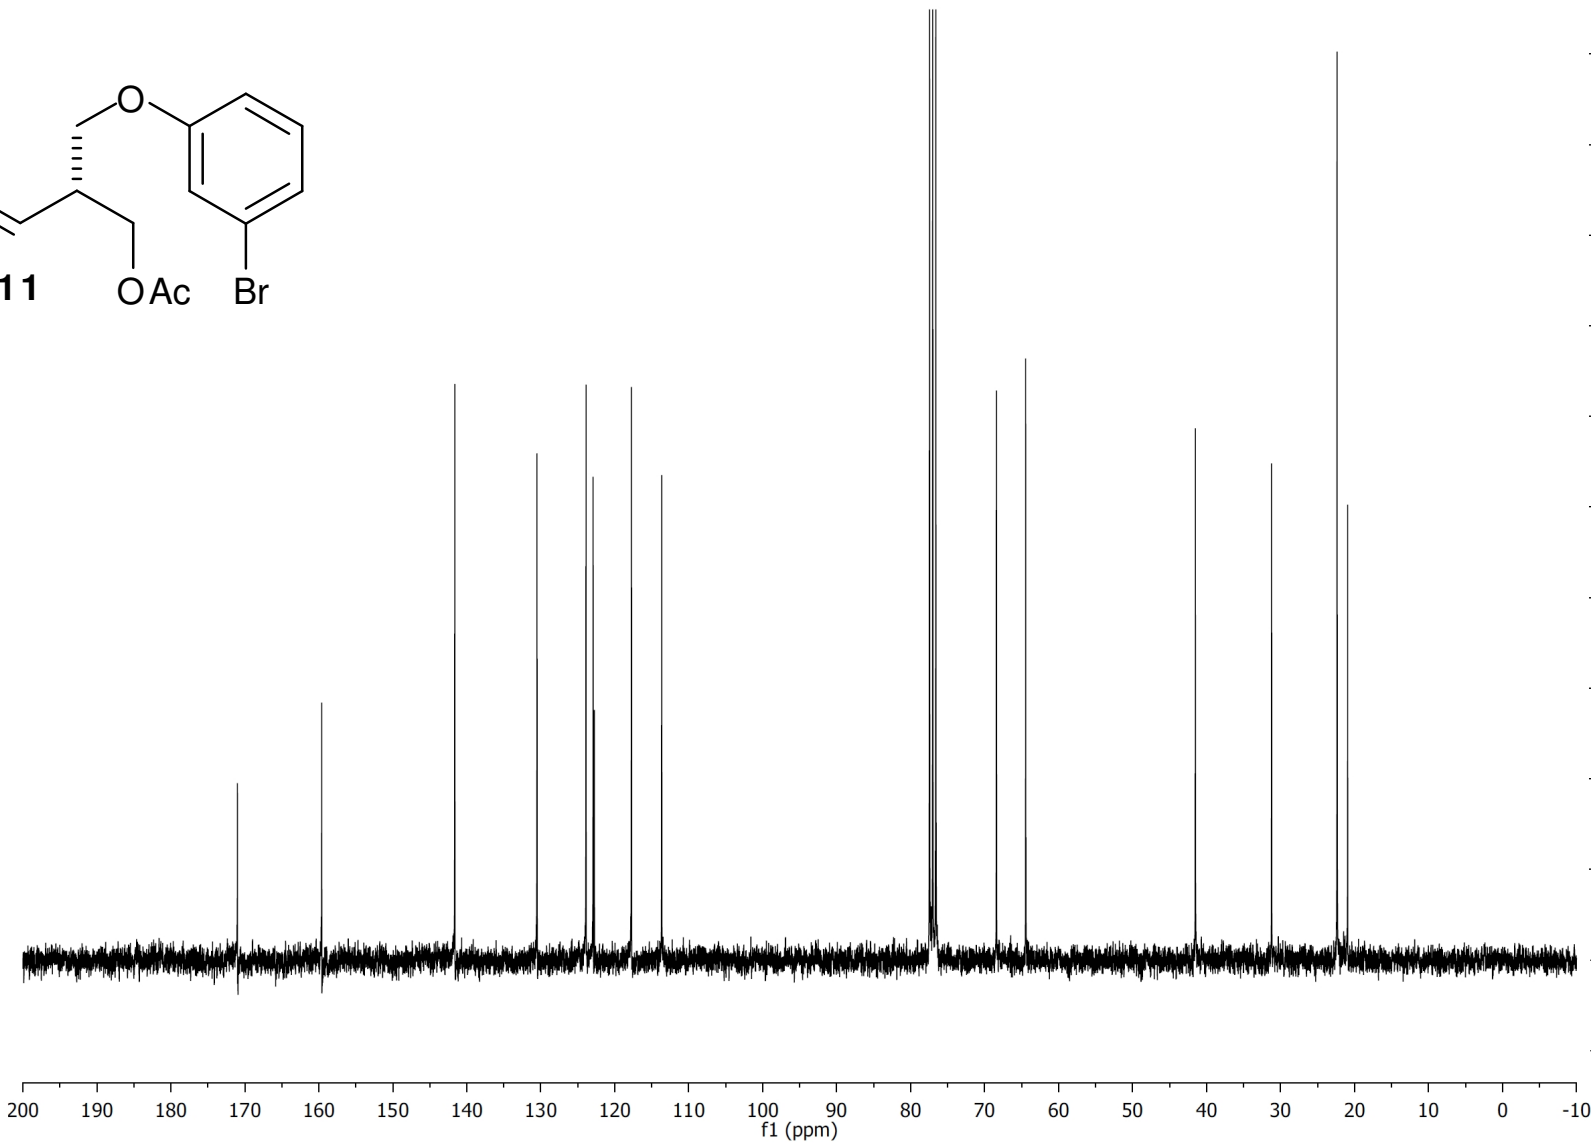

<sup>1</sup>H NMR of compound **12**

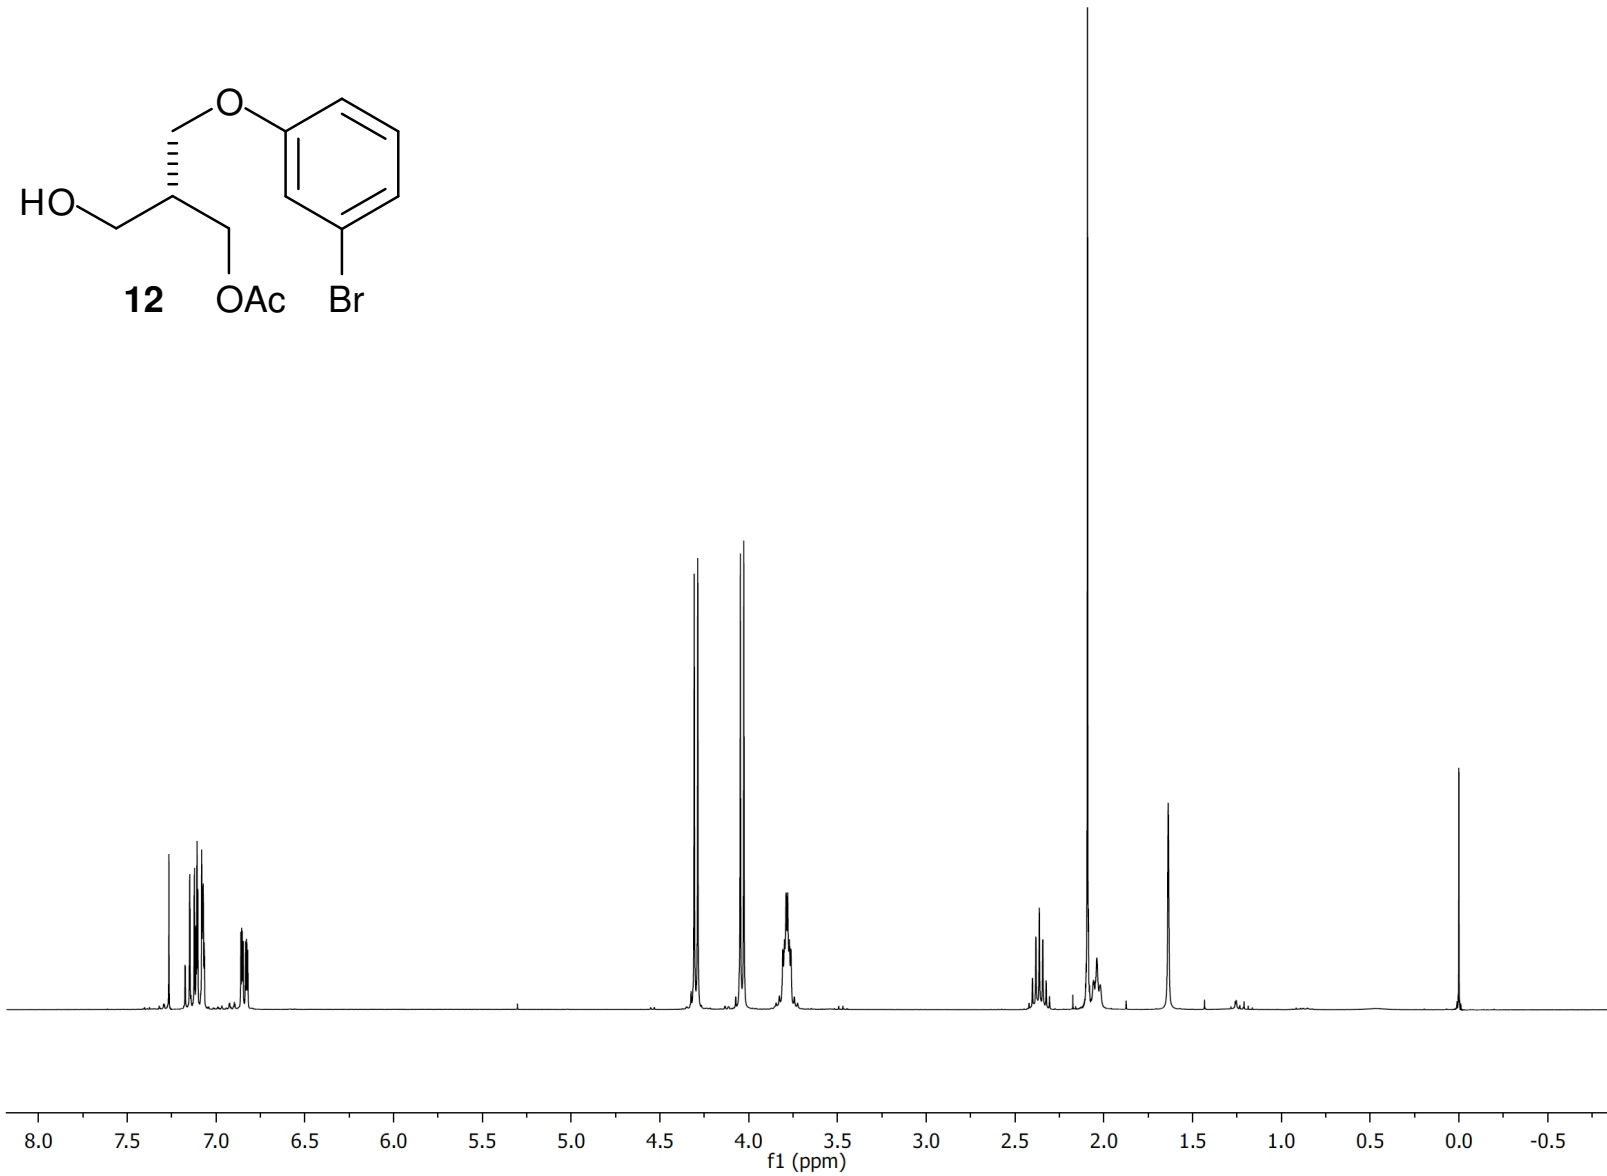



<sup>13</sup>C NMR of compound **12**

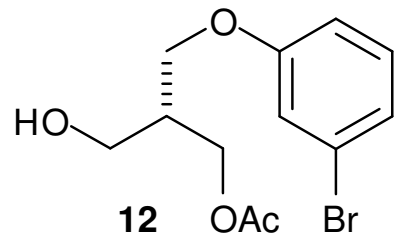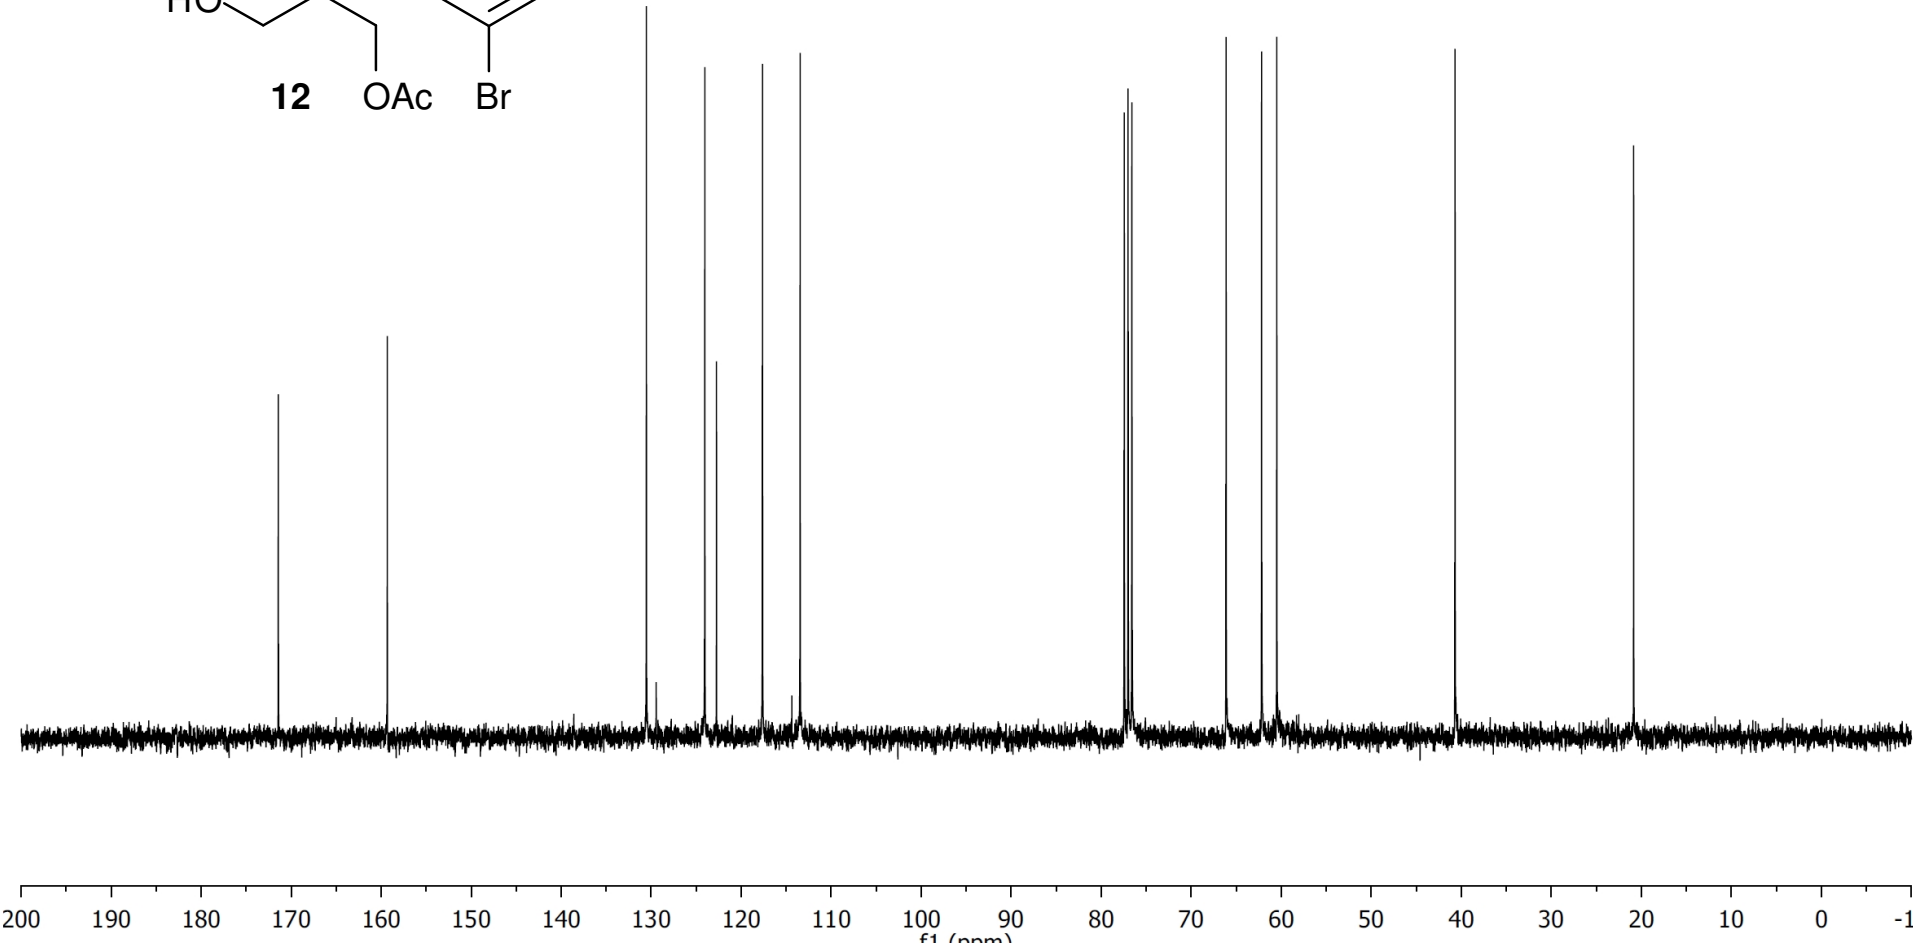

<sup>1</sup>H NMR of compound **13**

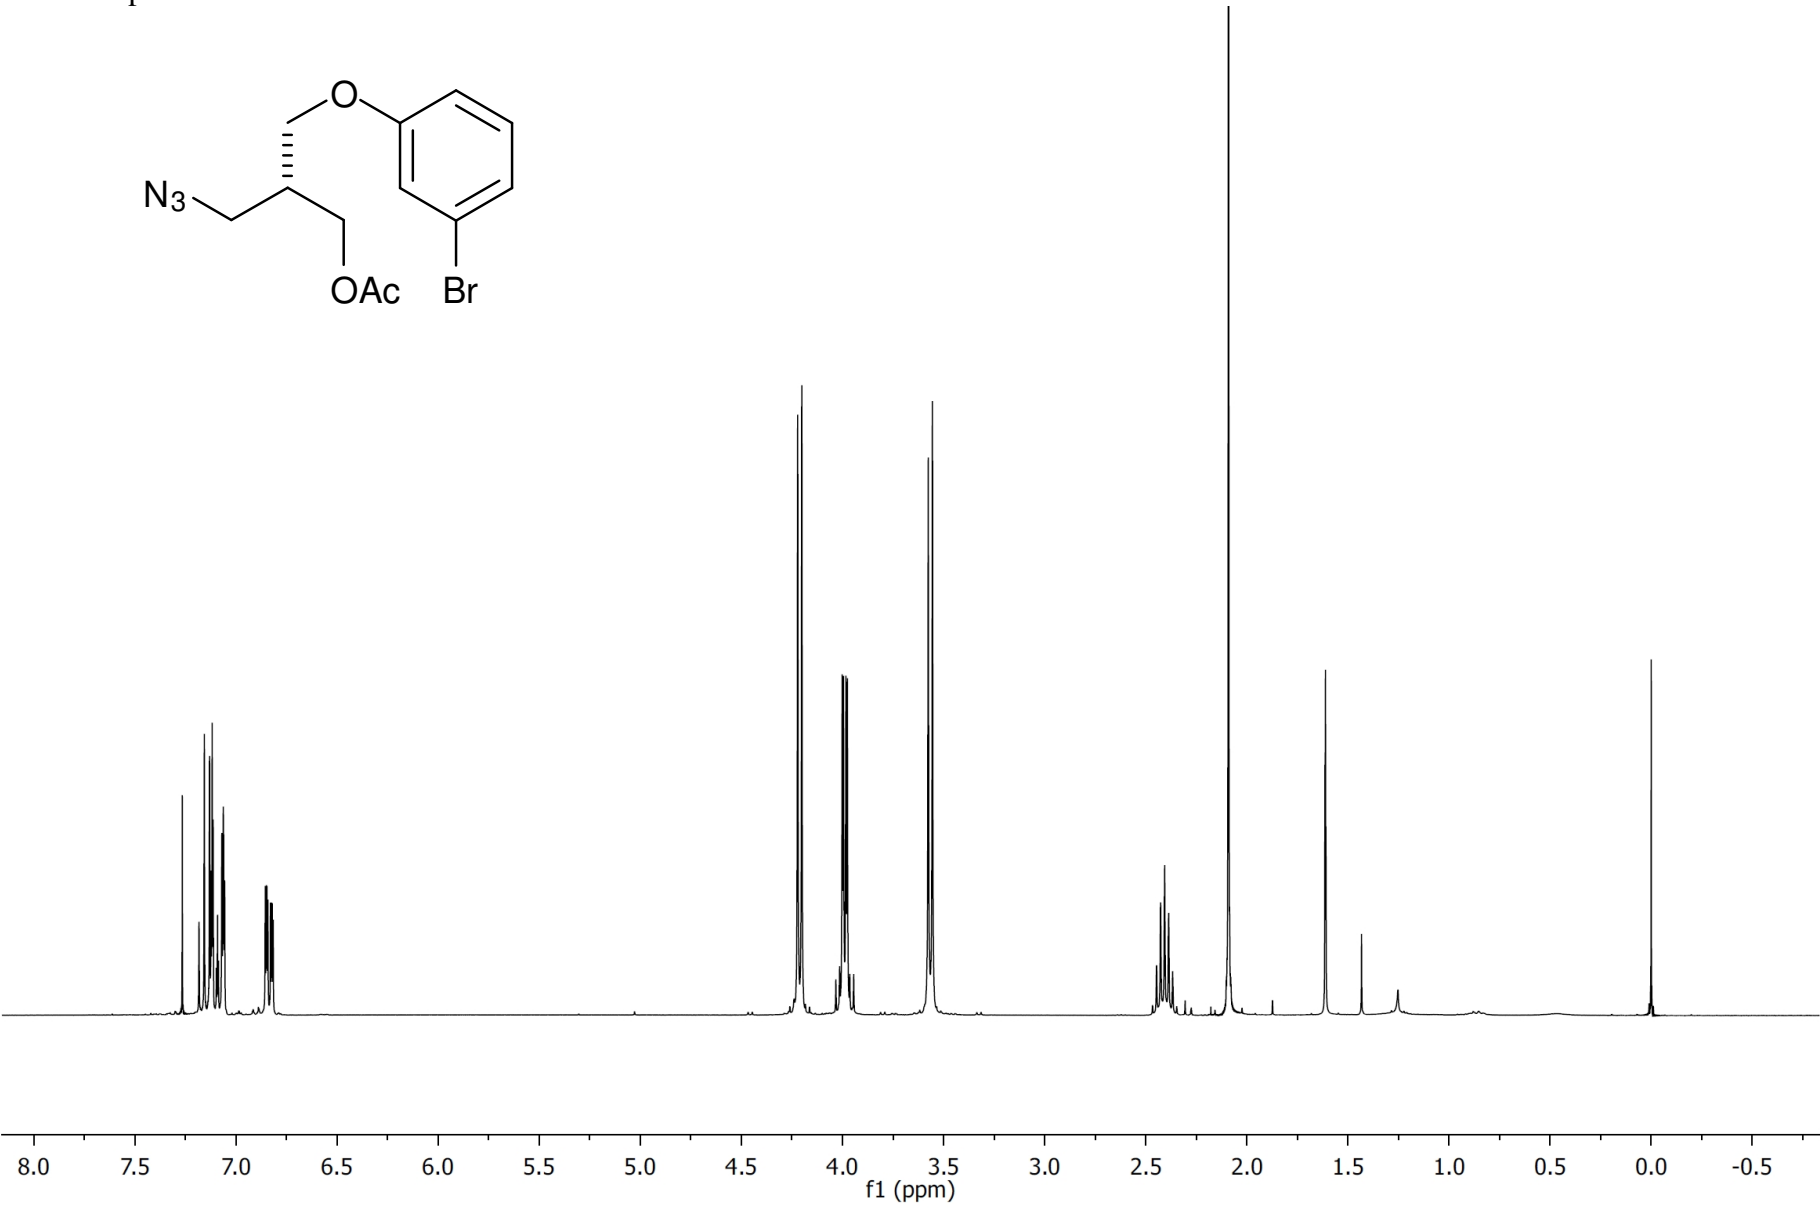

<sup>13</sup>C NMR of compound **13**

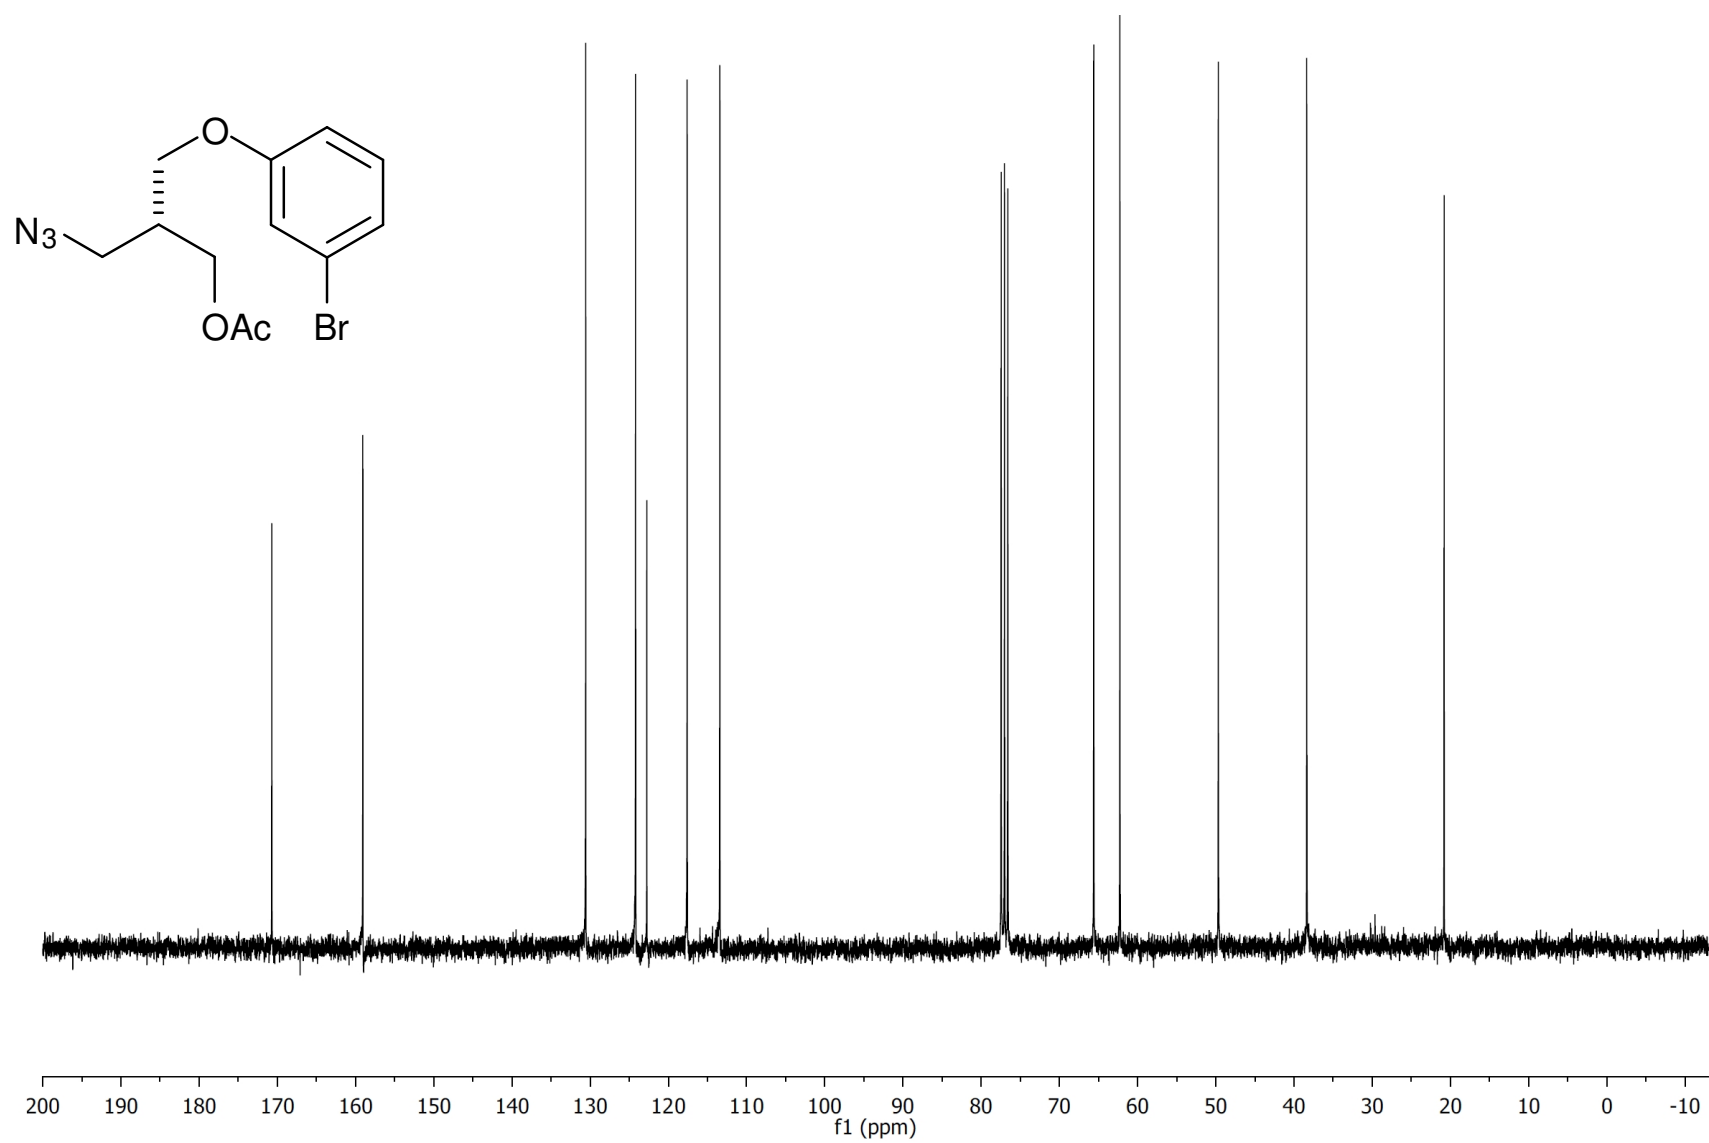

<sup>1</sup>H NMR of compound **14**

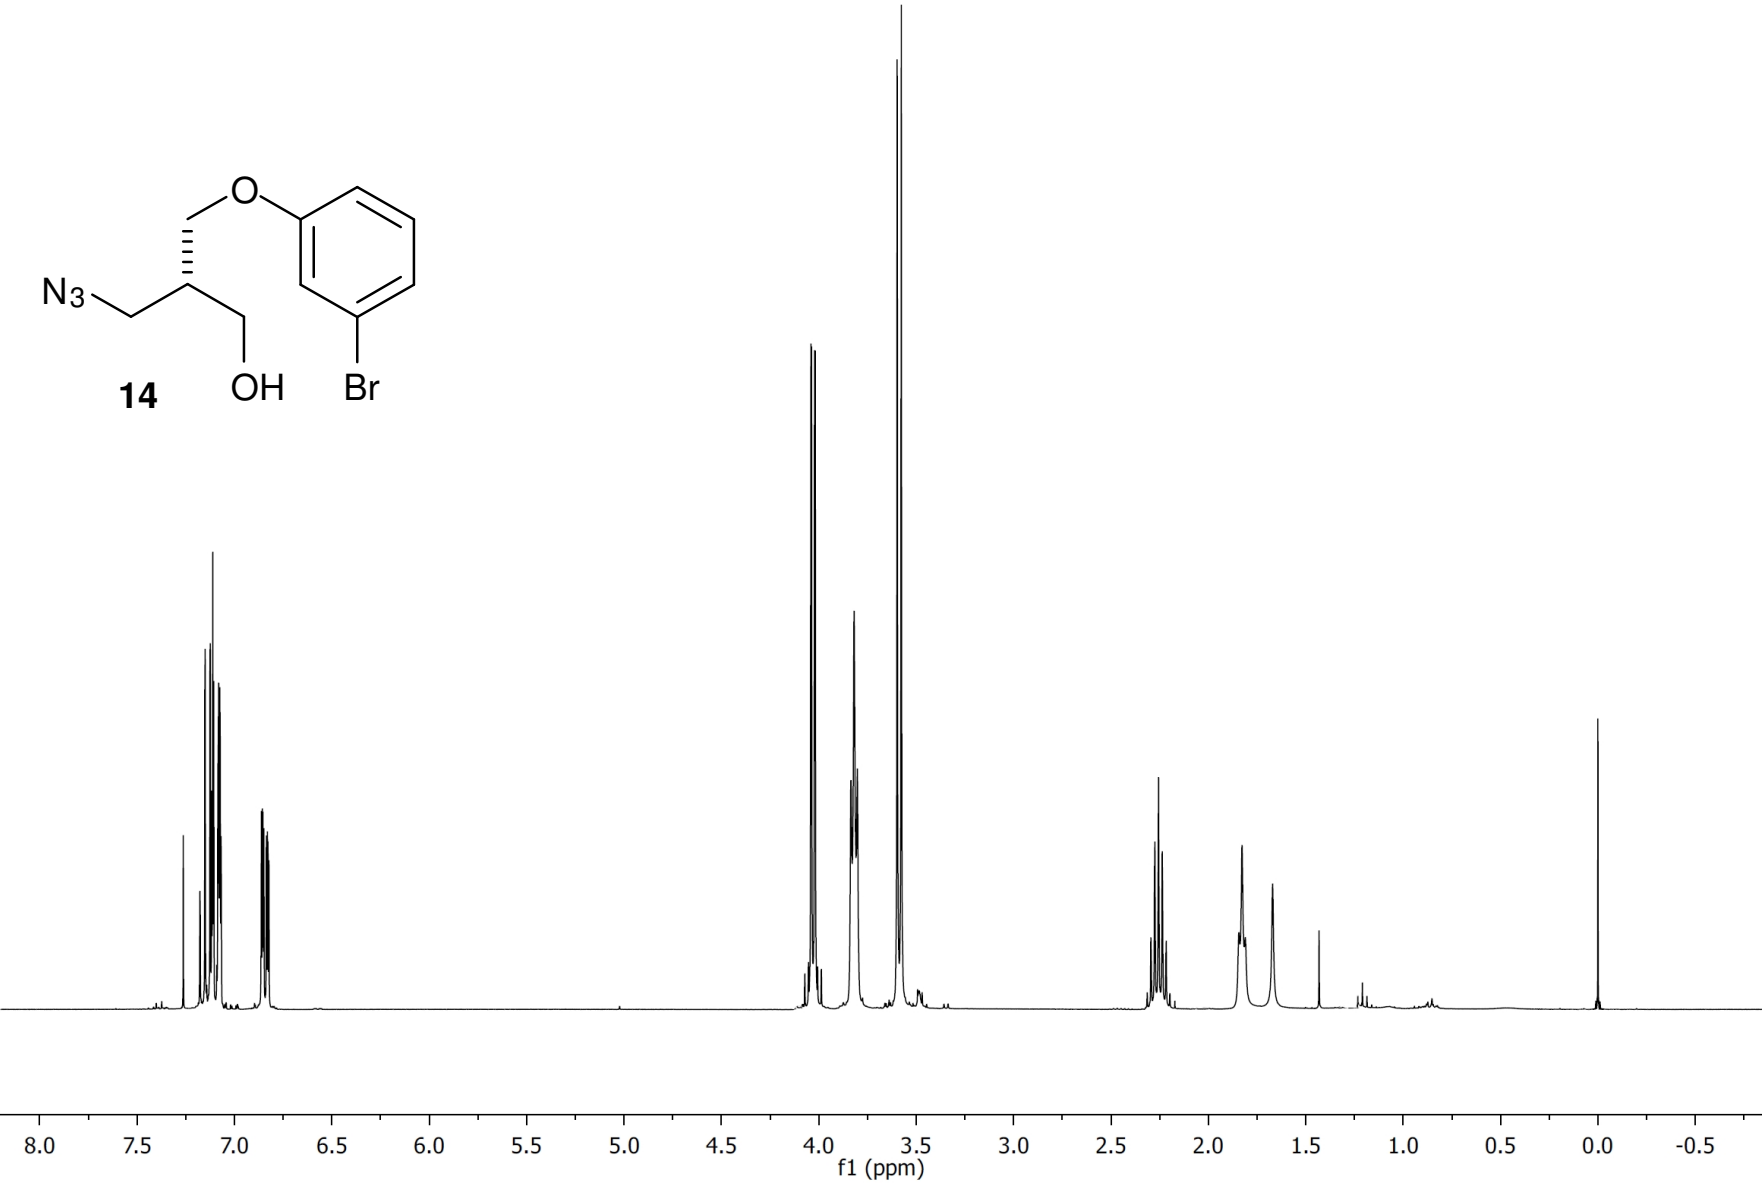

<sup>13</sup>C NMR of compound **14**

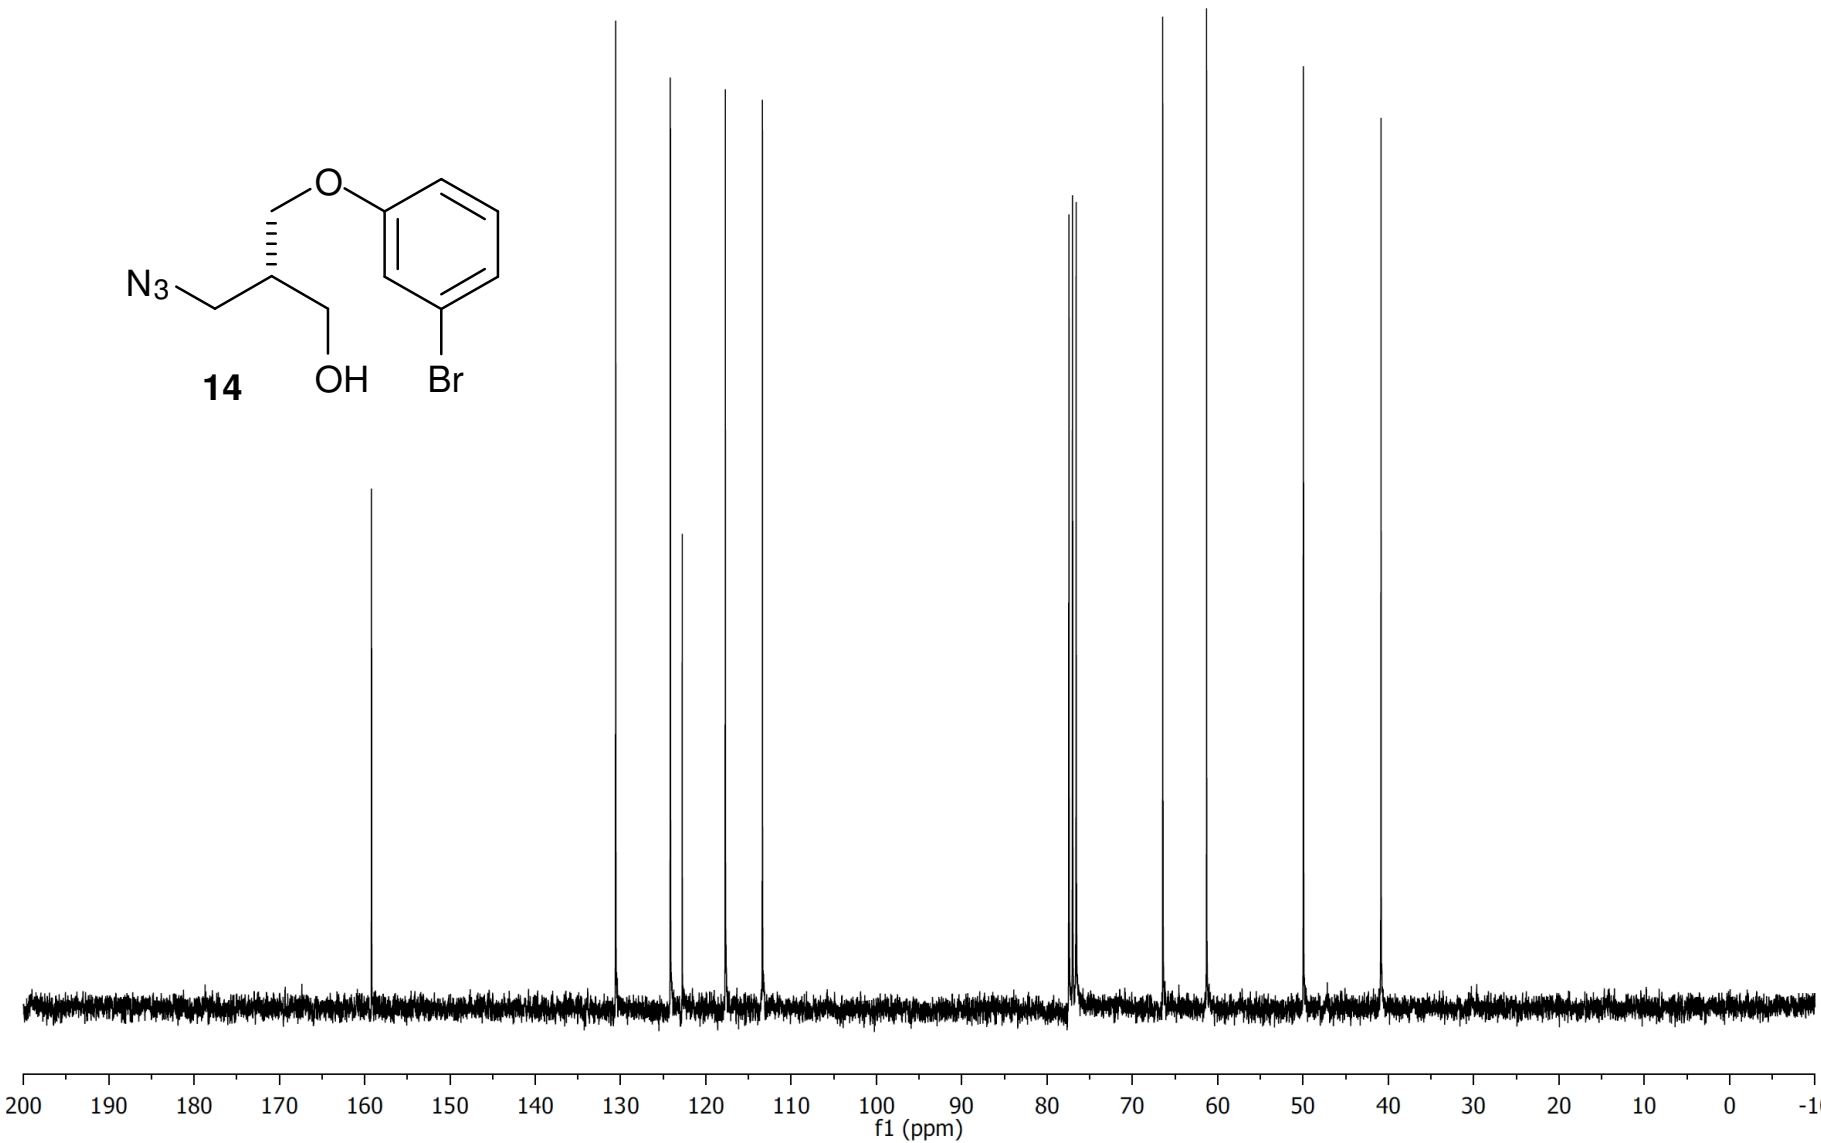

<sup>1</sup>H NMR of compound **15**

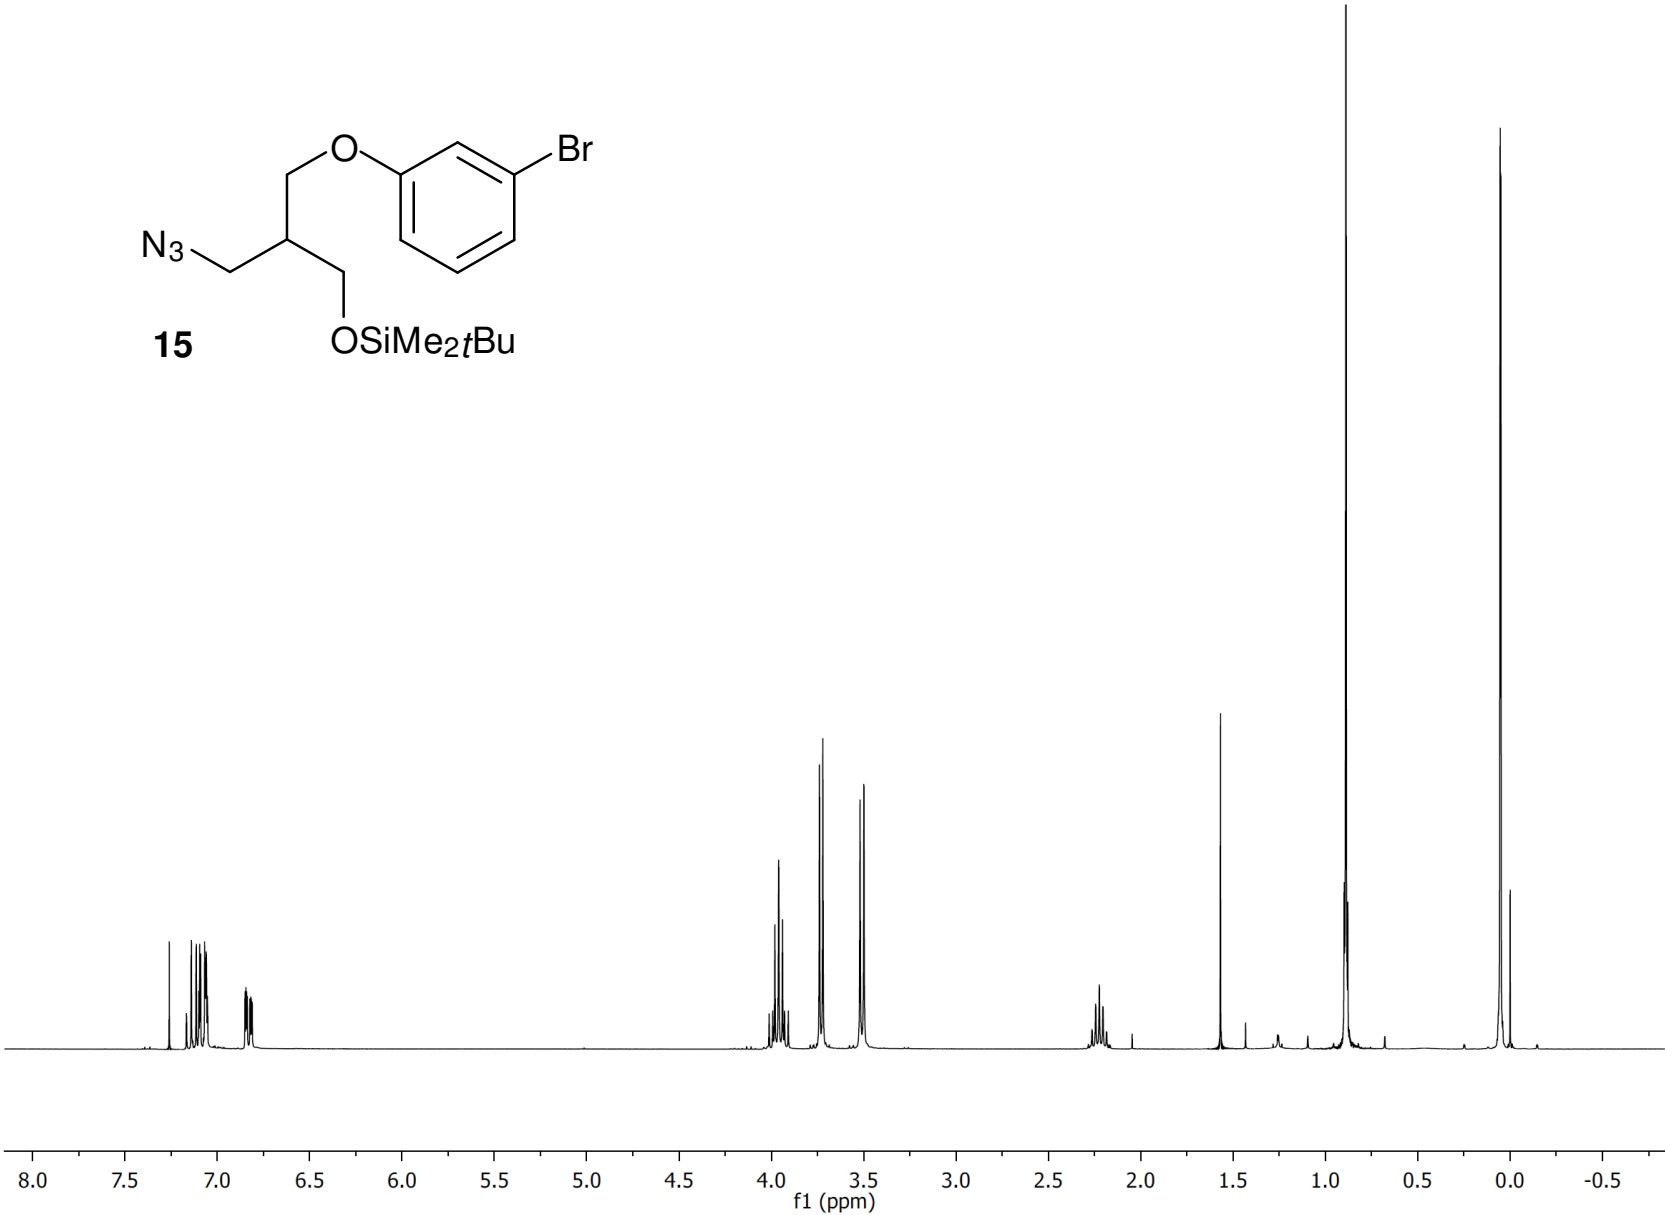

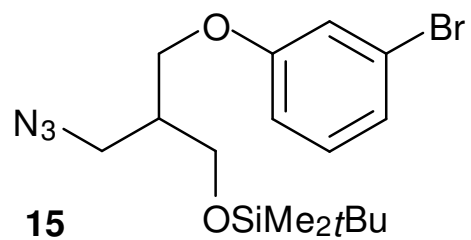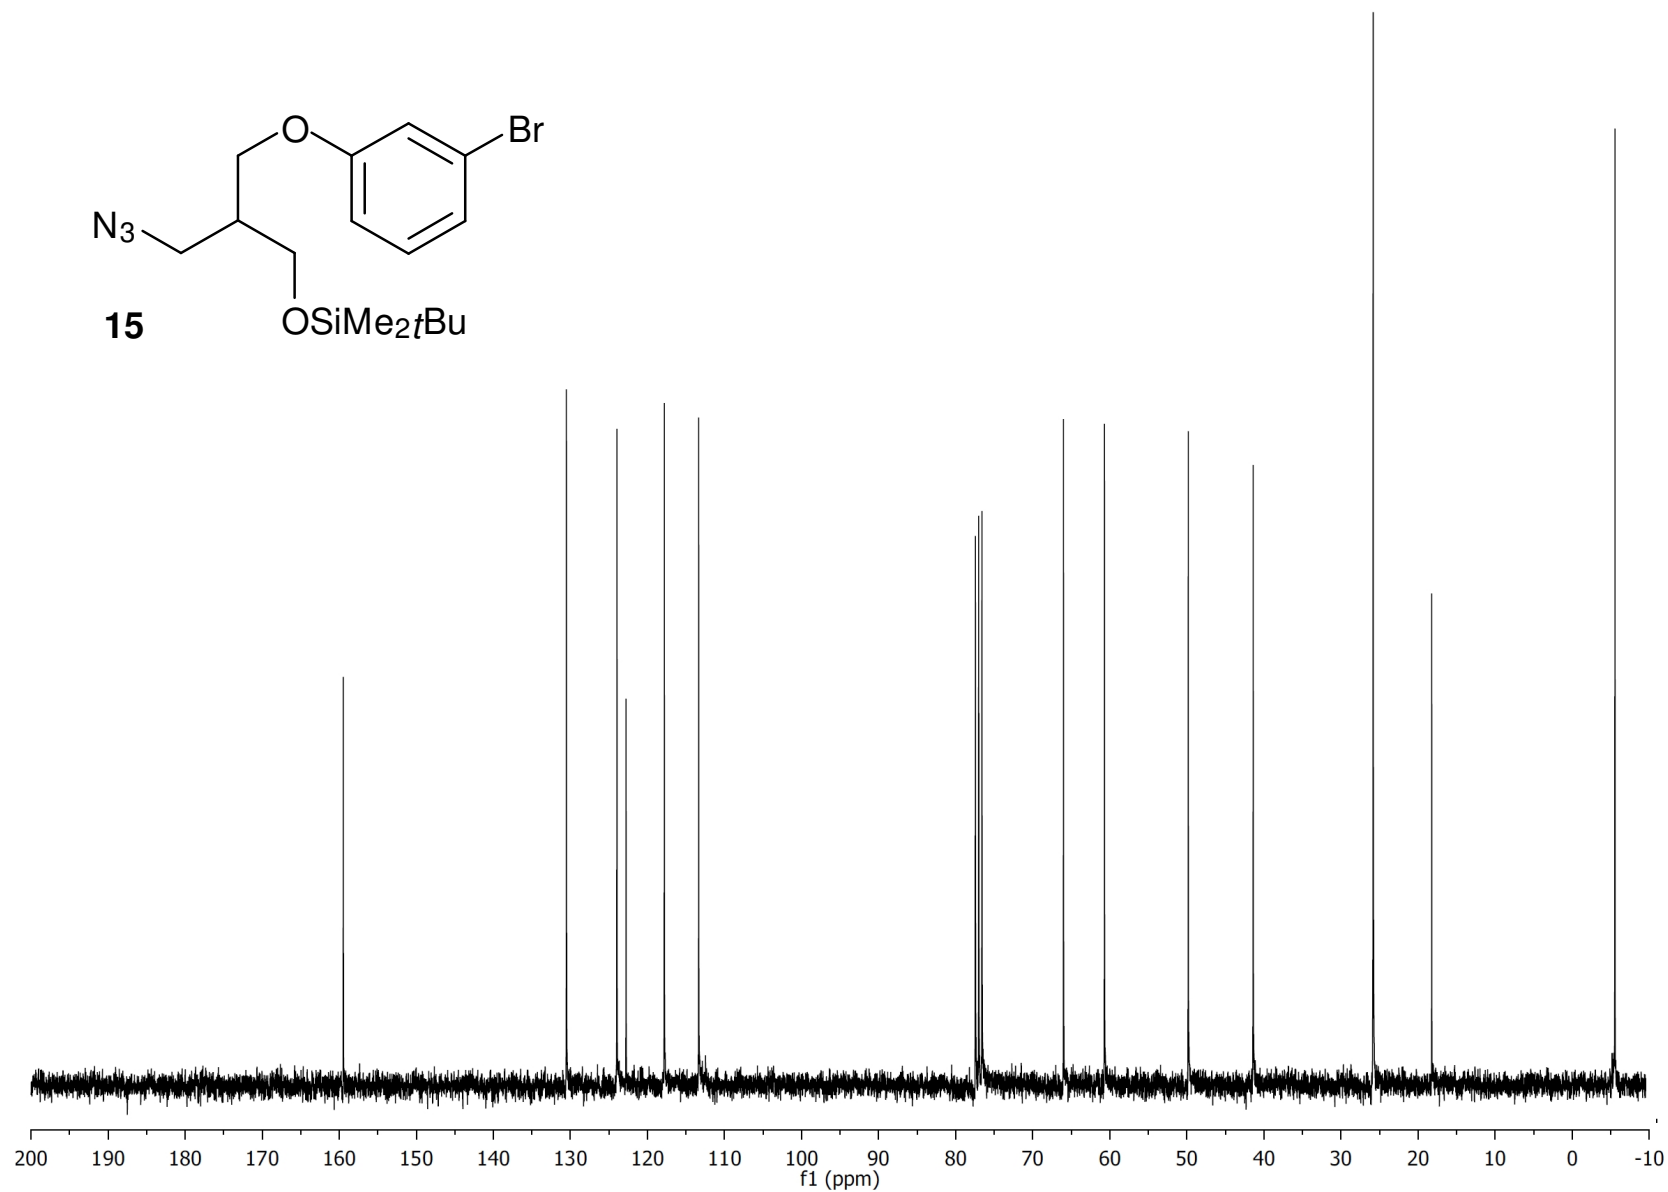

<sup>1</sup>H NMR of compound **16**

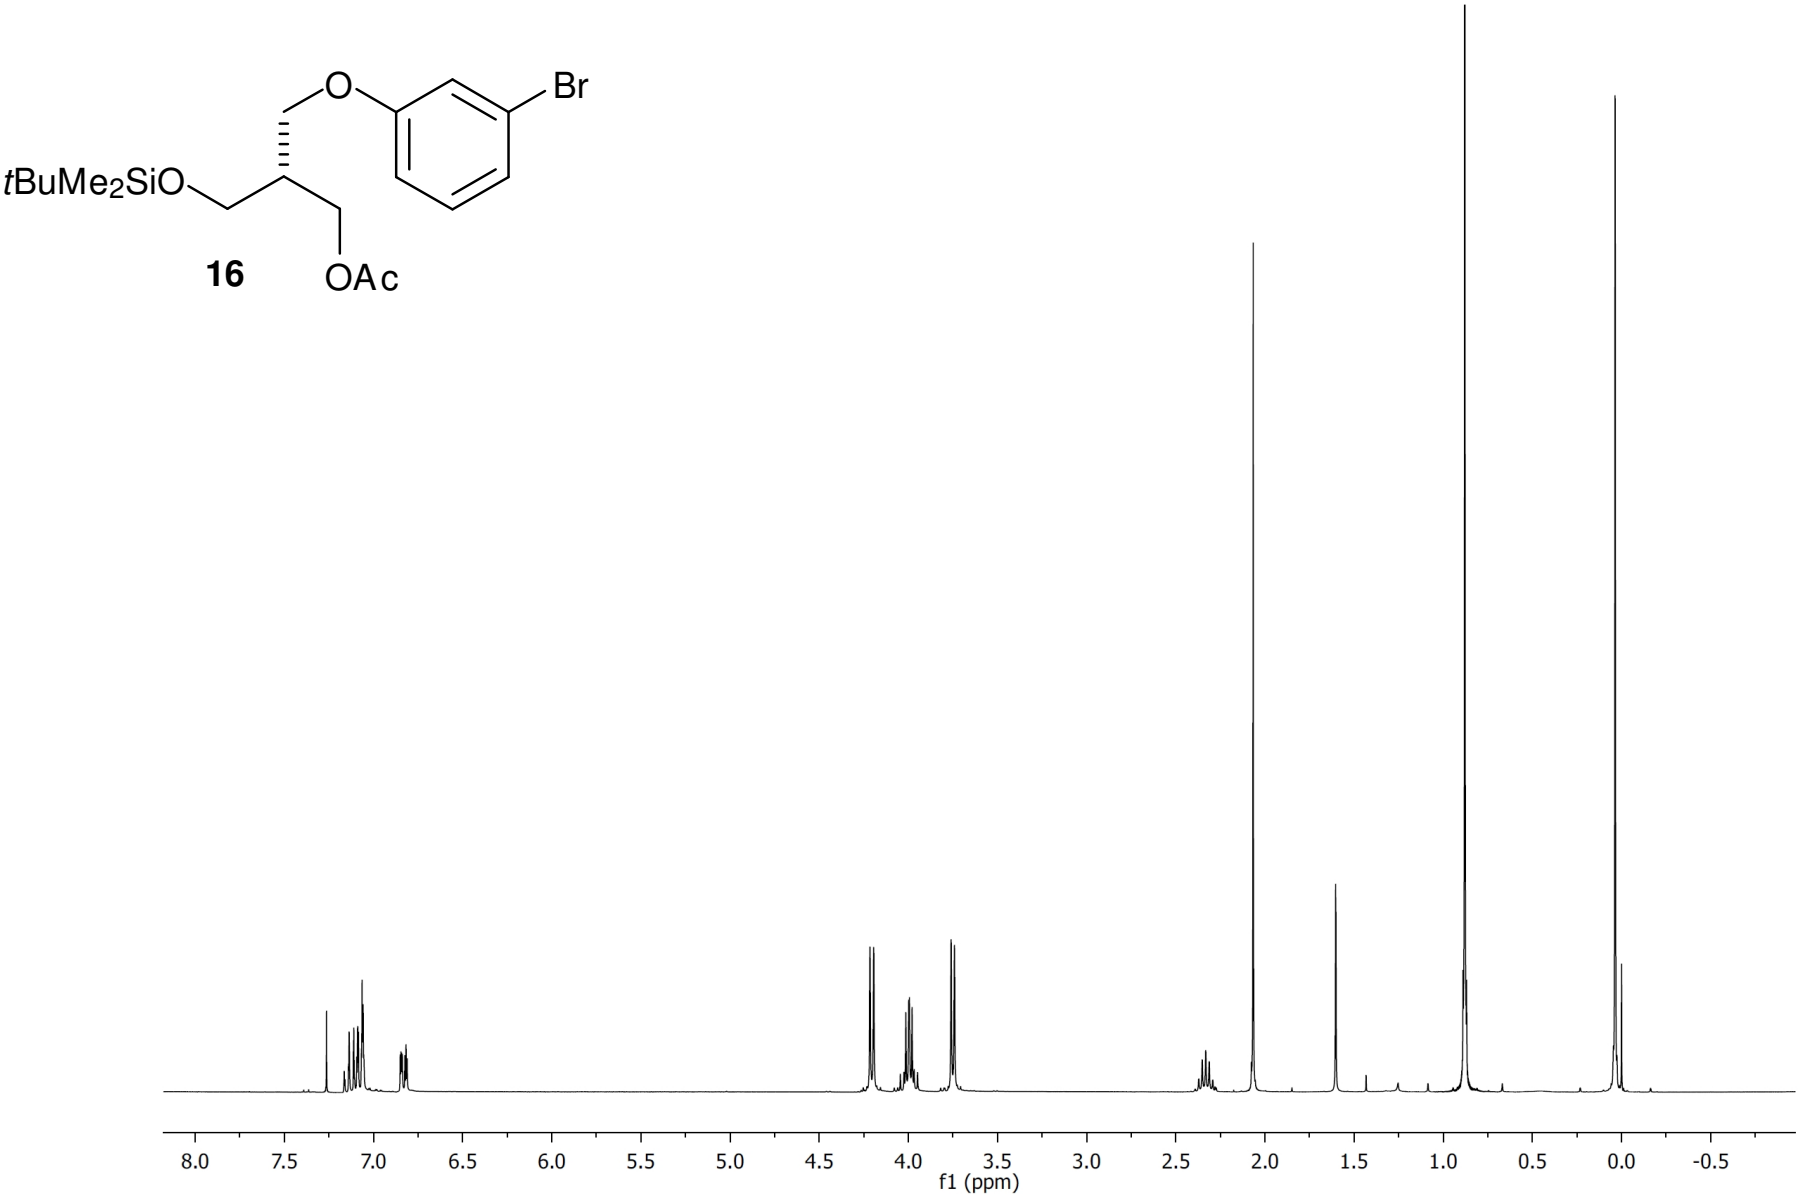



<sup>13</sup>C NMR of compound **16**

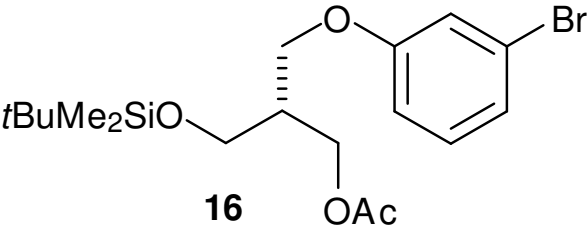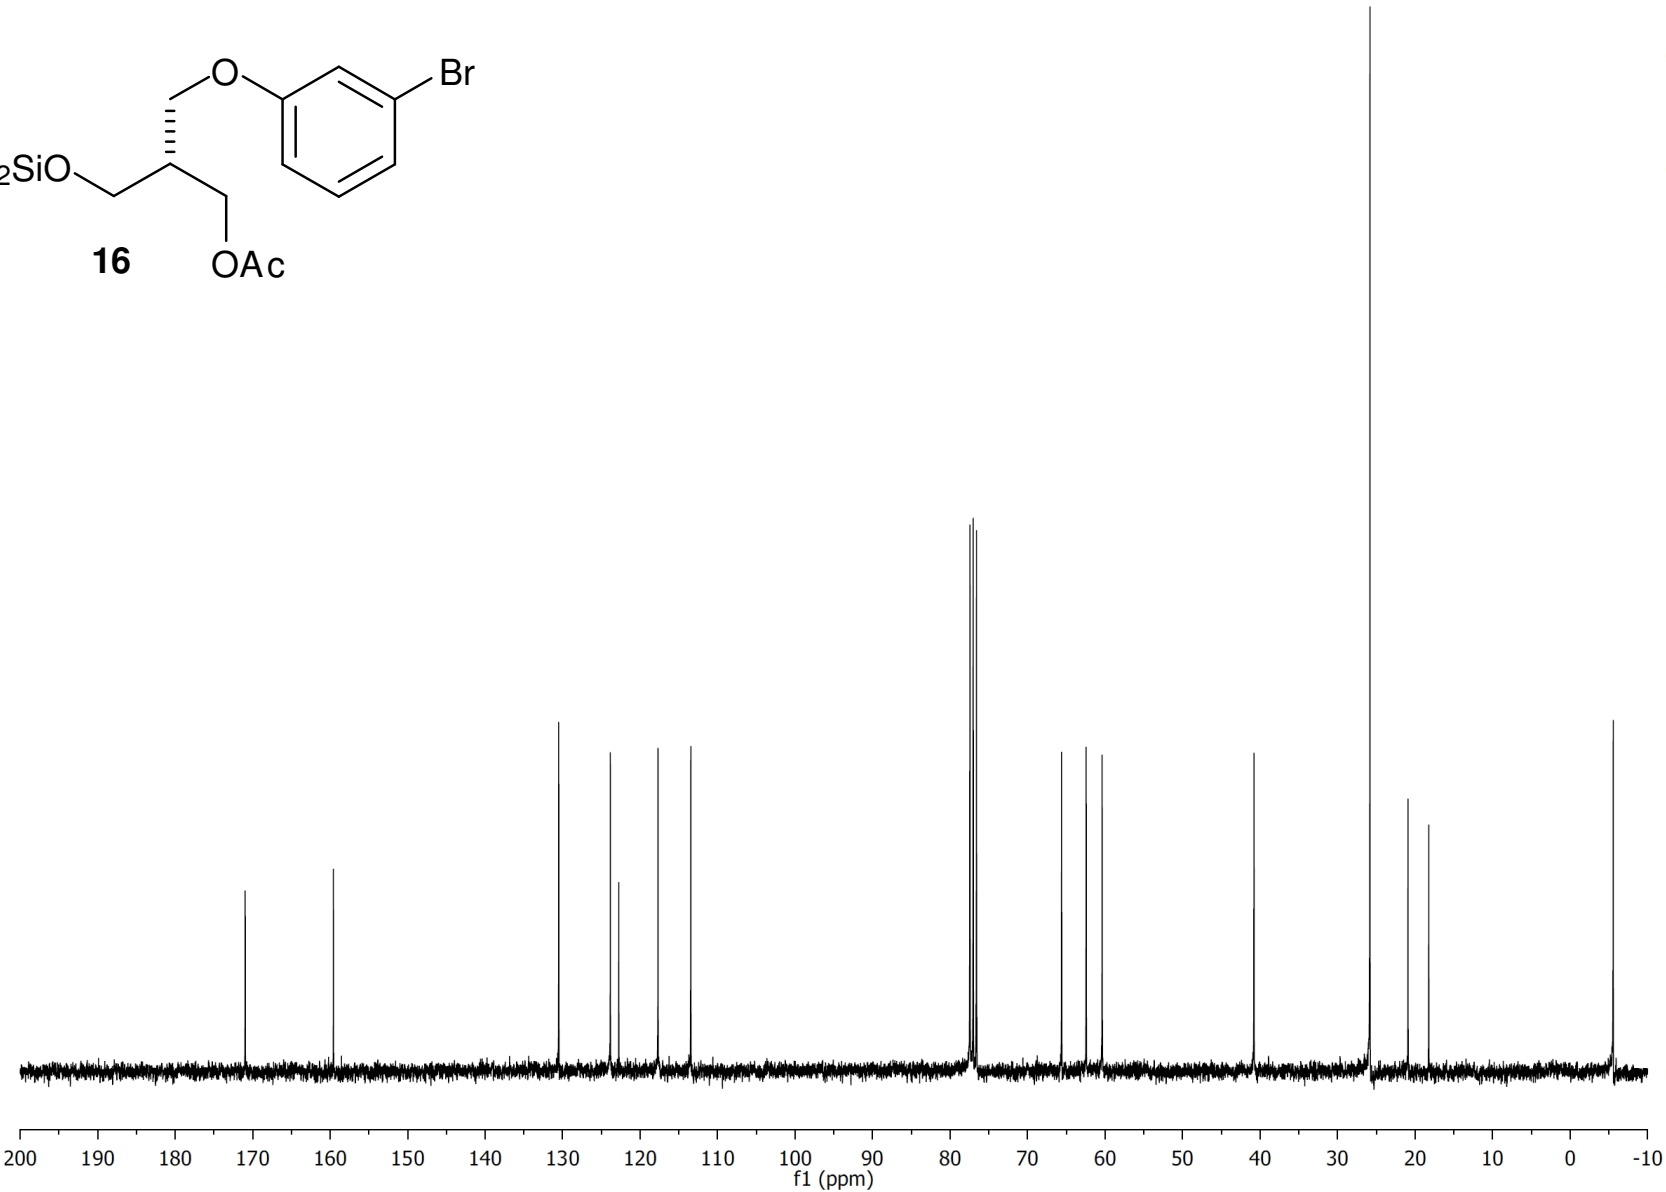

<sup>1</sup>H NMR of compound **17**

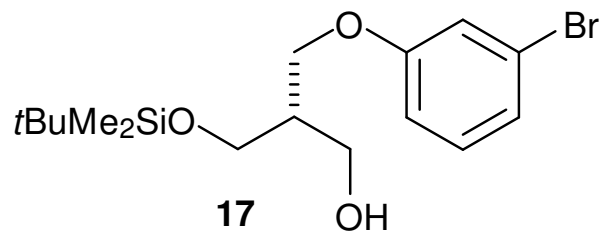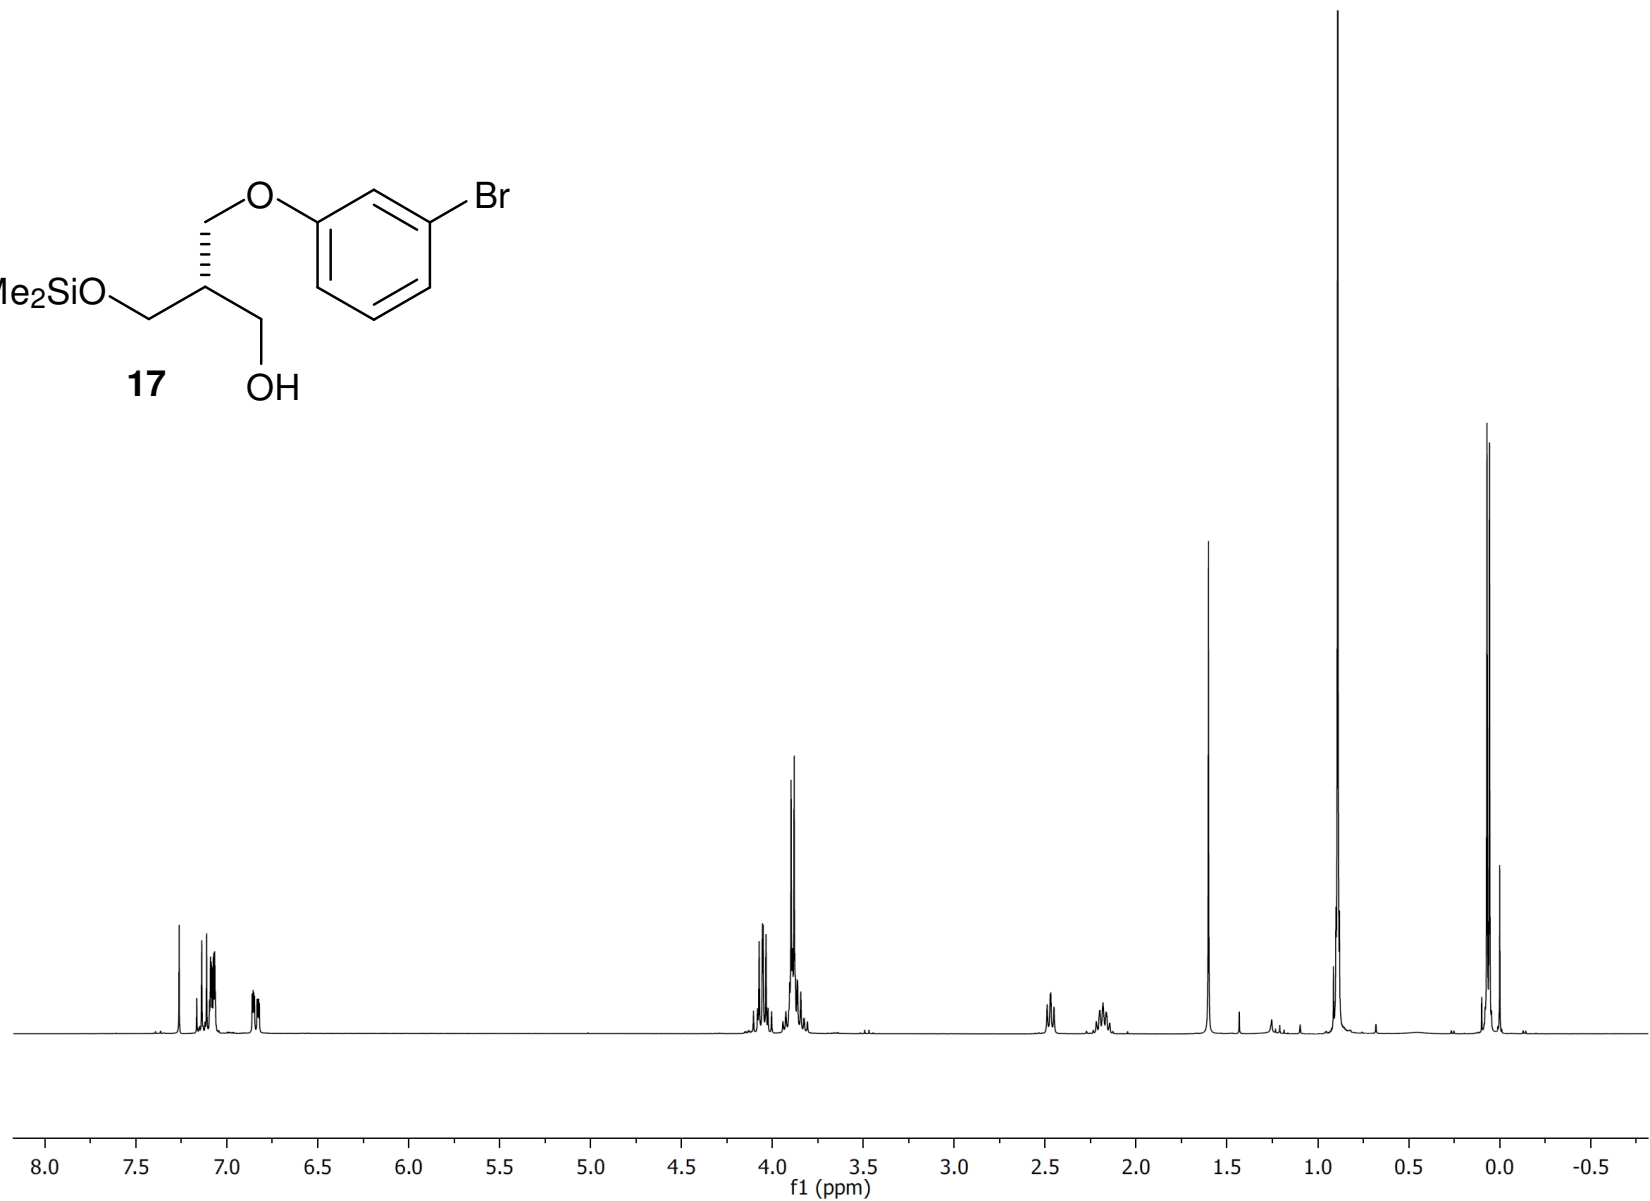

<sup>13</sup>C NMR of compound **17**

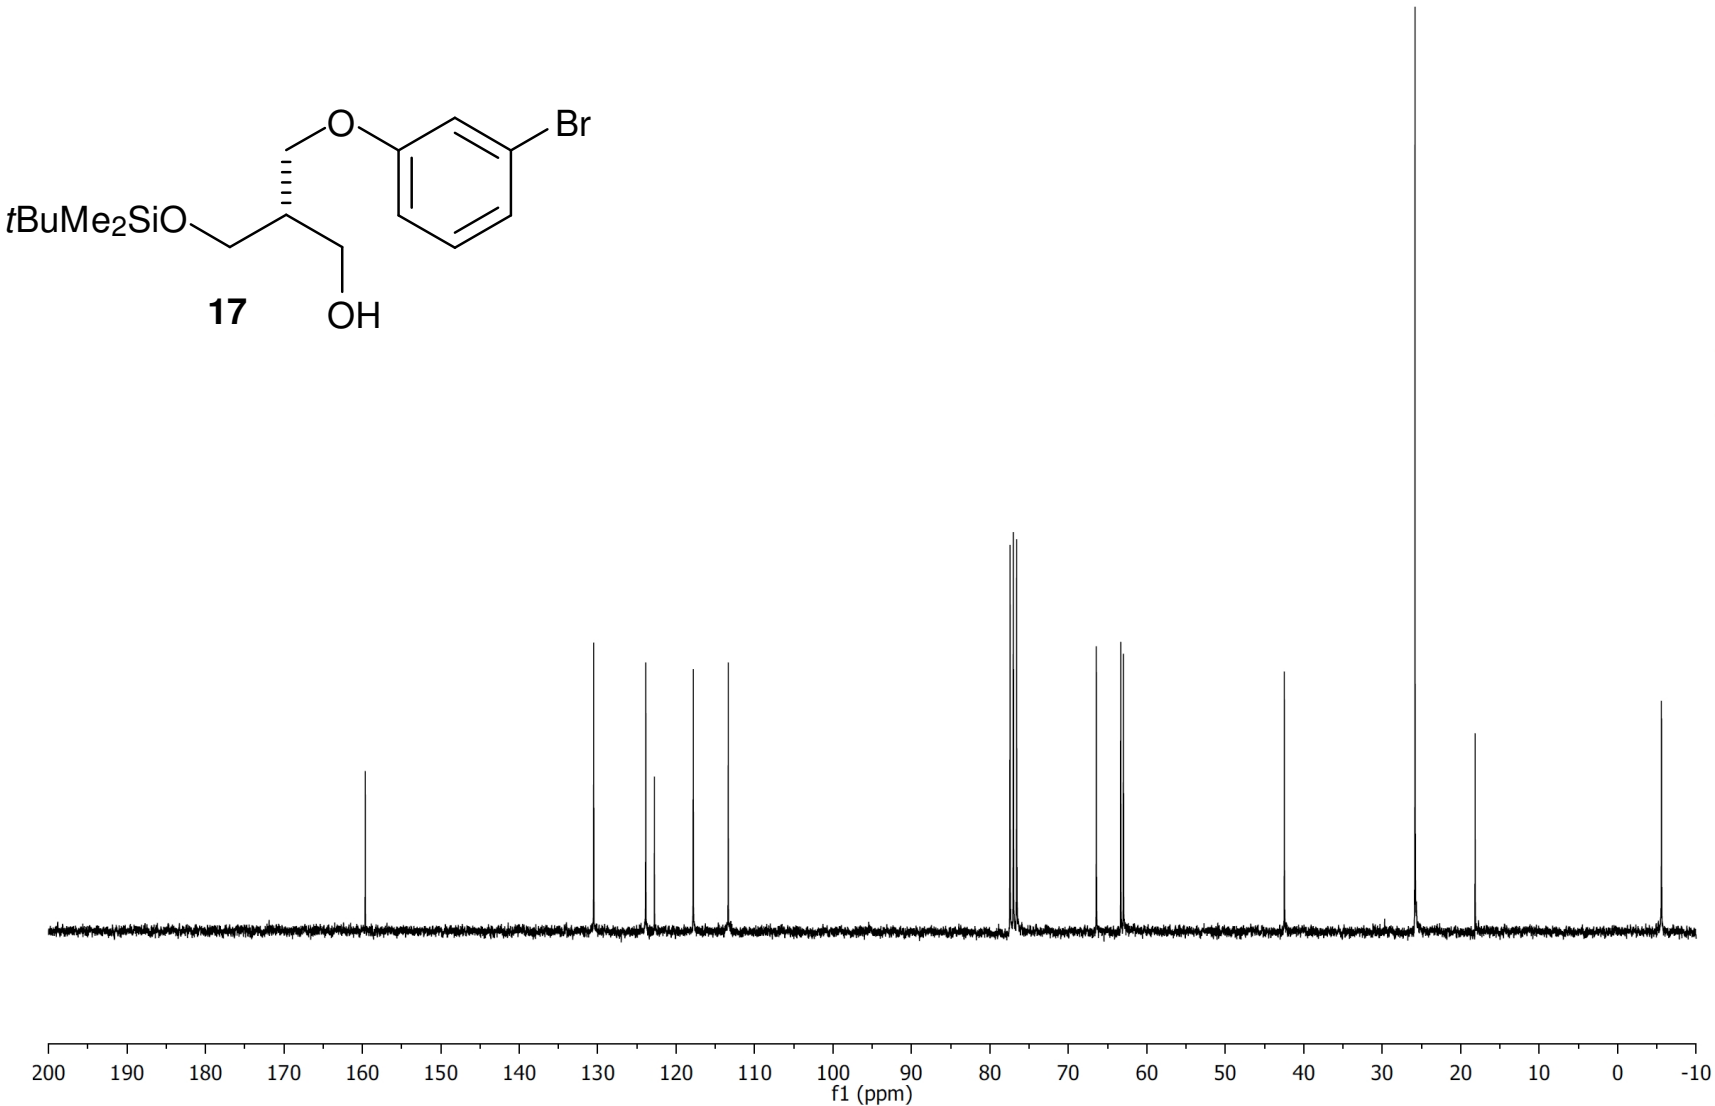

<sup>1</sup>H NMR of compound **18**

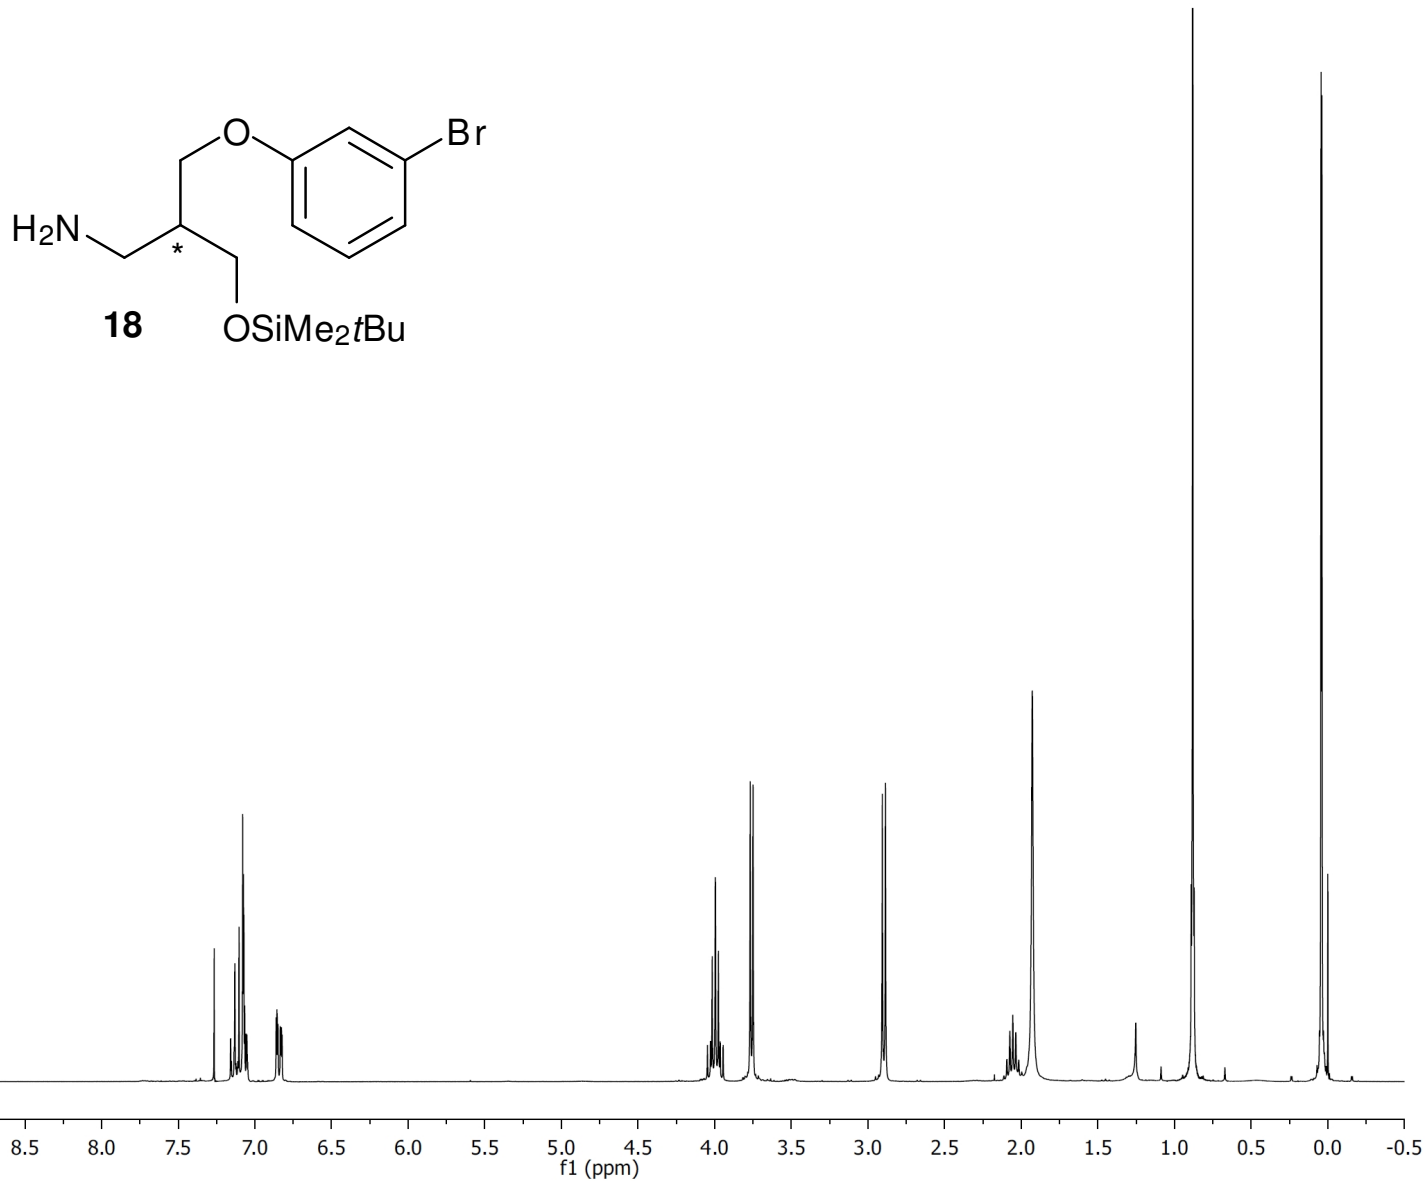

<sup>13</sup>C NMR of compound **18**

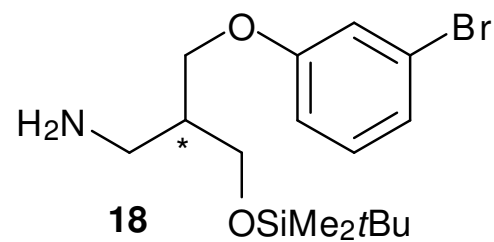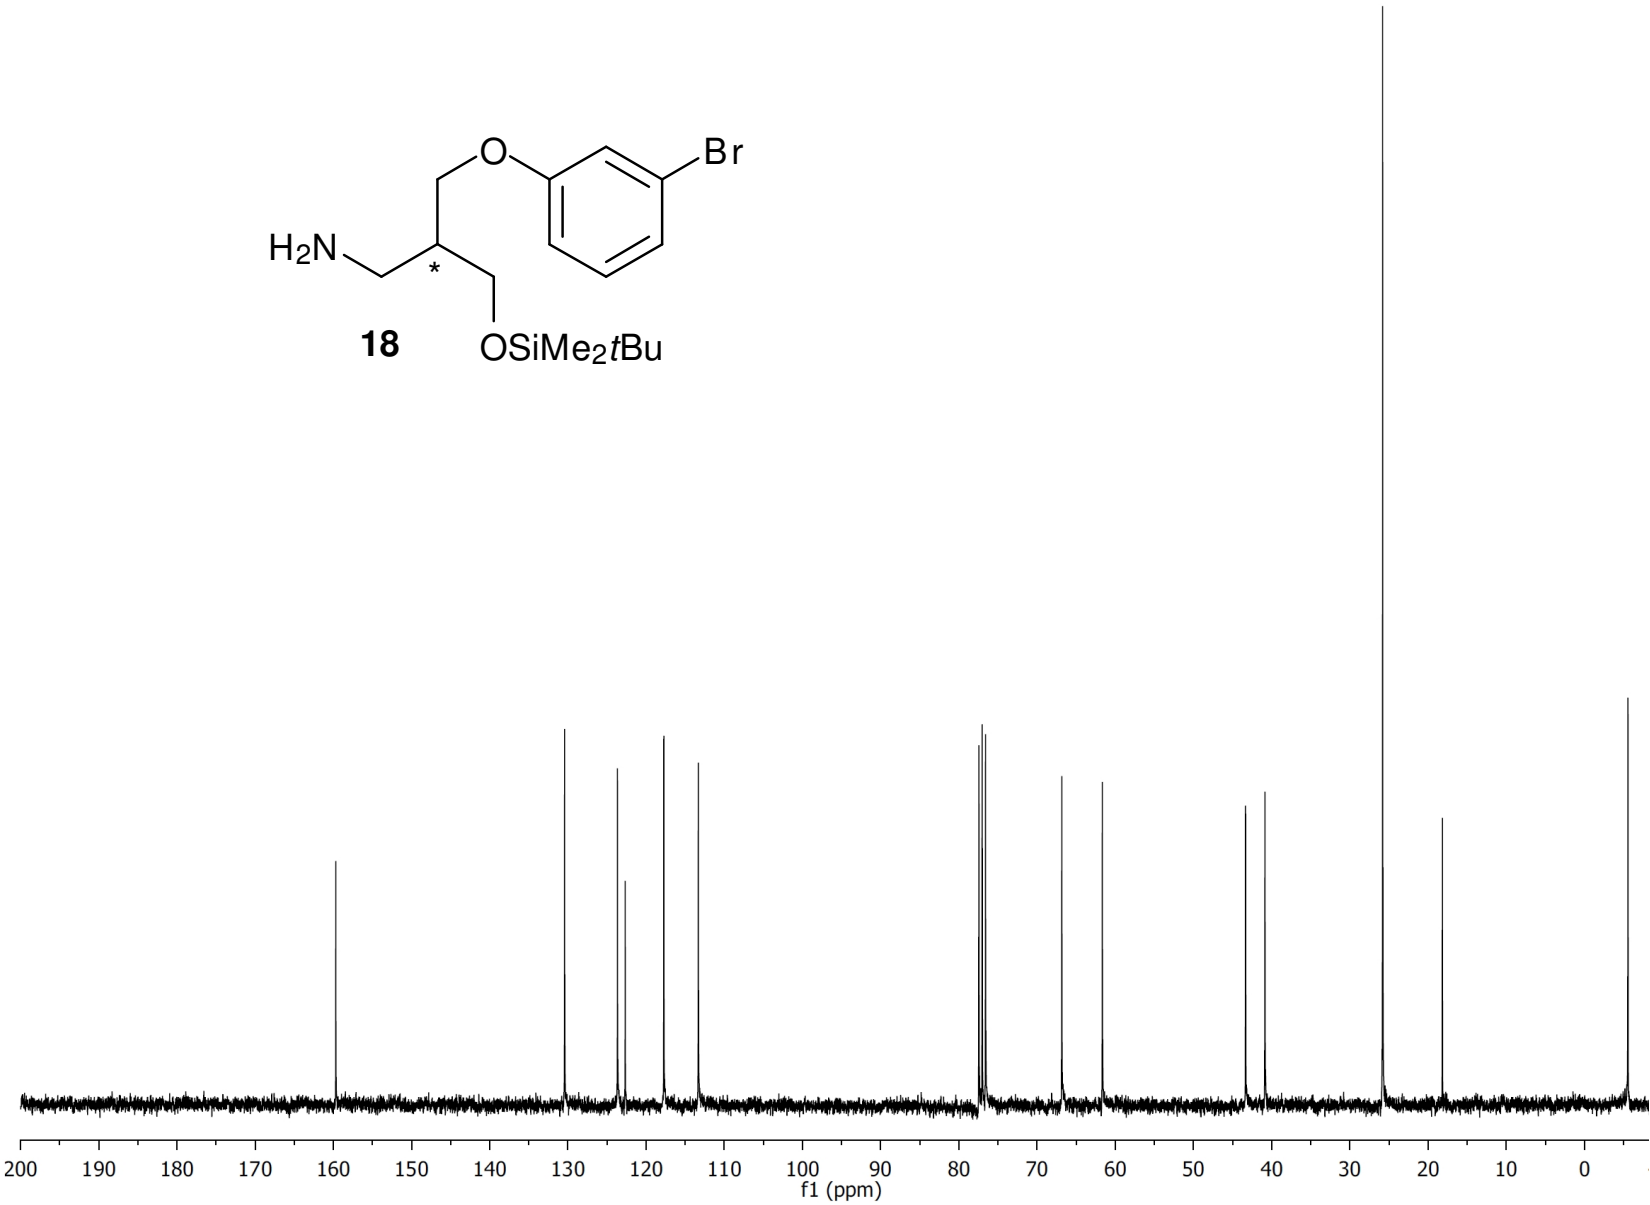

<sup>1</sup>H NMR of compound **19**

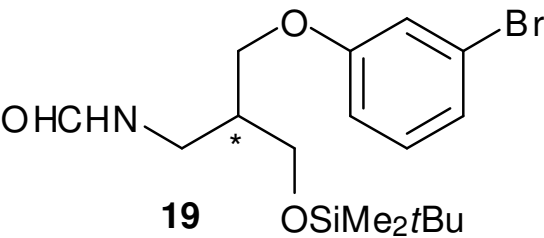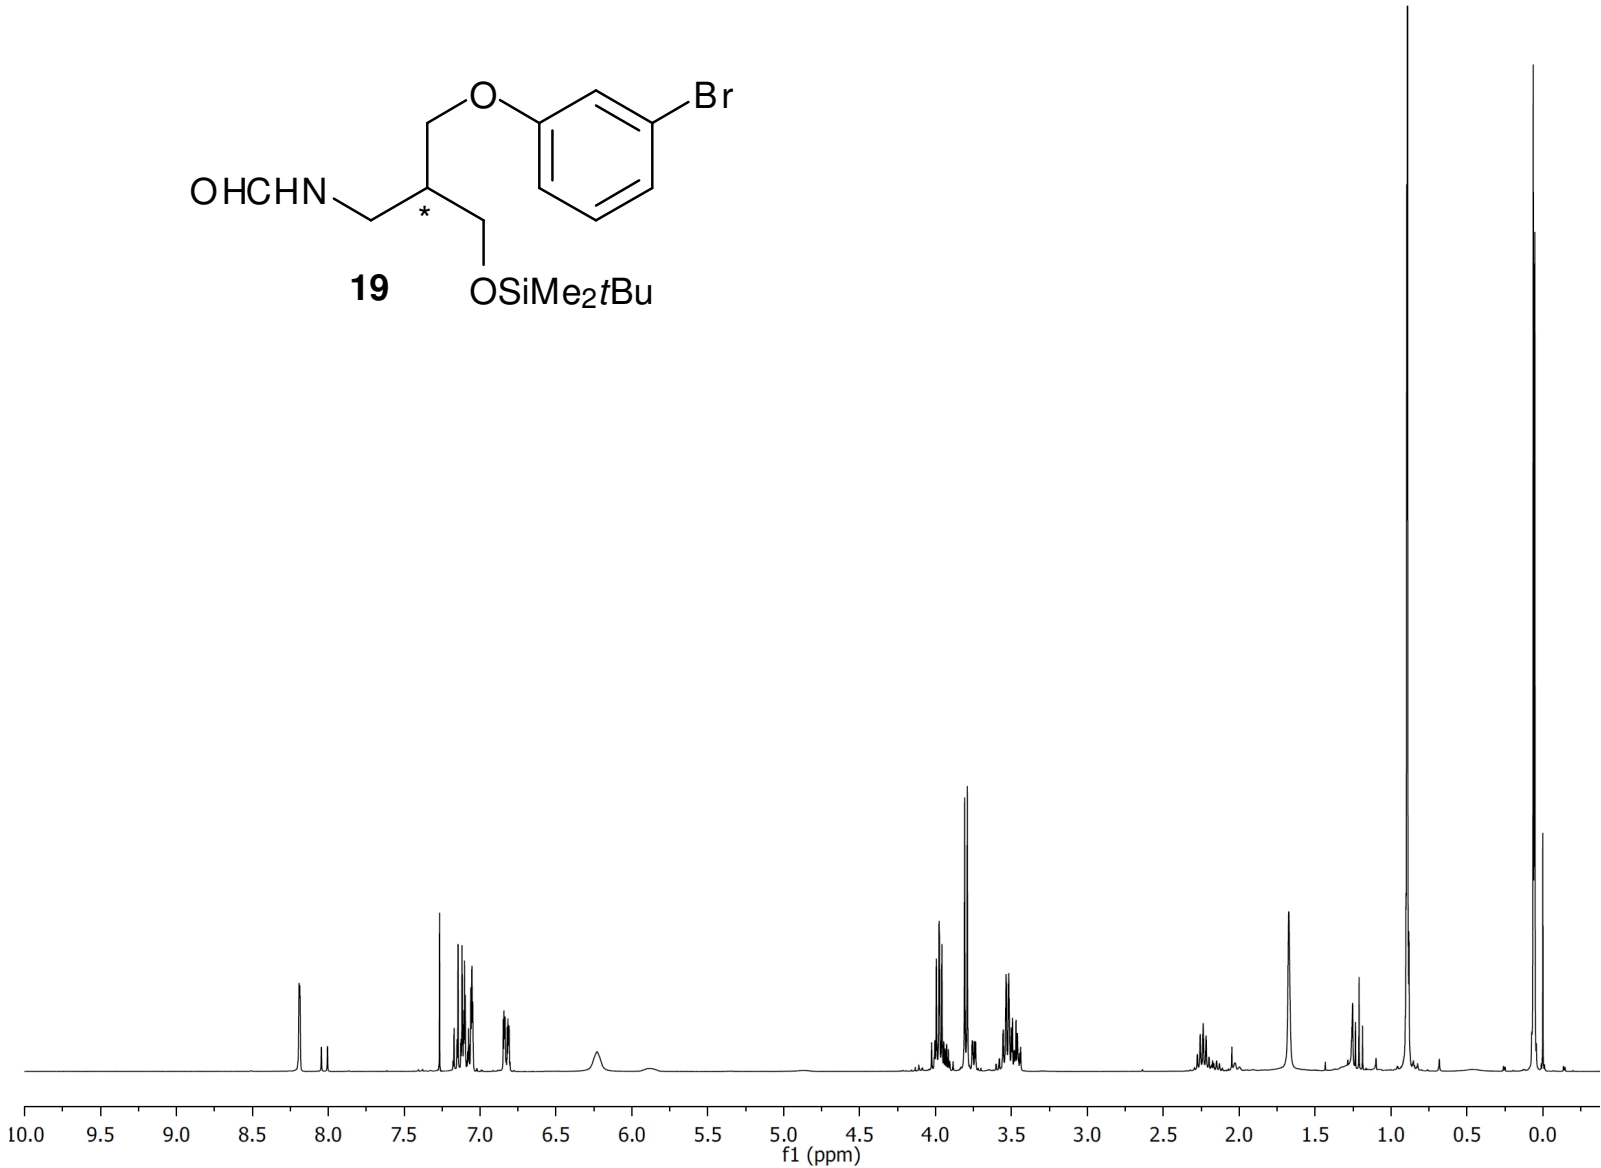

<sup>13</sup>C NMR of compound **19**

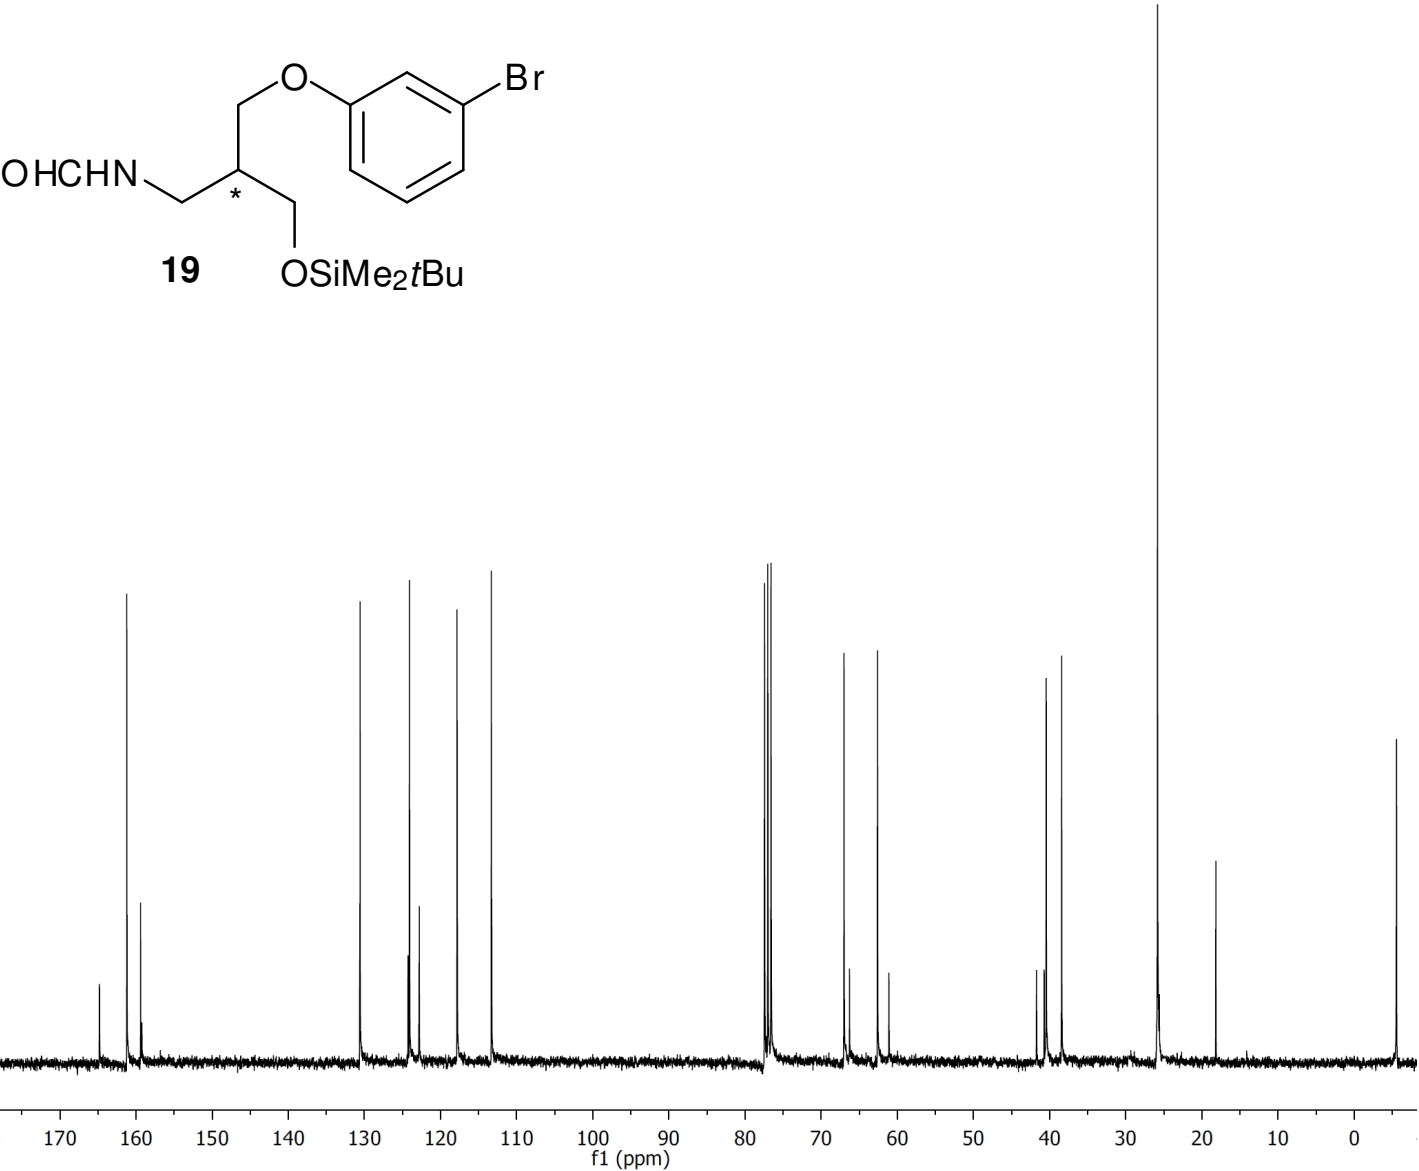

<sup>1</sup>H NMR of compound **20**

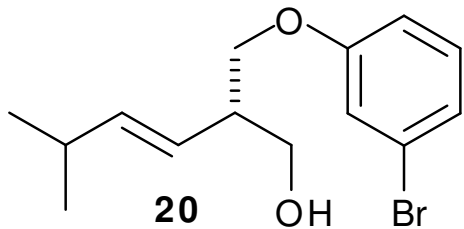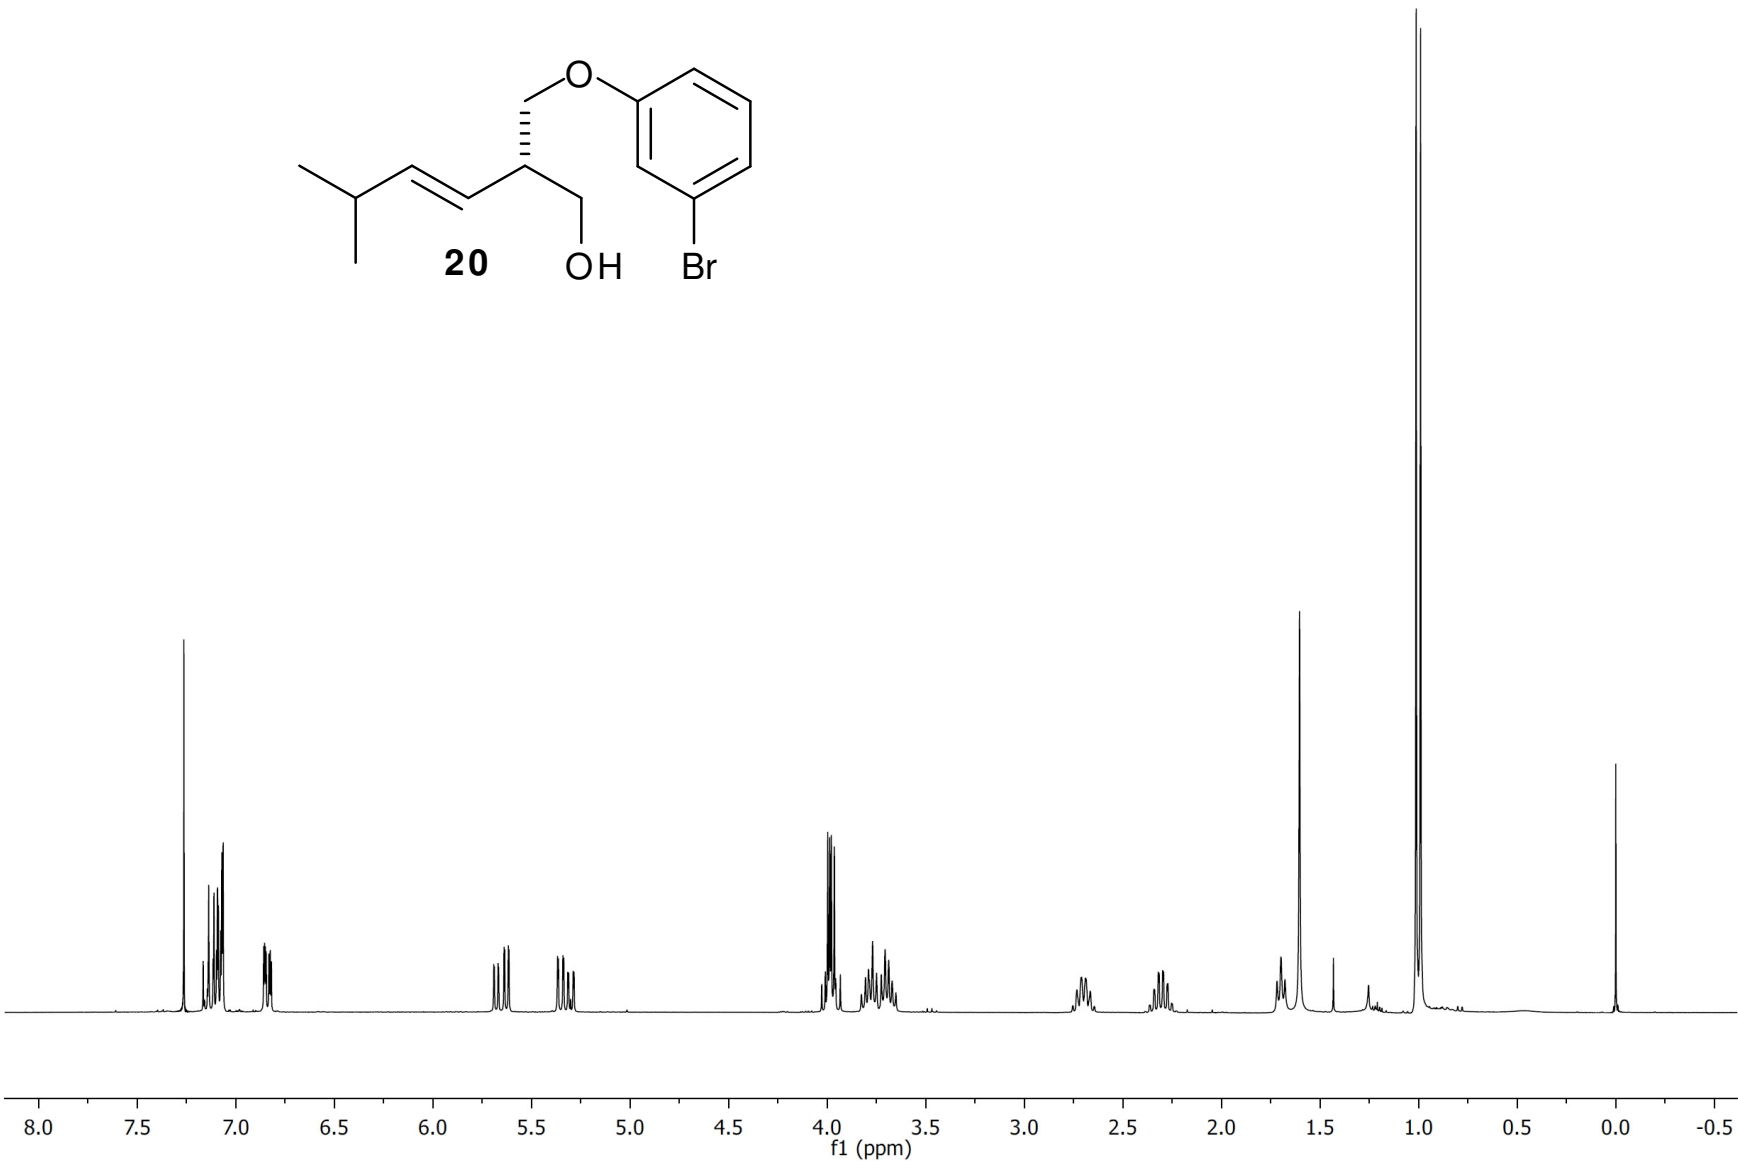



<sup>13</sup>C NMR of compound **20**

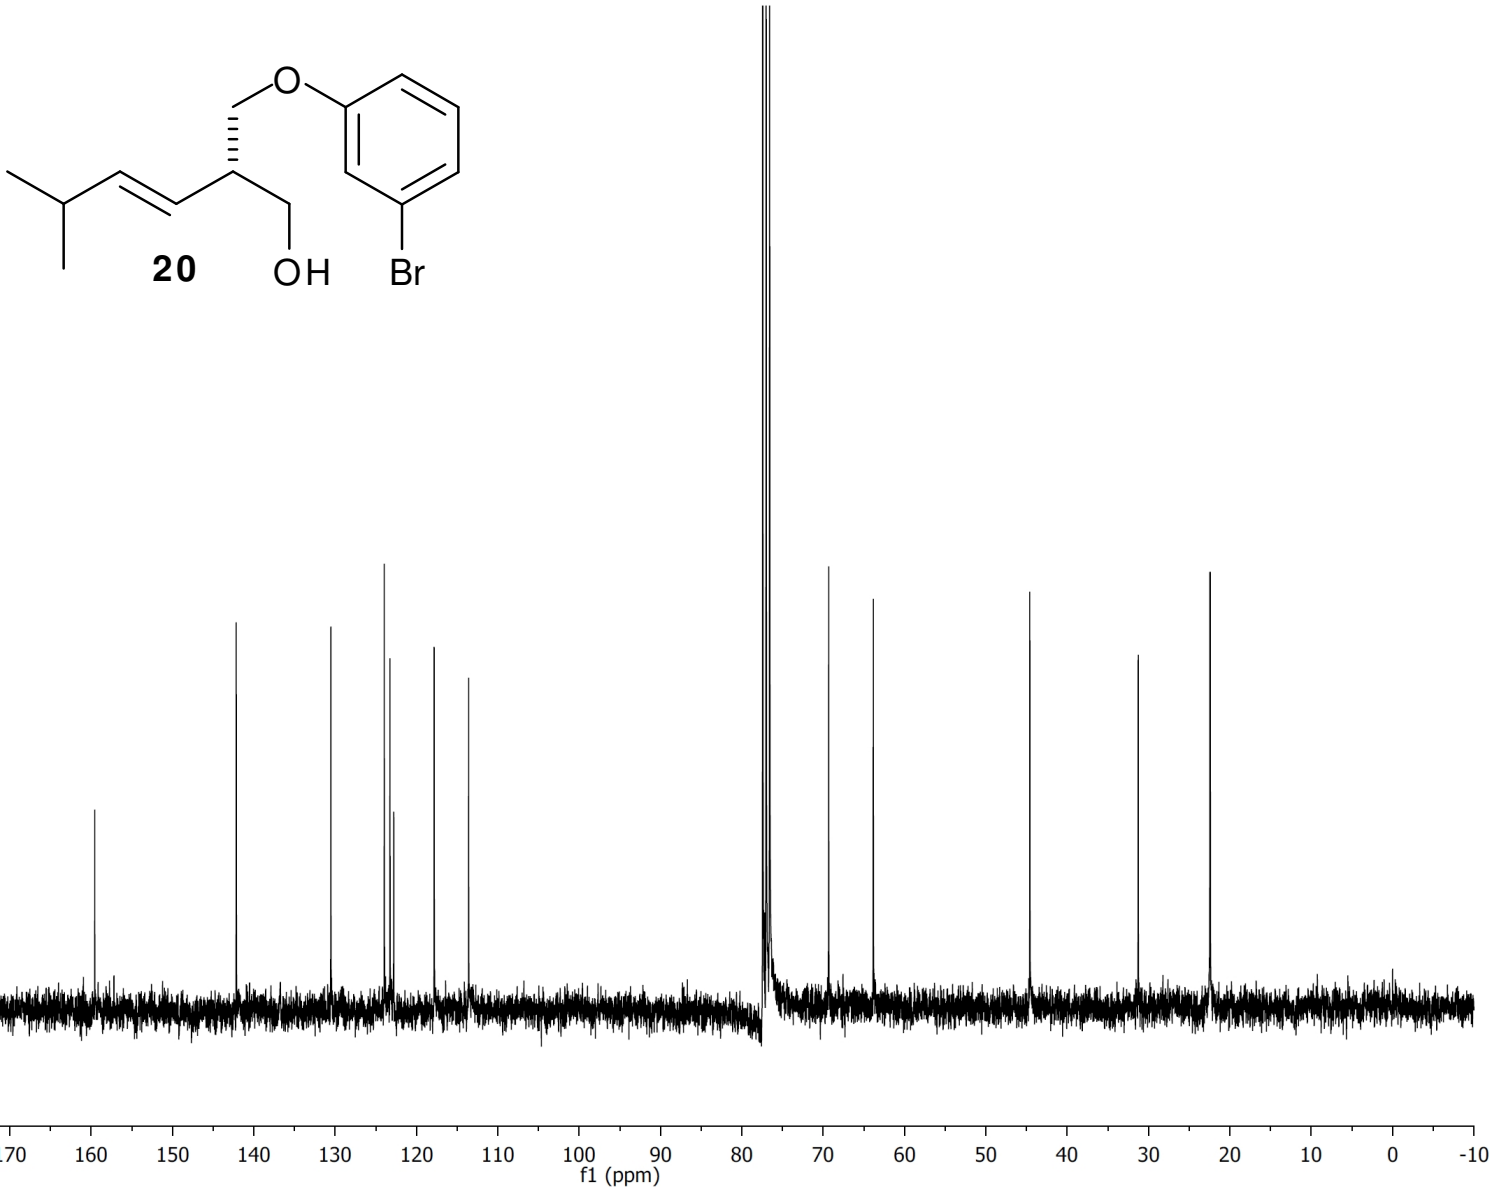

<sup>1</sup>H NMR of compound **21**

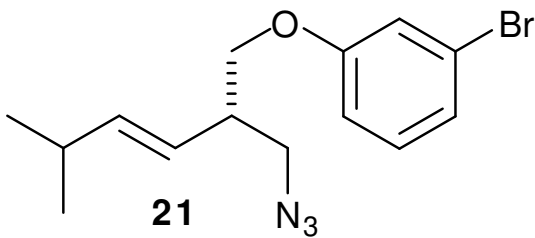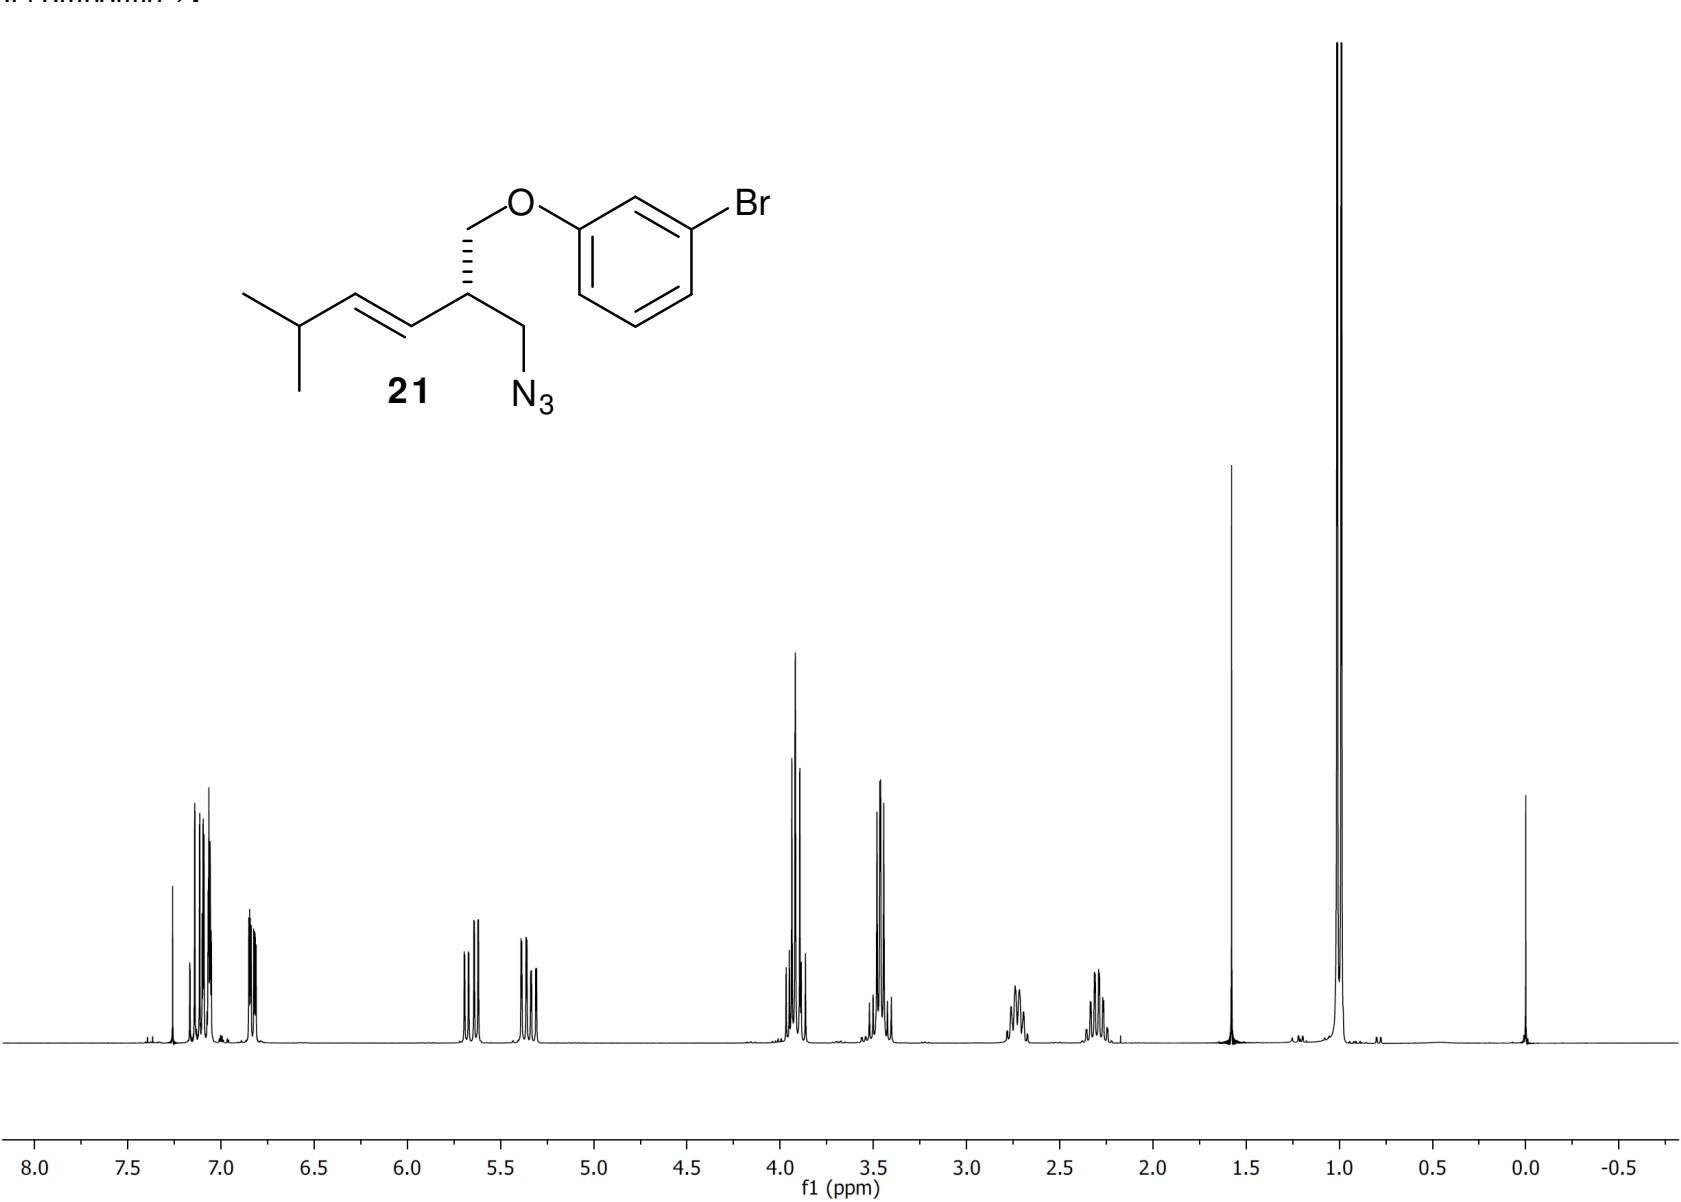

<sup>13</sup>C NMR of compound **21**

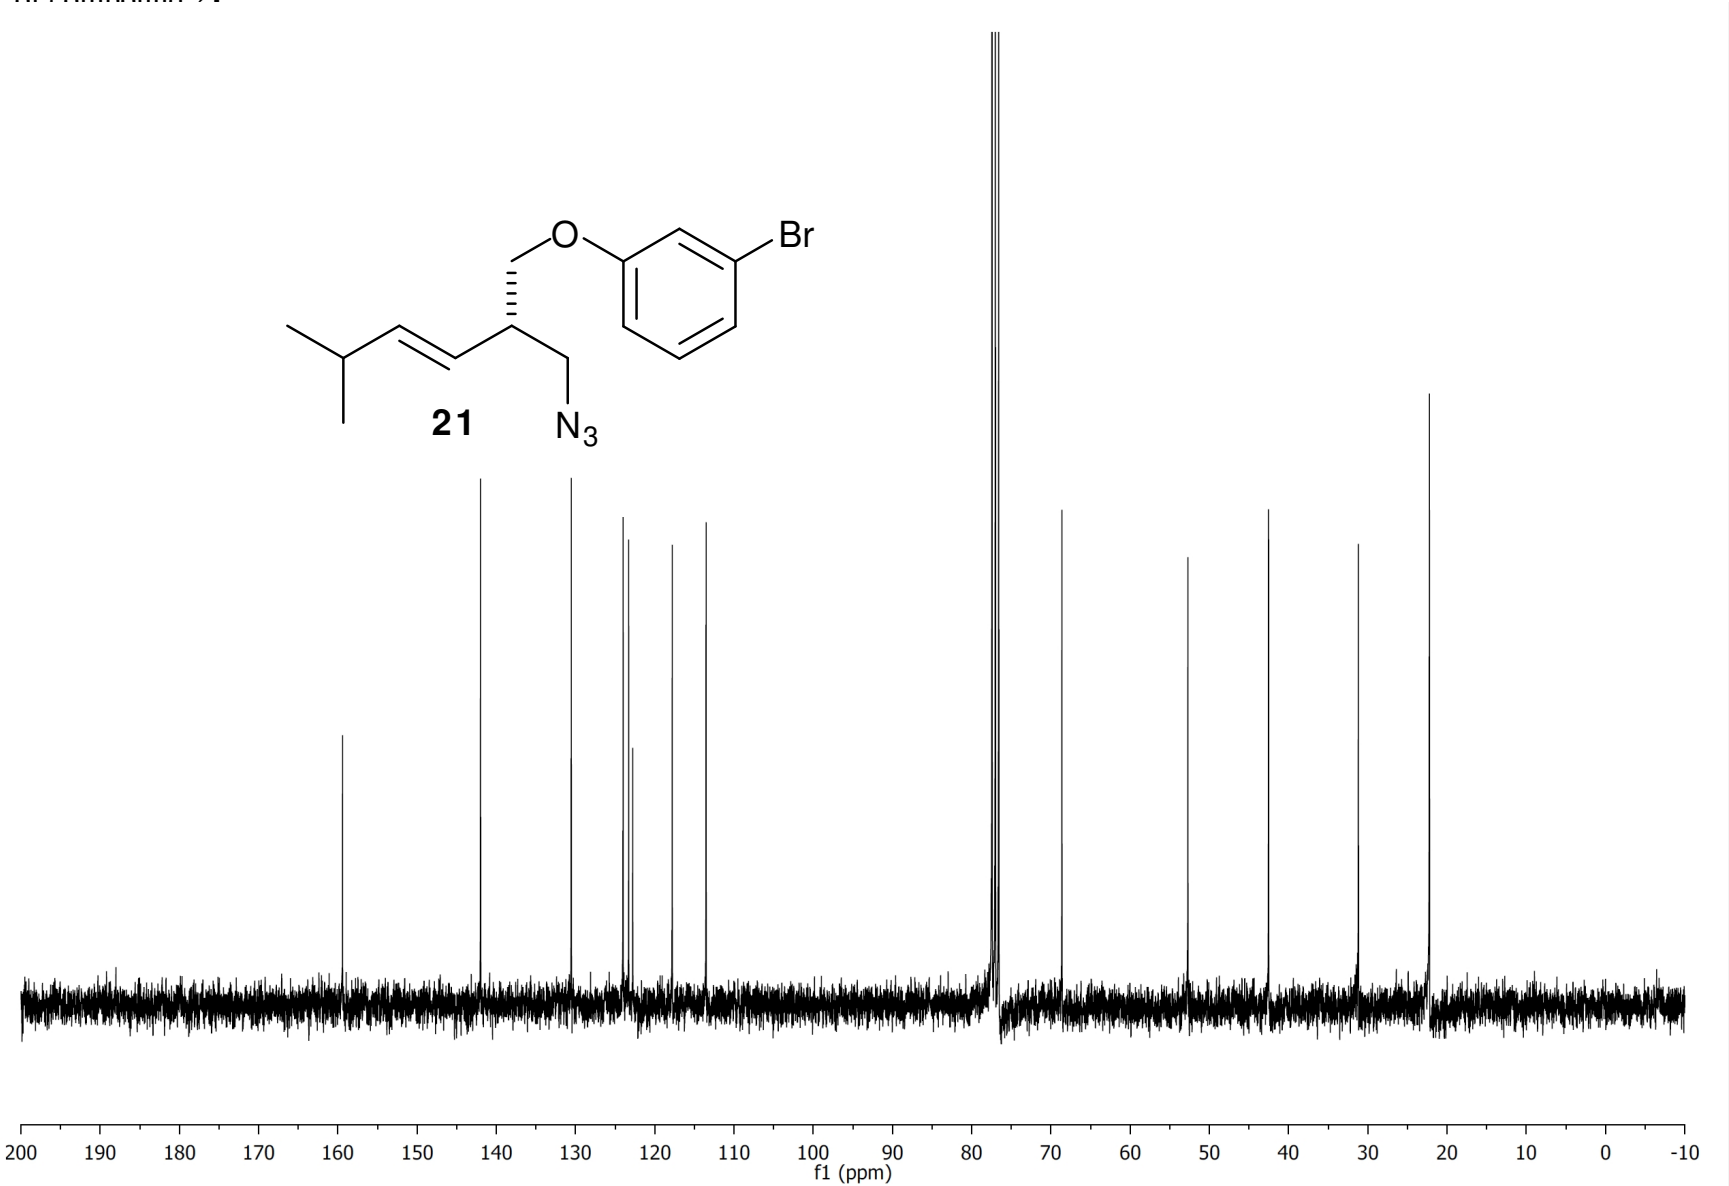

<sup>1</sup>H NMR of compound 22

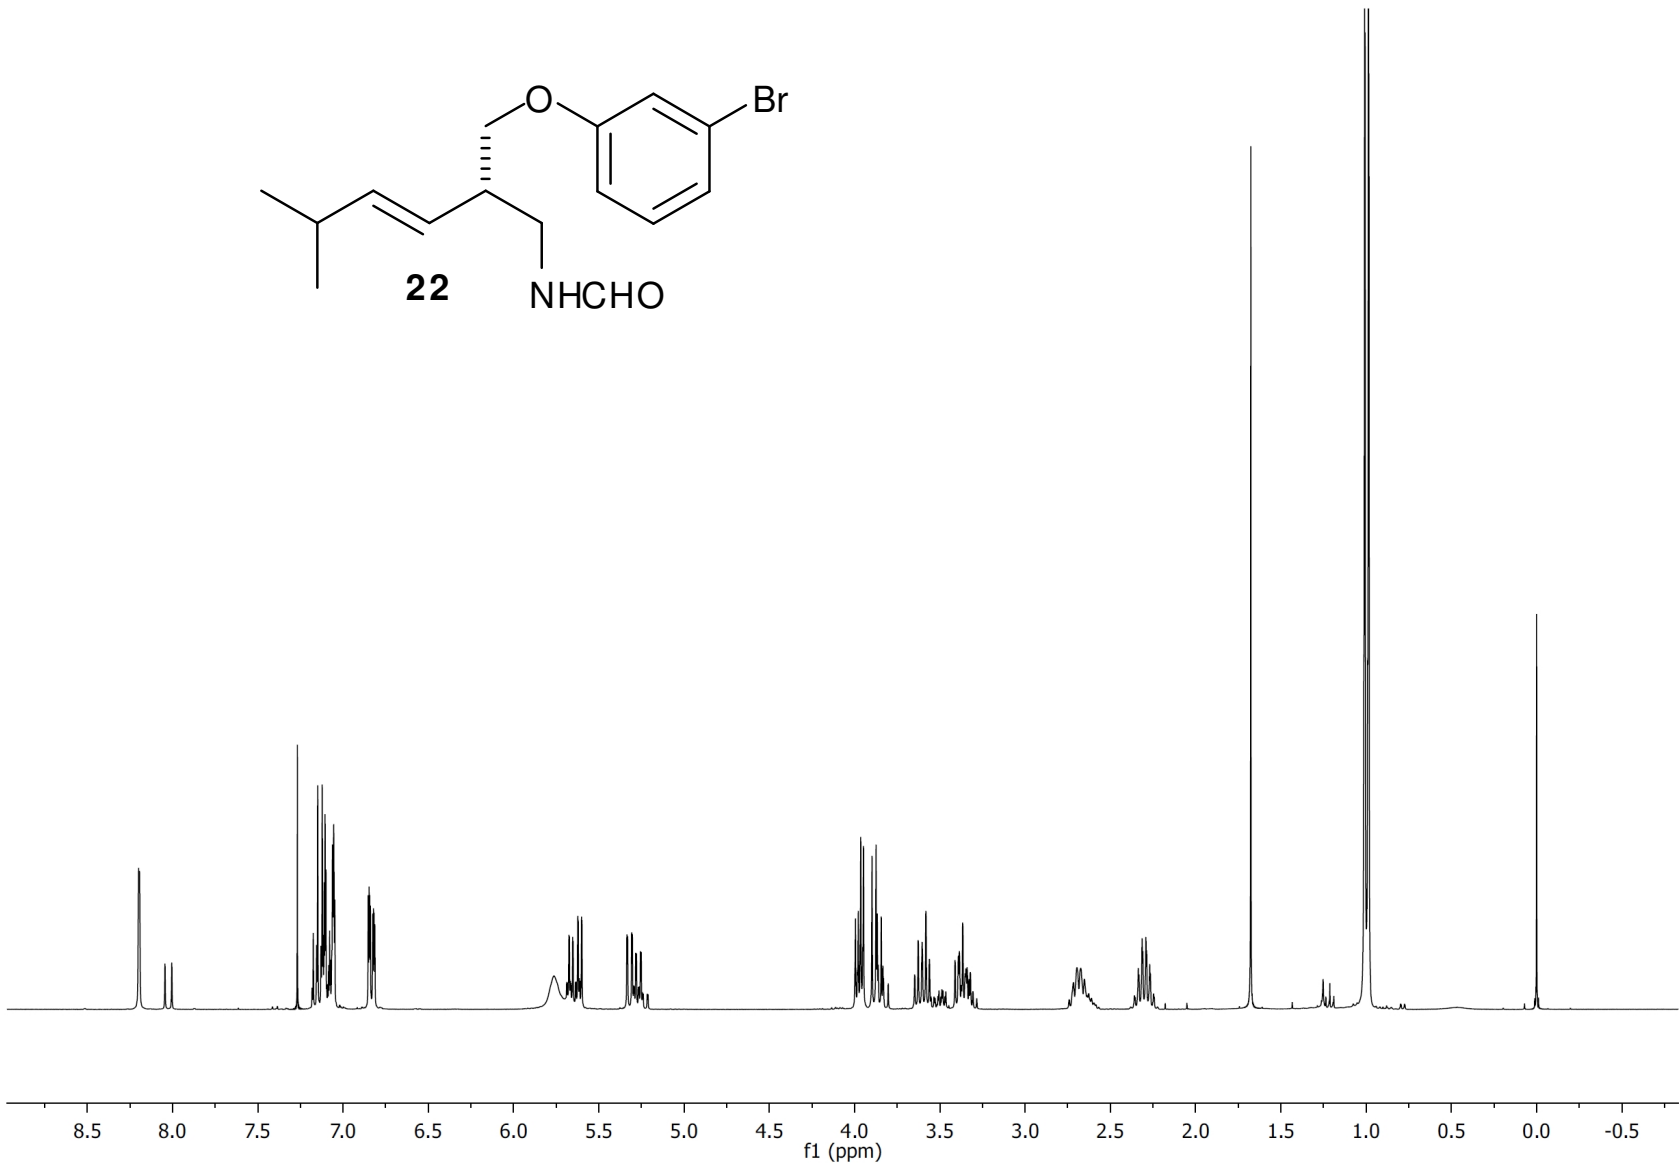

<sup>13</sup>C NMR of compound **22**

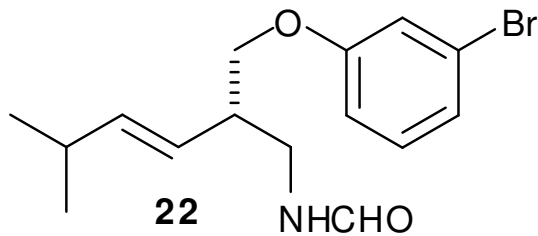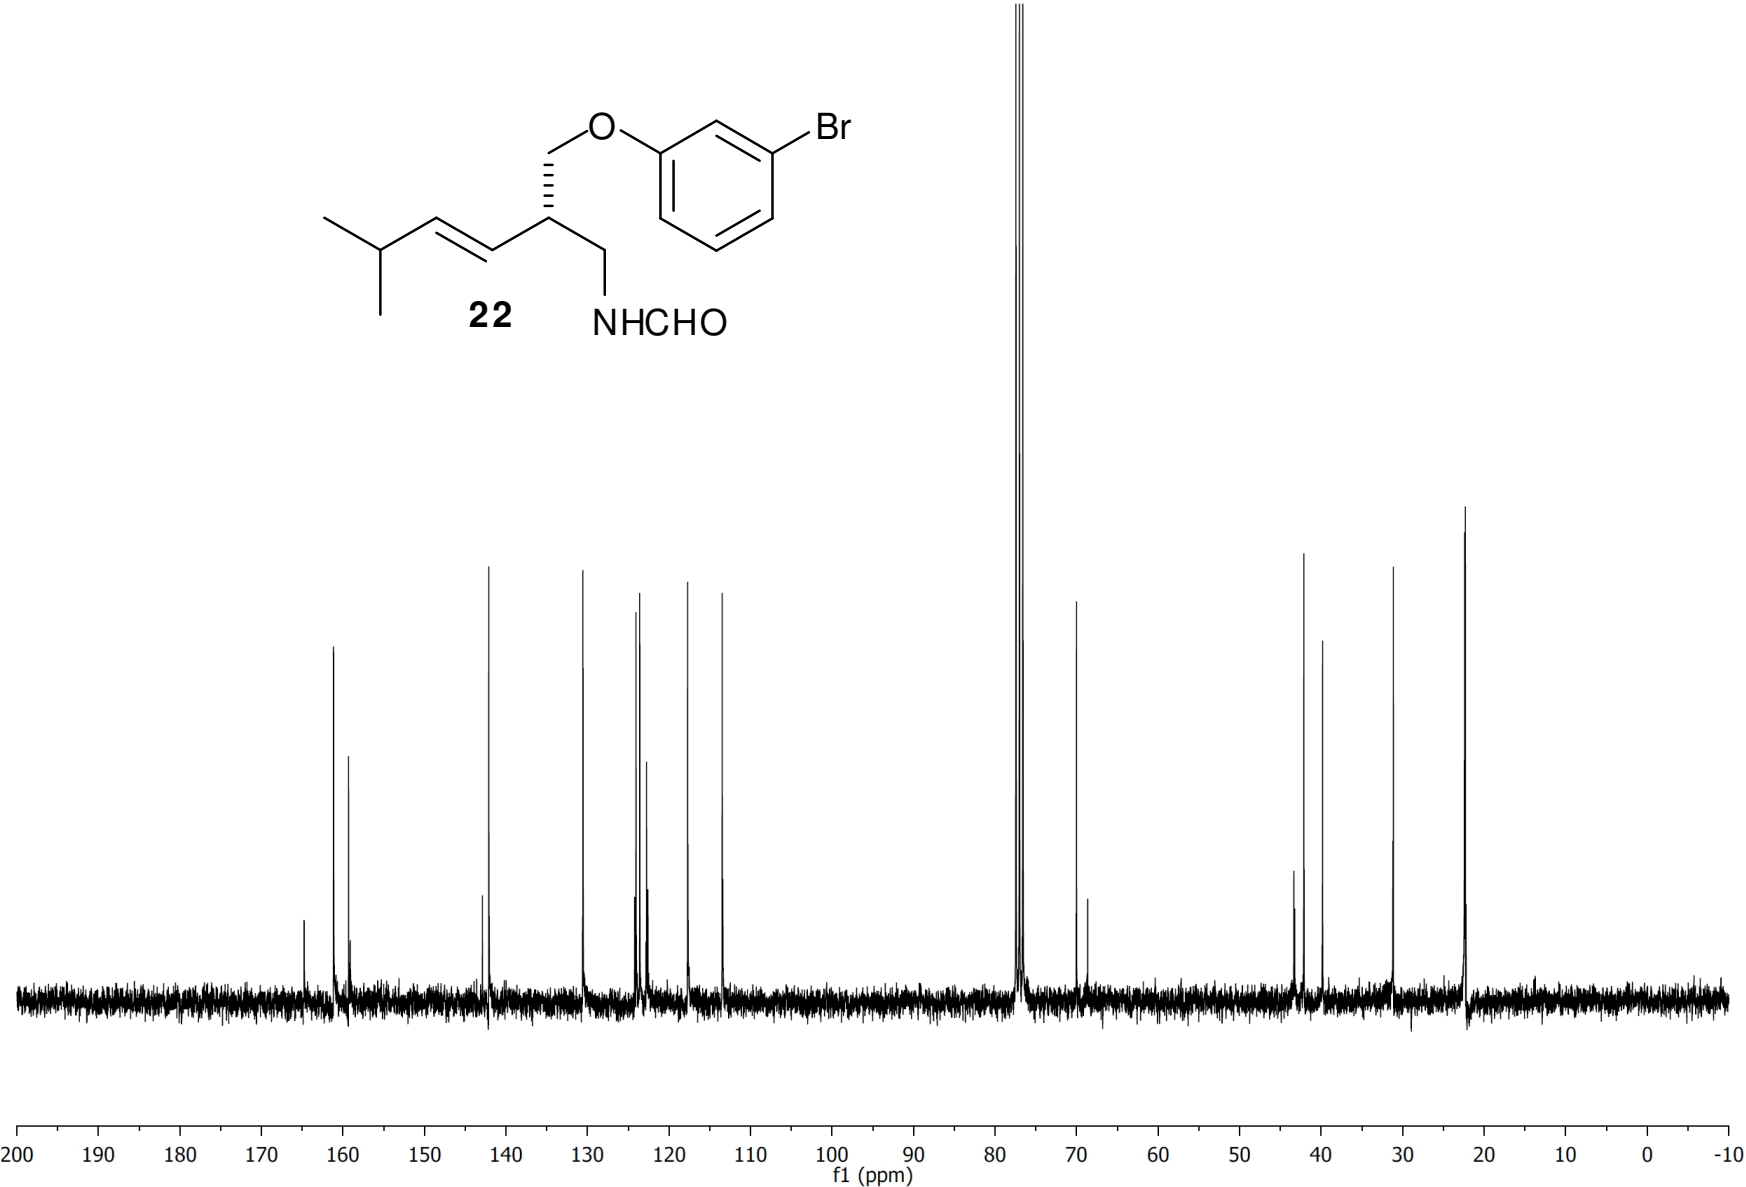

<sup>1</sup>H NMR of compound 23

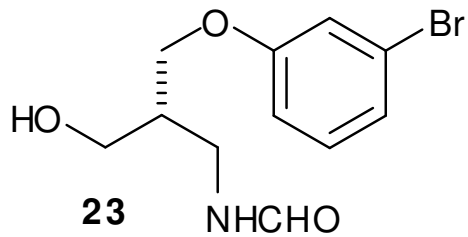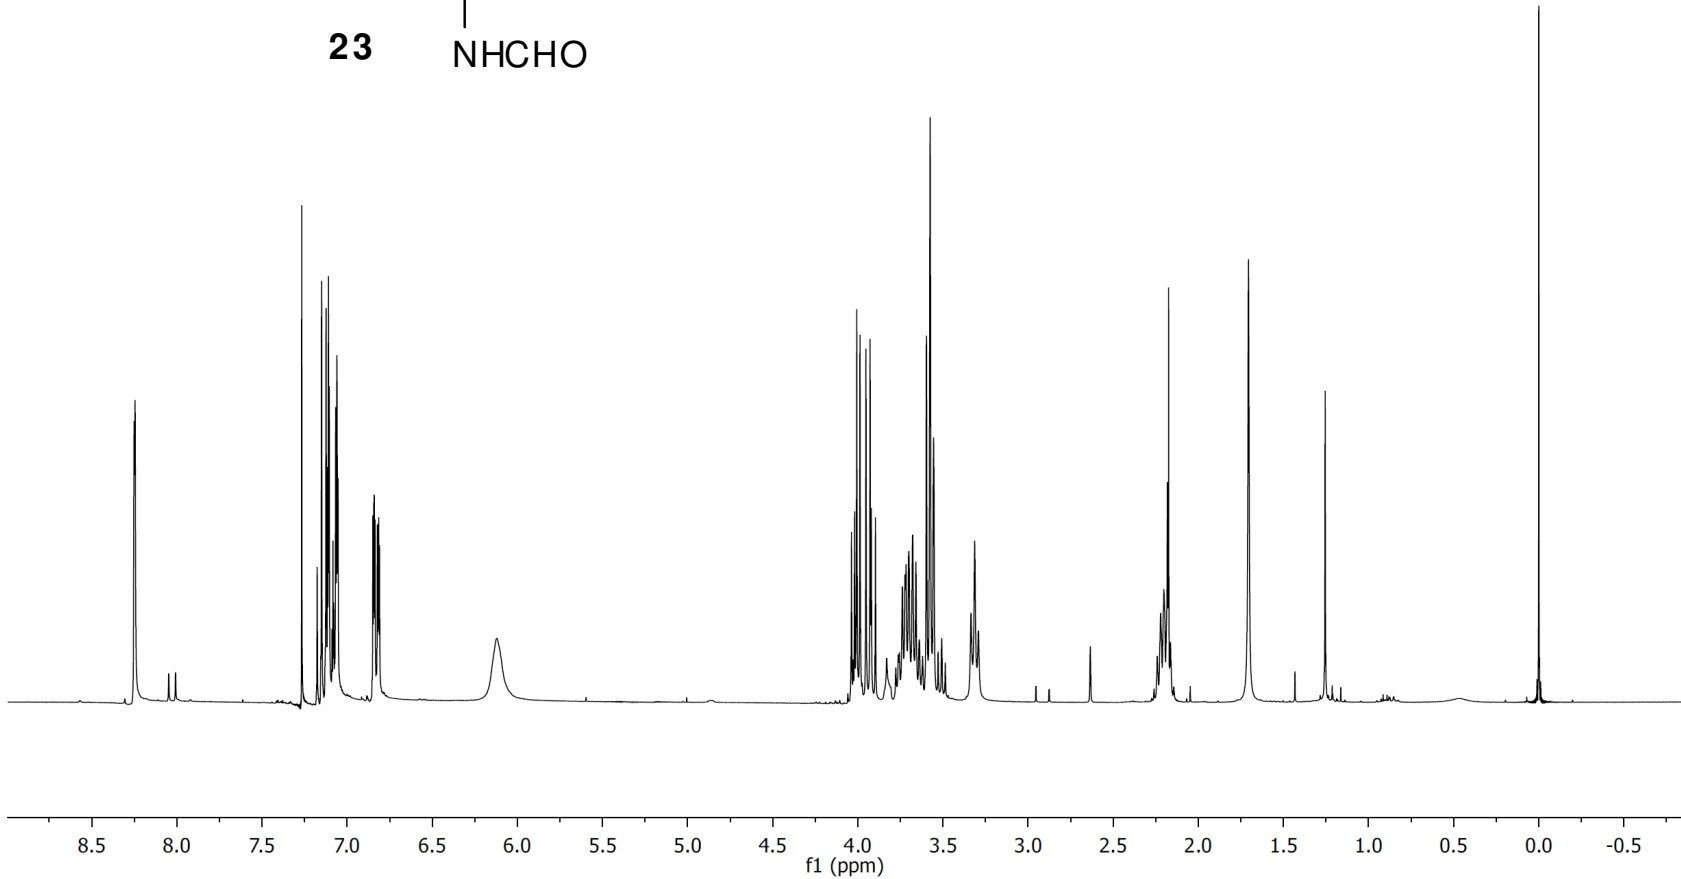

<sup>13</sup>C NMR of compound **23**

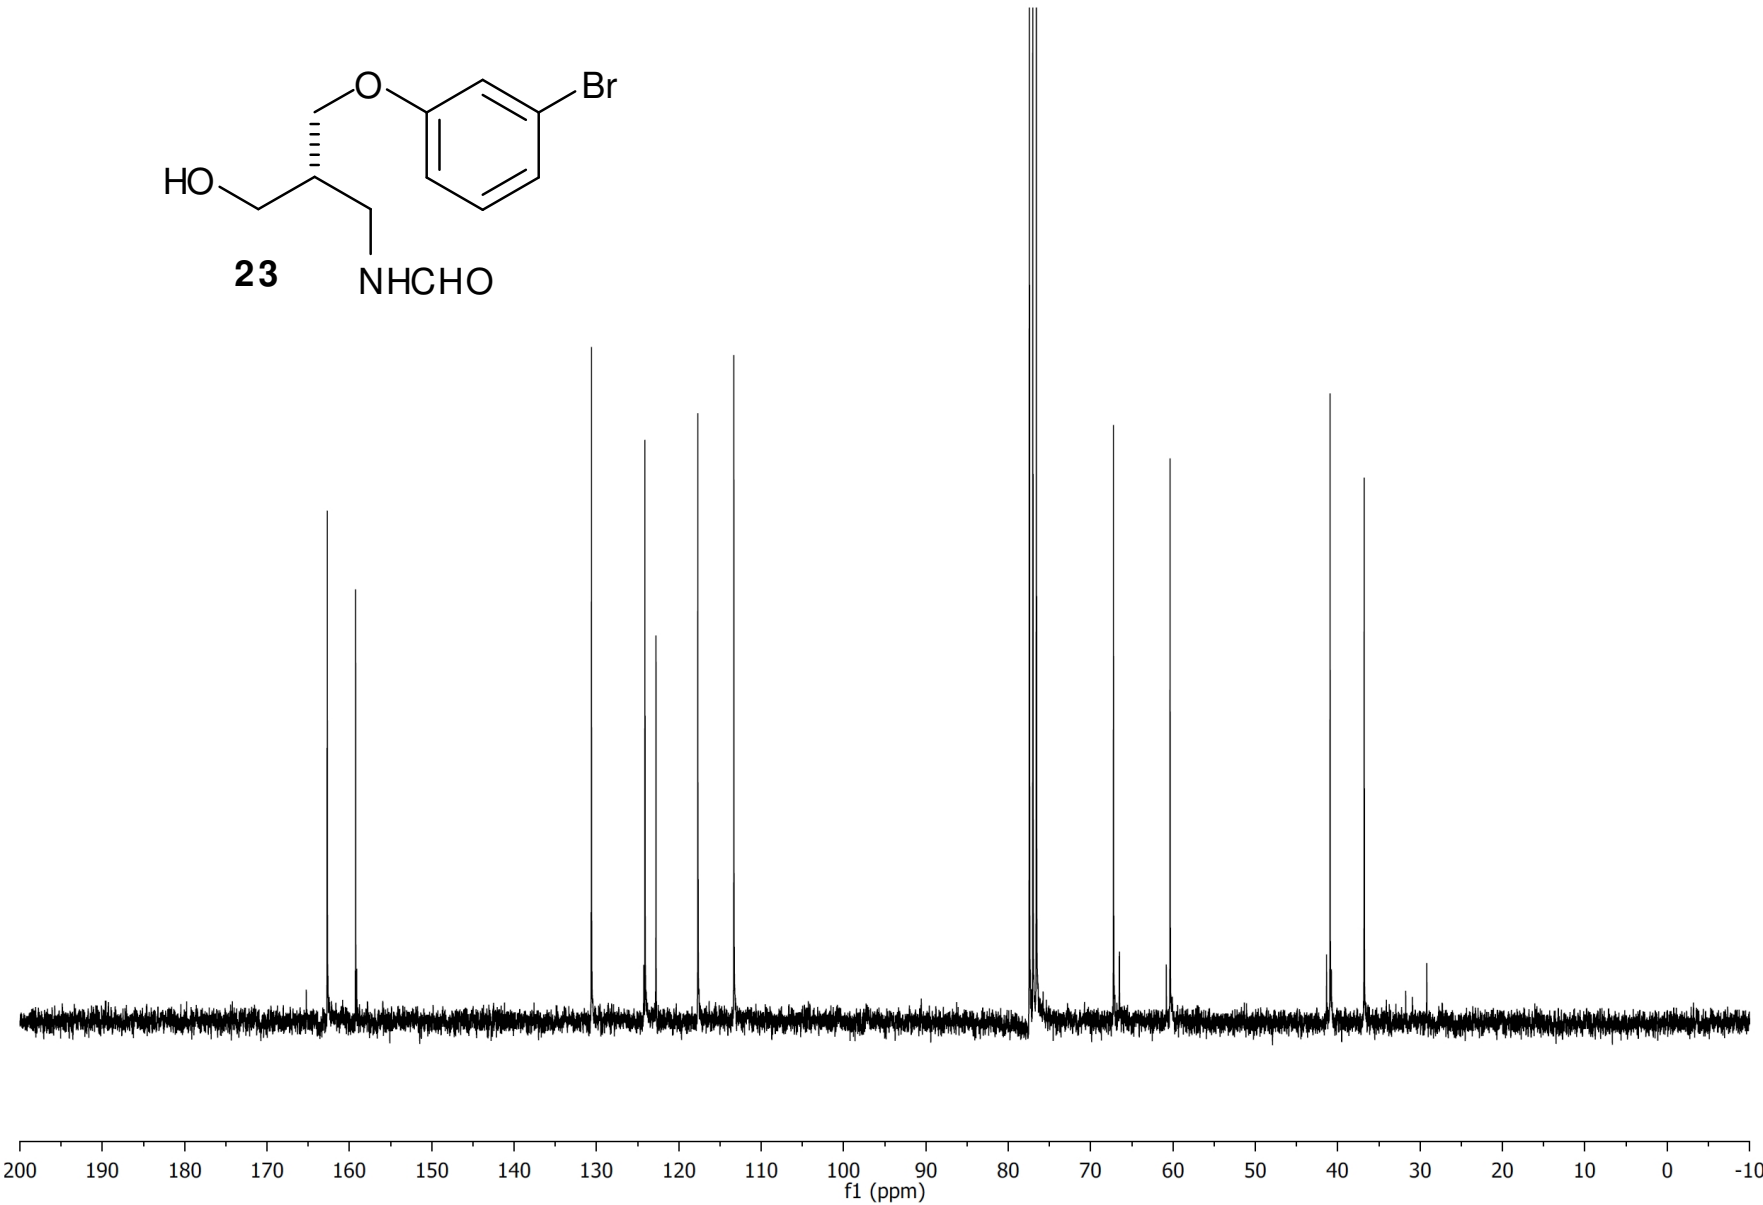

<sup>1</sup>H NMR of compound **24**

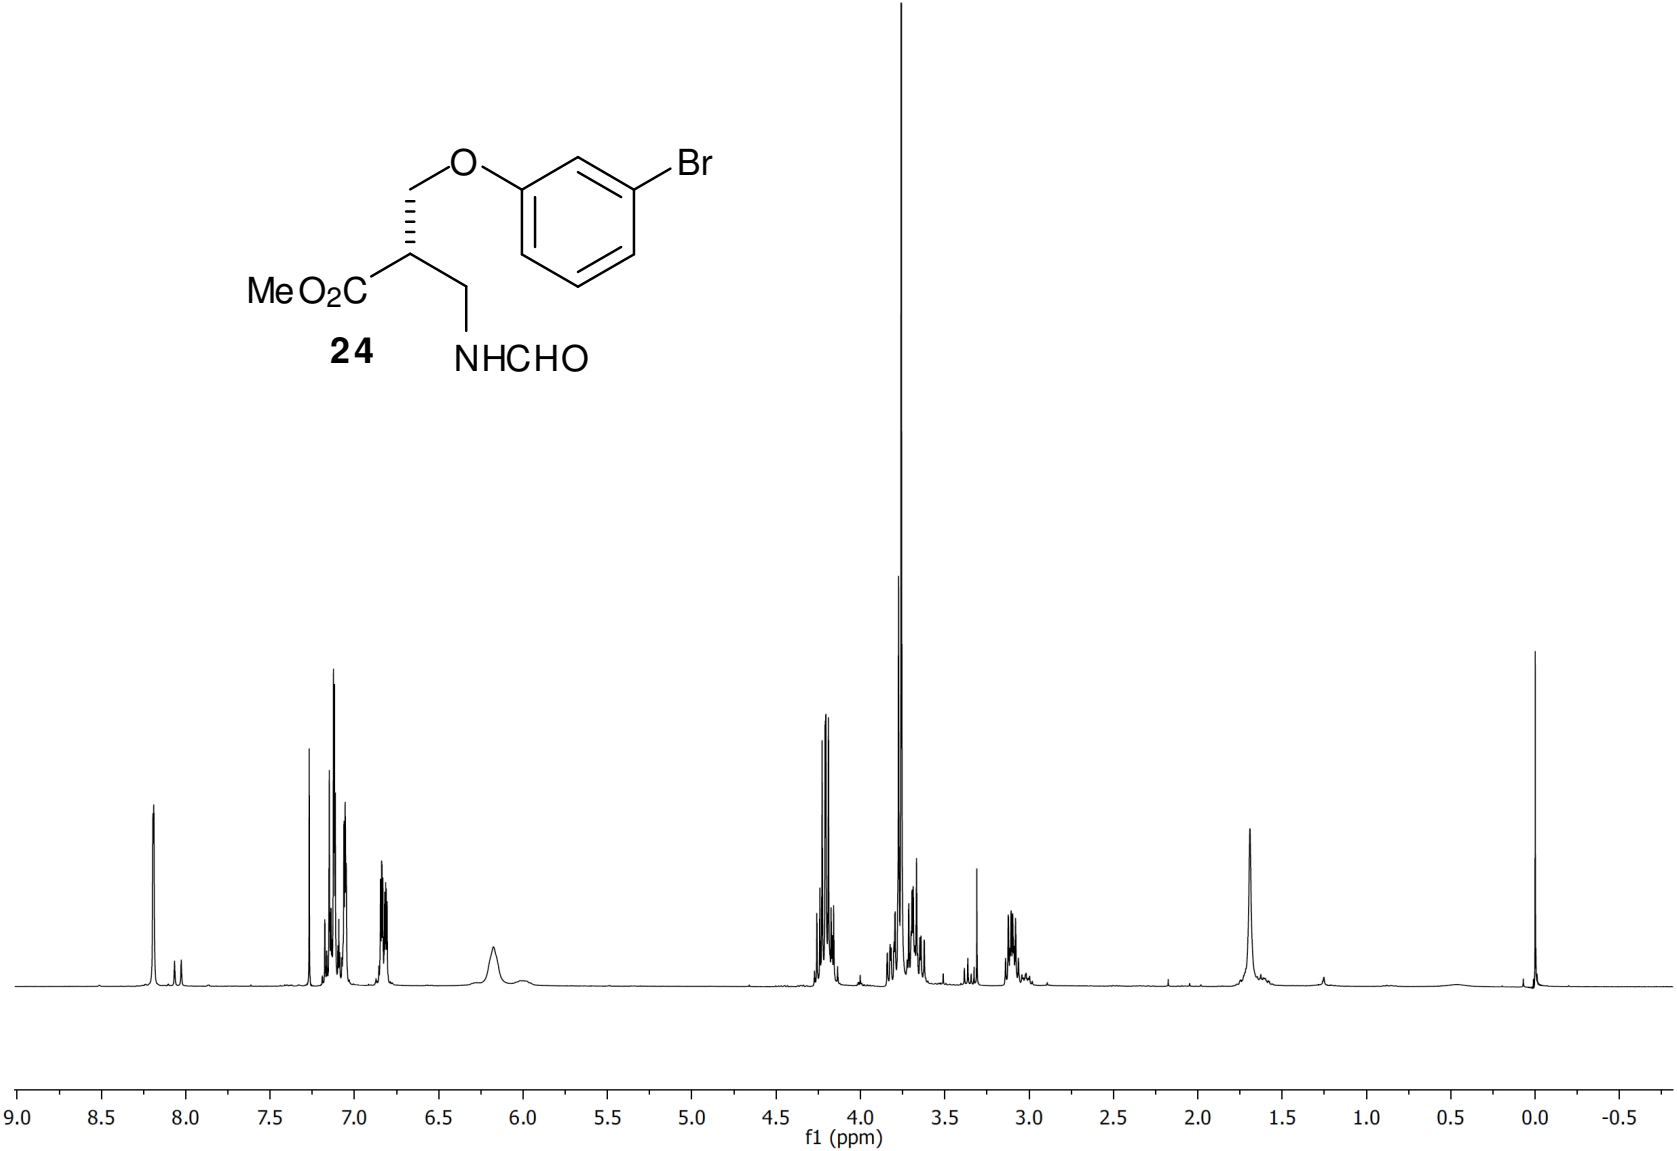



<sup>13</sup>C NMR of compound **24**

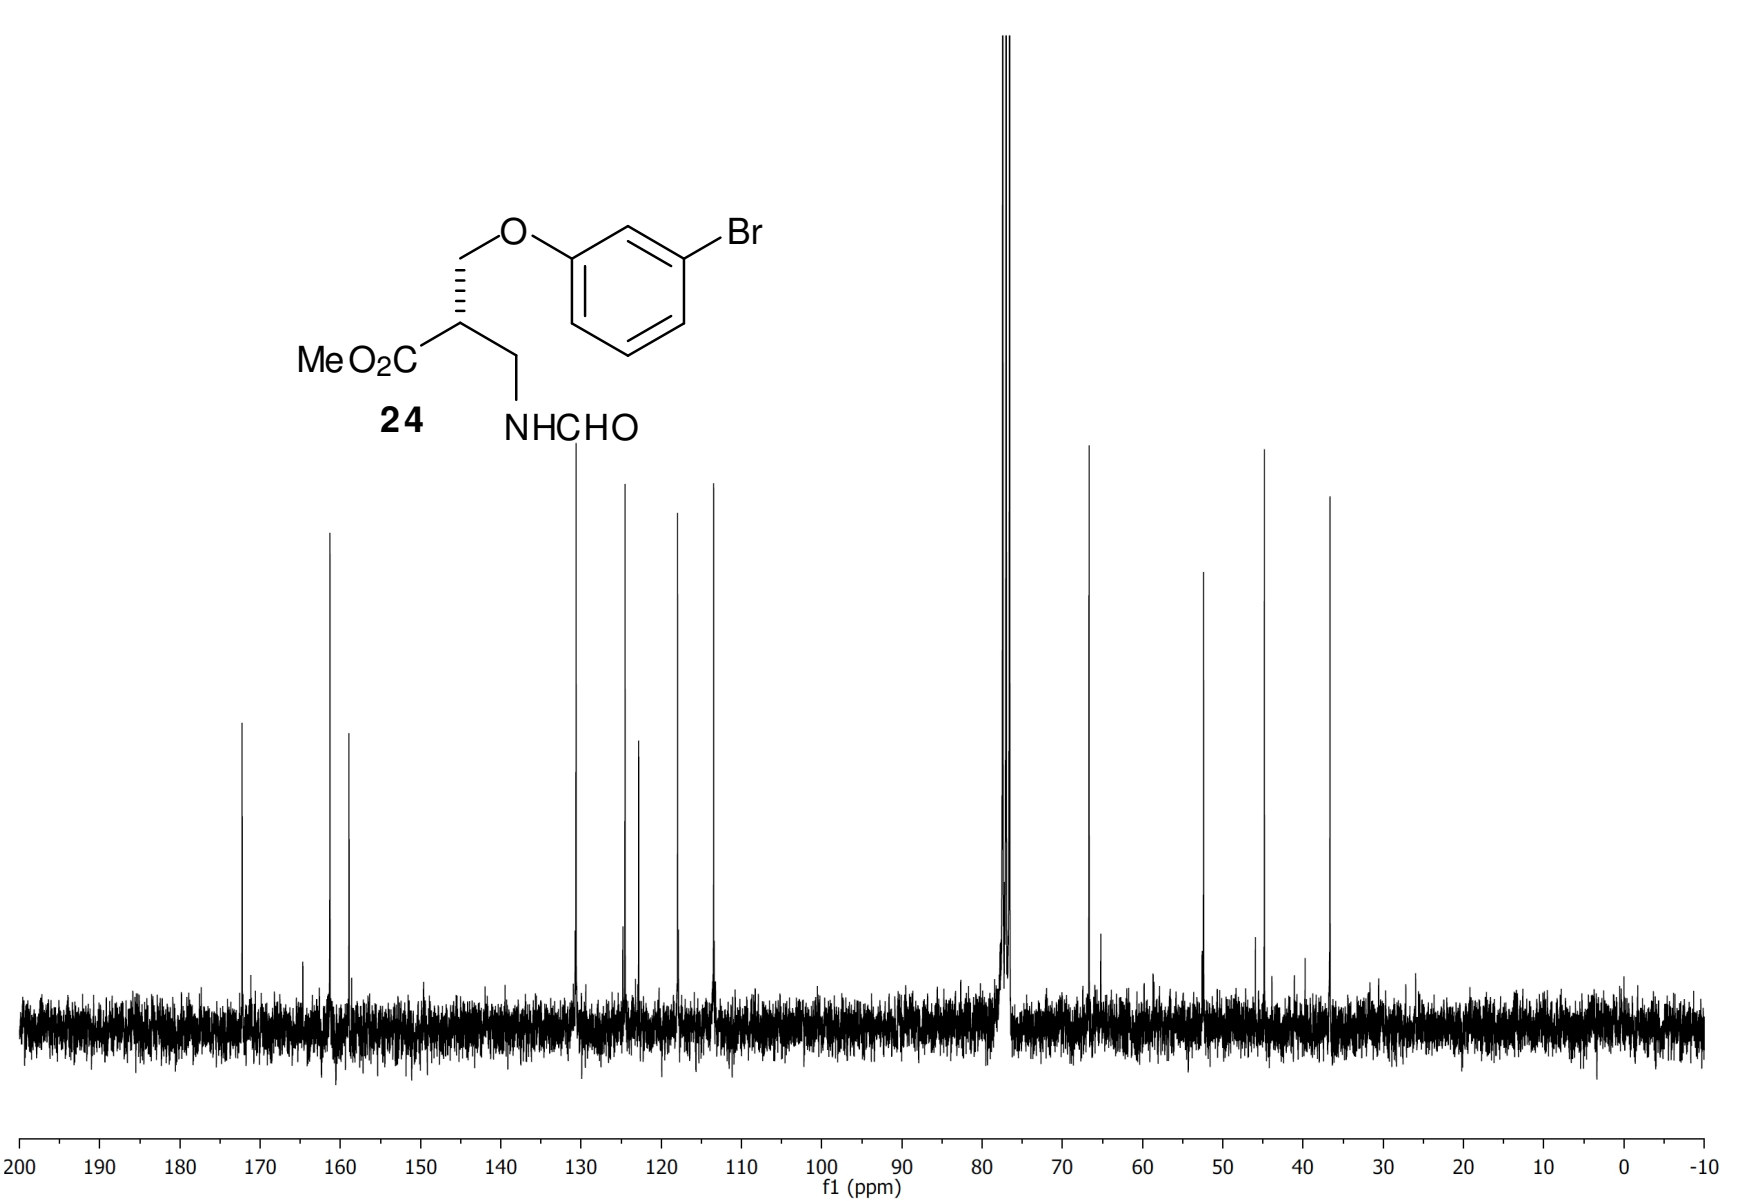

<sup>1</sup>H NMR of compound **27**

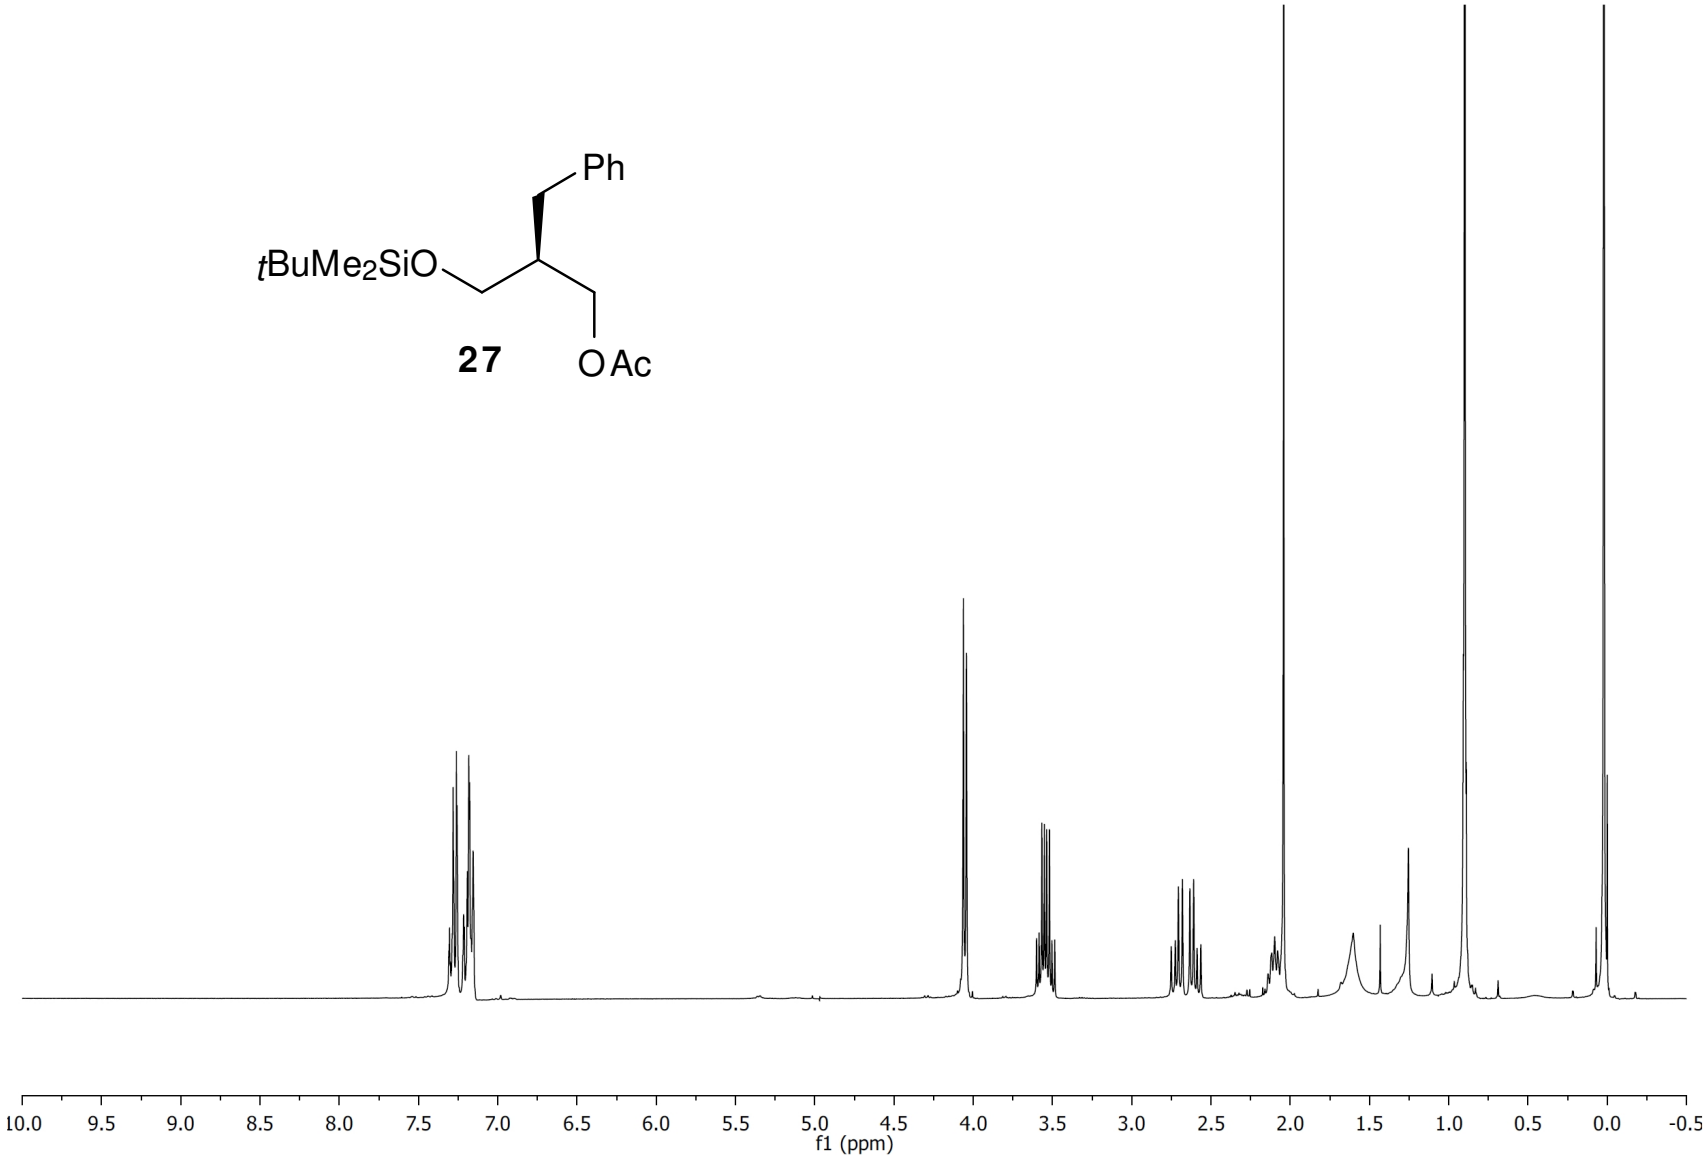

<sup>13</sup>C NMR of compound **27**

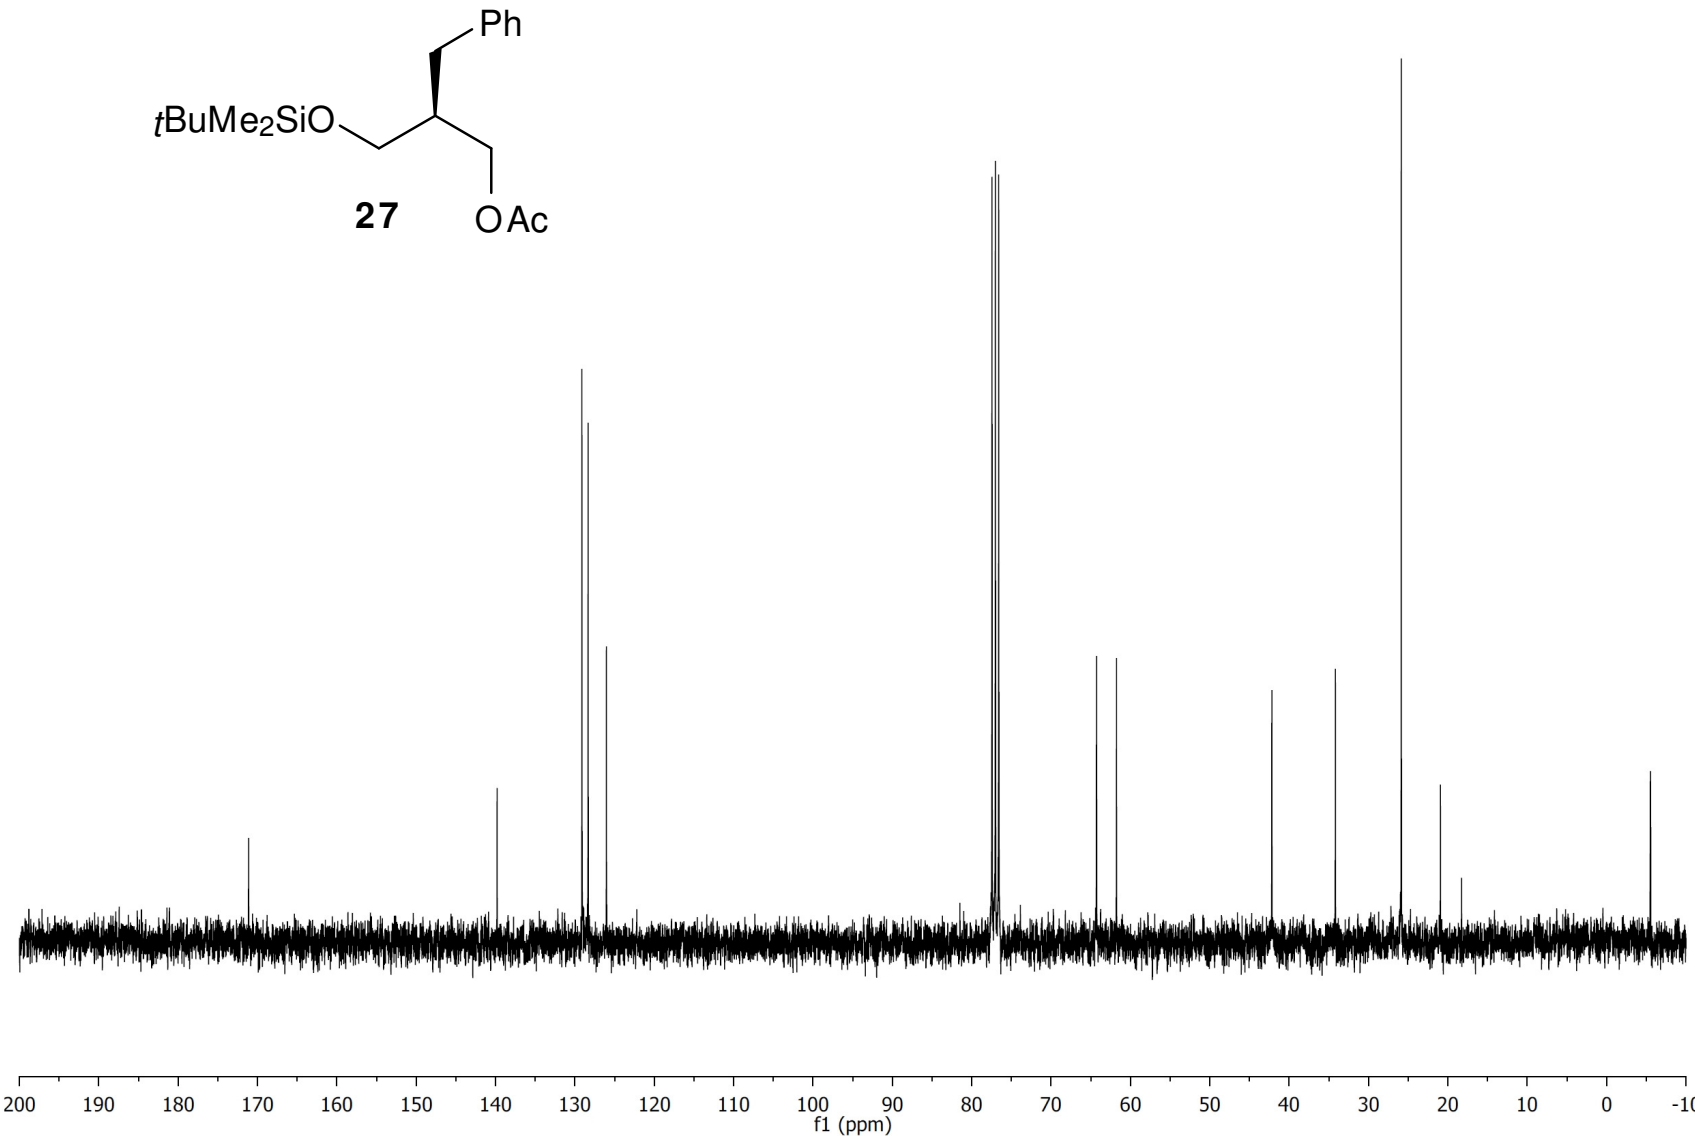

<sup>1</sup>H NMR of compound **28**

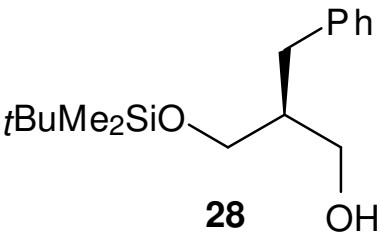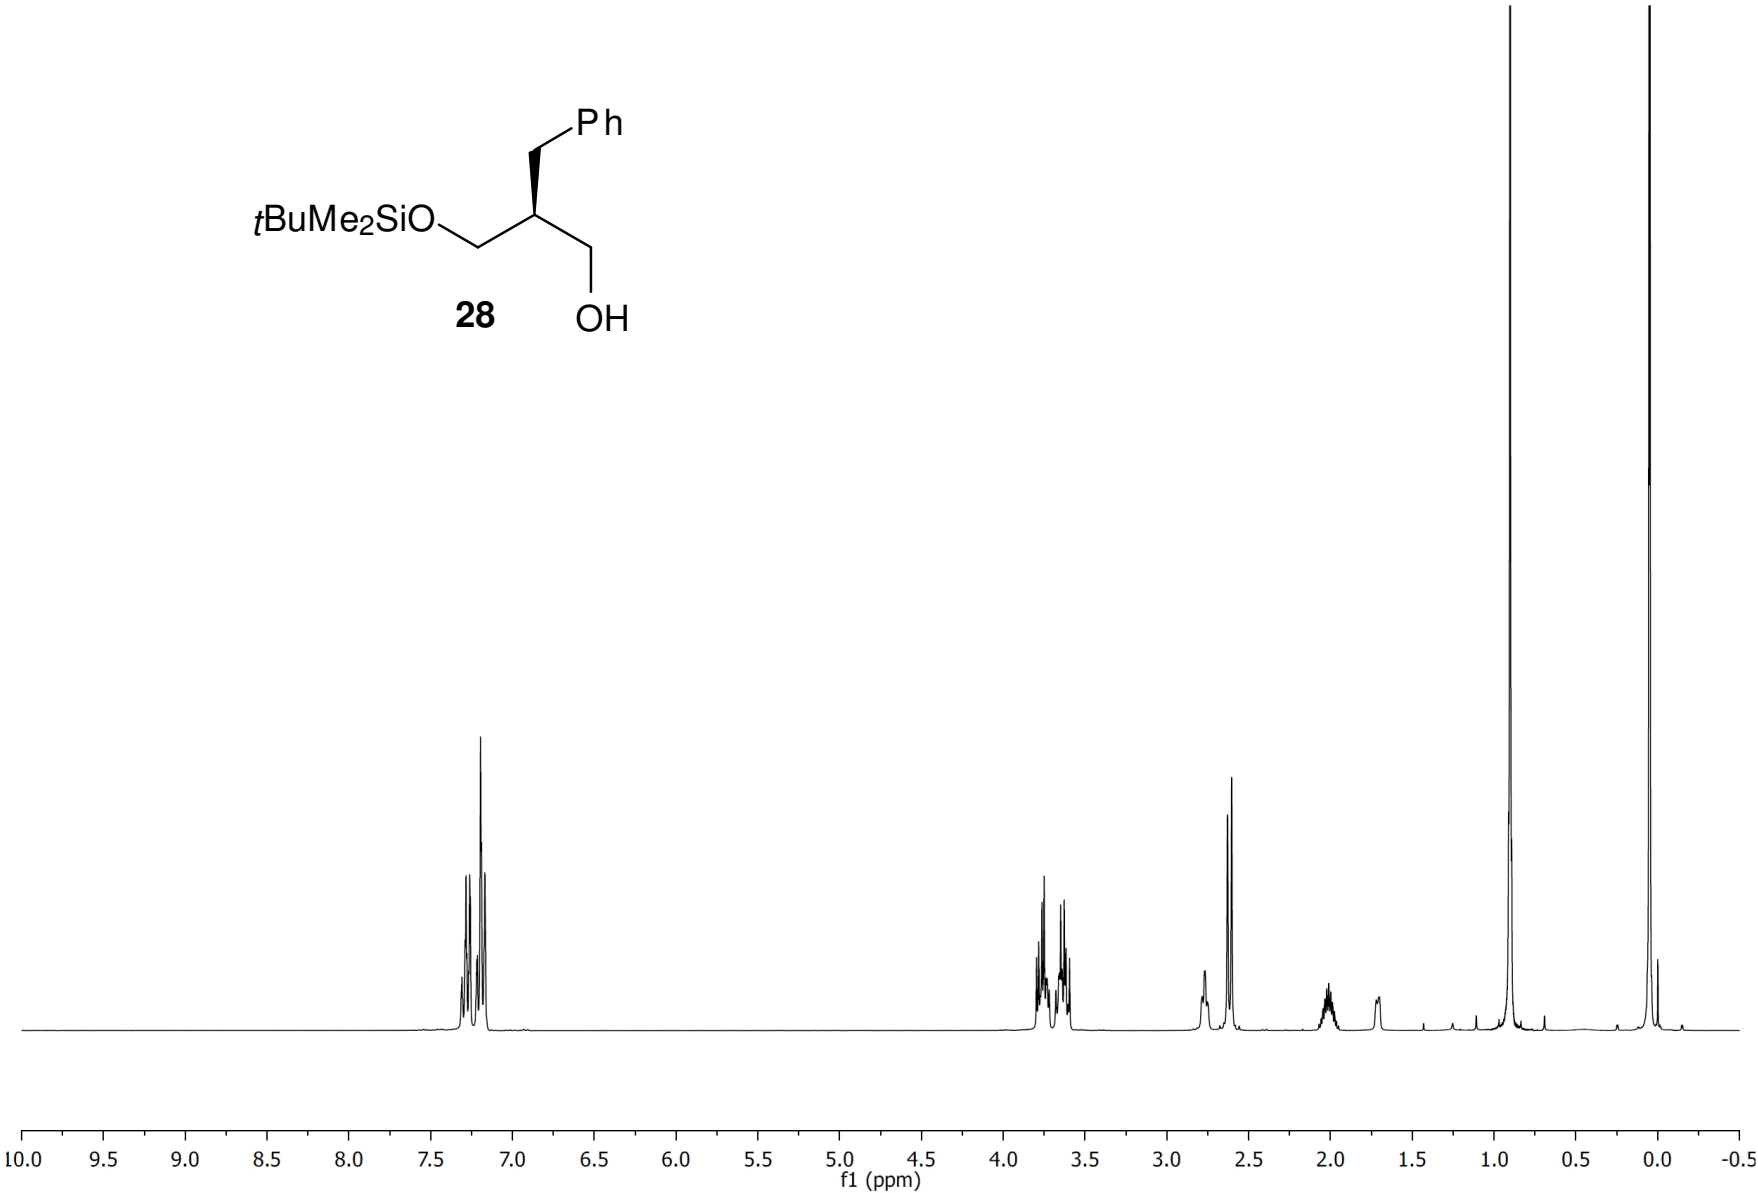

<sup>13</sup>C NMR of compound **28**

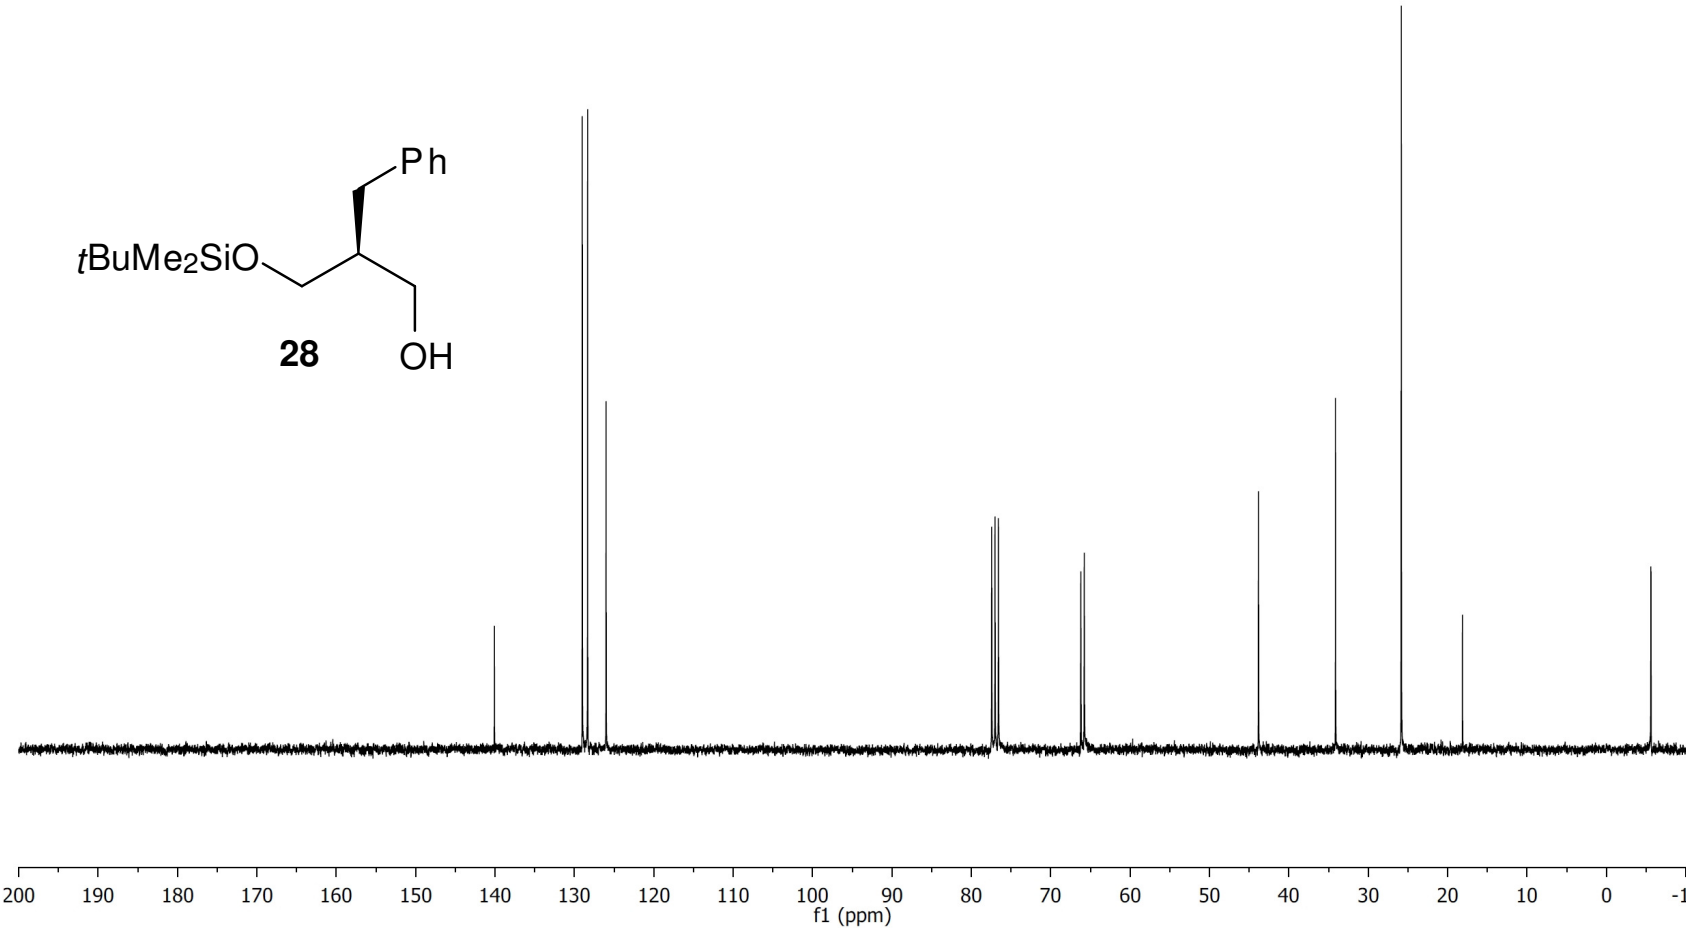

<sup>1</sup>H NMR of compound **20**

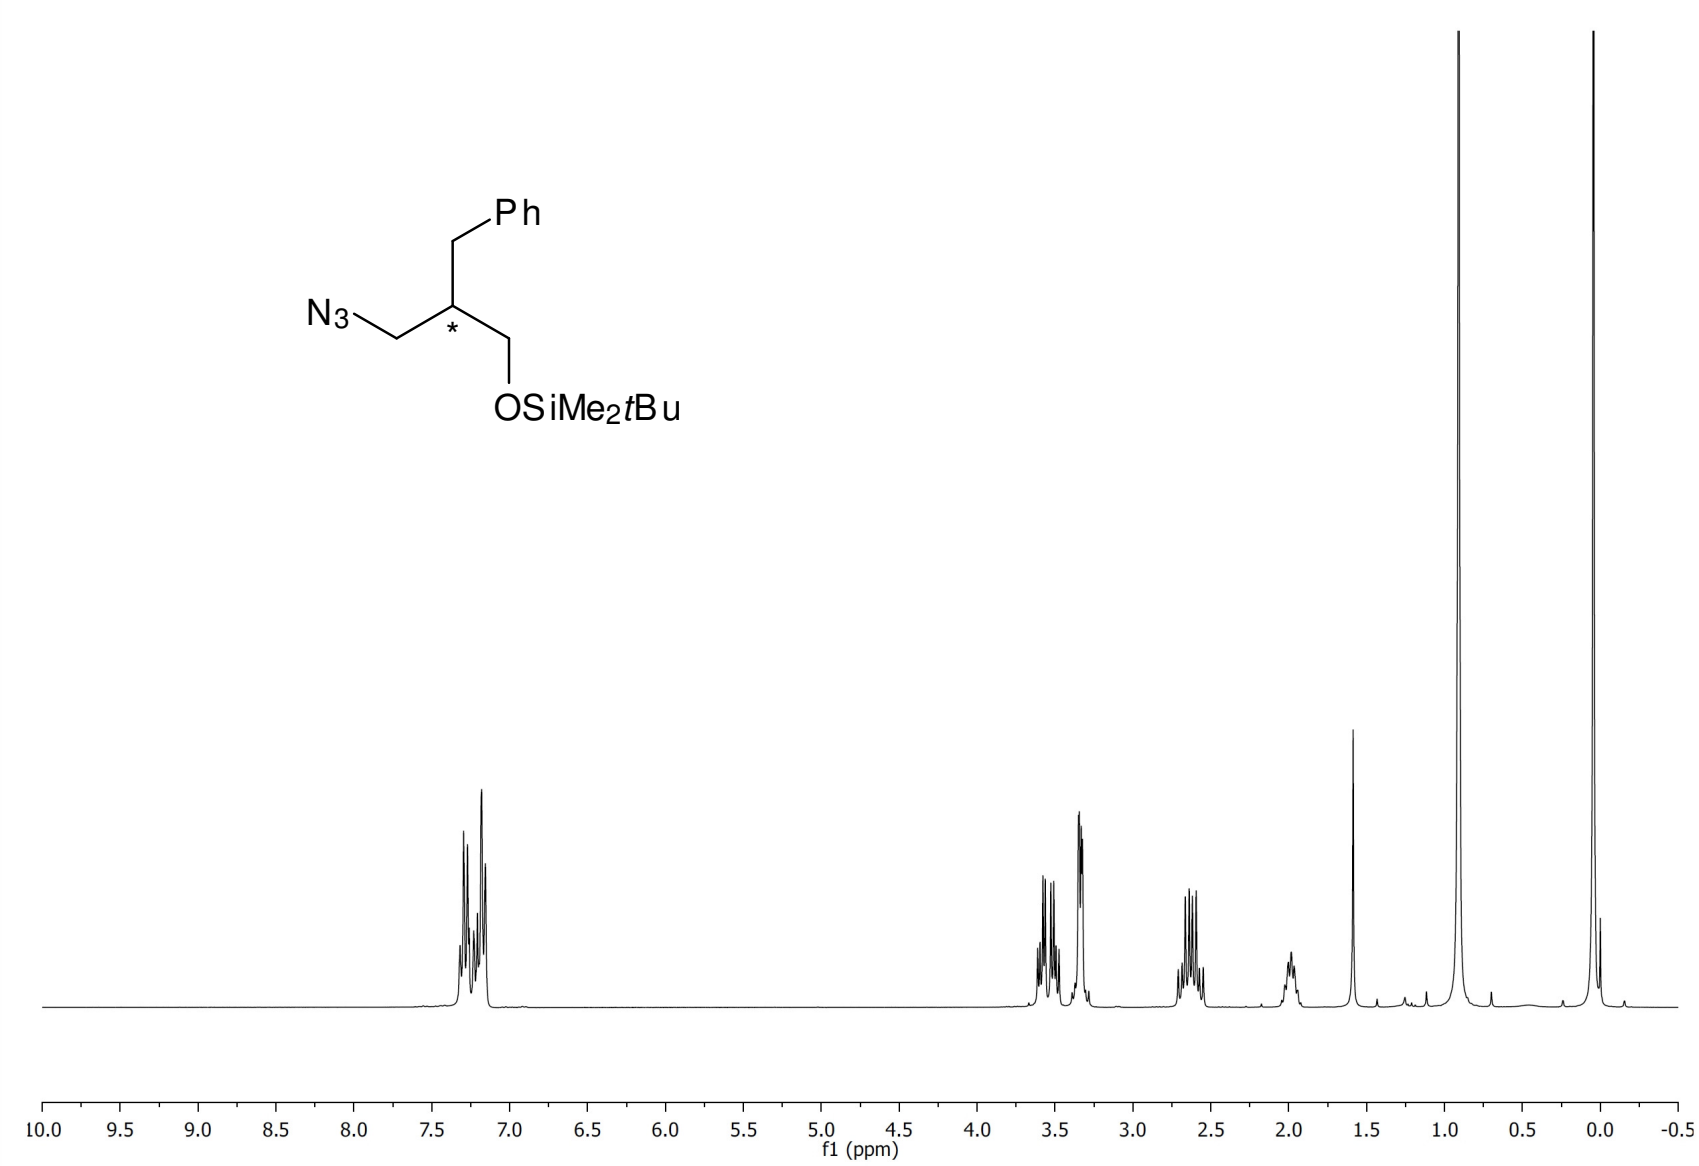

<sup>13</sup>C NMR of compound **20**

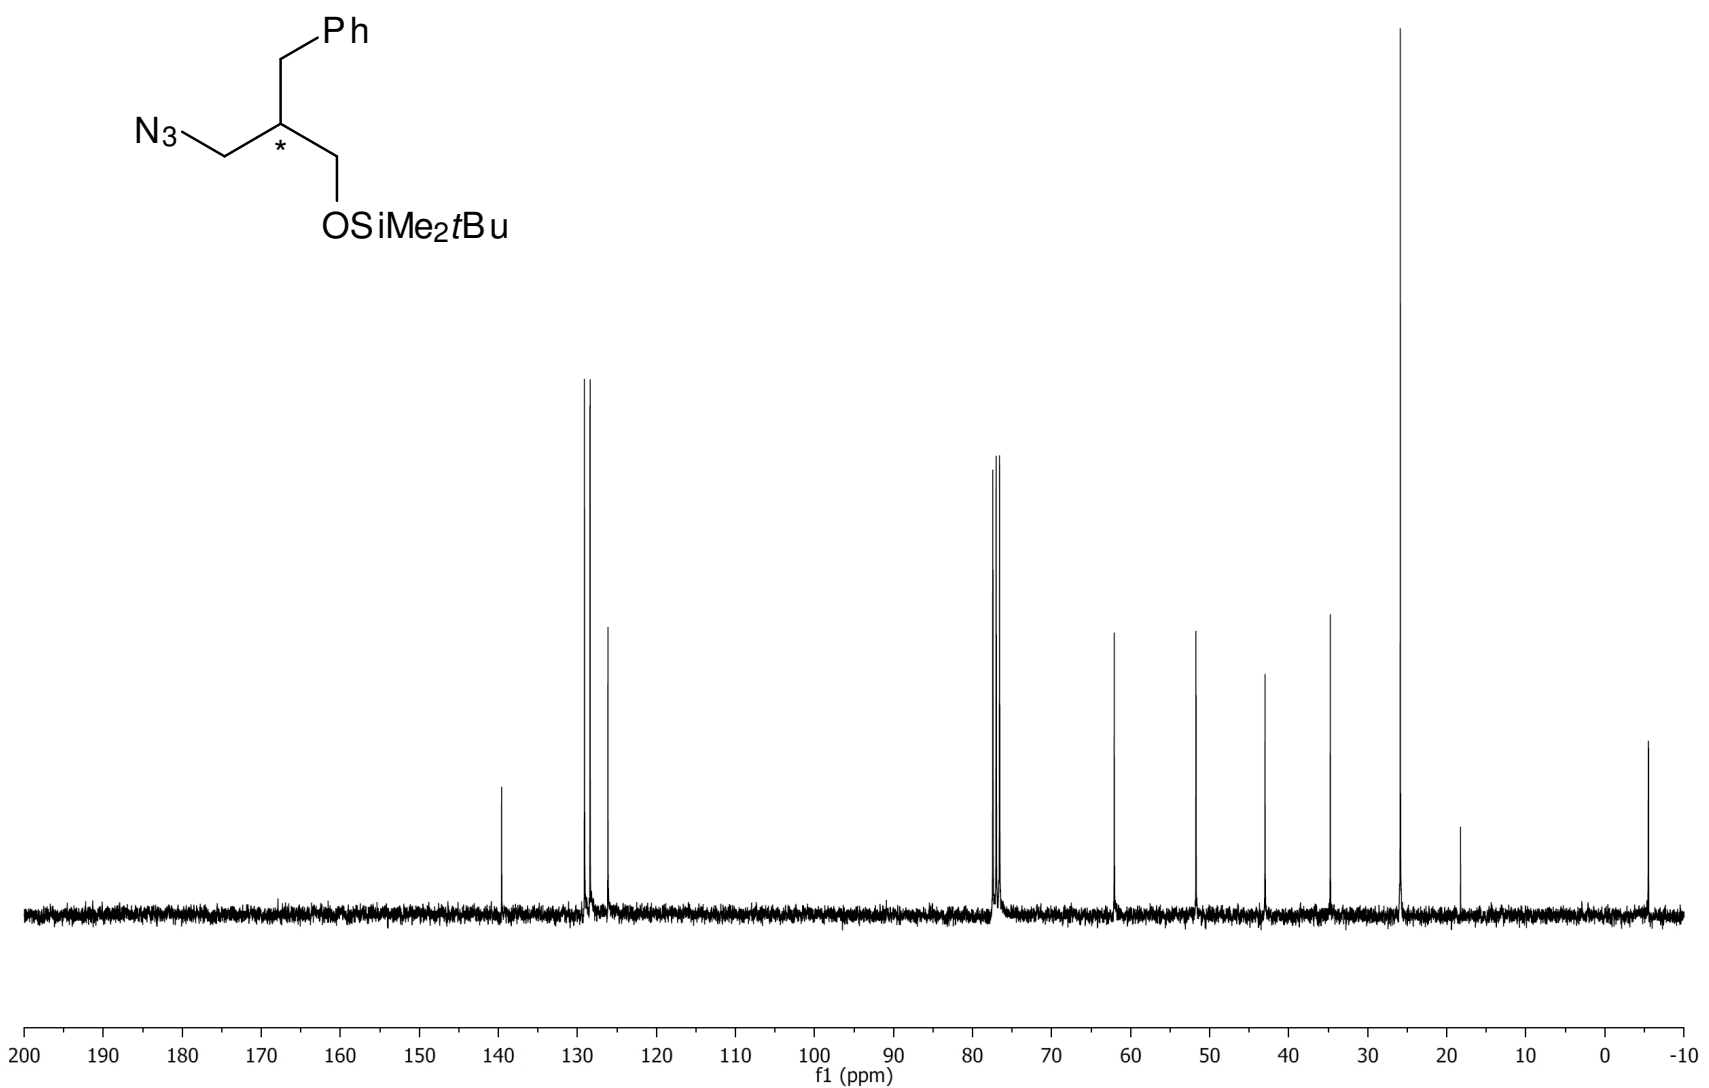

<sup>1</sup>H NMR of compound **30**

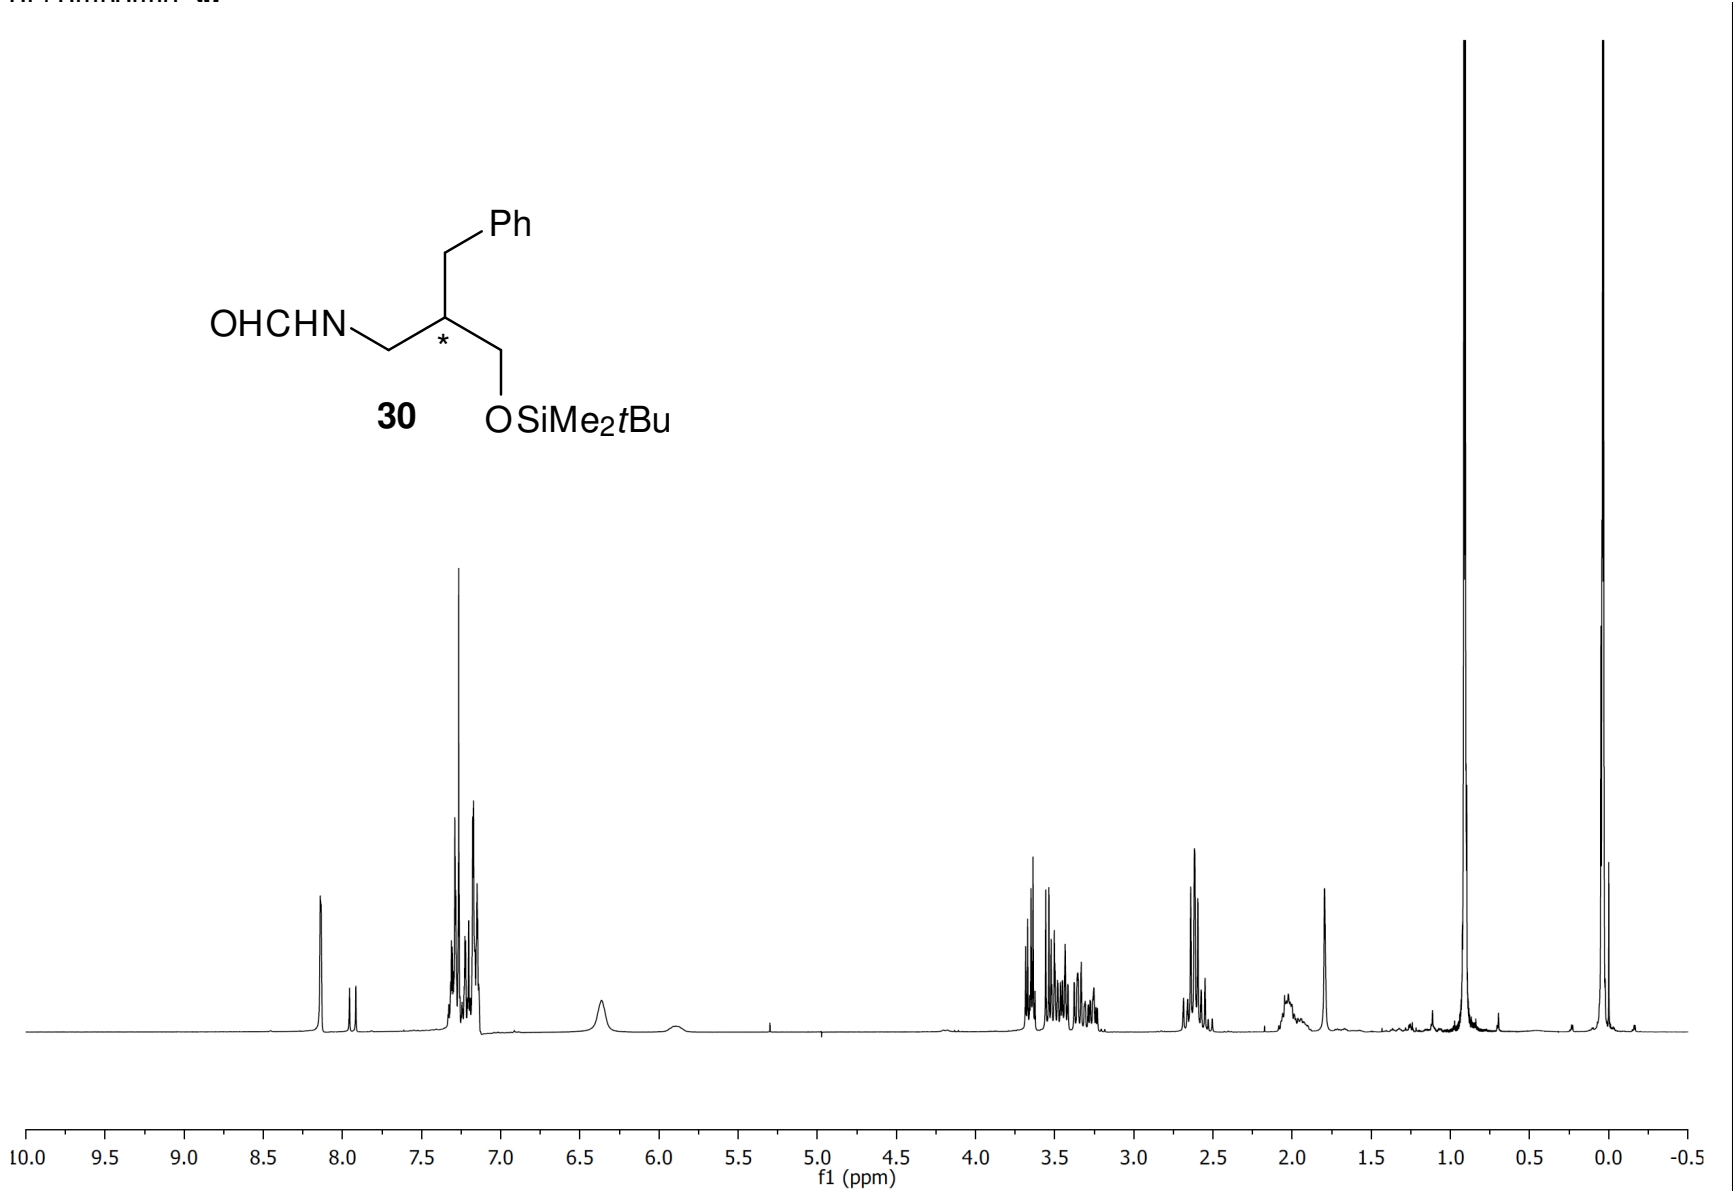



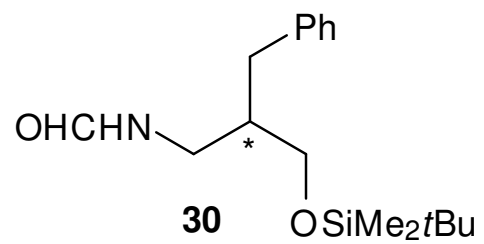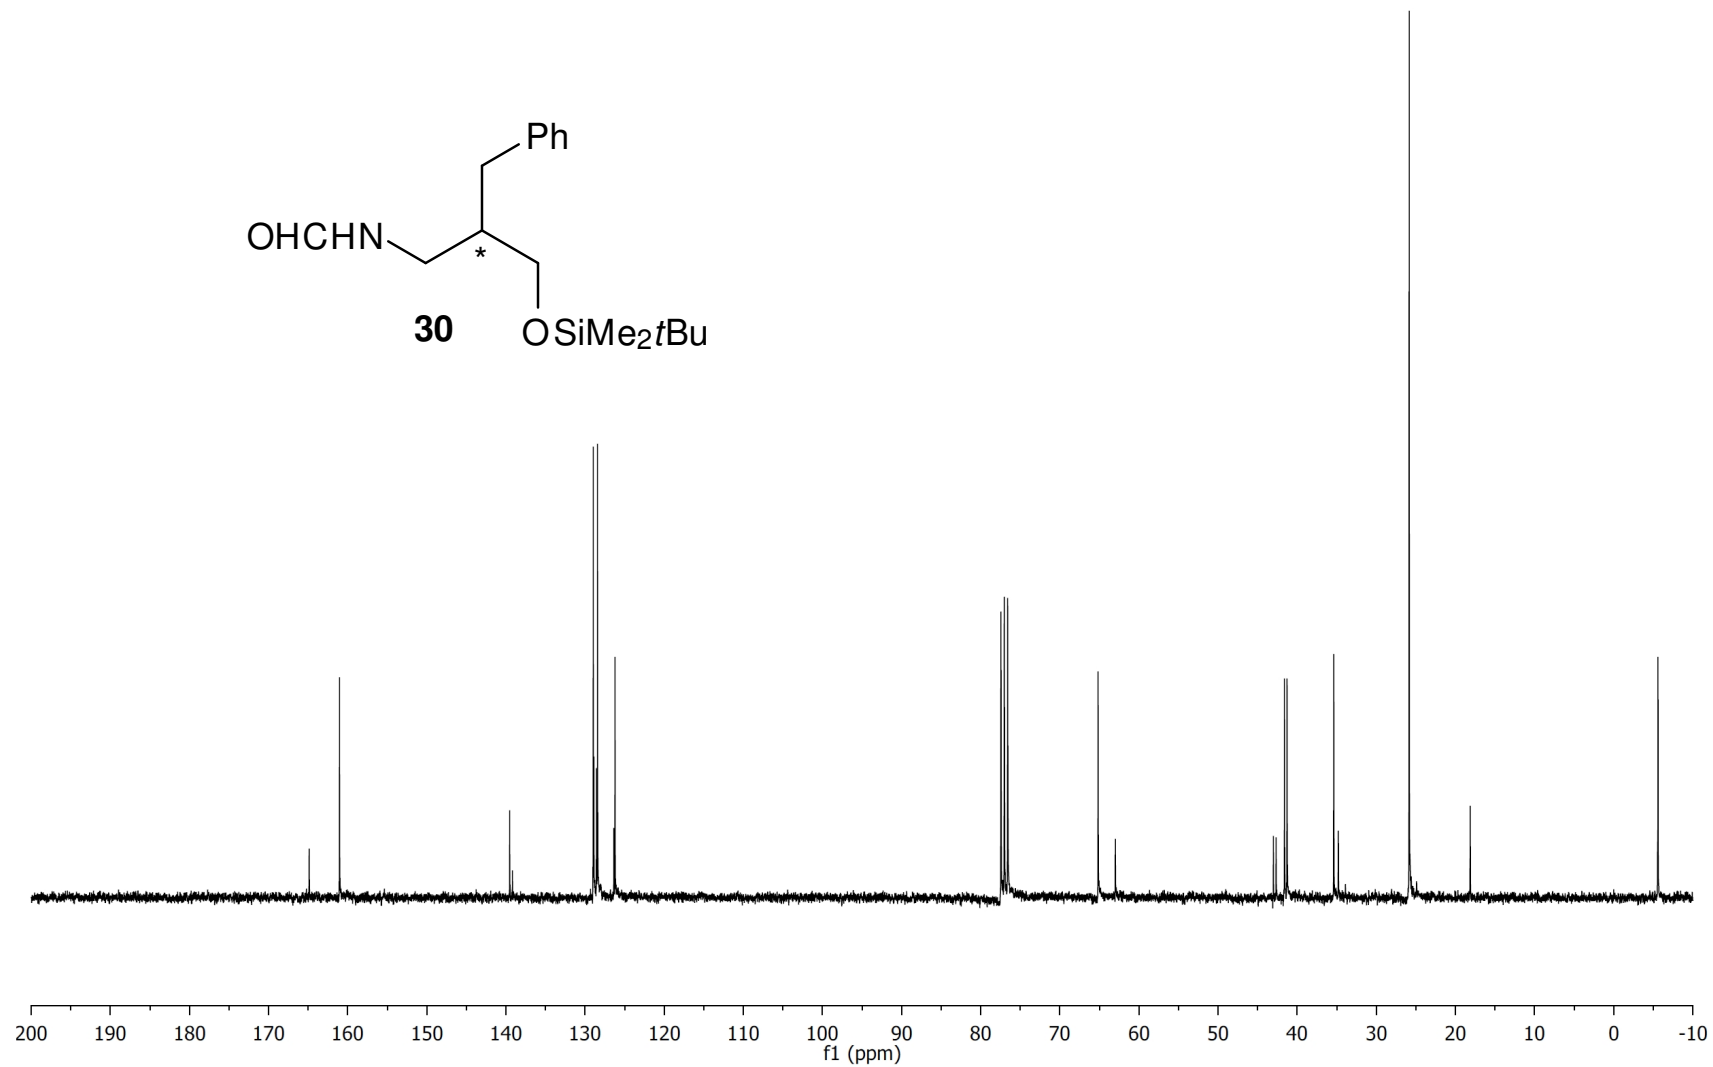

<sup>1</sup>H NMR of compound **32**

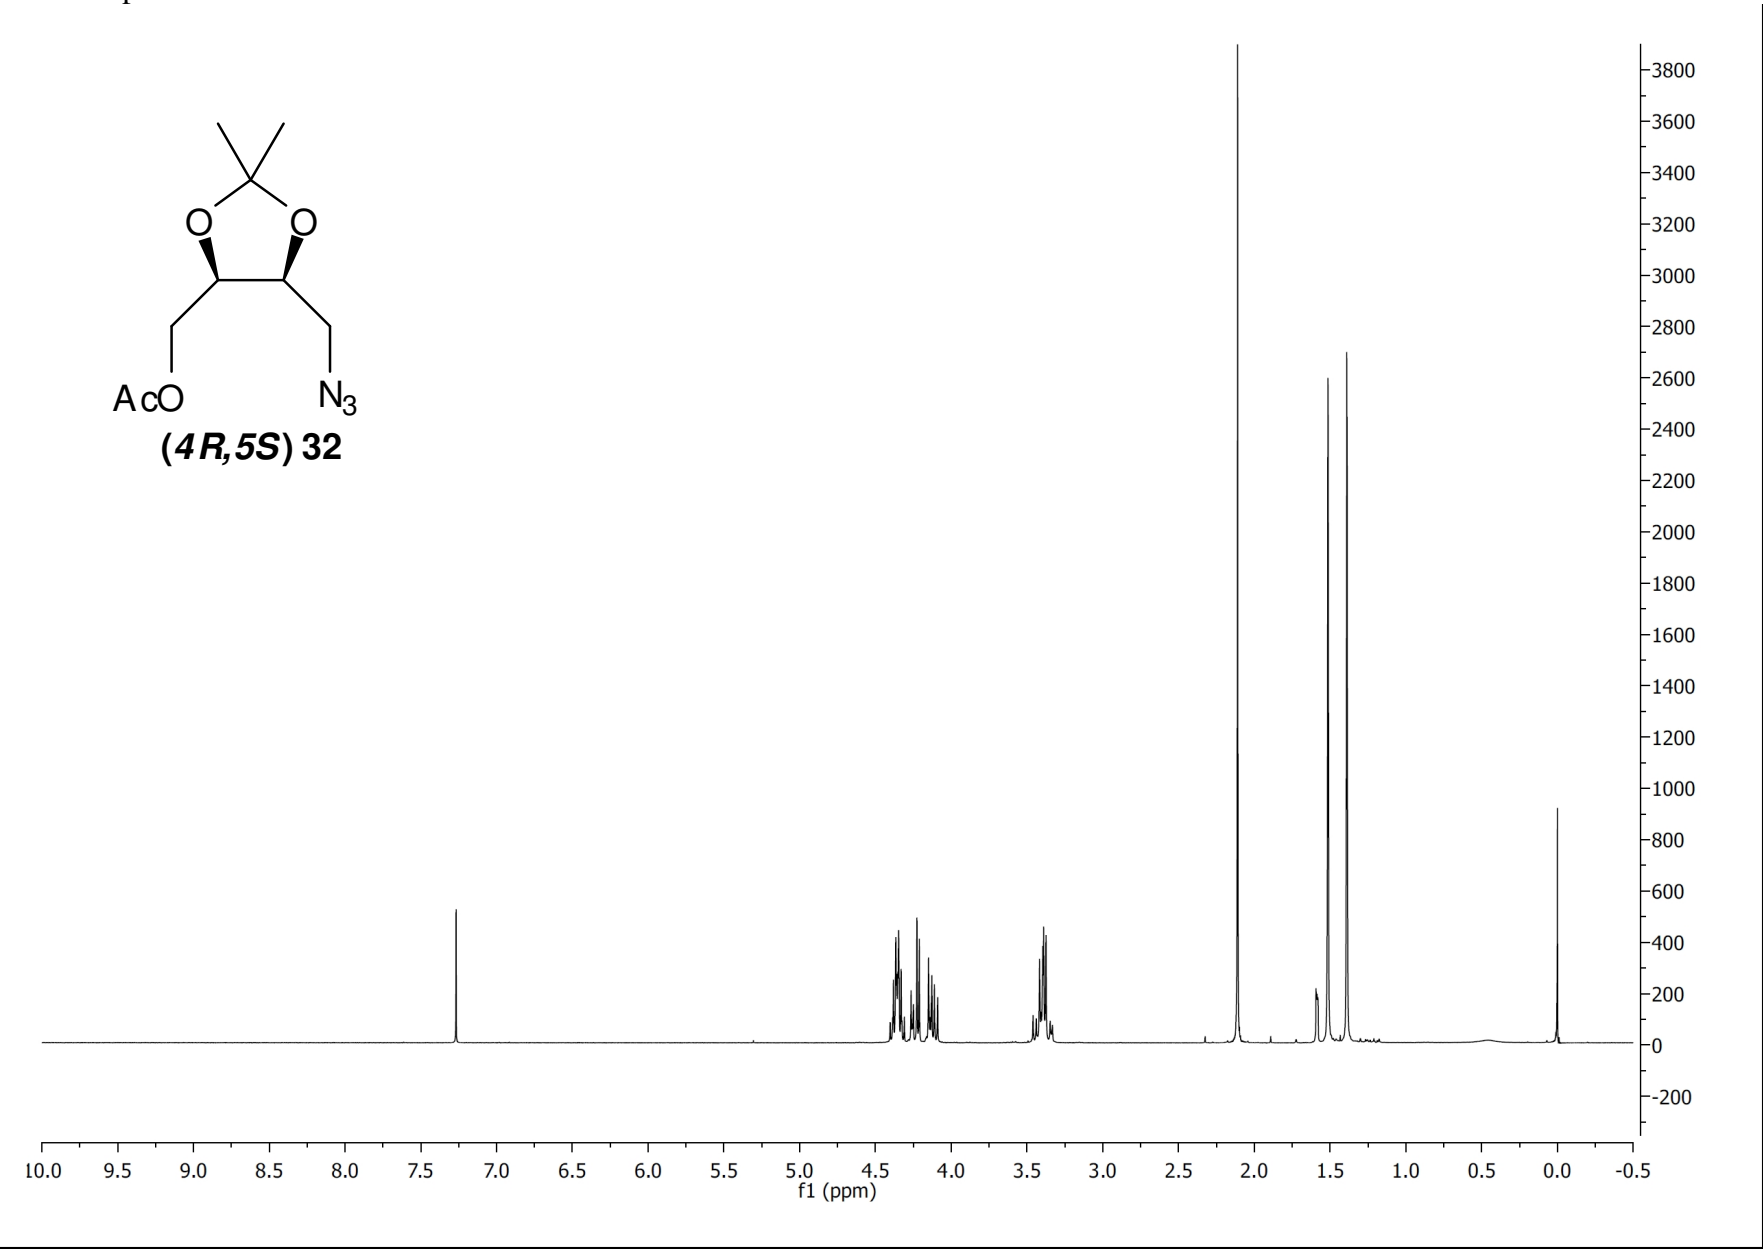

<sup>13</sup>C NMR of compound **32**

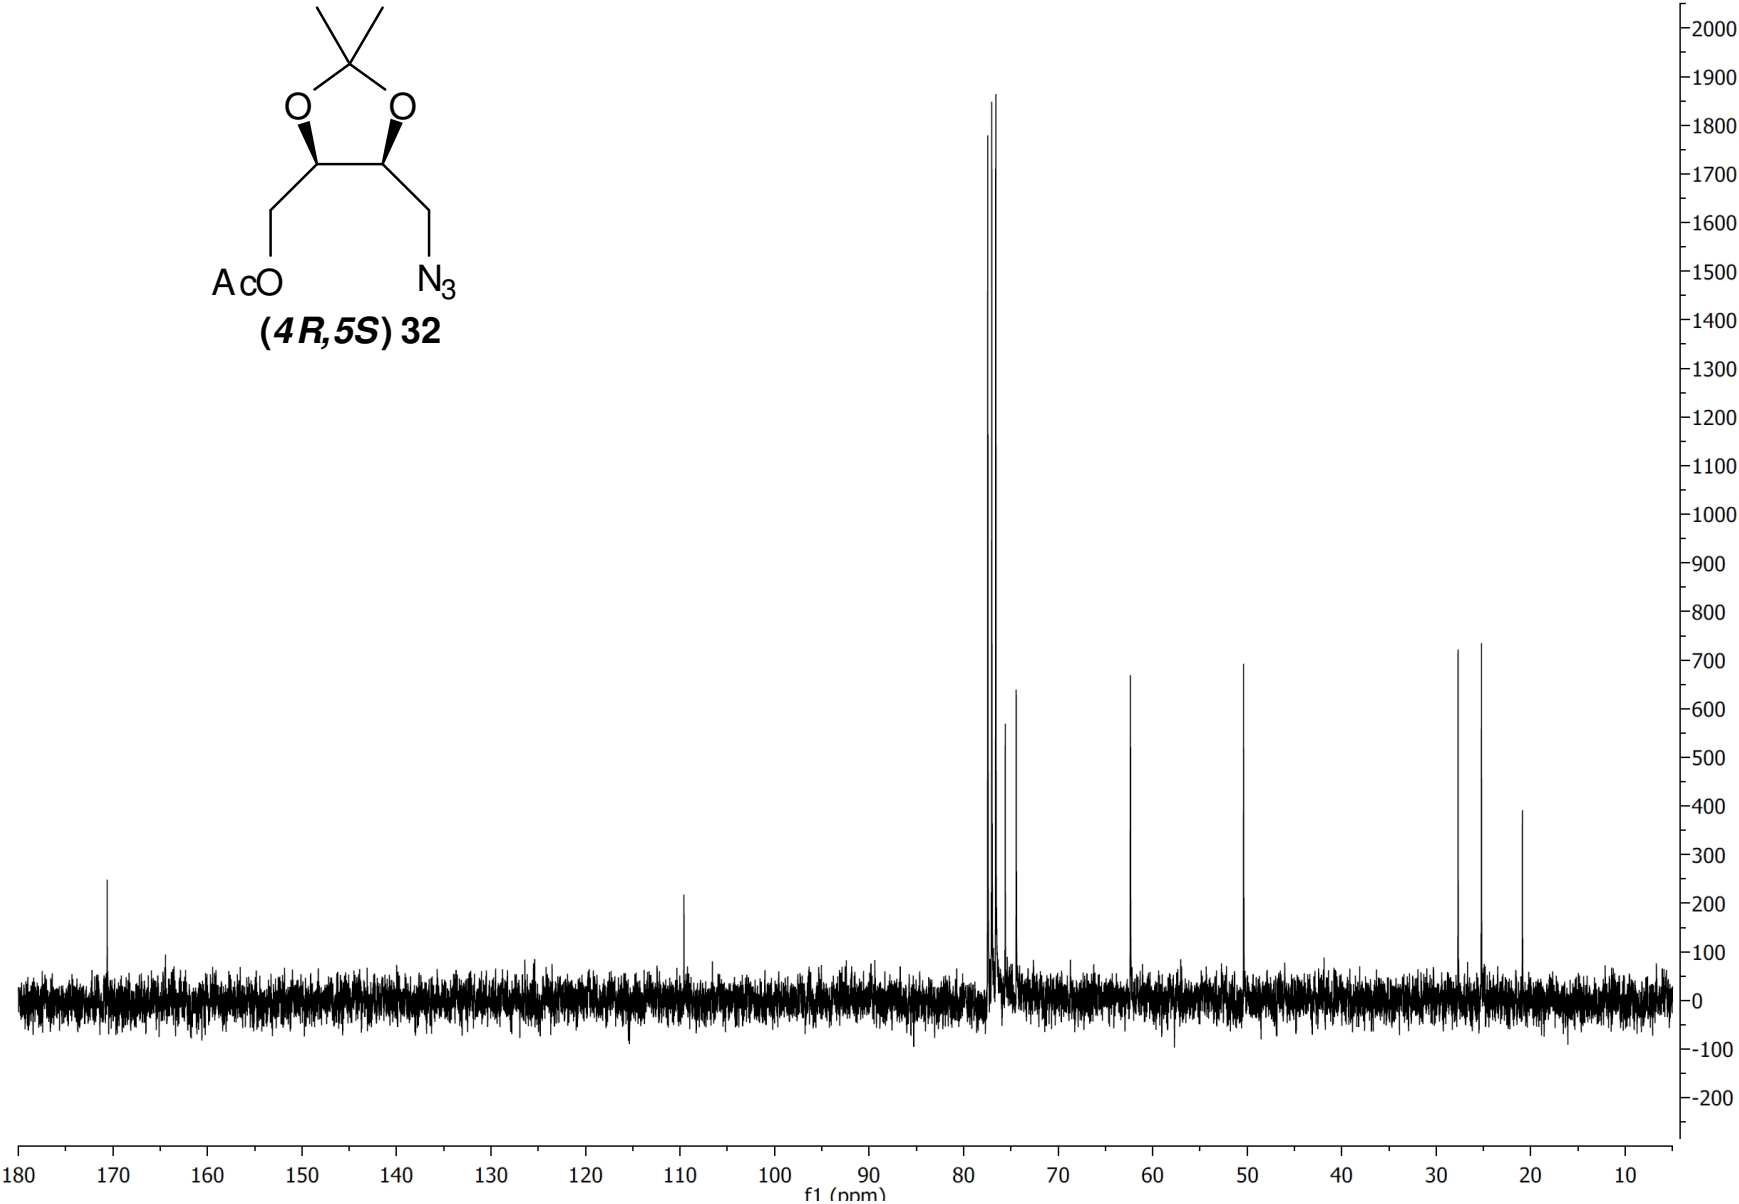

<sup>1</sup>H NMR of compound **34**

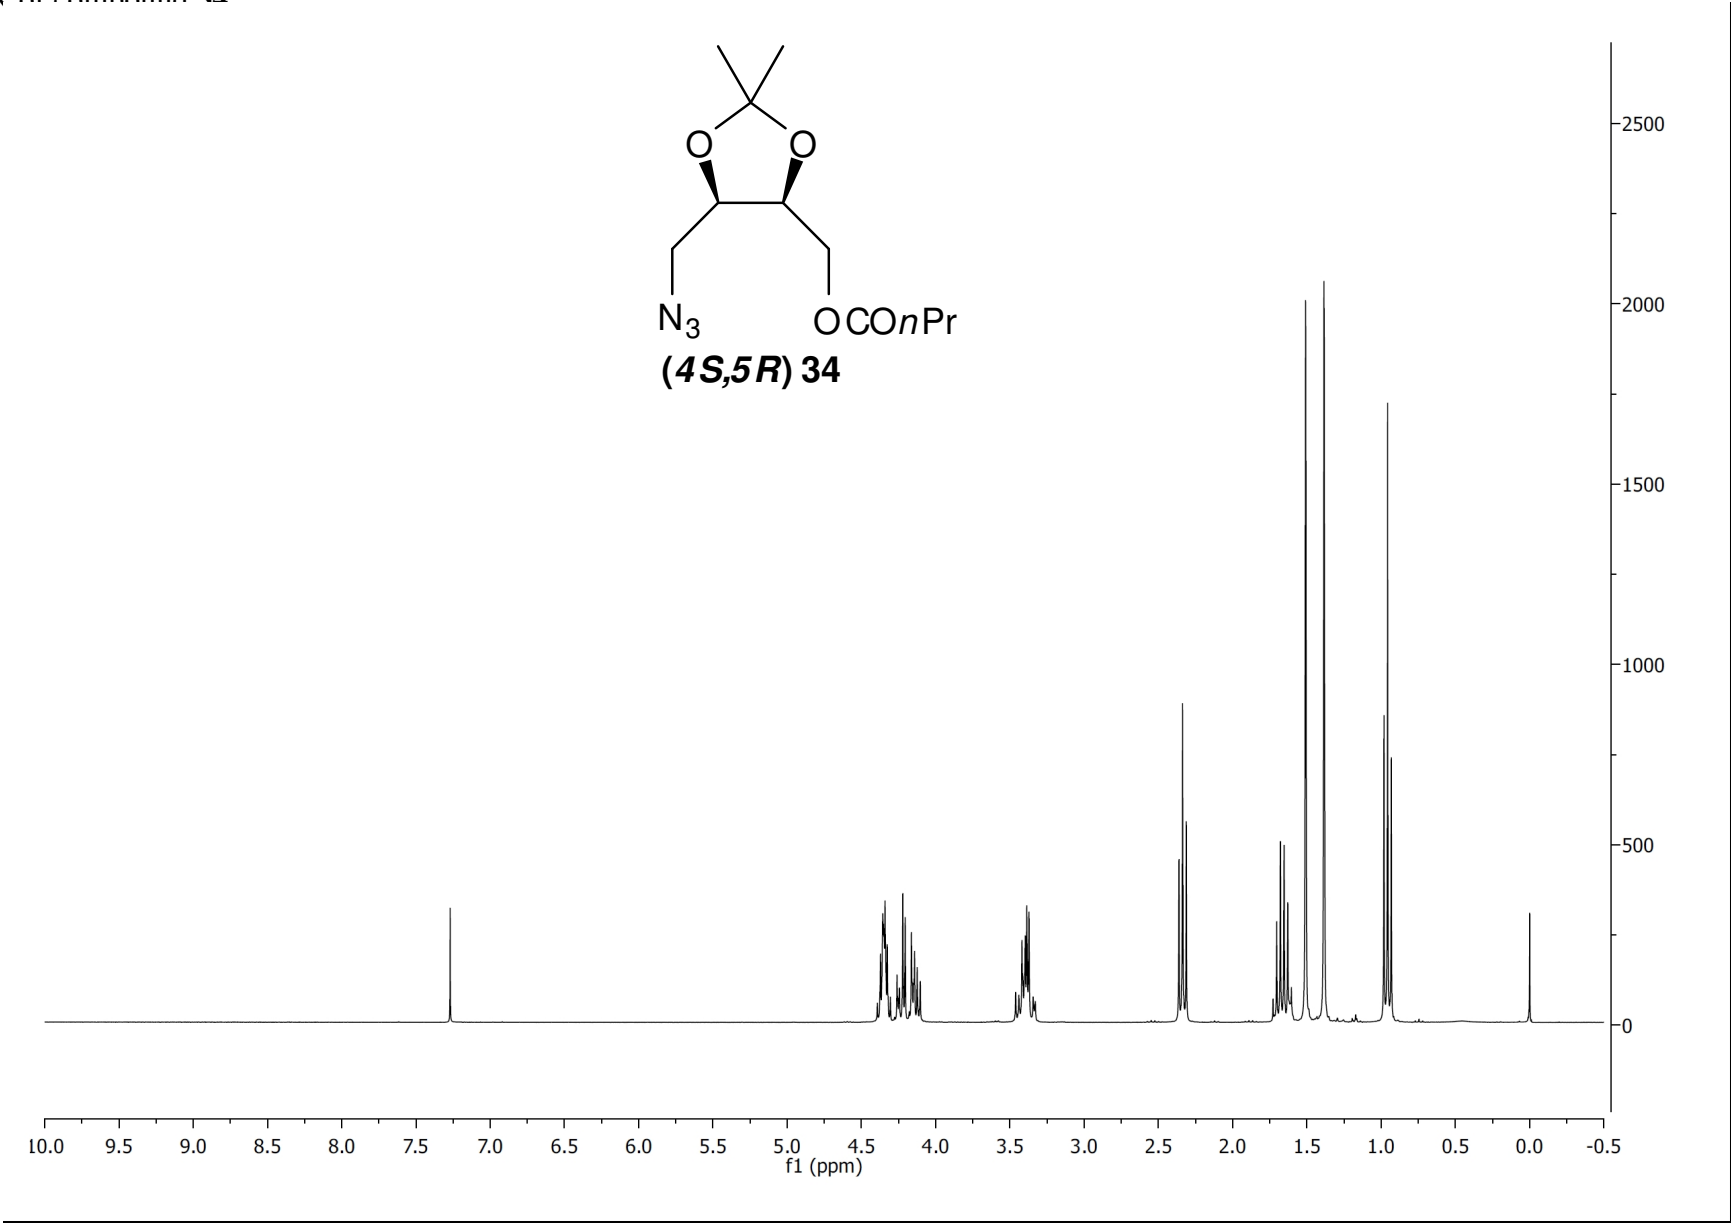

<sup>13</sup>C NMR of compound **34**

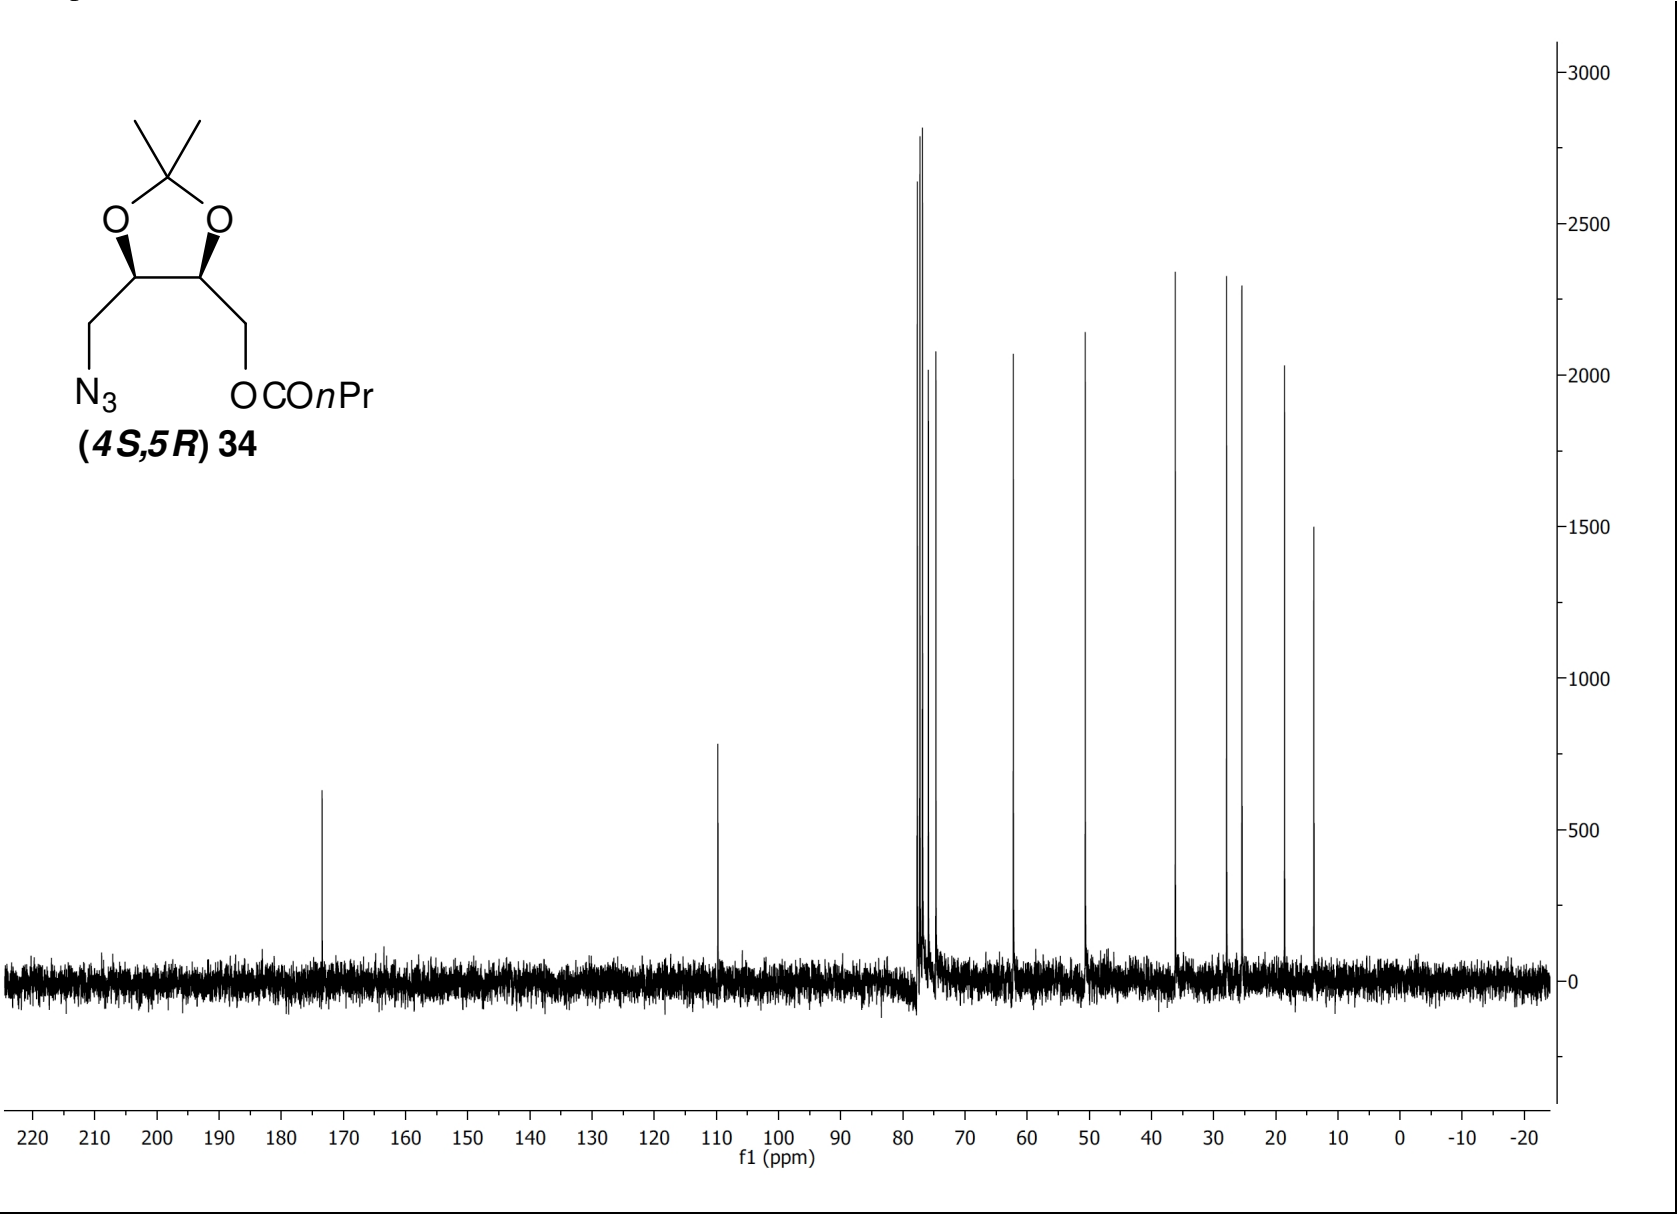

Supplement: c1ob06632c.pdf [file c1ob06632c.pdf]
