# Supplementary material for: Diversity oriented and chemoenzymatic synthesis of densely functionalized pyrrolidines through a highly diastereoselective Ugi multicomponent reaction
Source: Royal Society of Chemistry journal article supplement (doi:10.1039/c1ob06632c), 2011-11-03

# **Diversity oriented and chemoenzymatic synthesis of densely functionalized pyrrolidines through a highly diastereoselective Ugi multicomponent reaction**

Valentina Cerulli, Luca Banfi, Andrea Basso, Valeria Rocca, Renata Riva

## **Supporting Information**

### **<sup>1</sup>H AND <sup>13</sup>C NMR SPECTRA OF NEW COMPOUNDS (PART II)**

$^1\text{H}$  NMR of compound **36a**

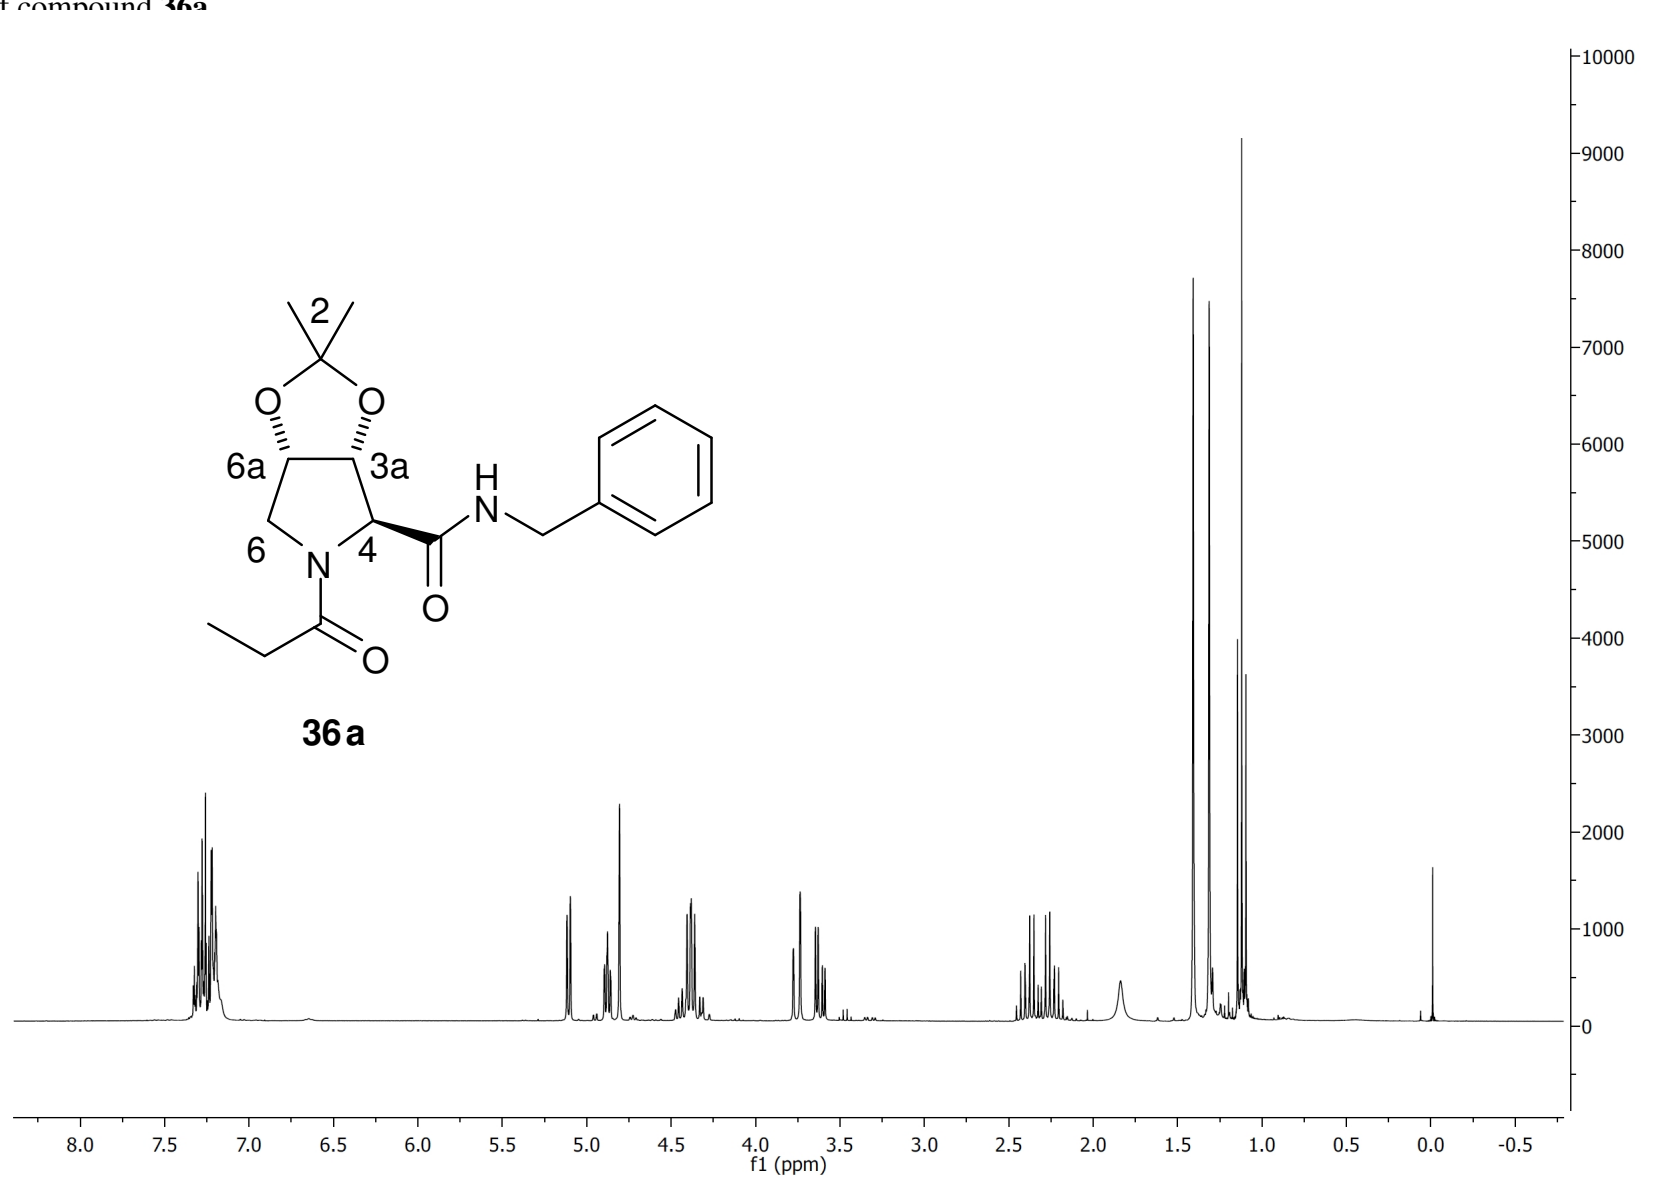

$^{13}\text{C}$  NMR of compound **36a**

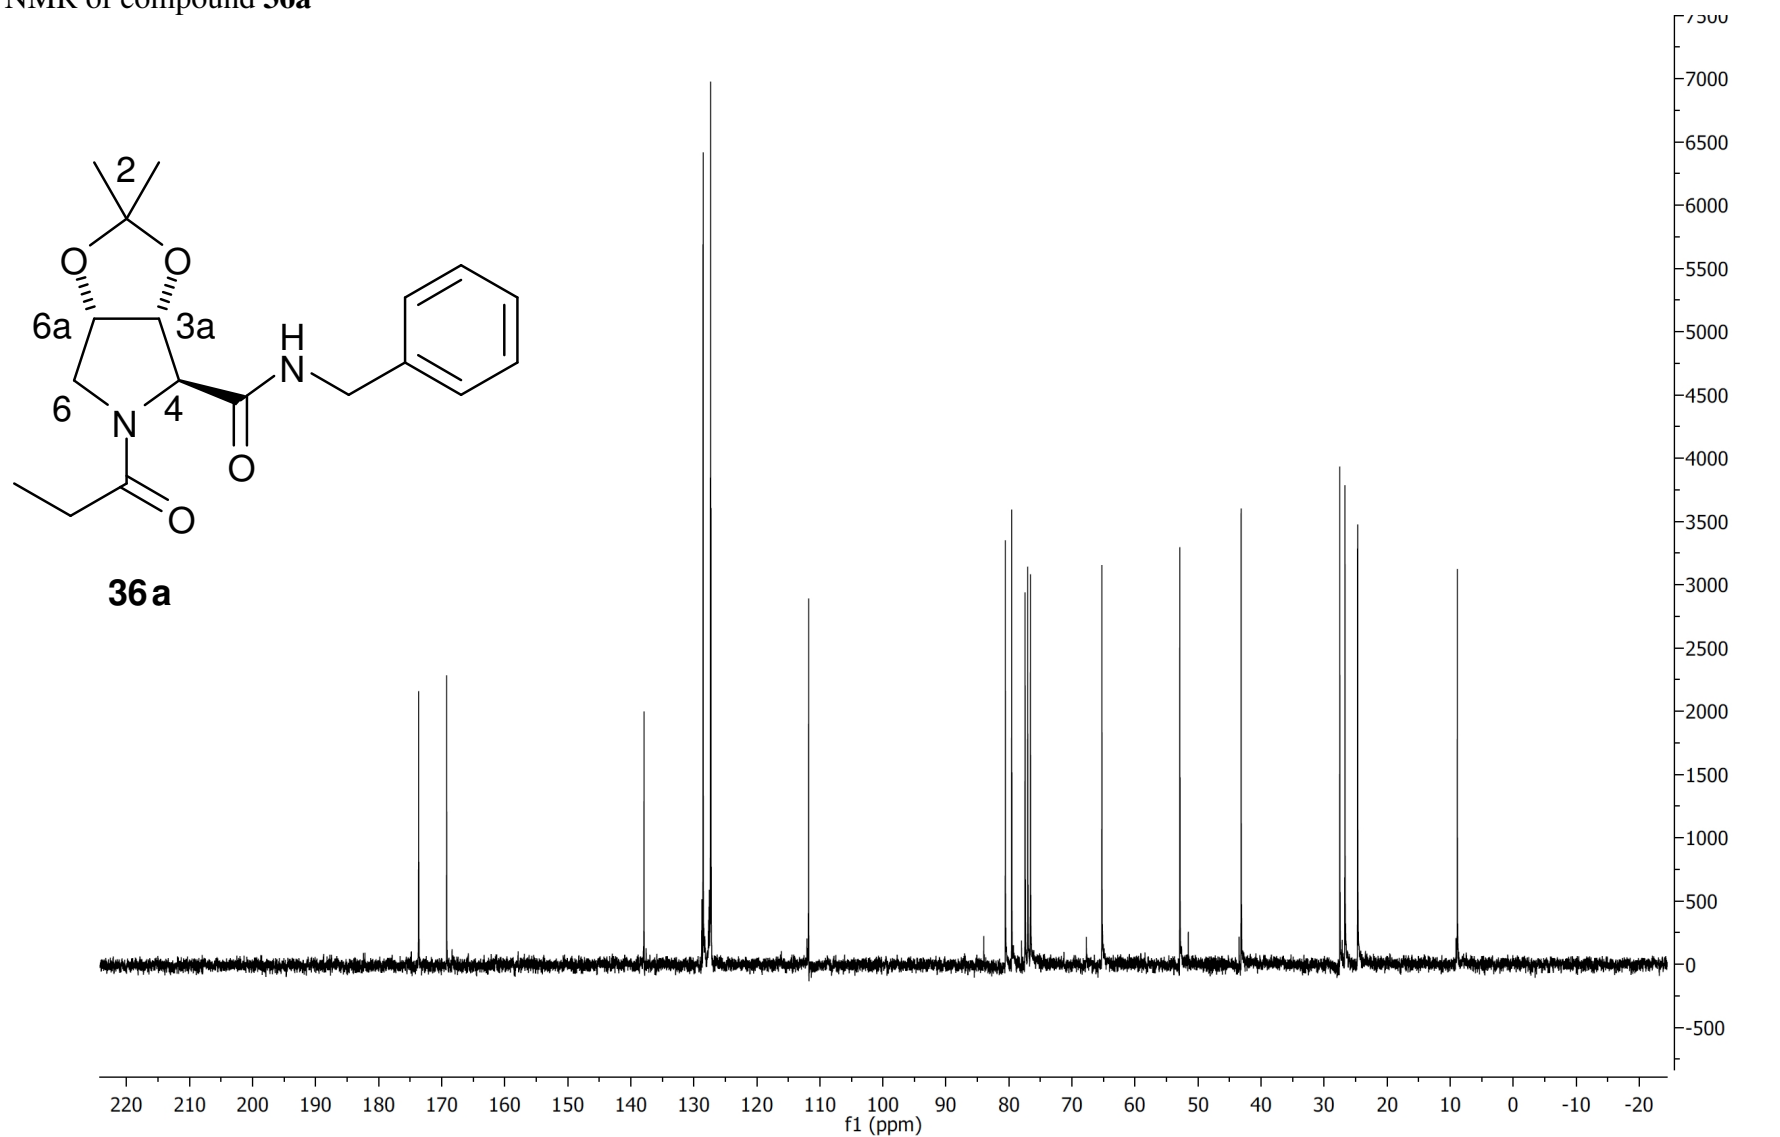

$^1\text{H}$  NMR of compound **37a**

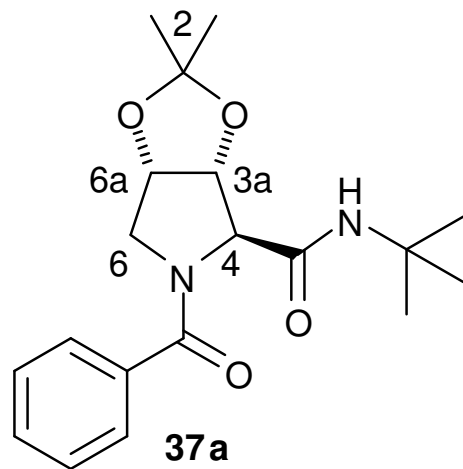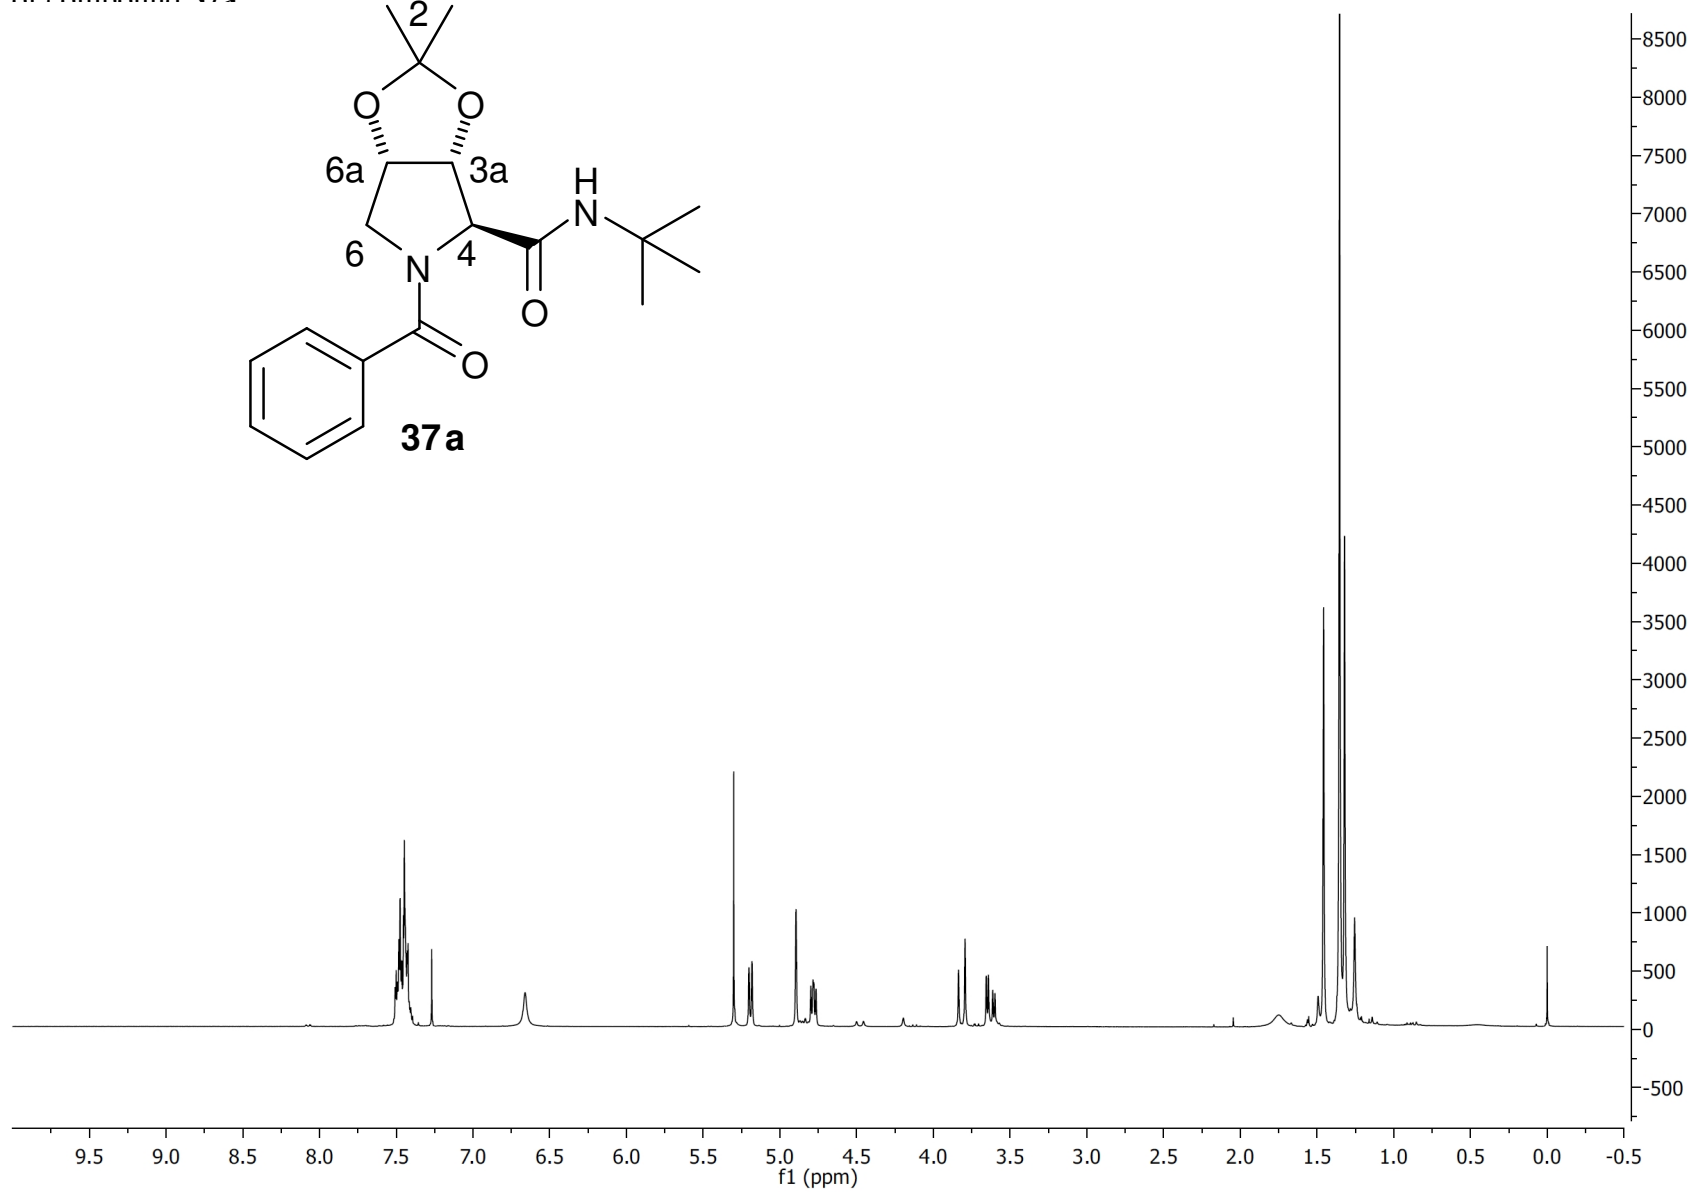

$^{13}\text{C}$  NMR of compound **37a**

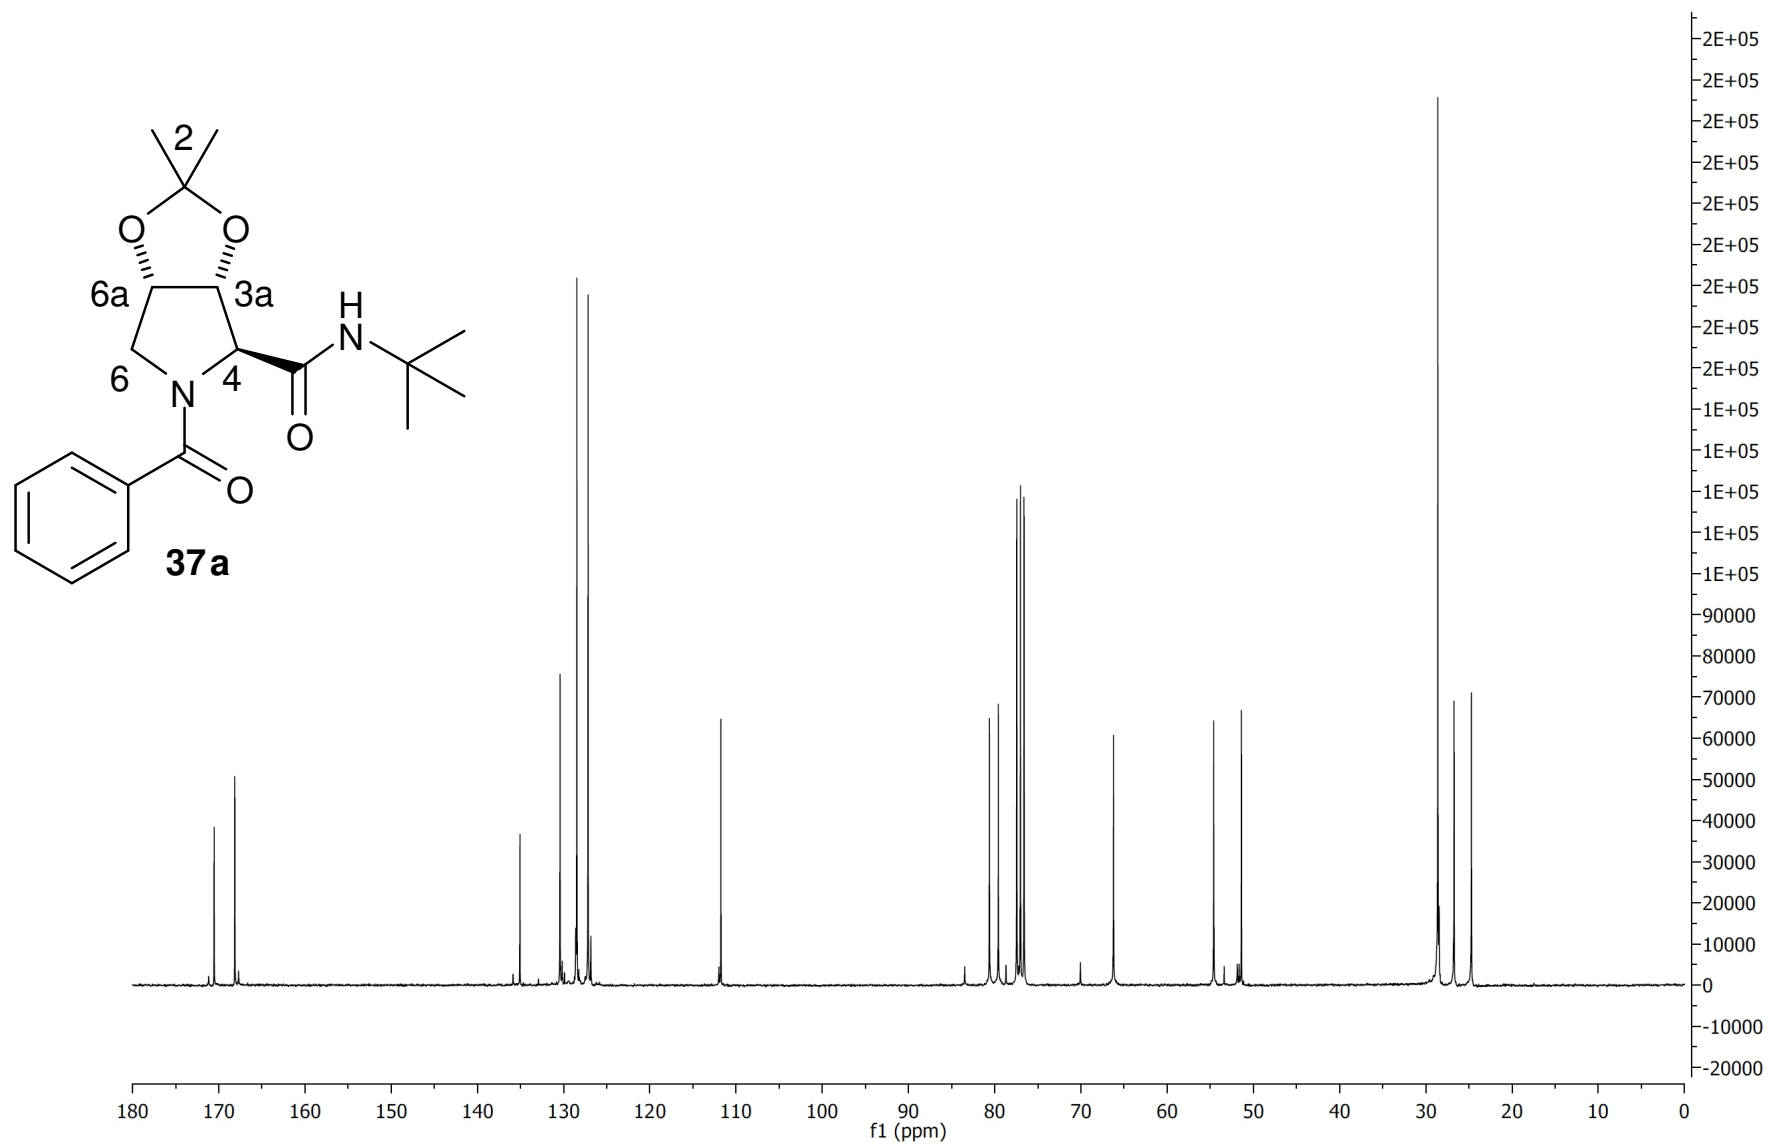

<sup>1</sup>H NMR of compound **38a**

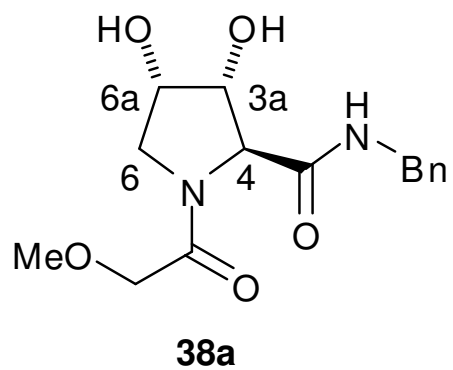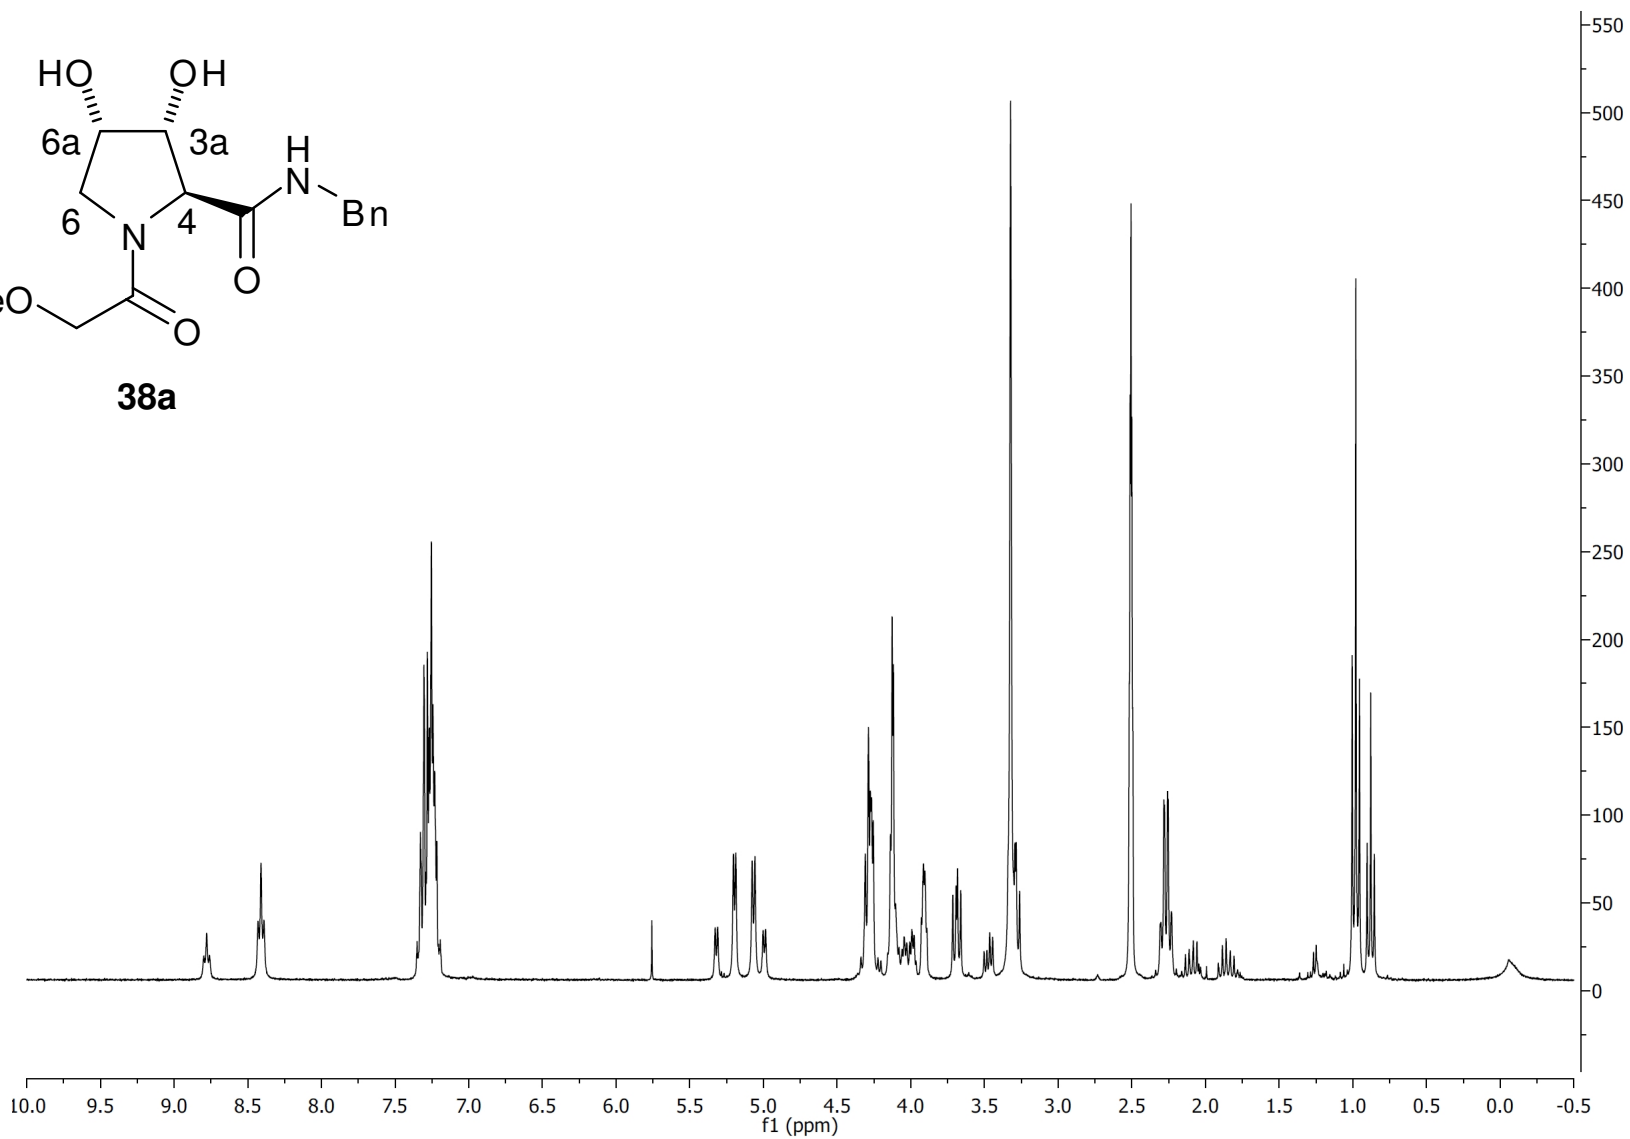

$^{13}\text{C}$  NMR of compound **38a**

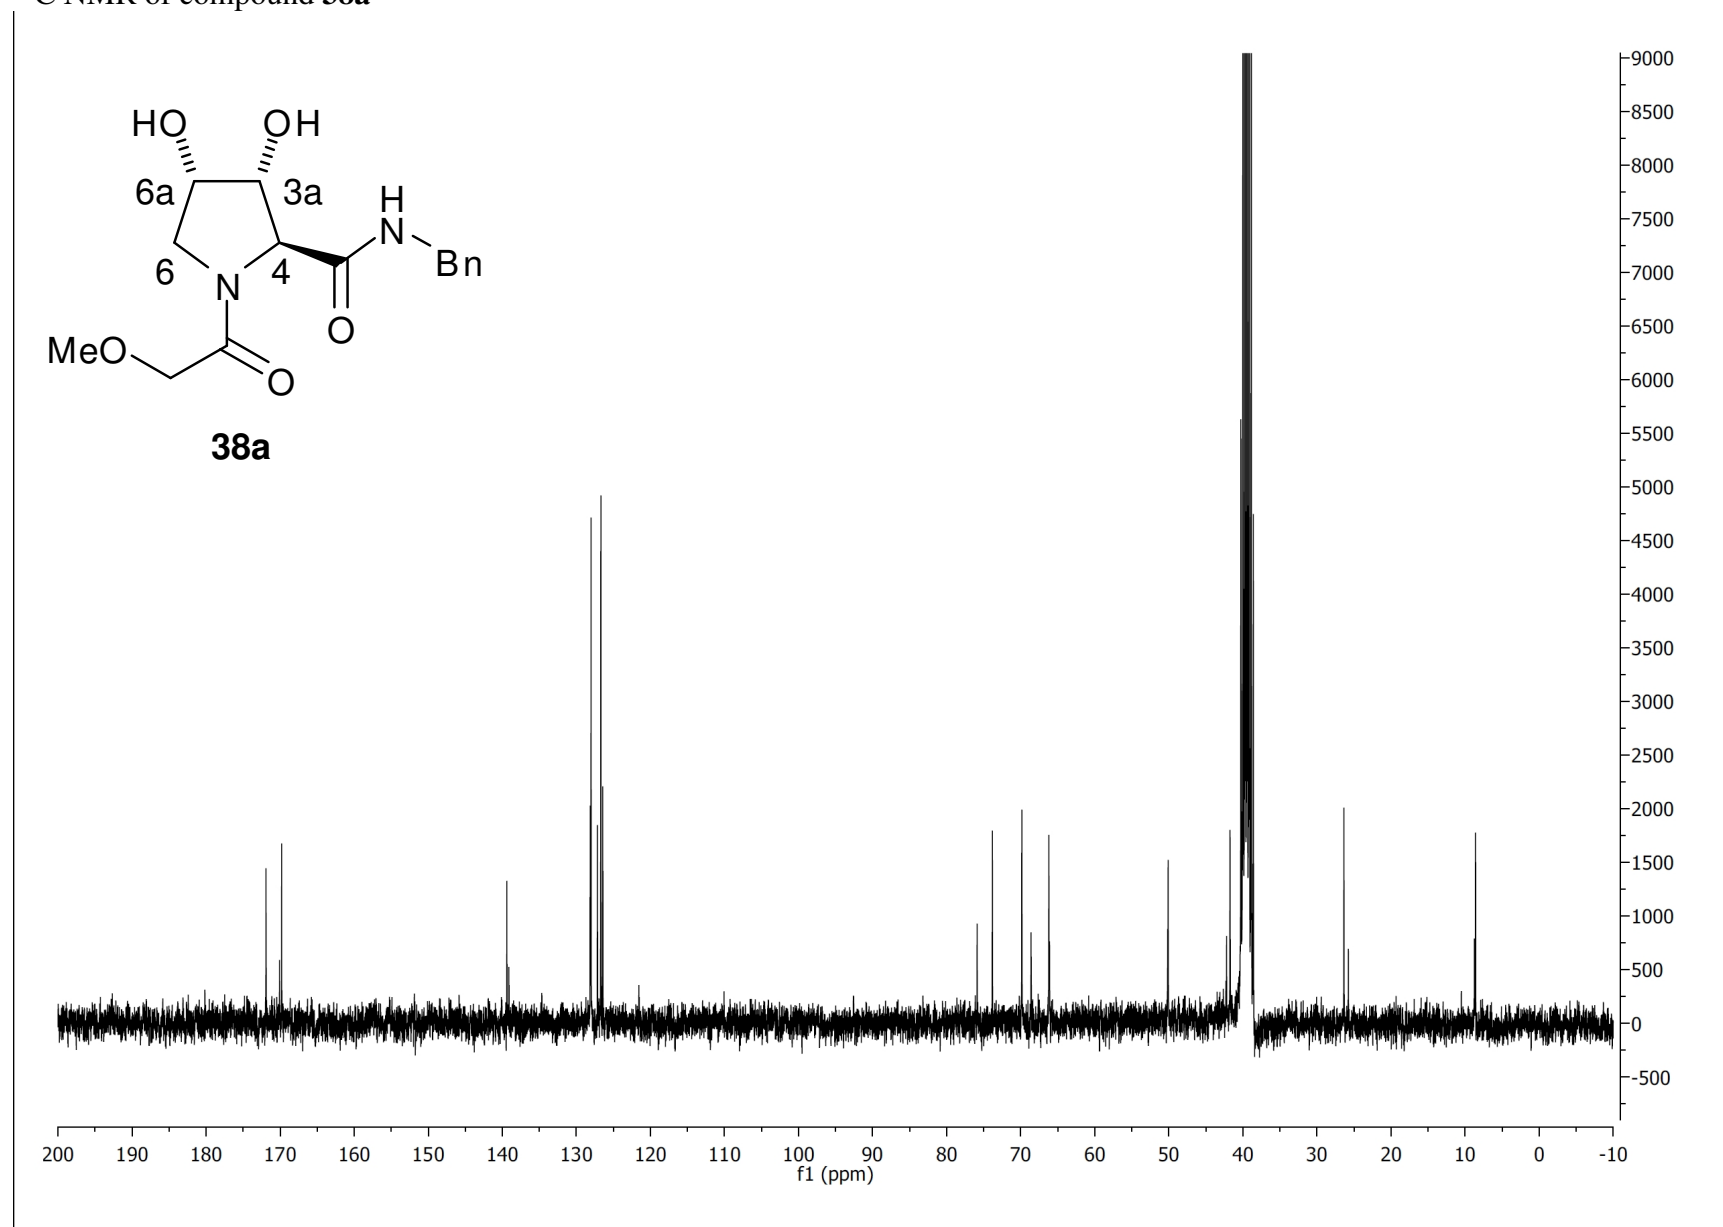

$^1\text{H}$  NMR of compound **39a**

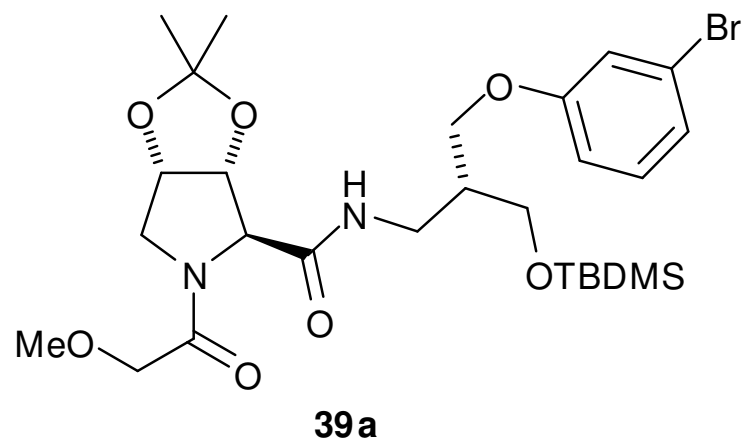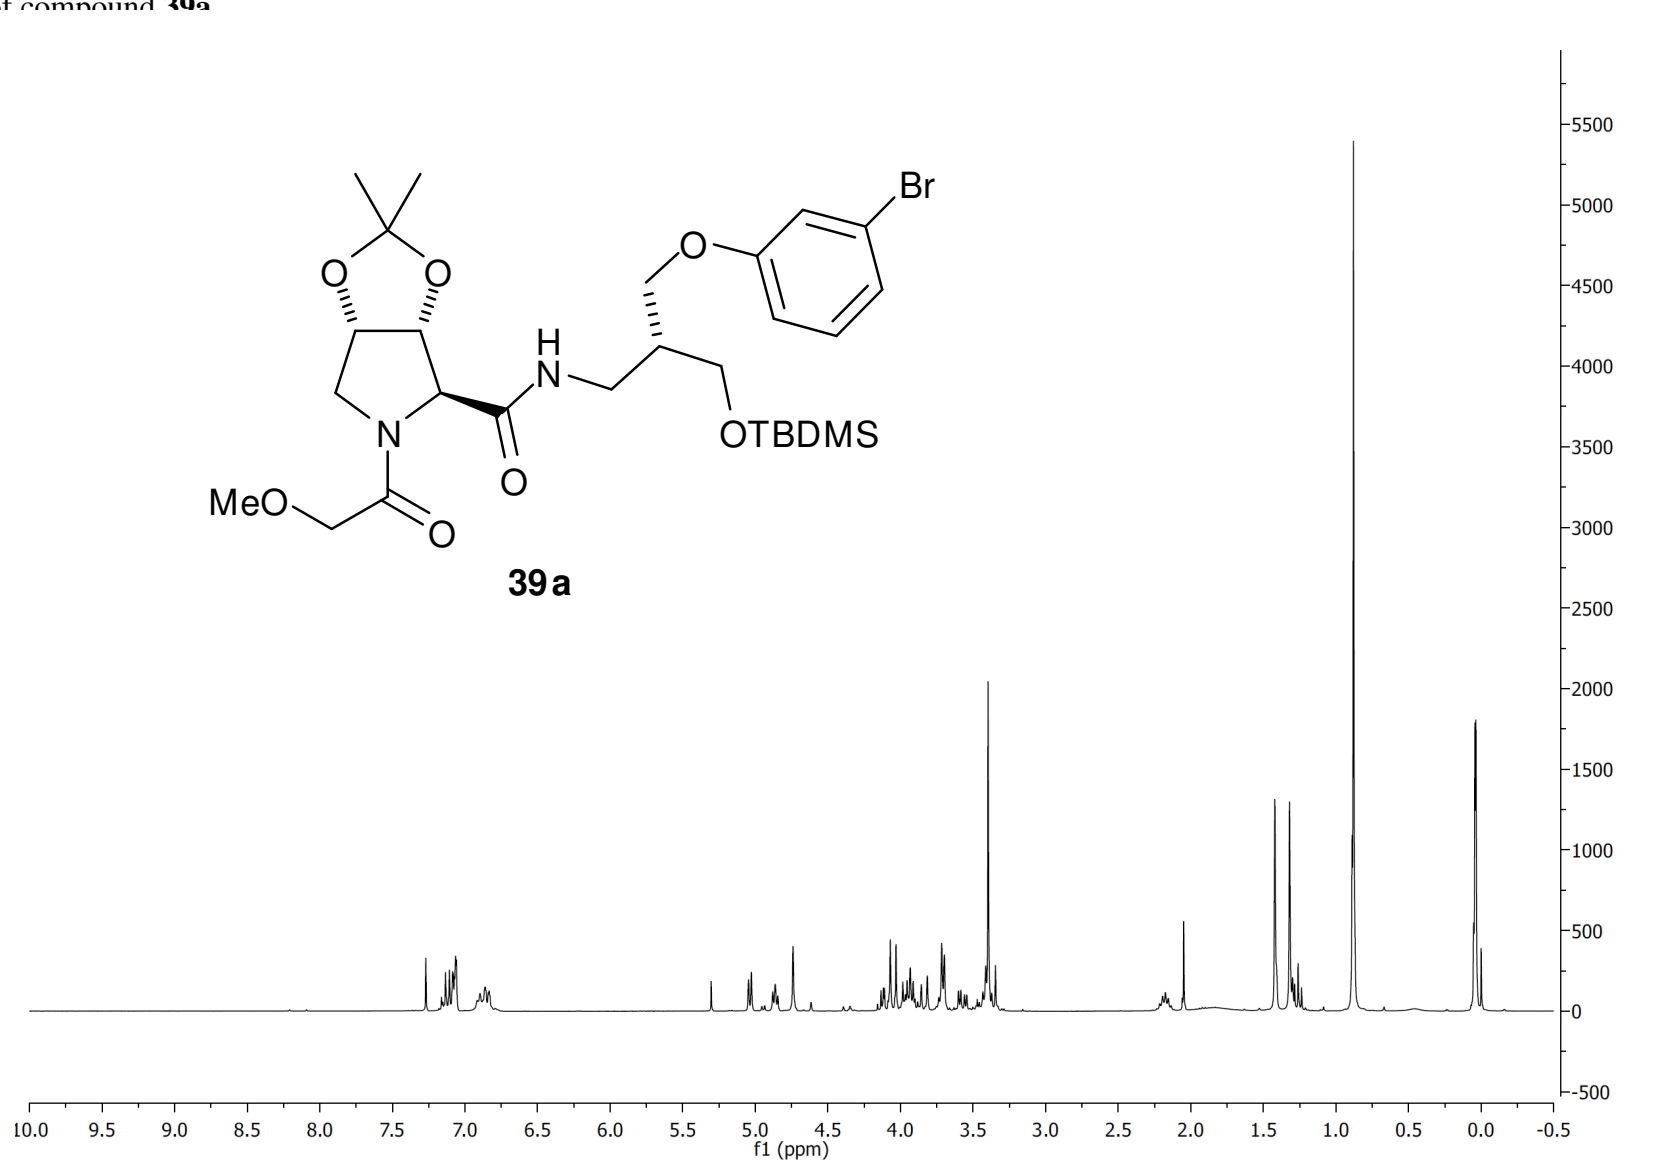



$^{13}\text{C}$  NMR of compound **39a**

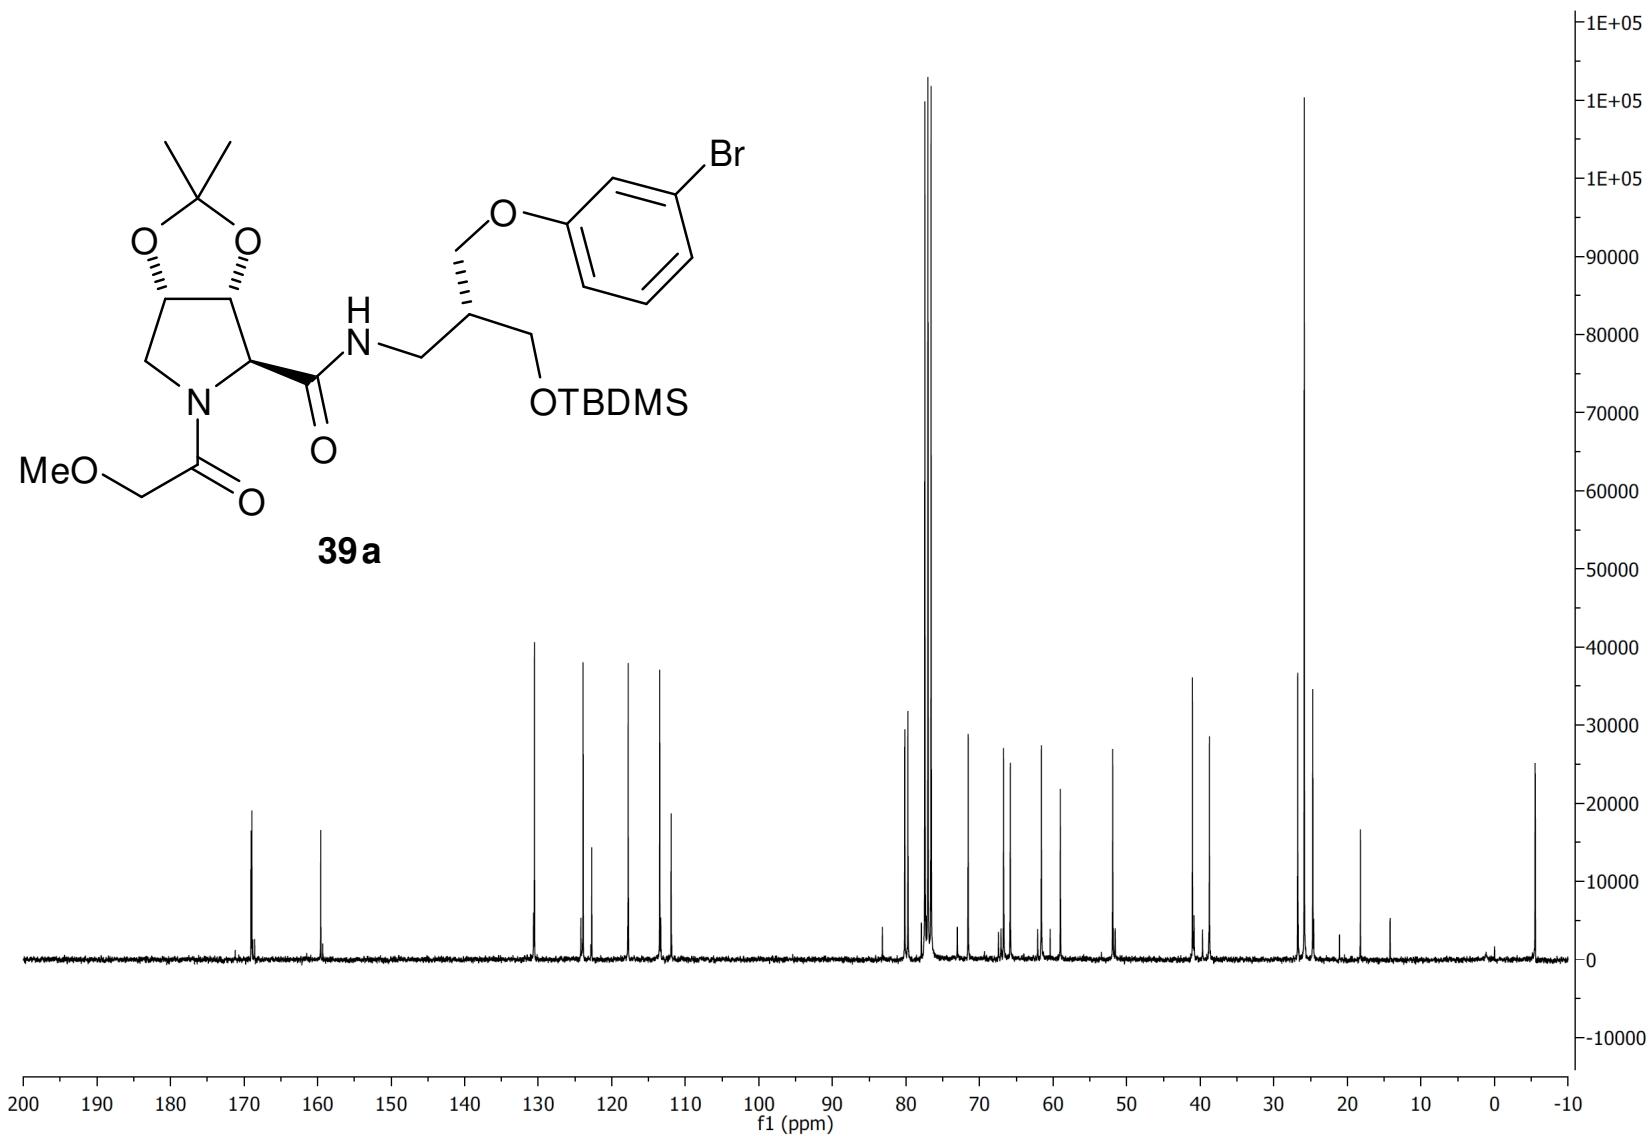

<sup>1</sup>H NMR of compound **39b**

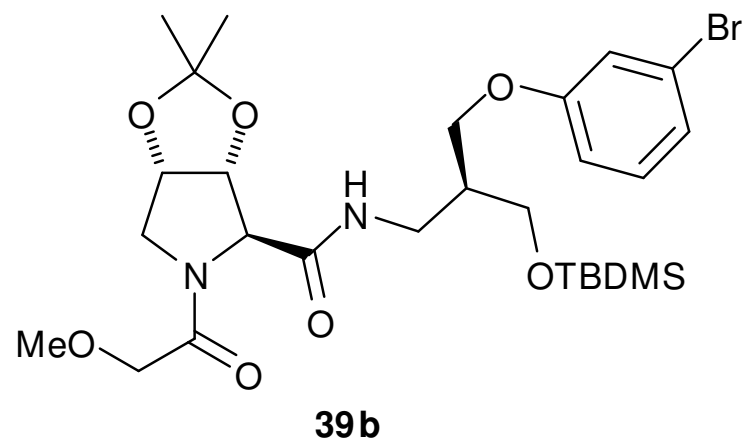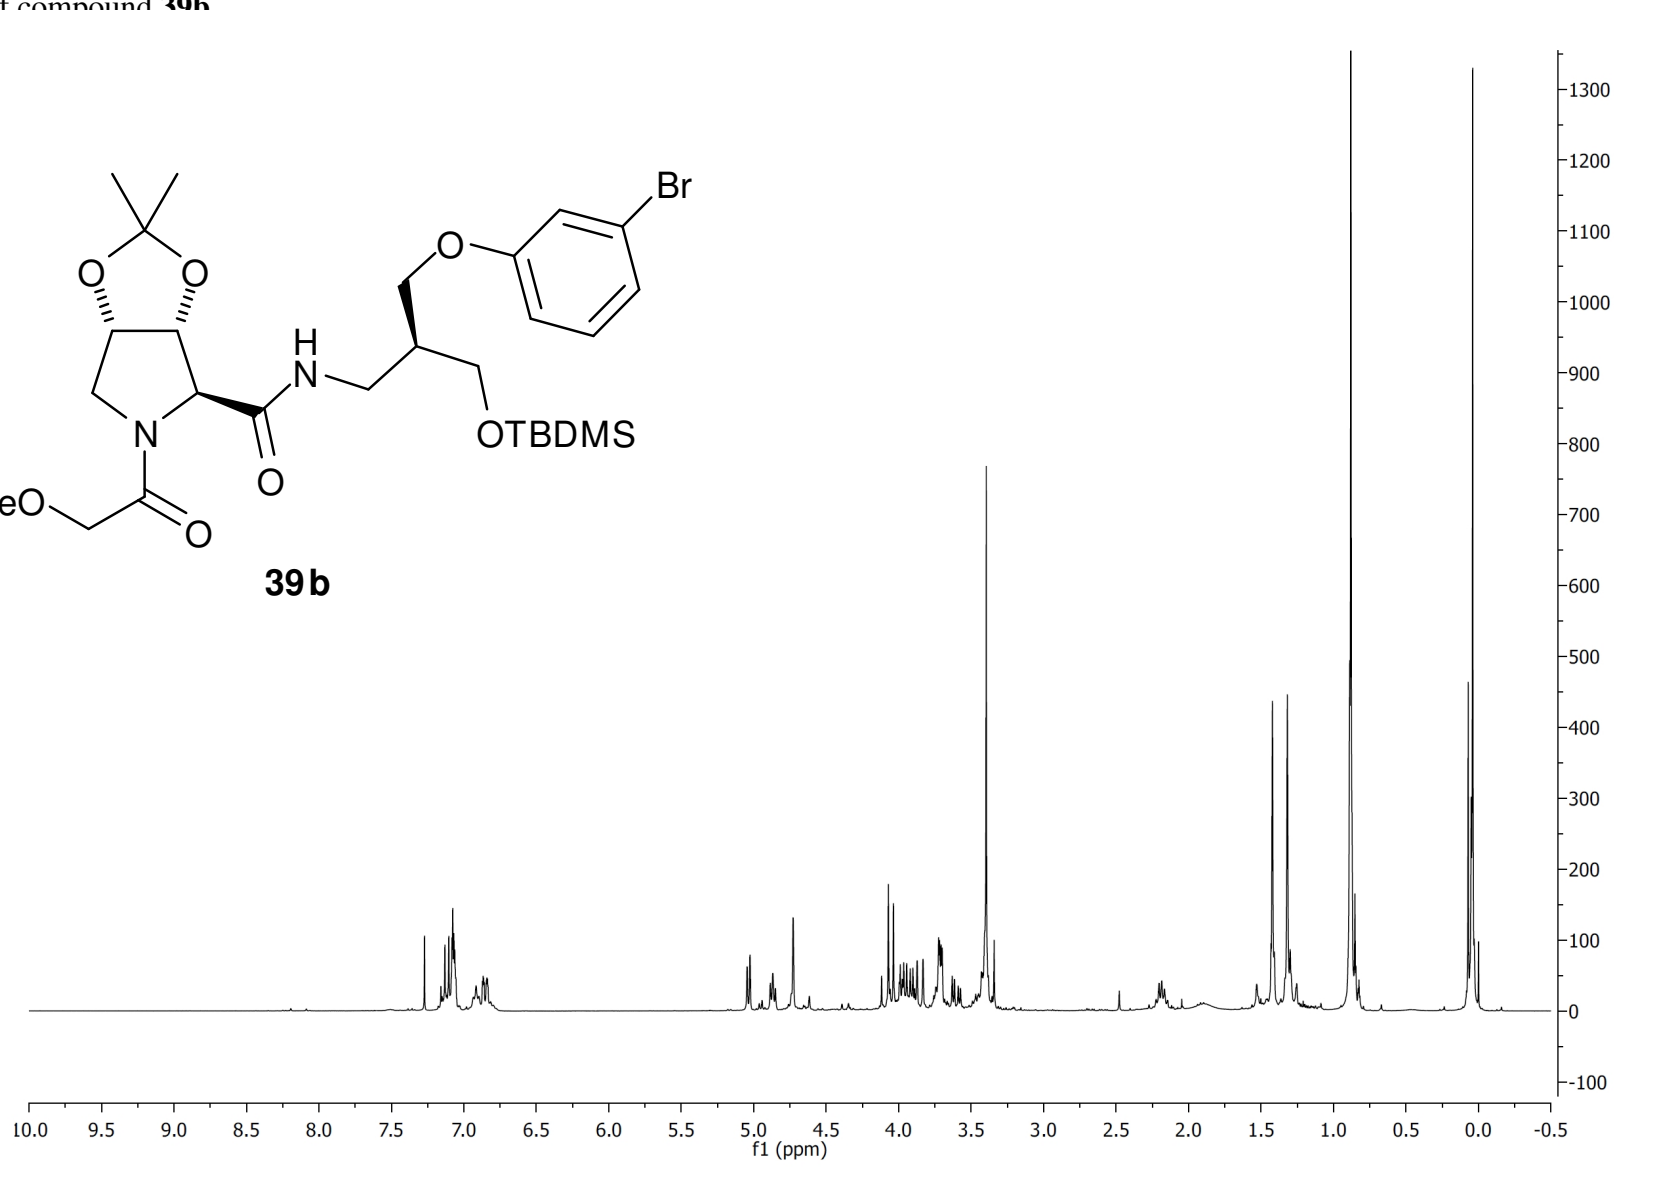

$^{13}\text{C}$  NMR of compound **39b**

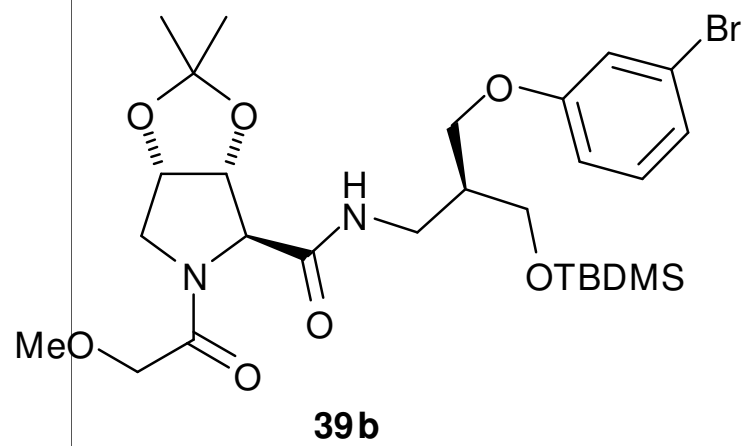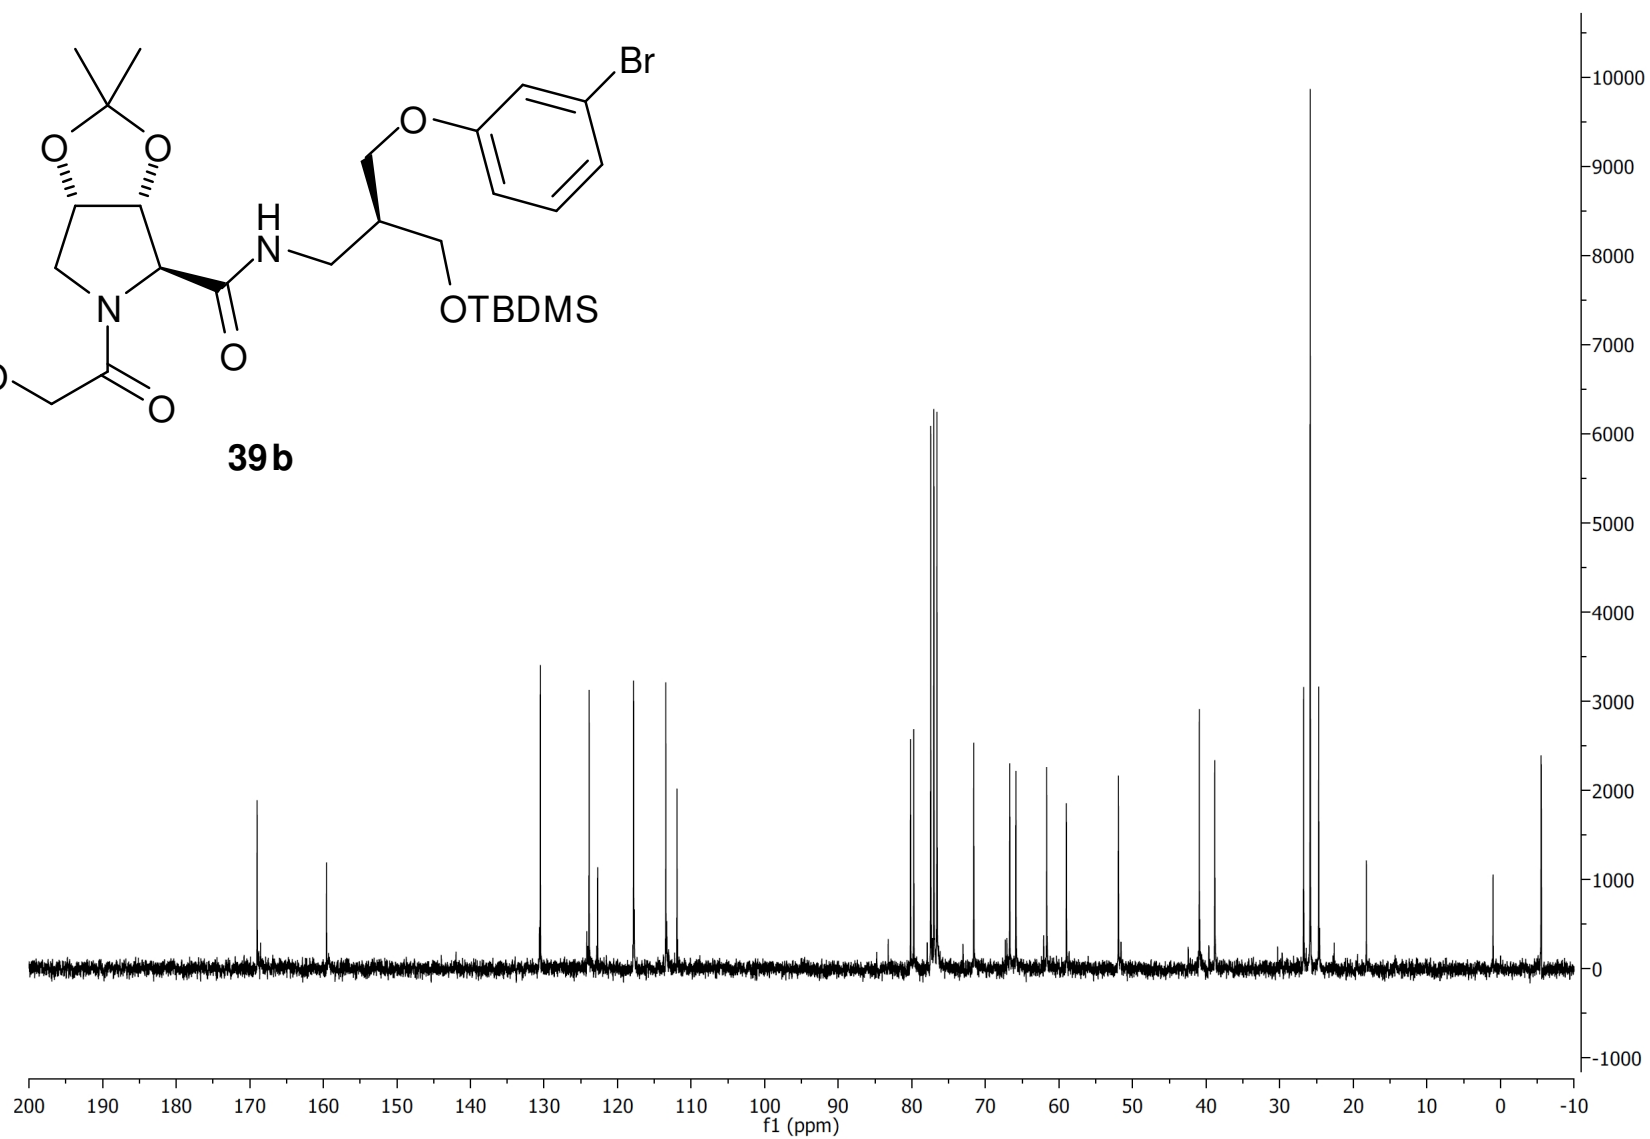

$^1\text{H}$  NMR of compound **40a**

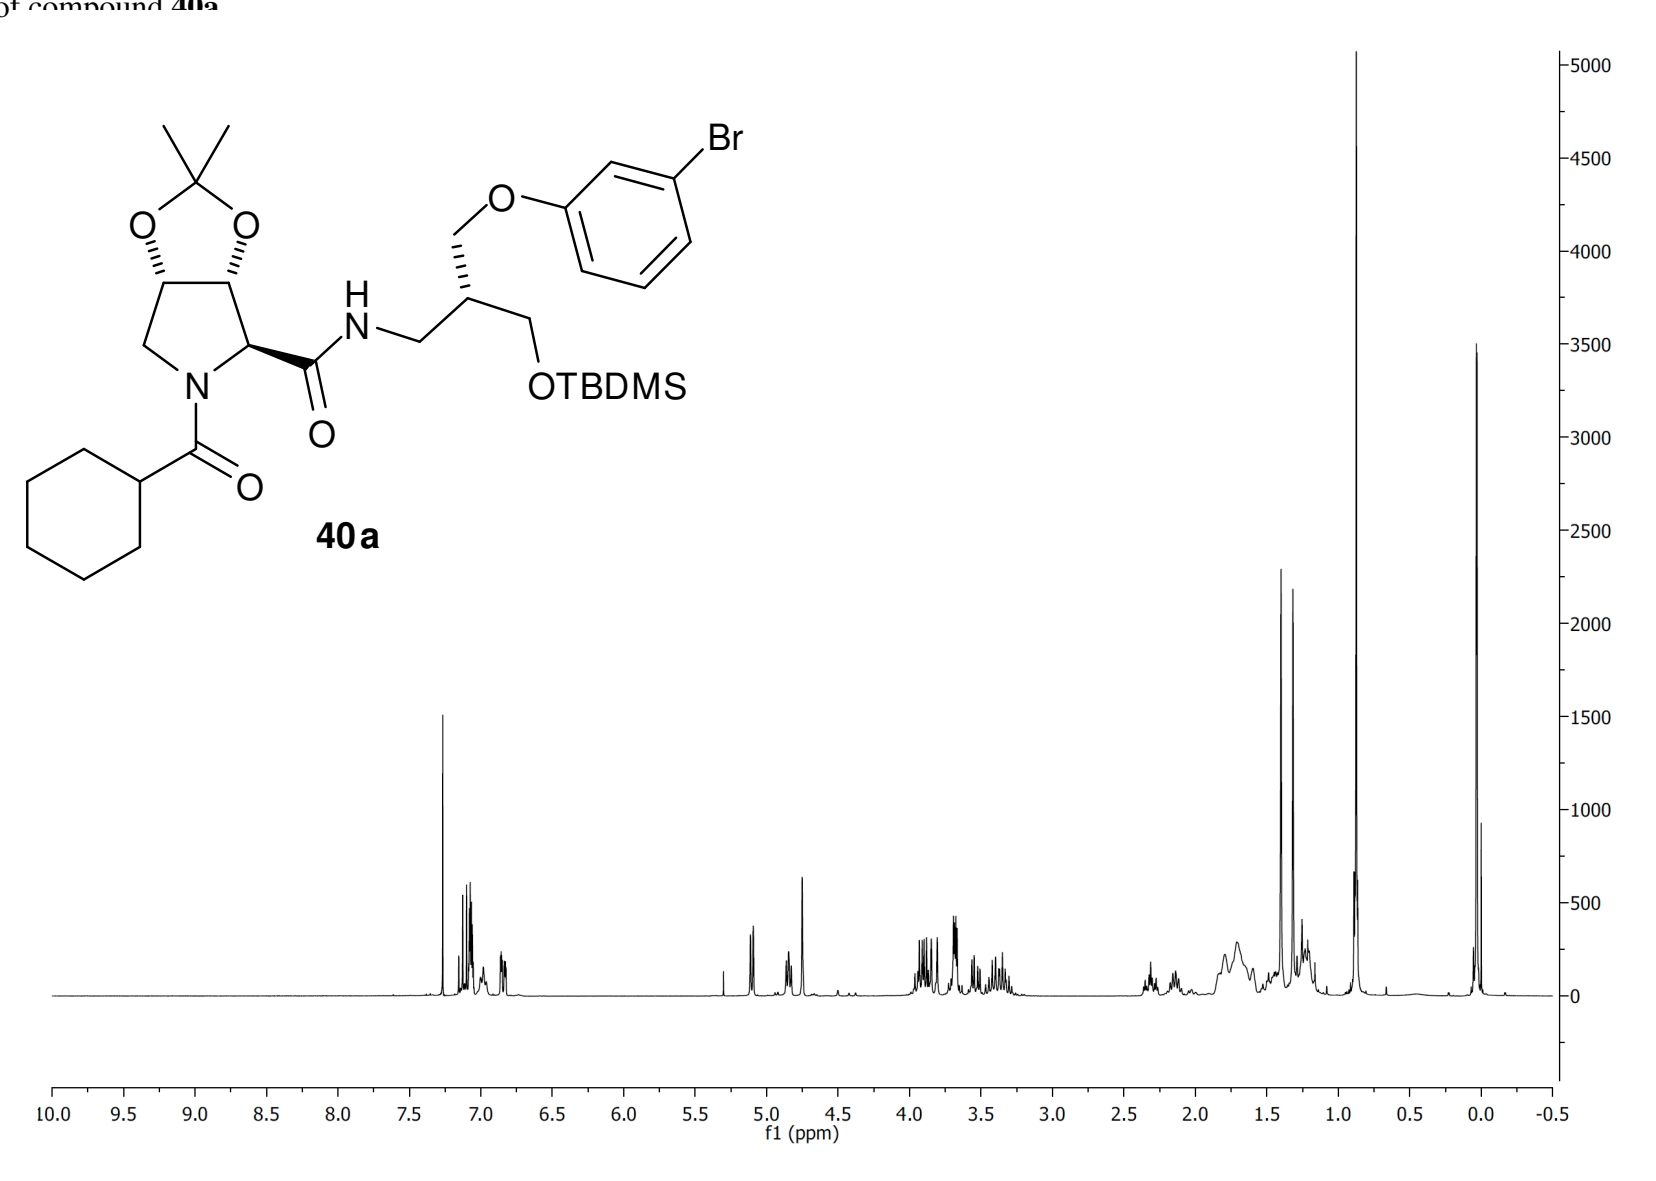

$^{13}\text{C}$  NMR of compound **40a**

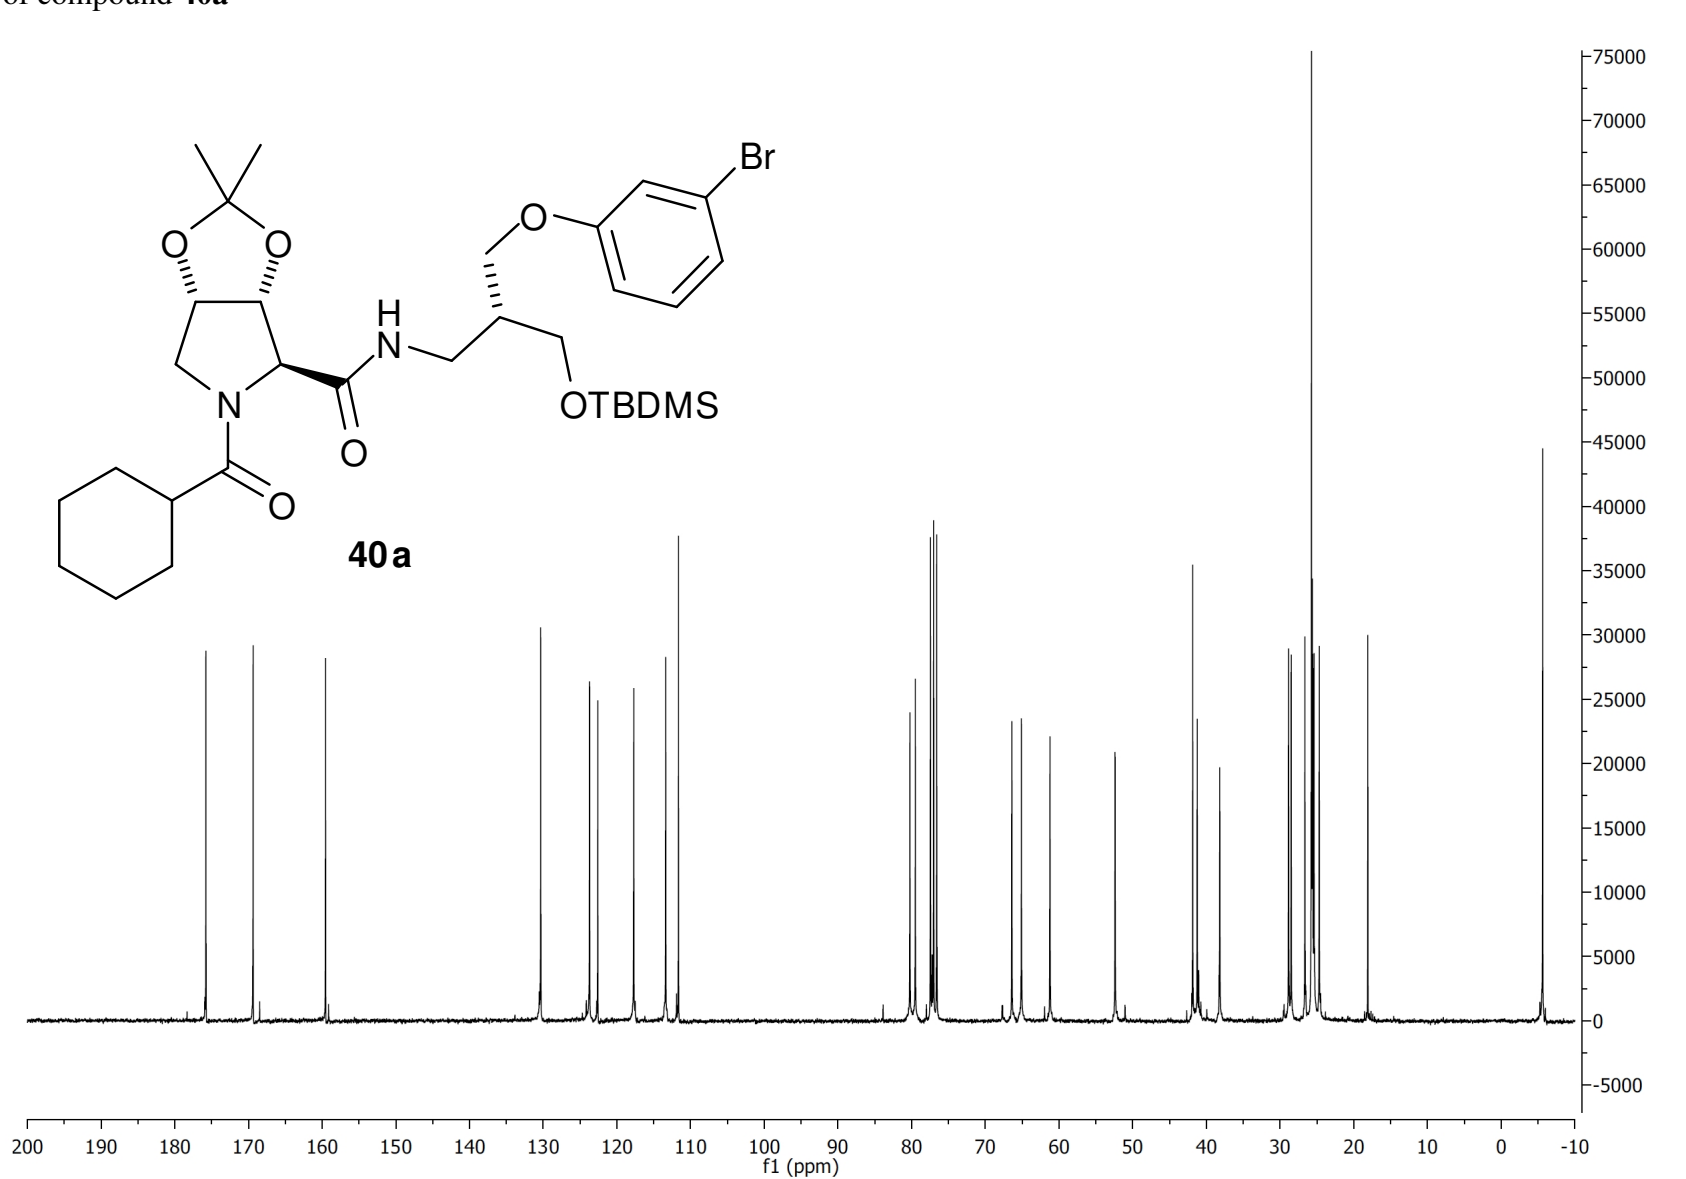

$^1\text{H}$  NMR of compound **40c**

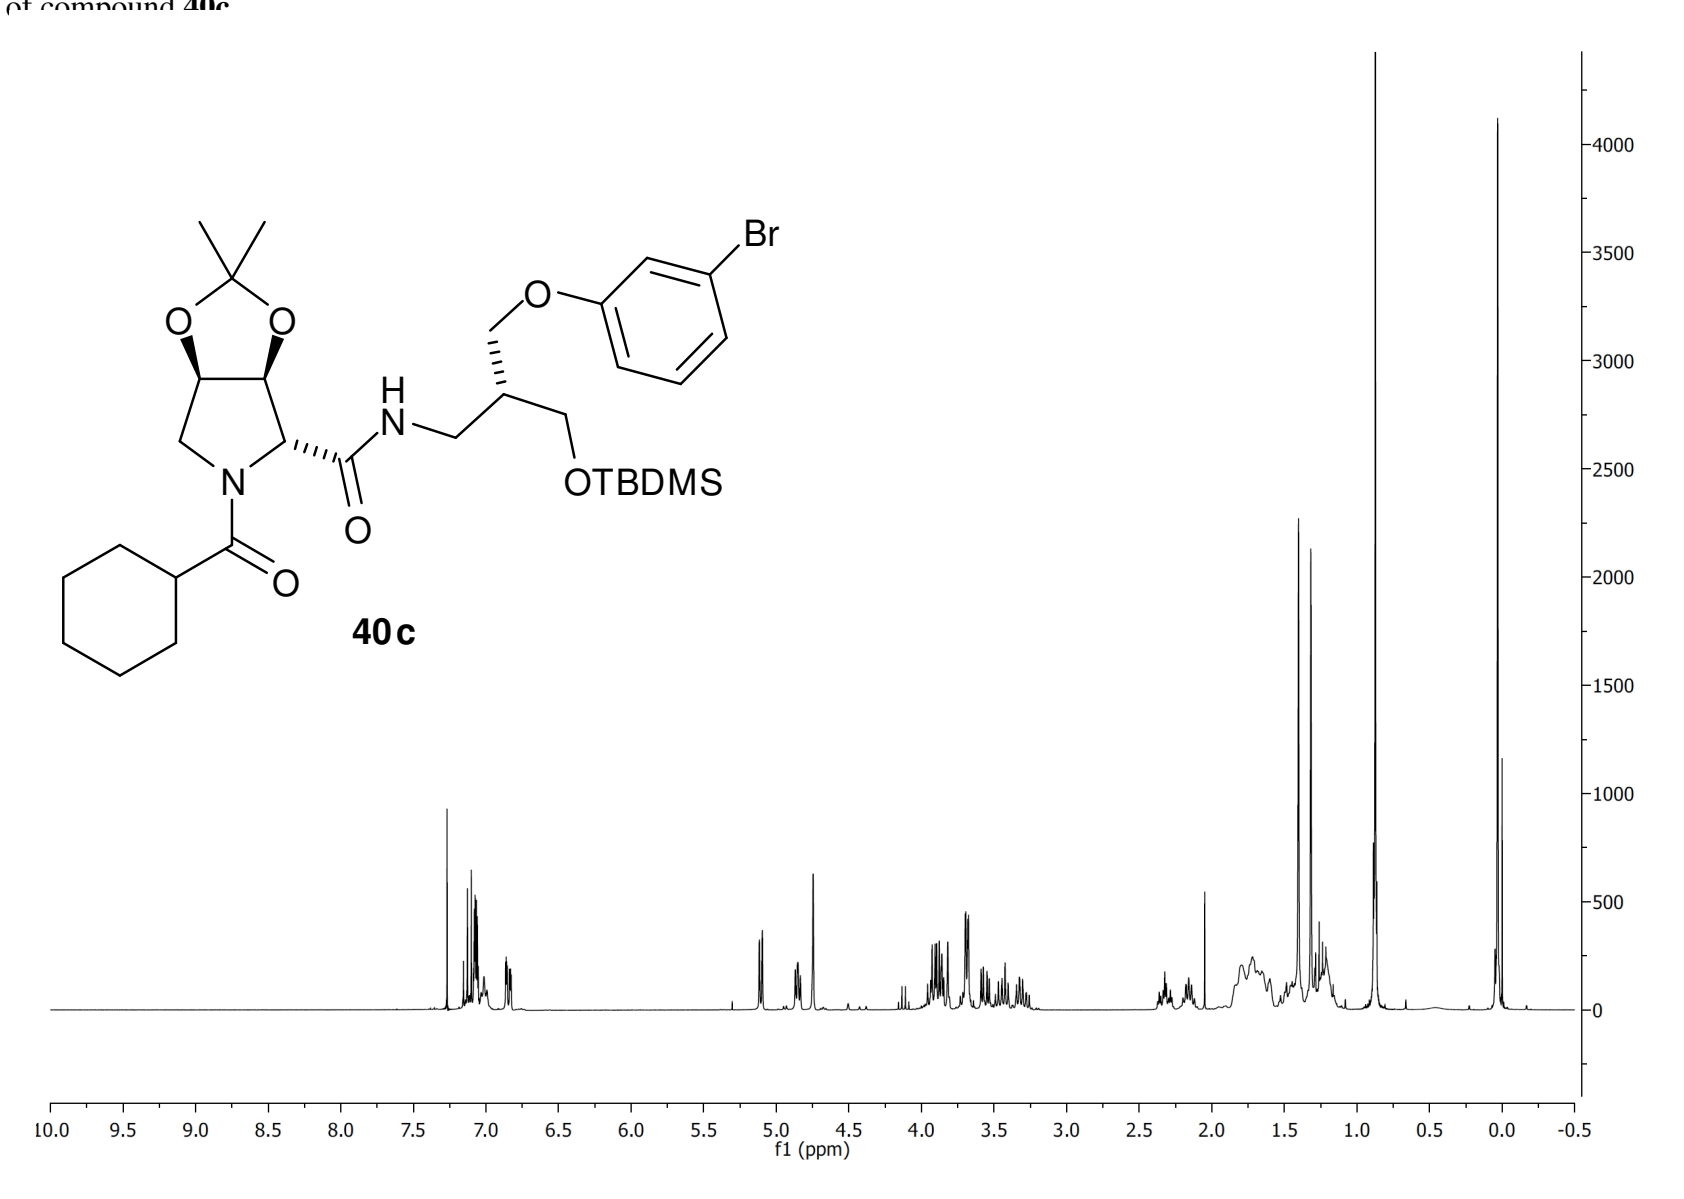

$^{13}\text{C}$  NMR of compound **40c**

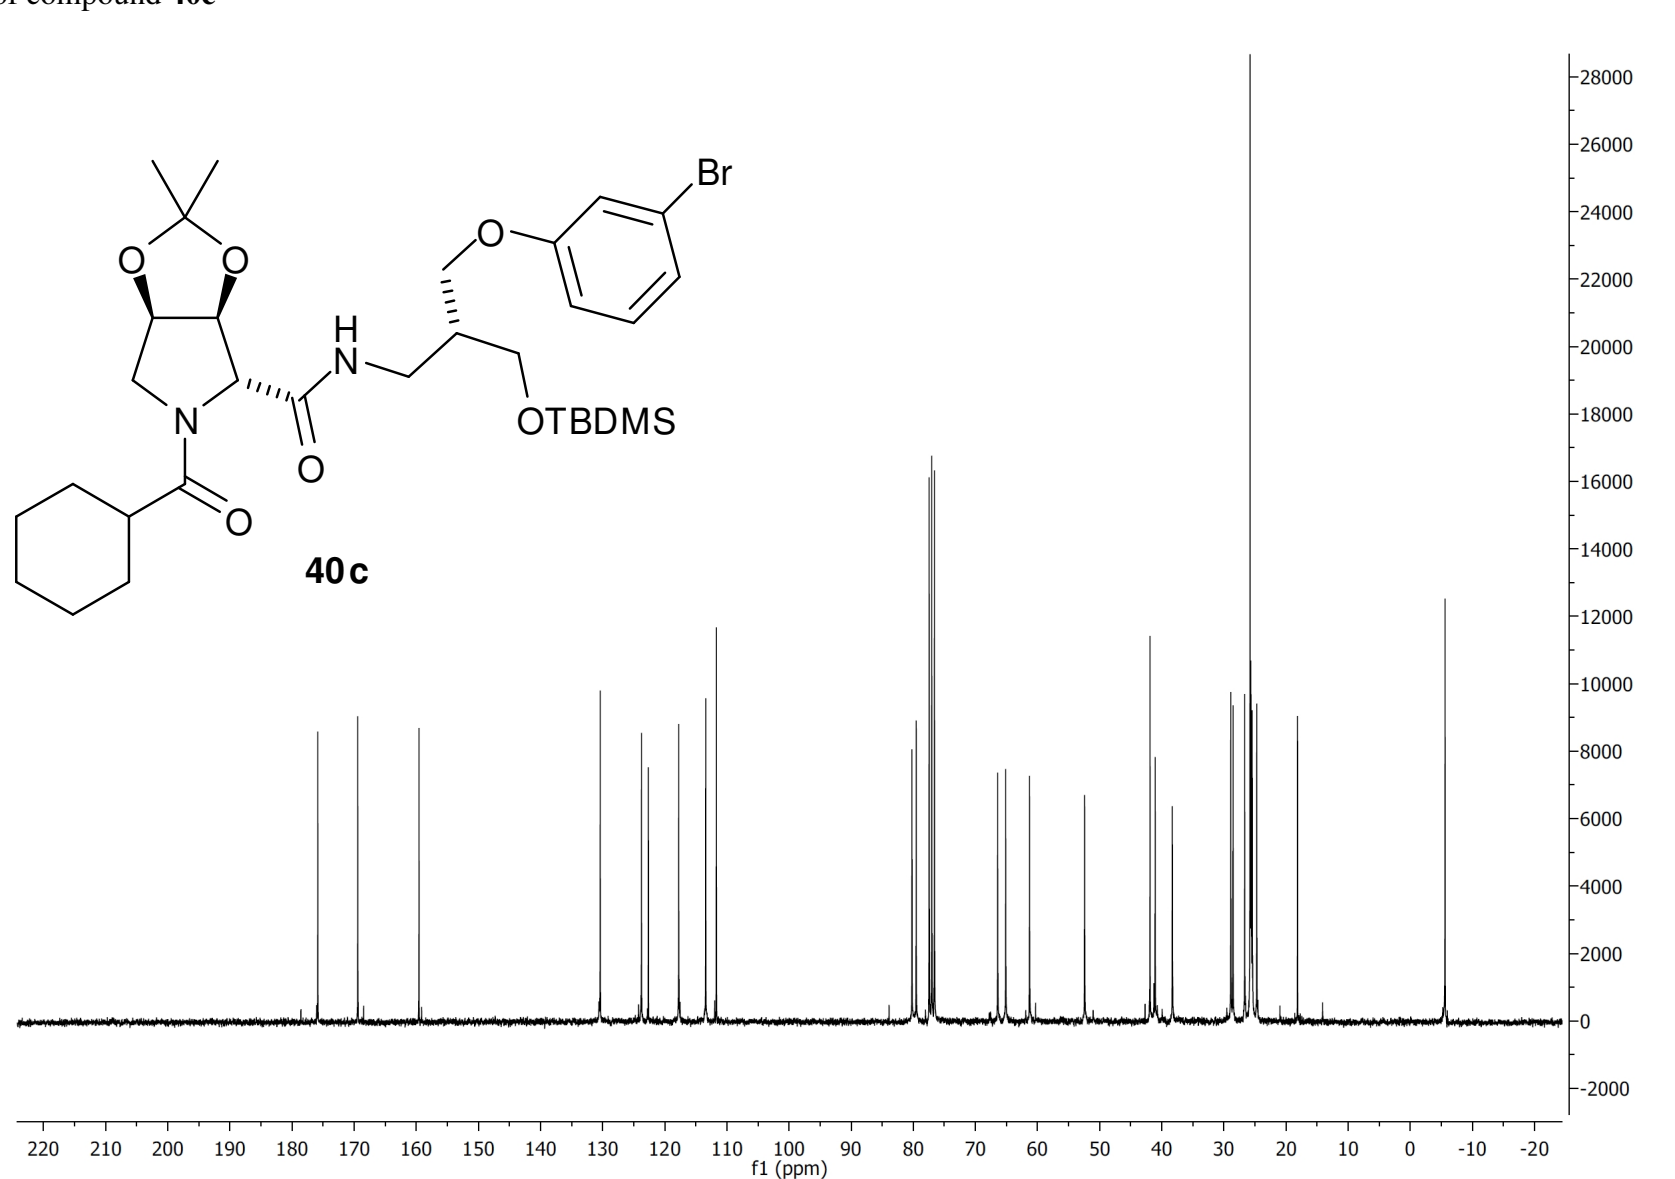

<sup>1</sup>H NMR of compound **41a**

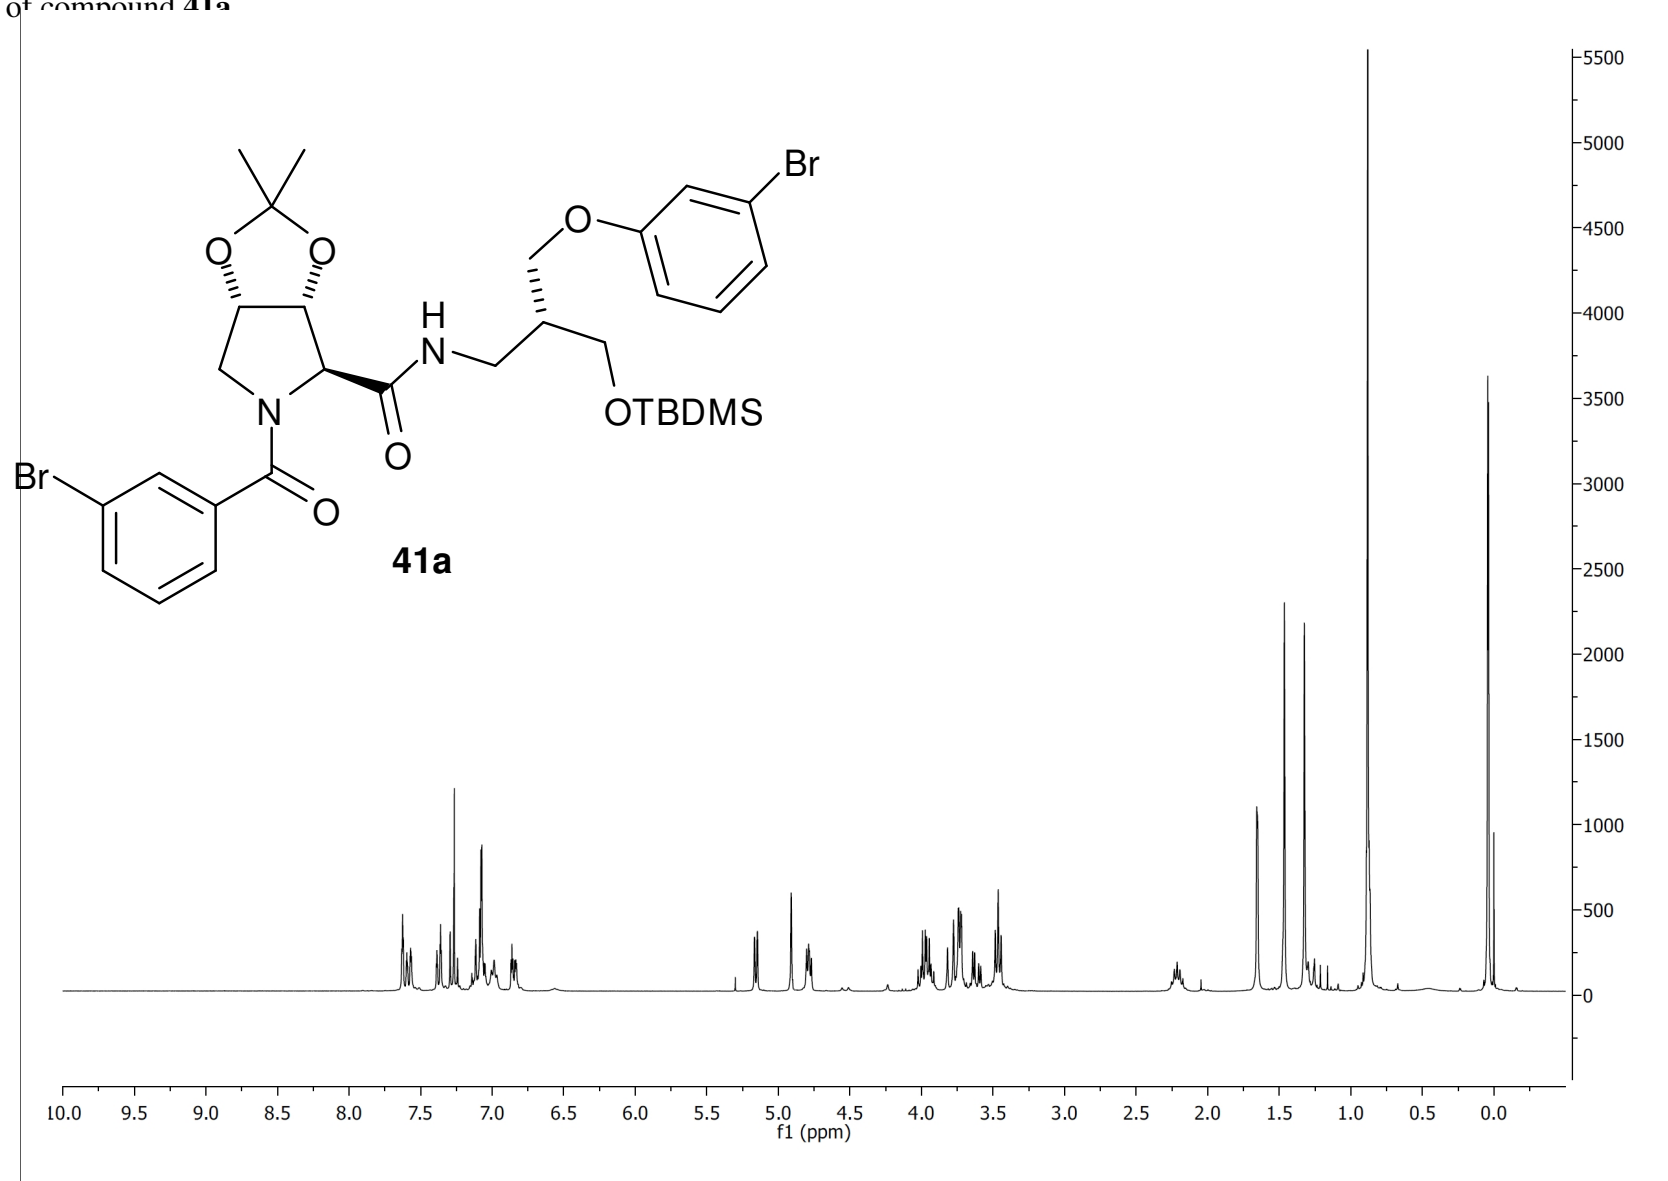



$^{13}\text{C}$  NMR of compound **41a**

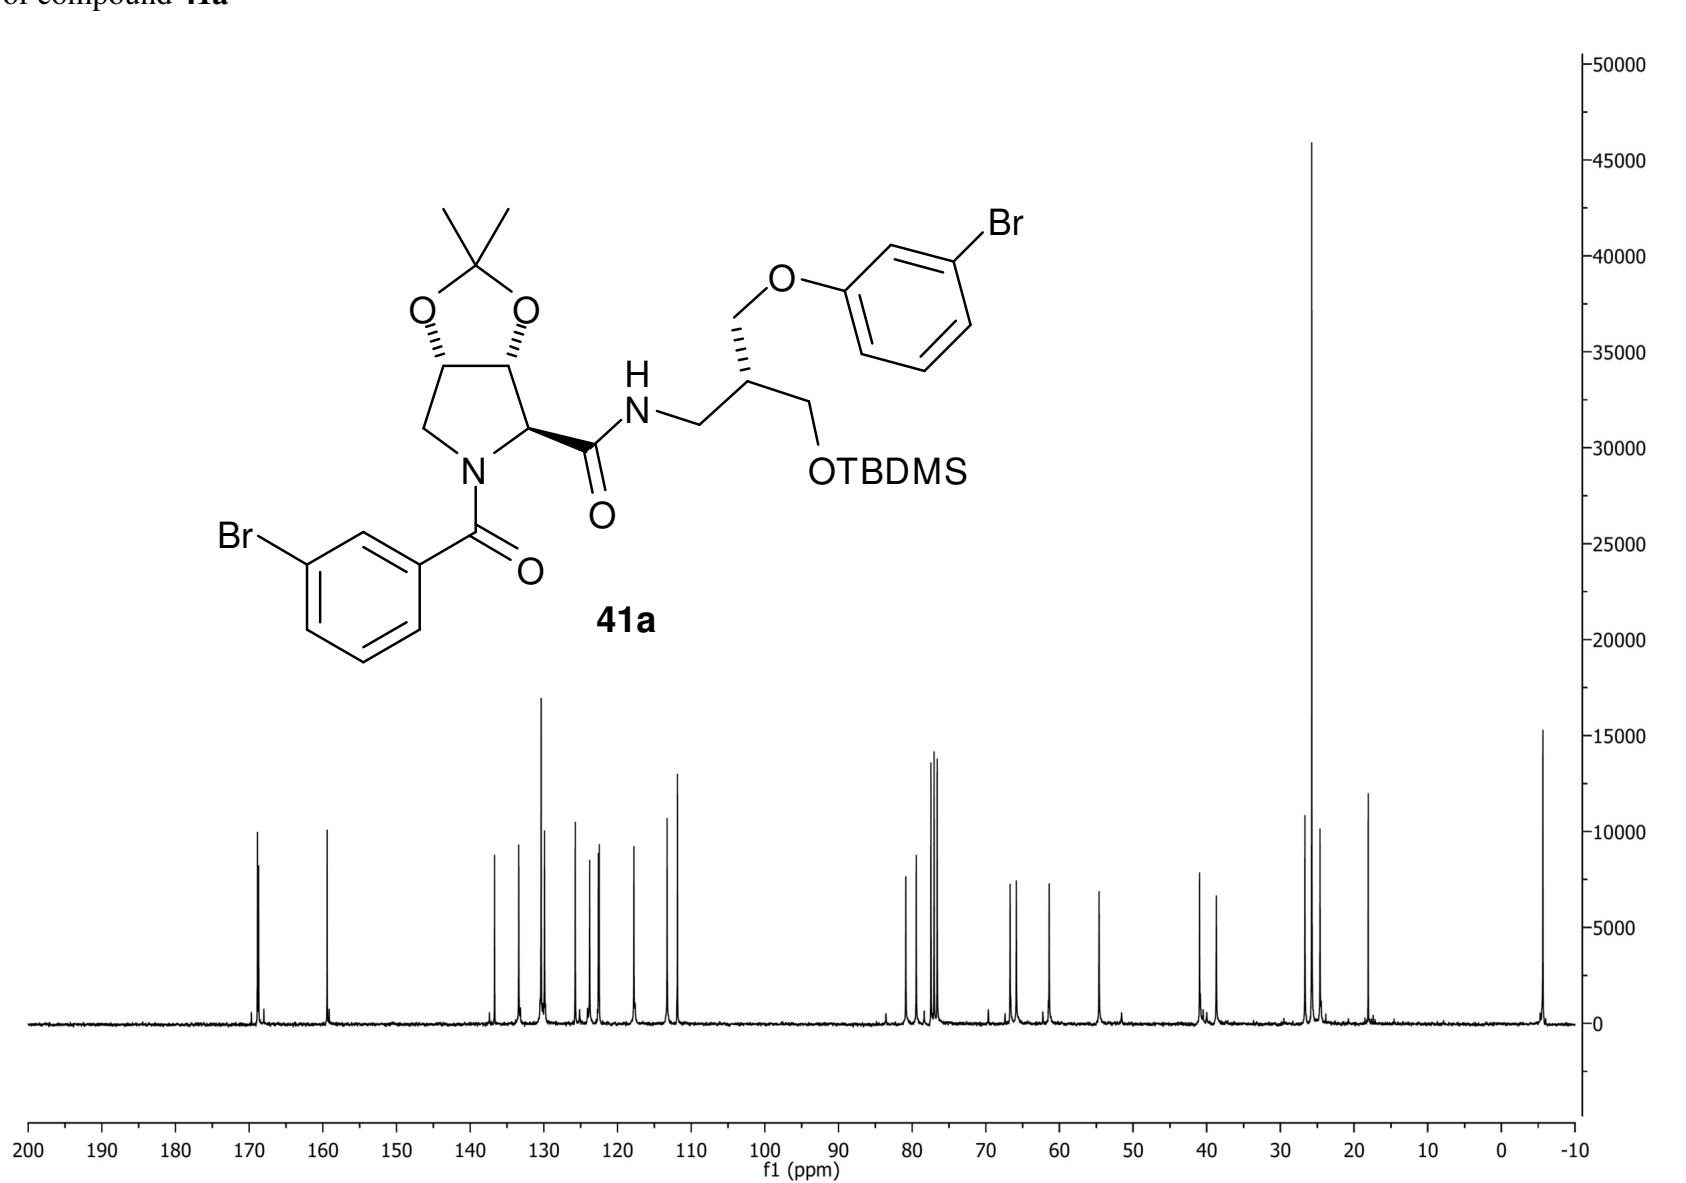



$^{13}\text{C}$  NMR of compound **41c**

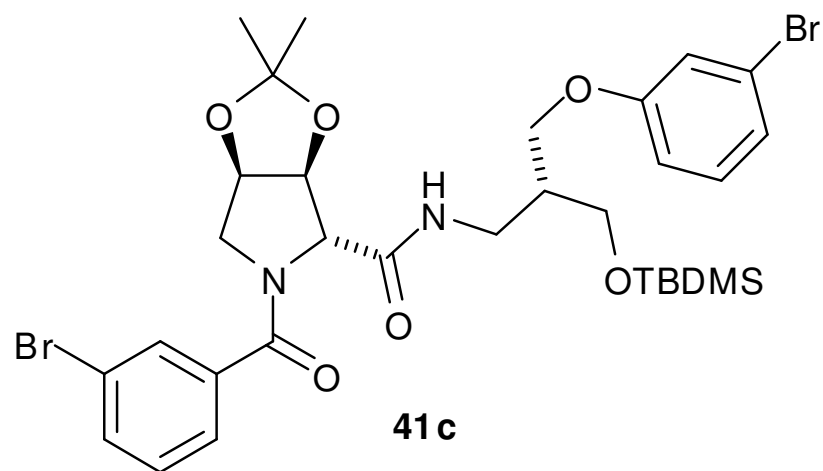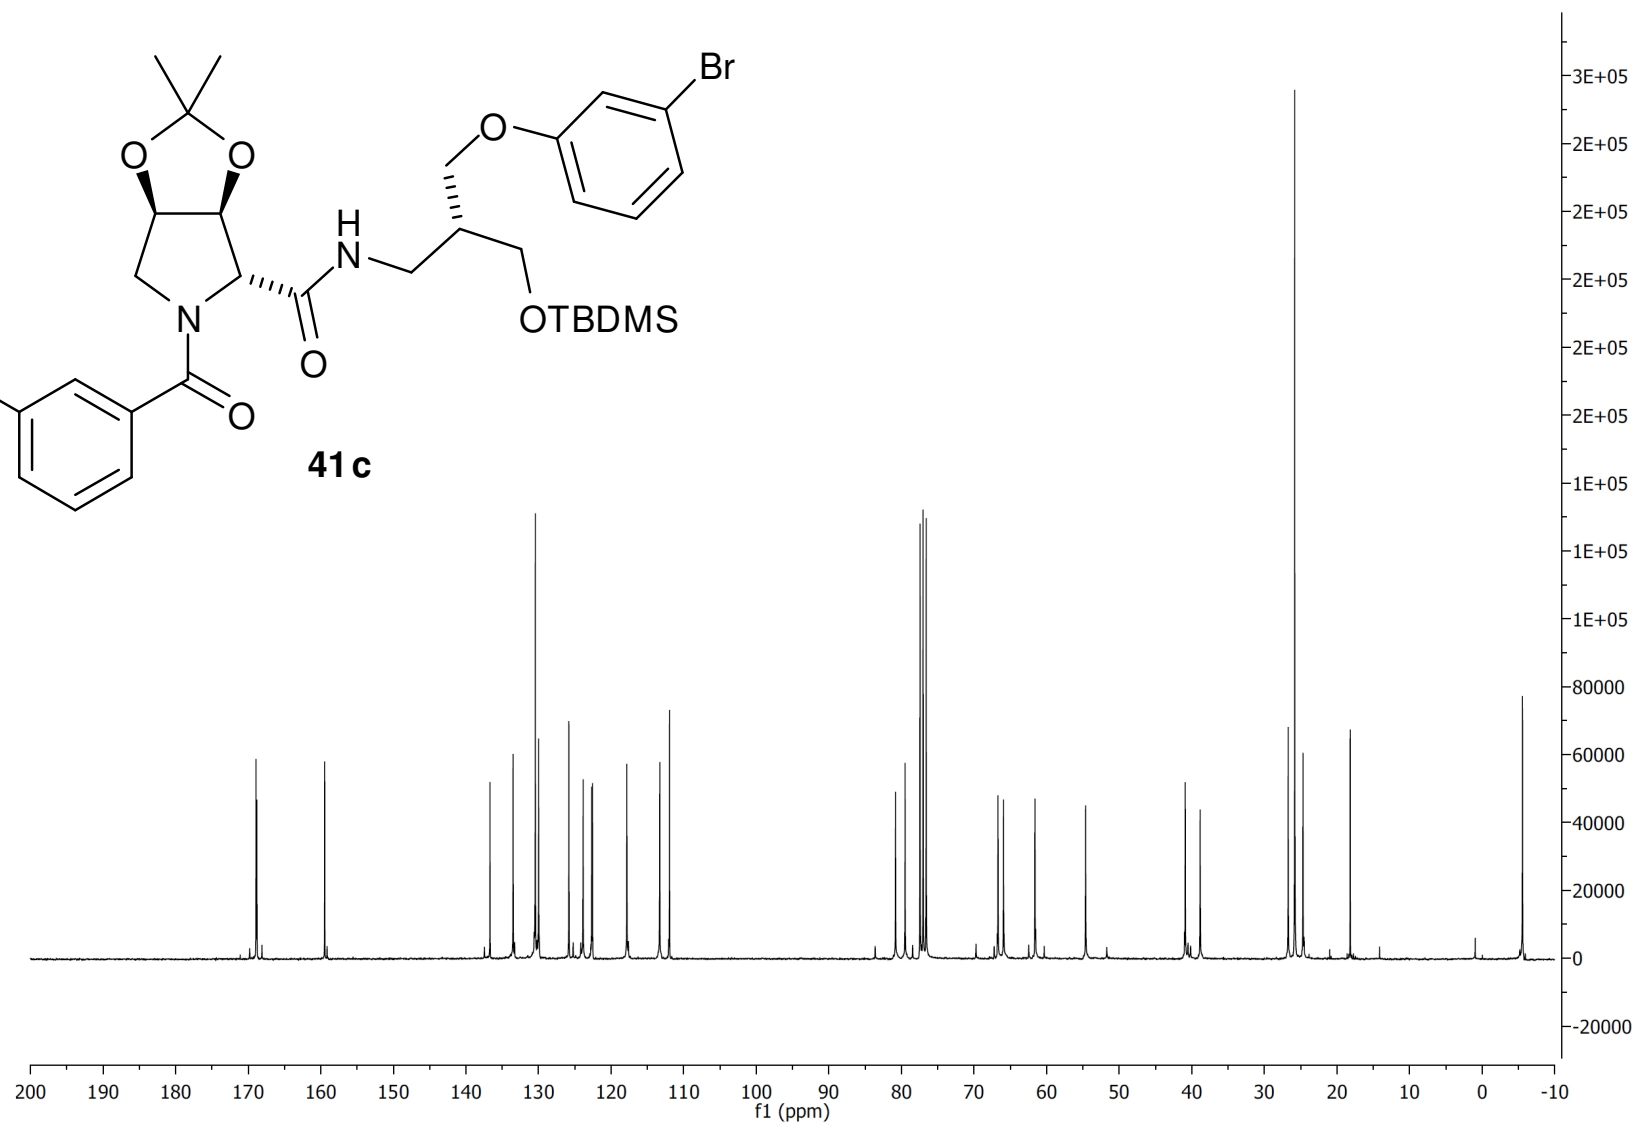

$^1\text{H}$  NMR of compound **42a**

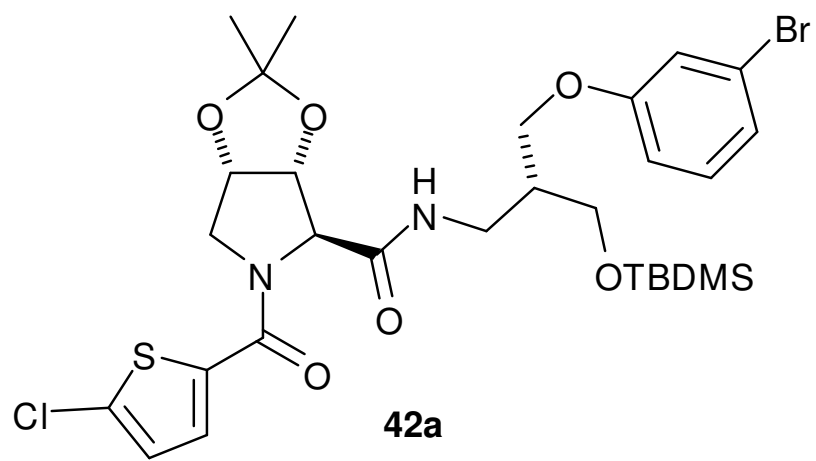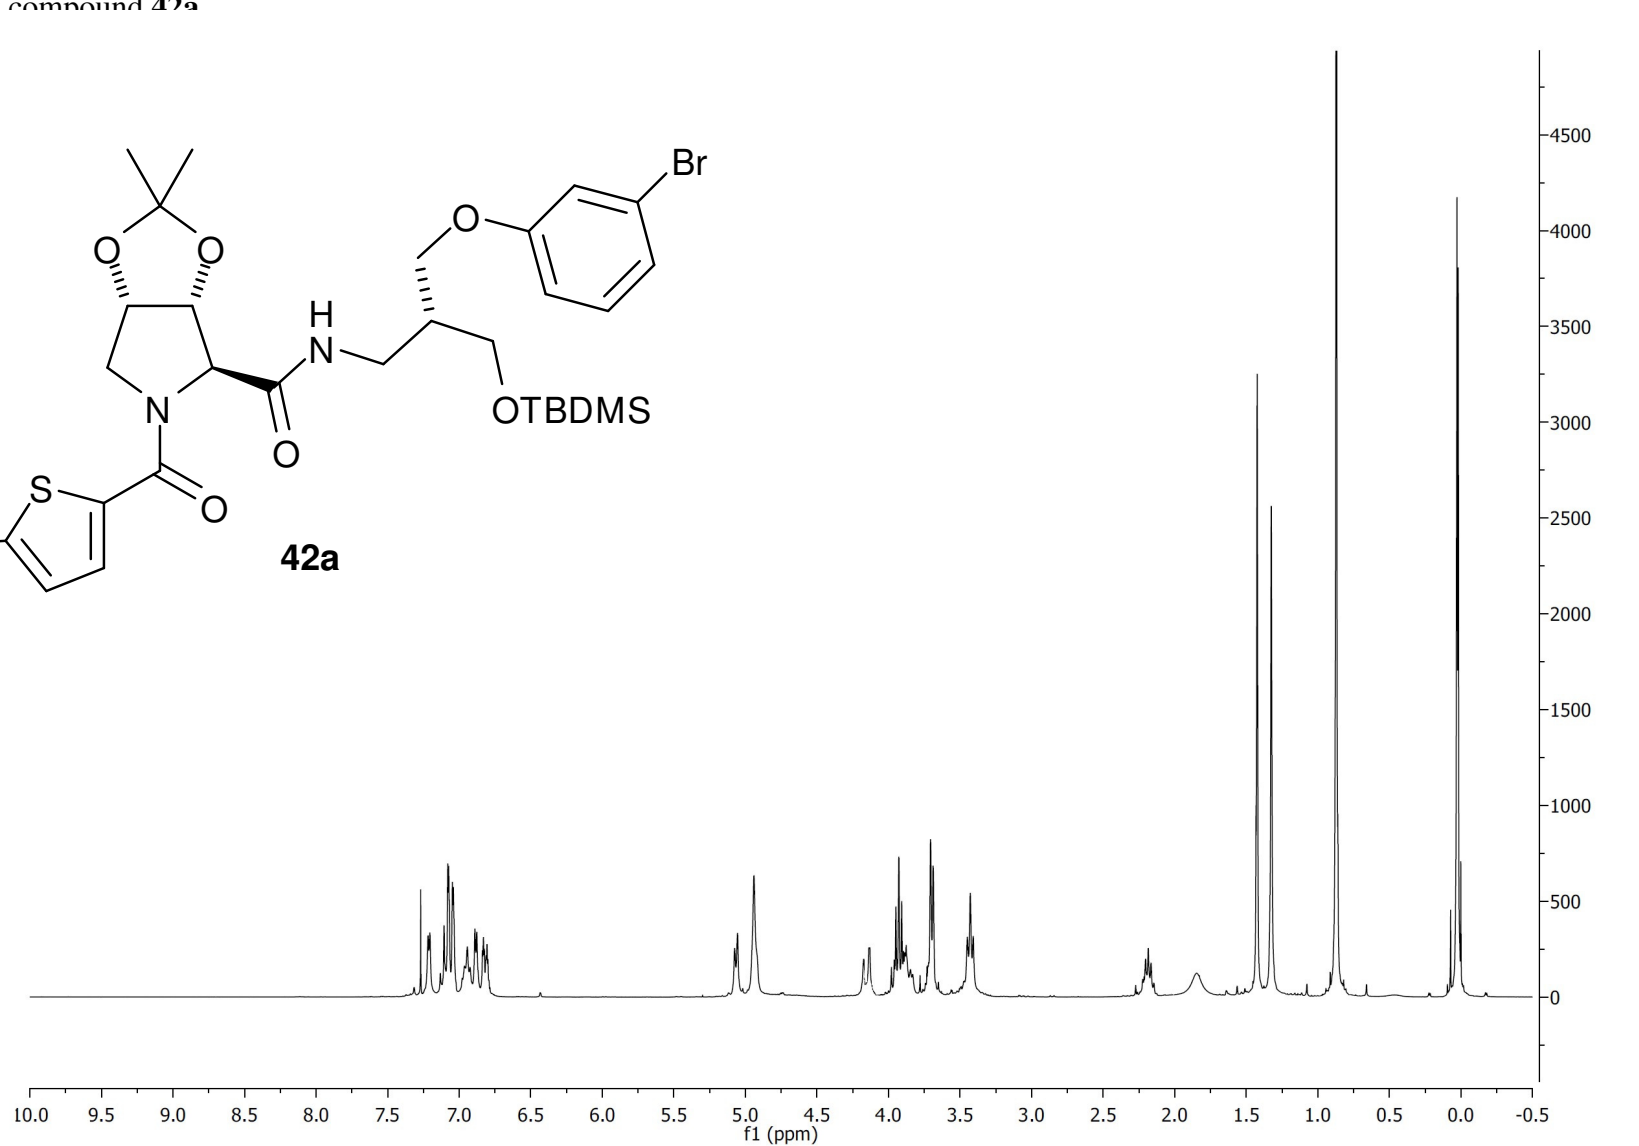

$^{13}\text{C}$  NMR of compound **42a**

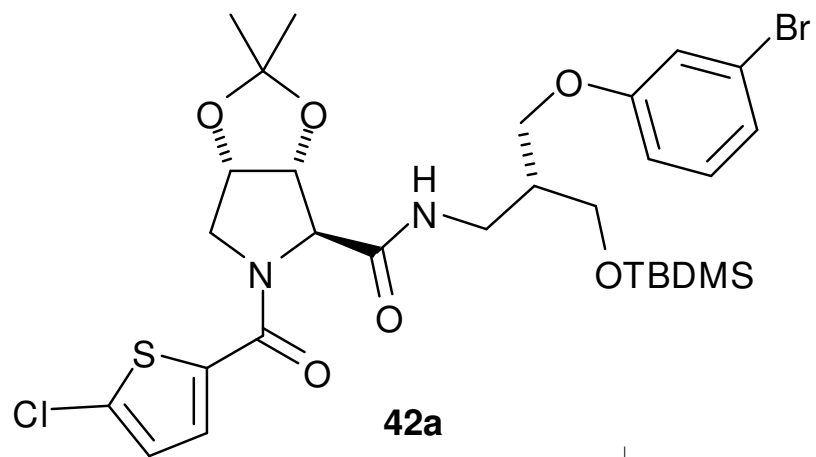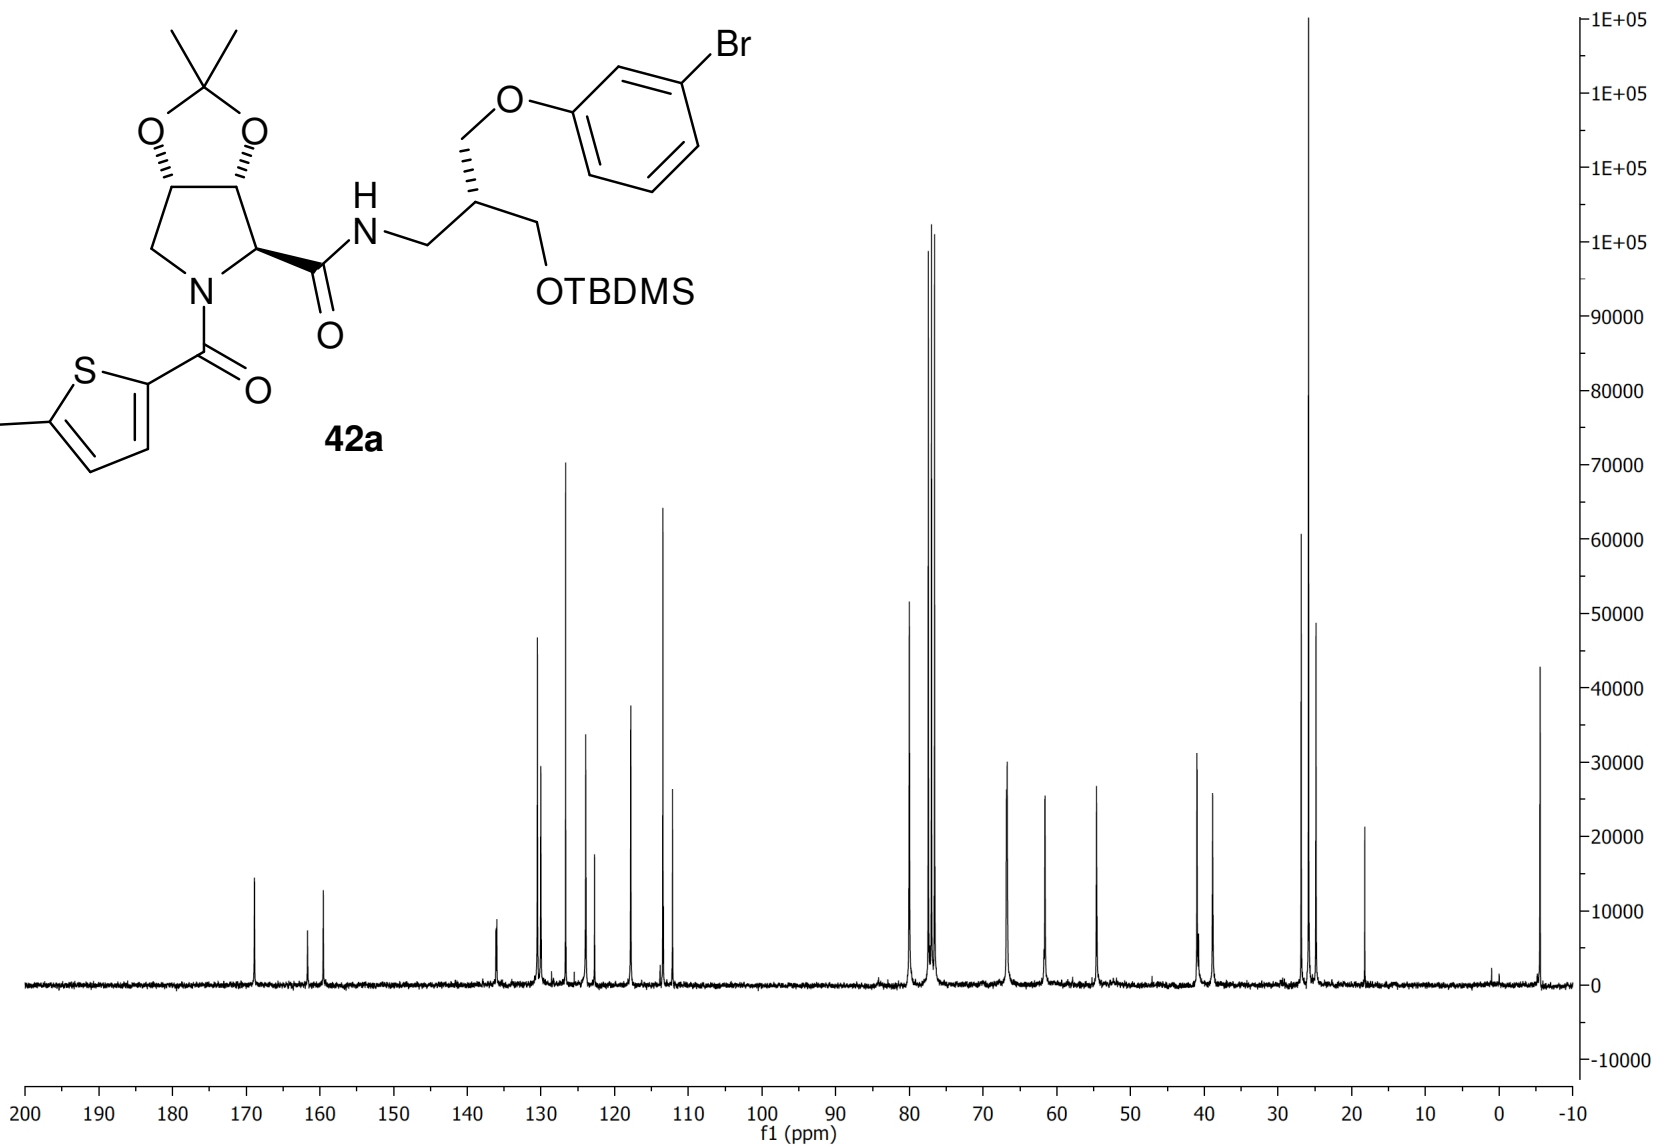

<sup>1</sup>H NMR of compound **42c**

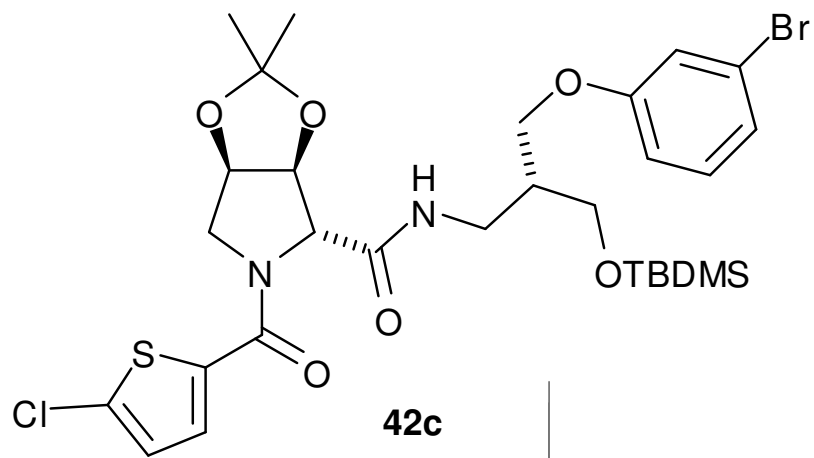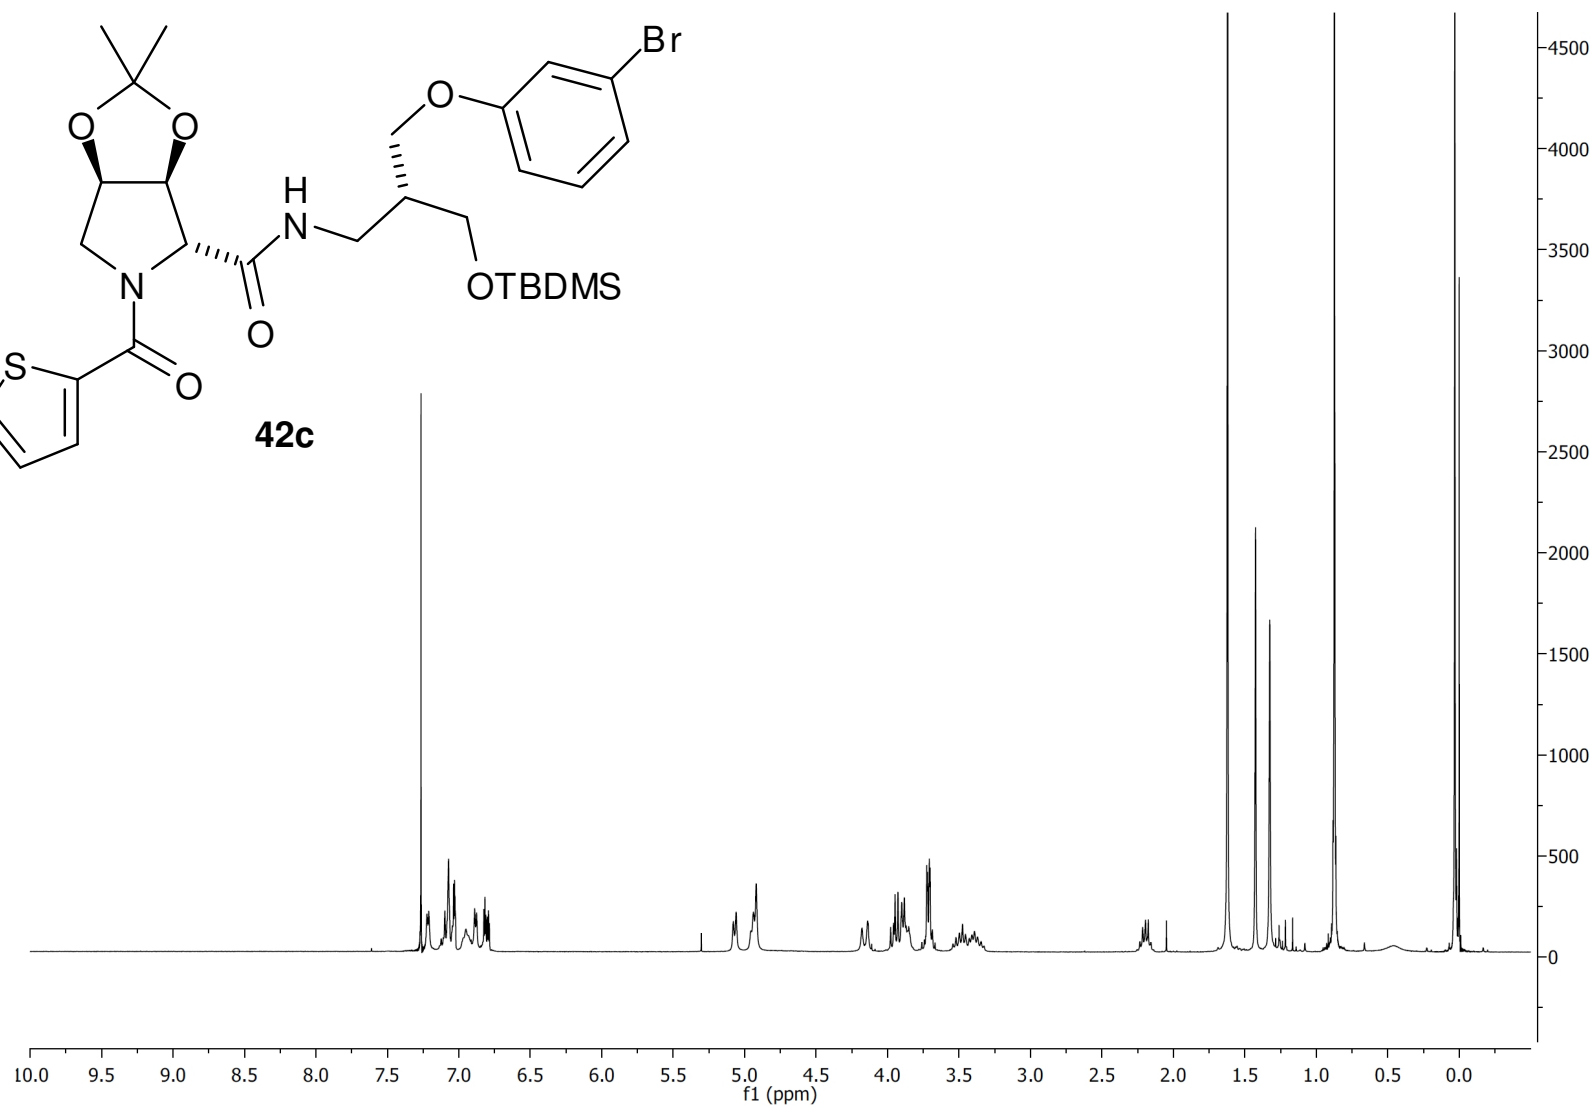

$^{13}\text{C}$  NMR of compound **42c**

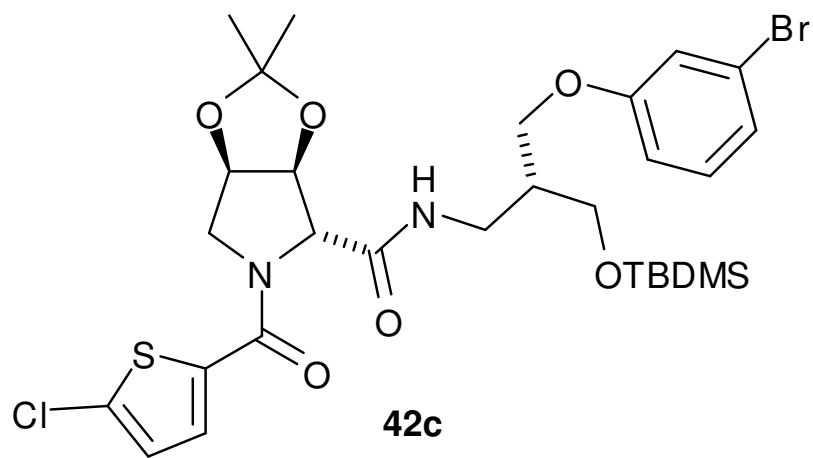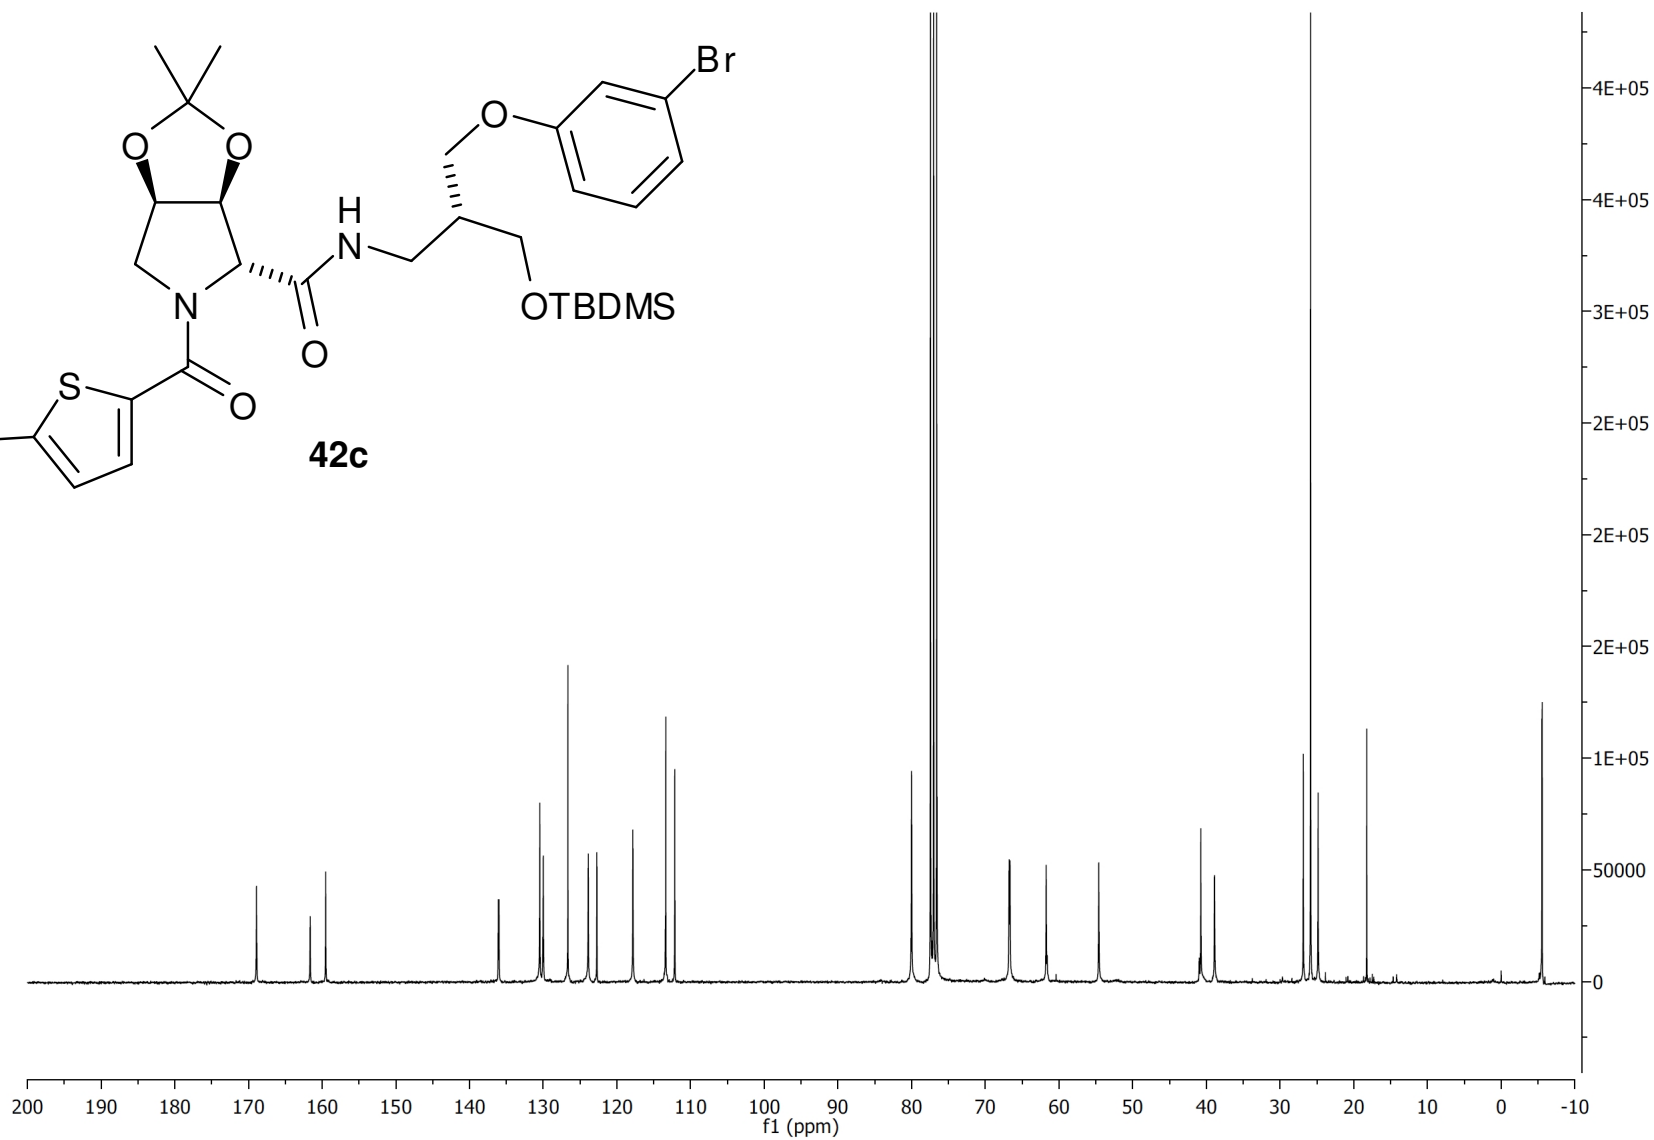

<sup>1</sup>H NMR of compound **43a**

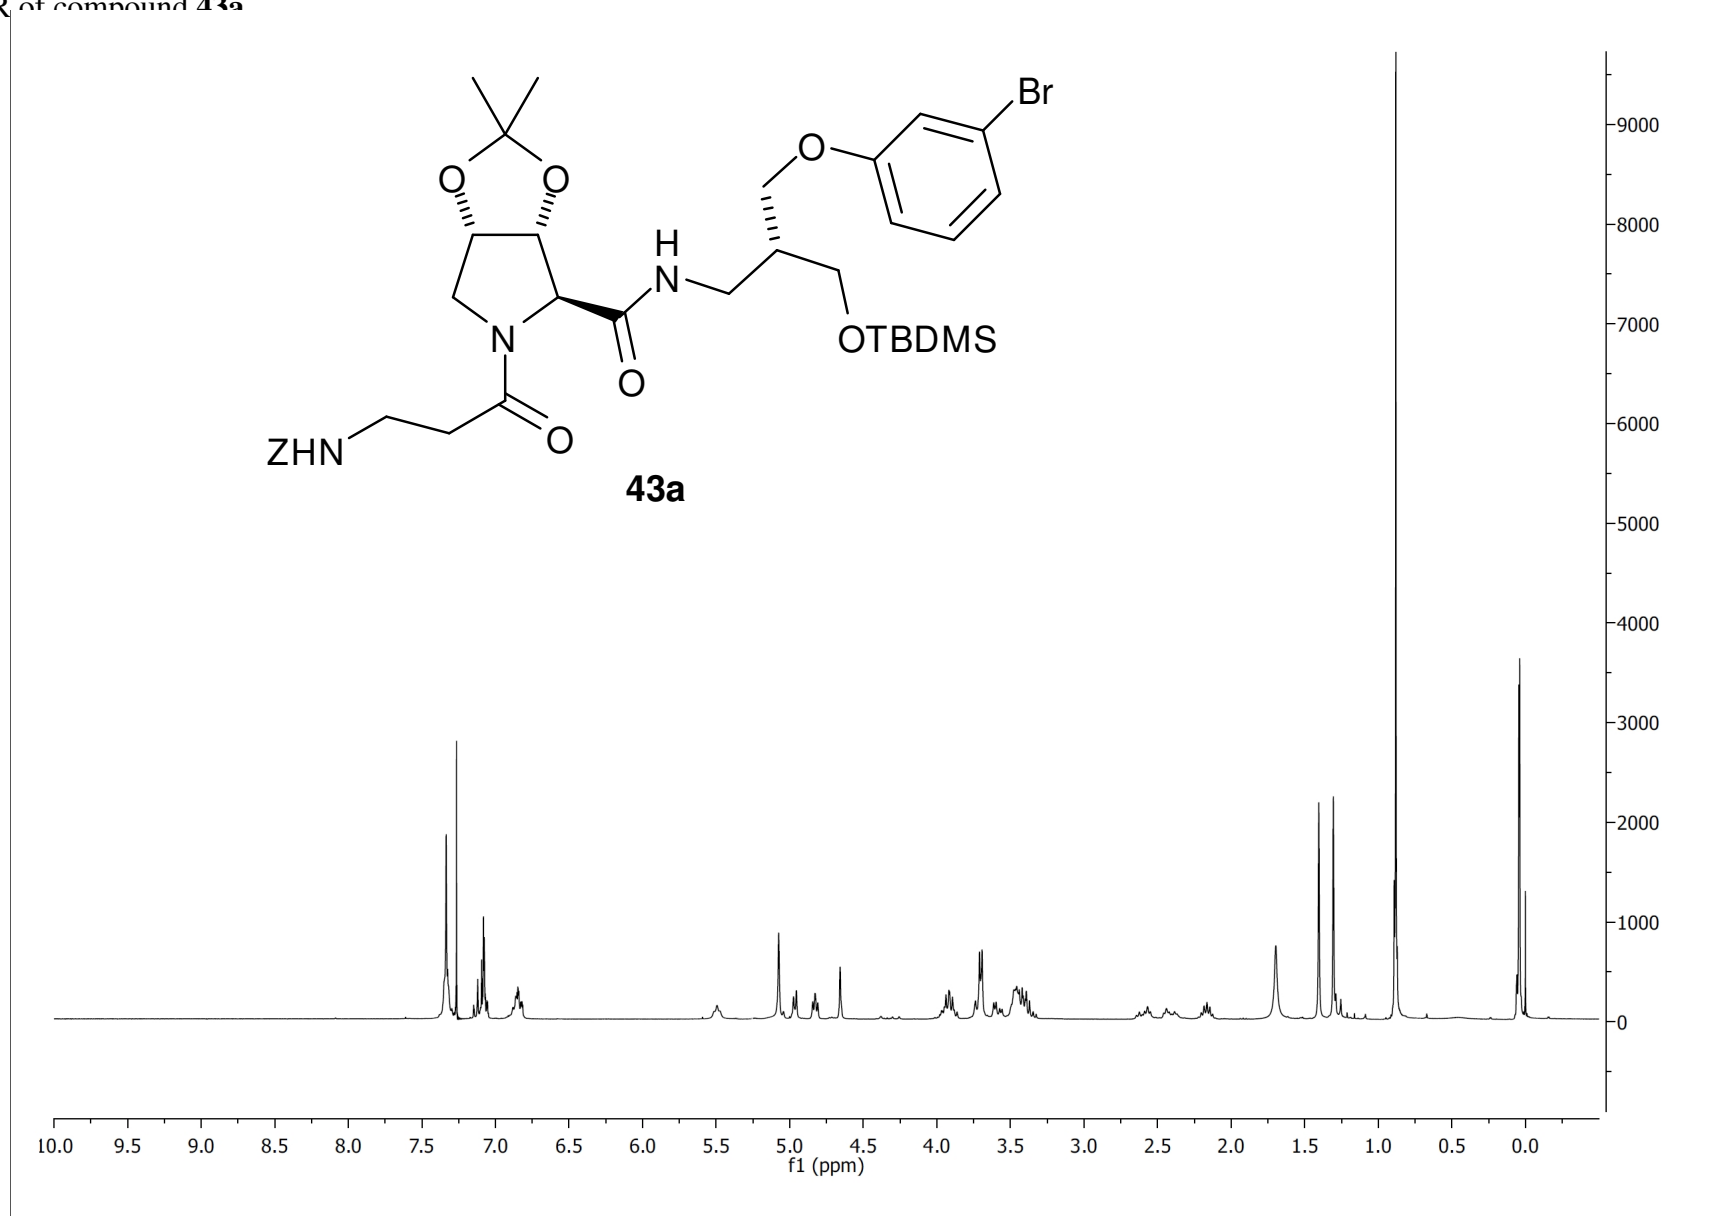



$^{13}\text{C}$  NMR of compound **43a**

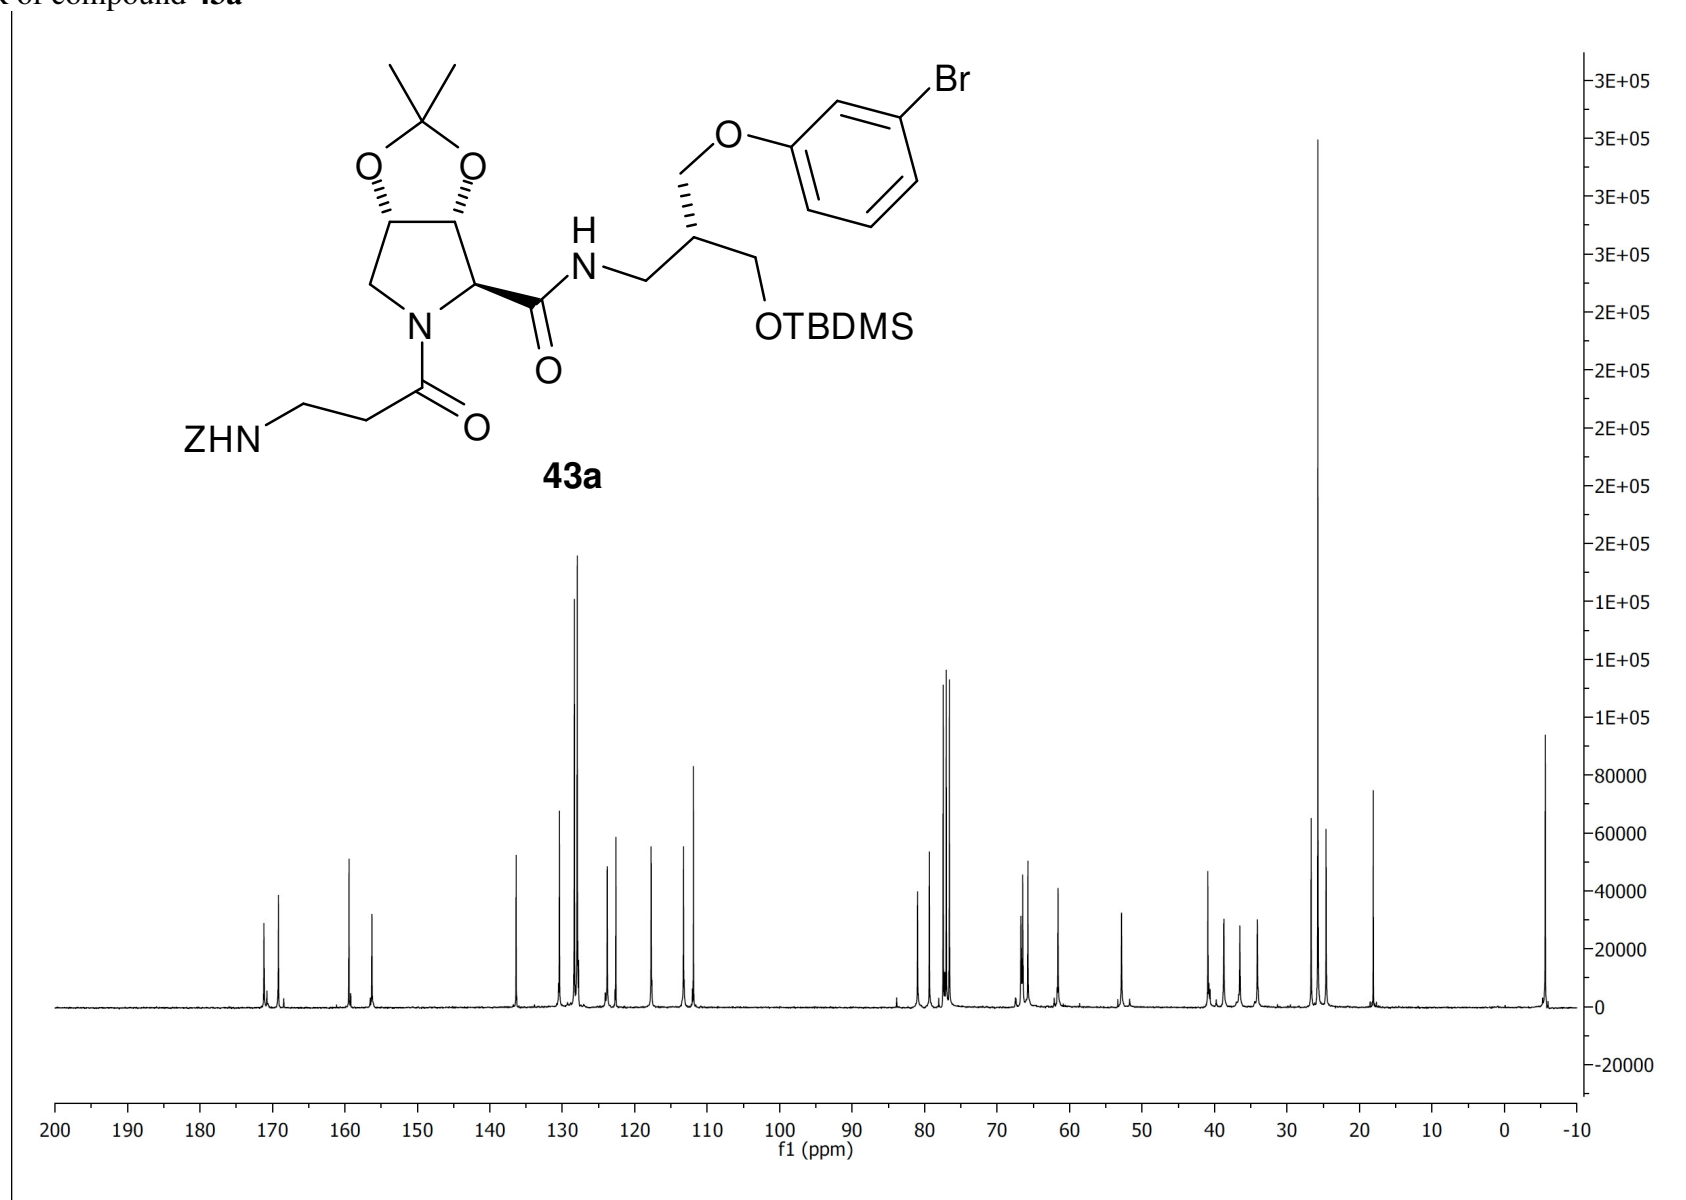

<sup>1</sup>H NMR of compound **43c**

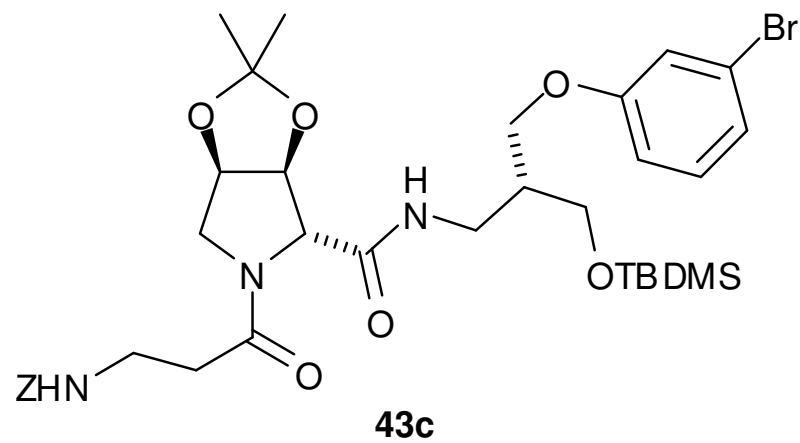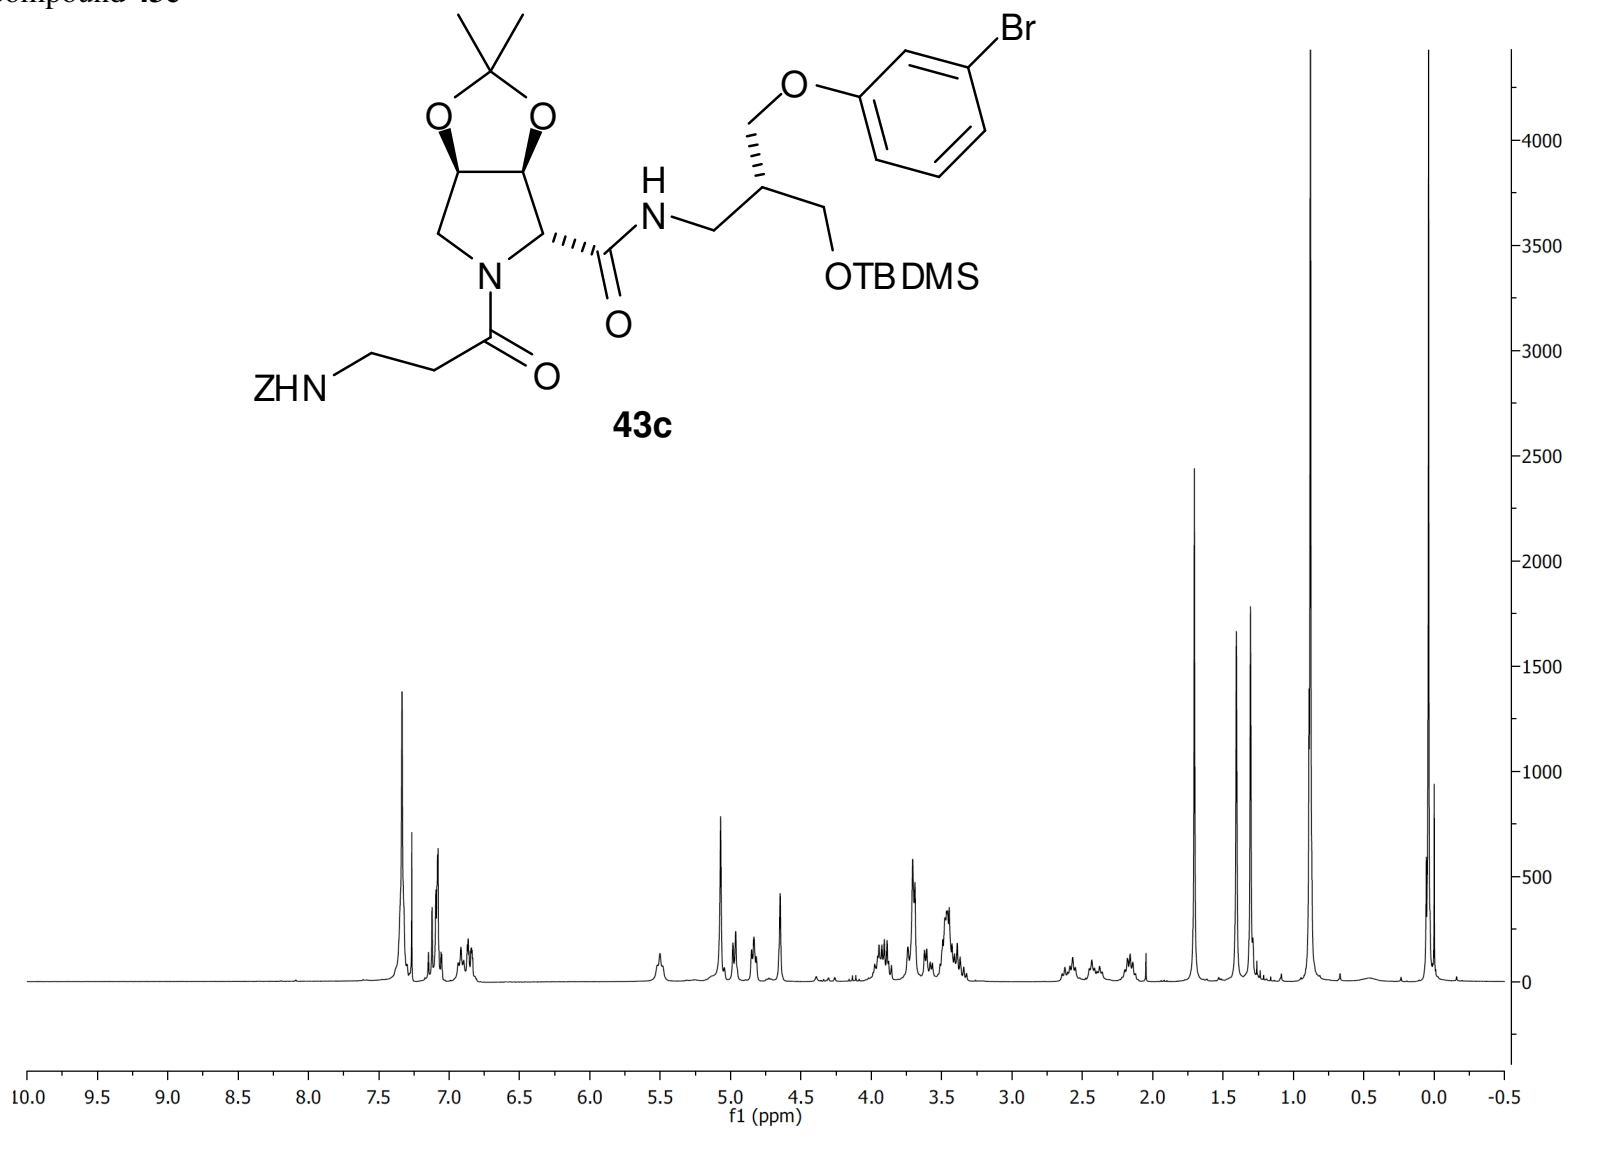

$^{13}\text{C}$  NMR of compound **43c**

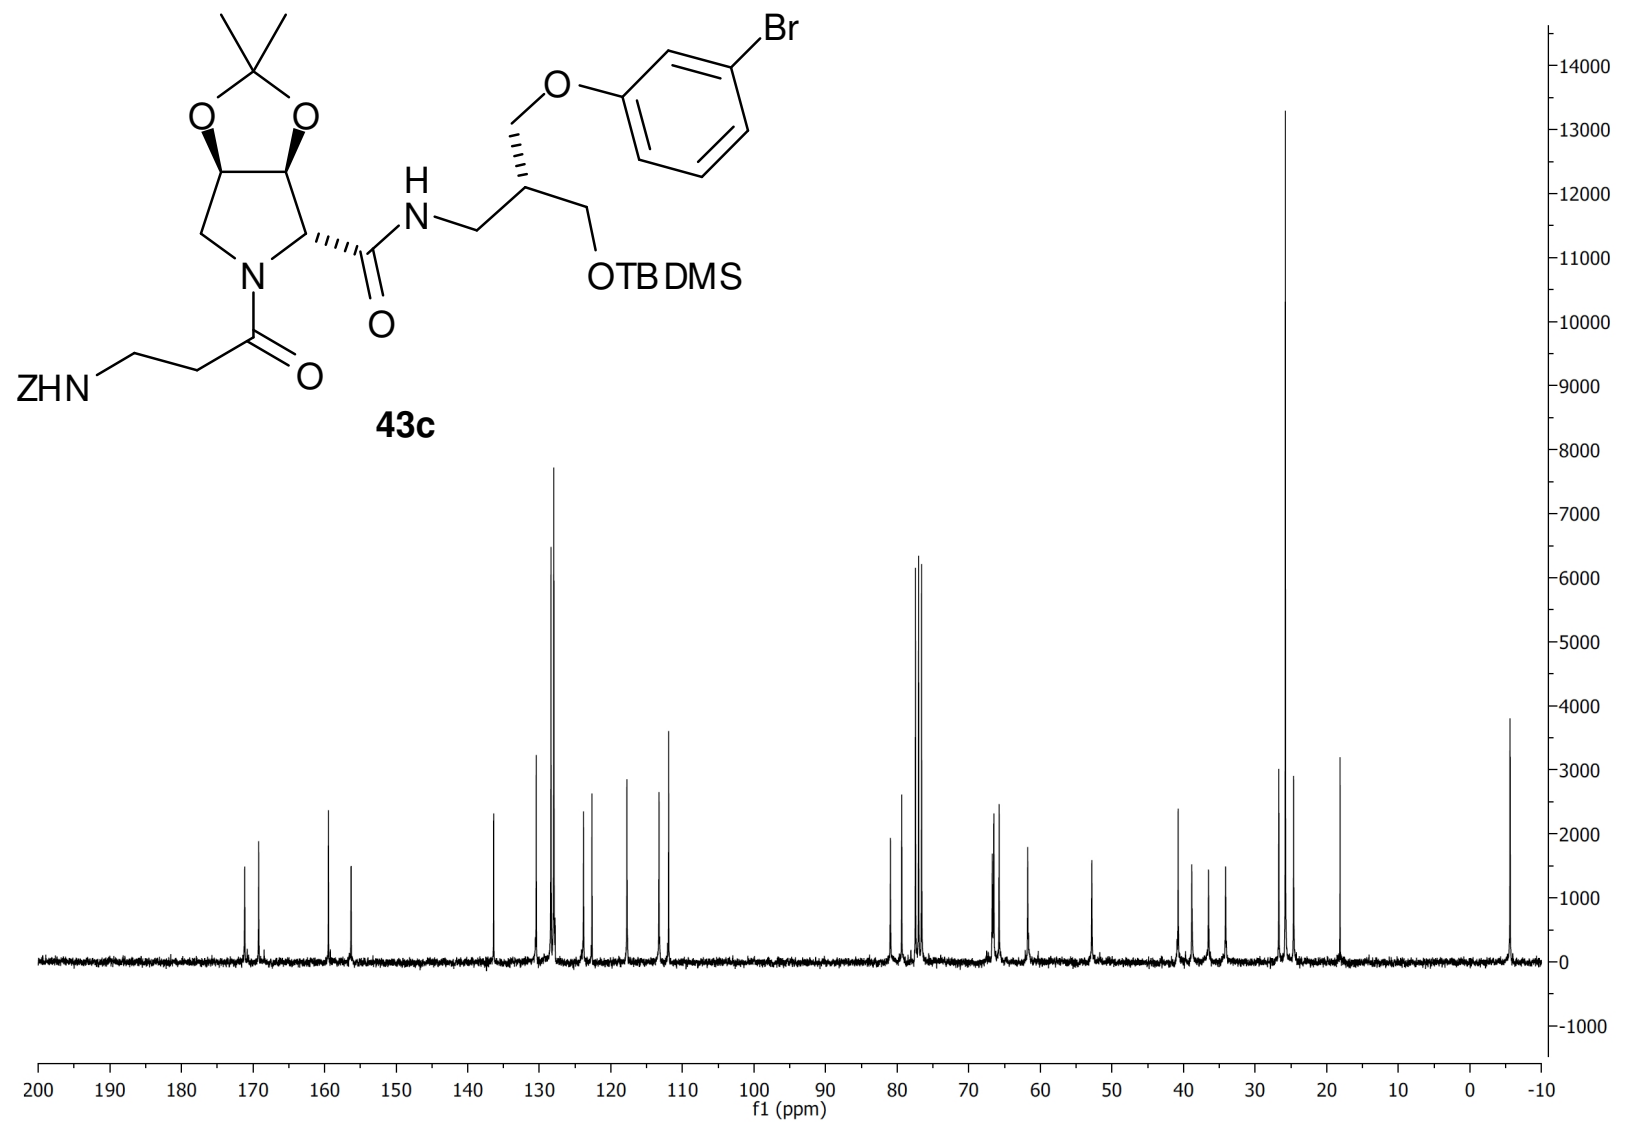

<sup>1</sup>H NMR of compound **44a**

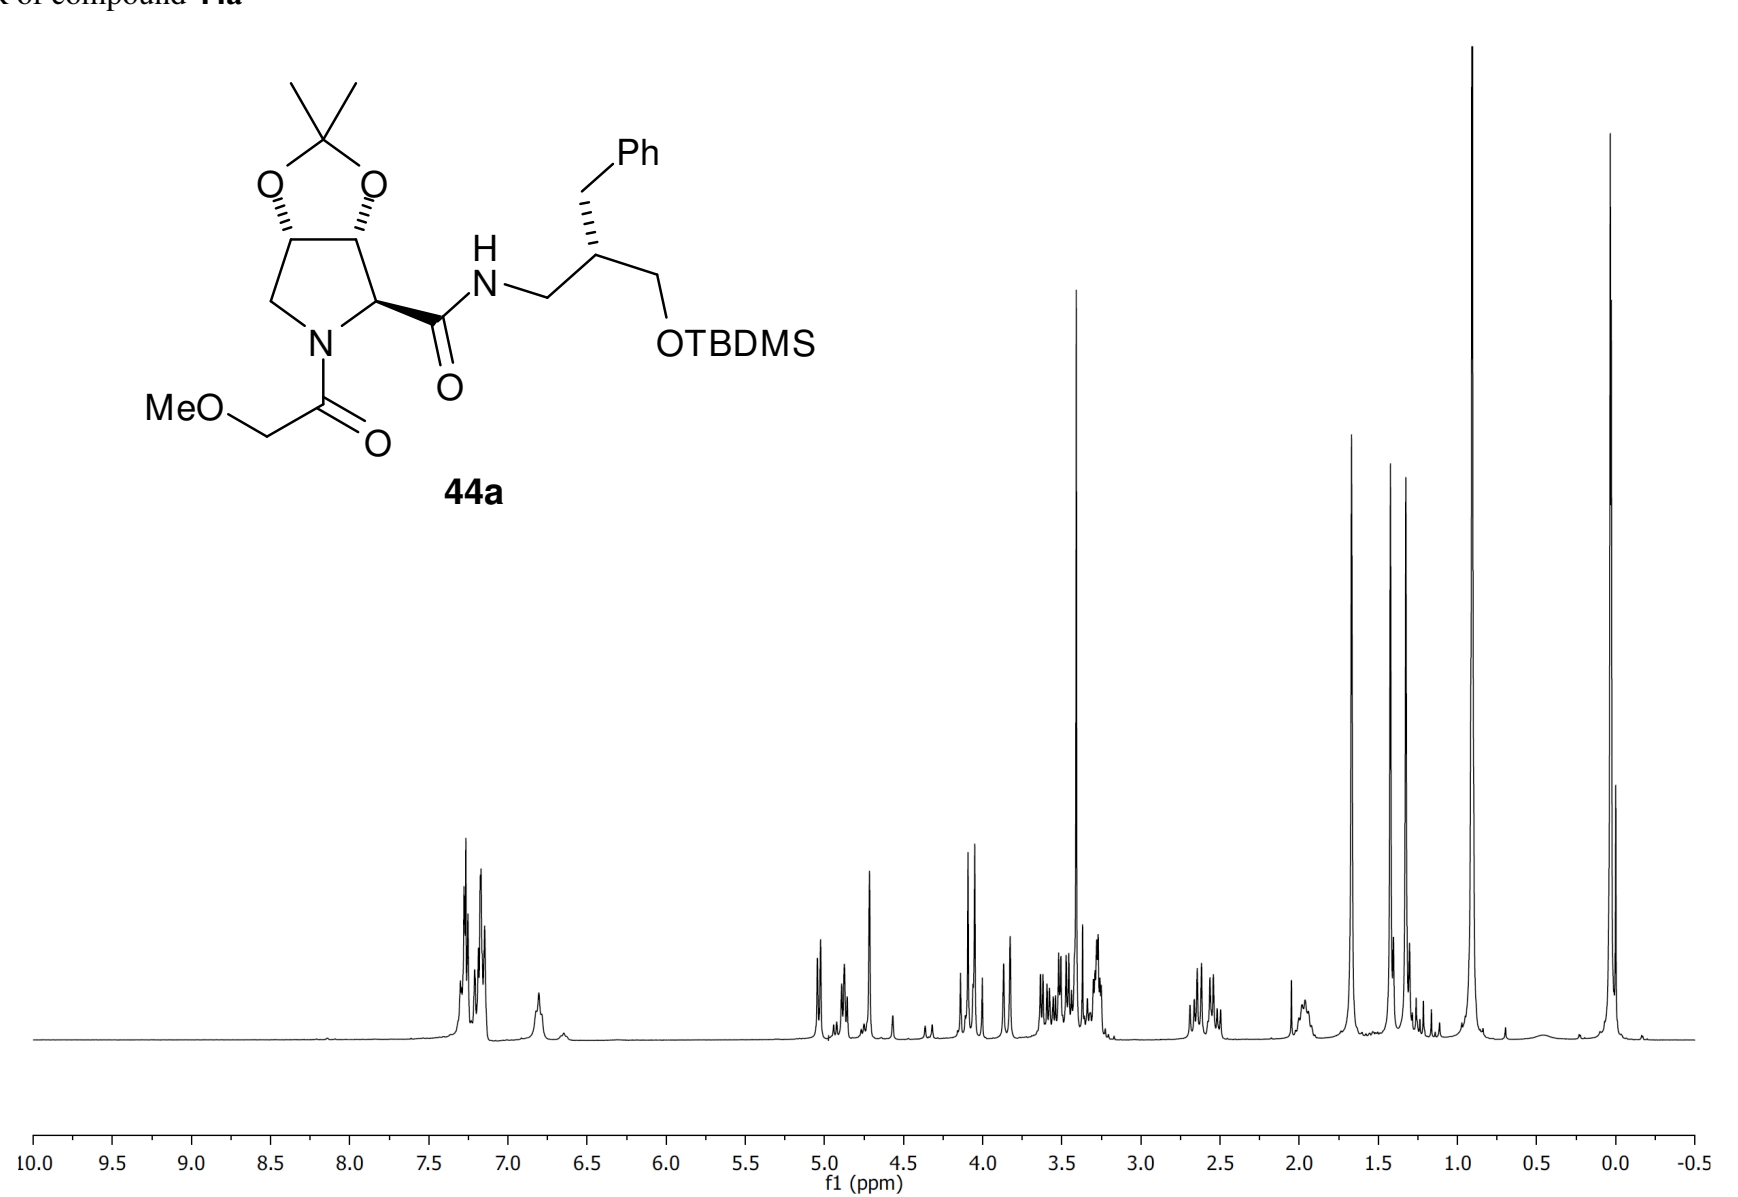

$^{13}\text{C}$  NMR of compound **44a**

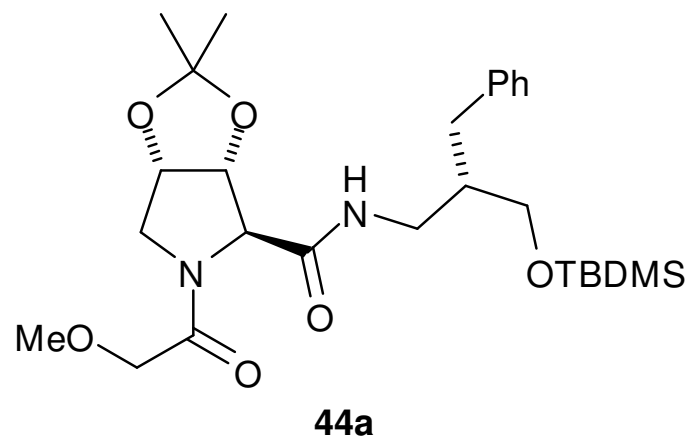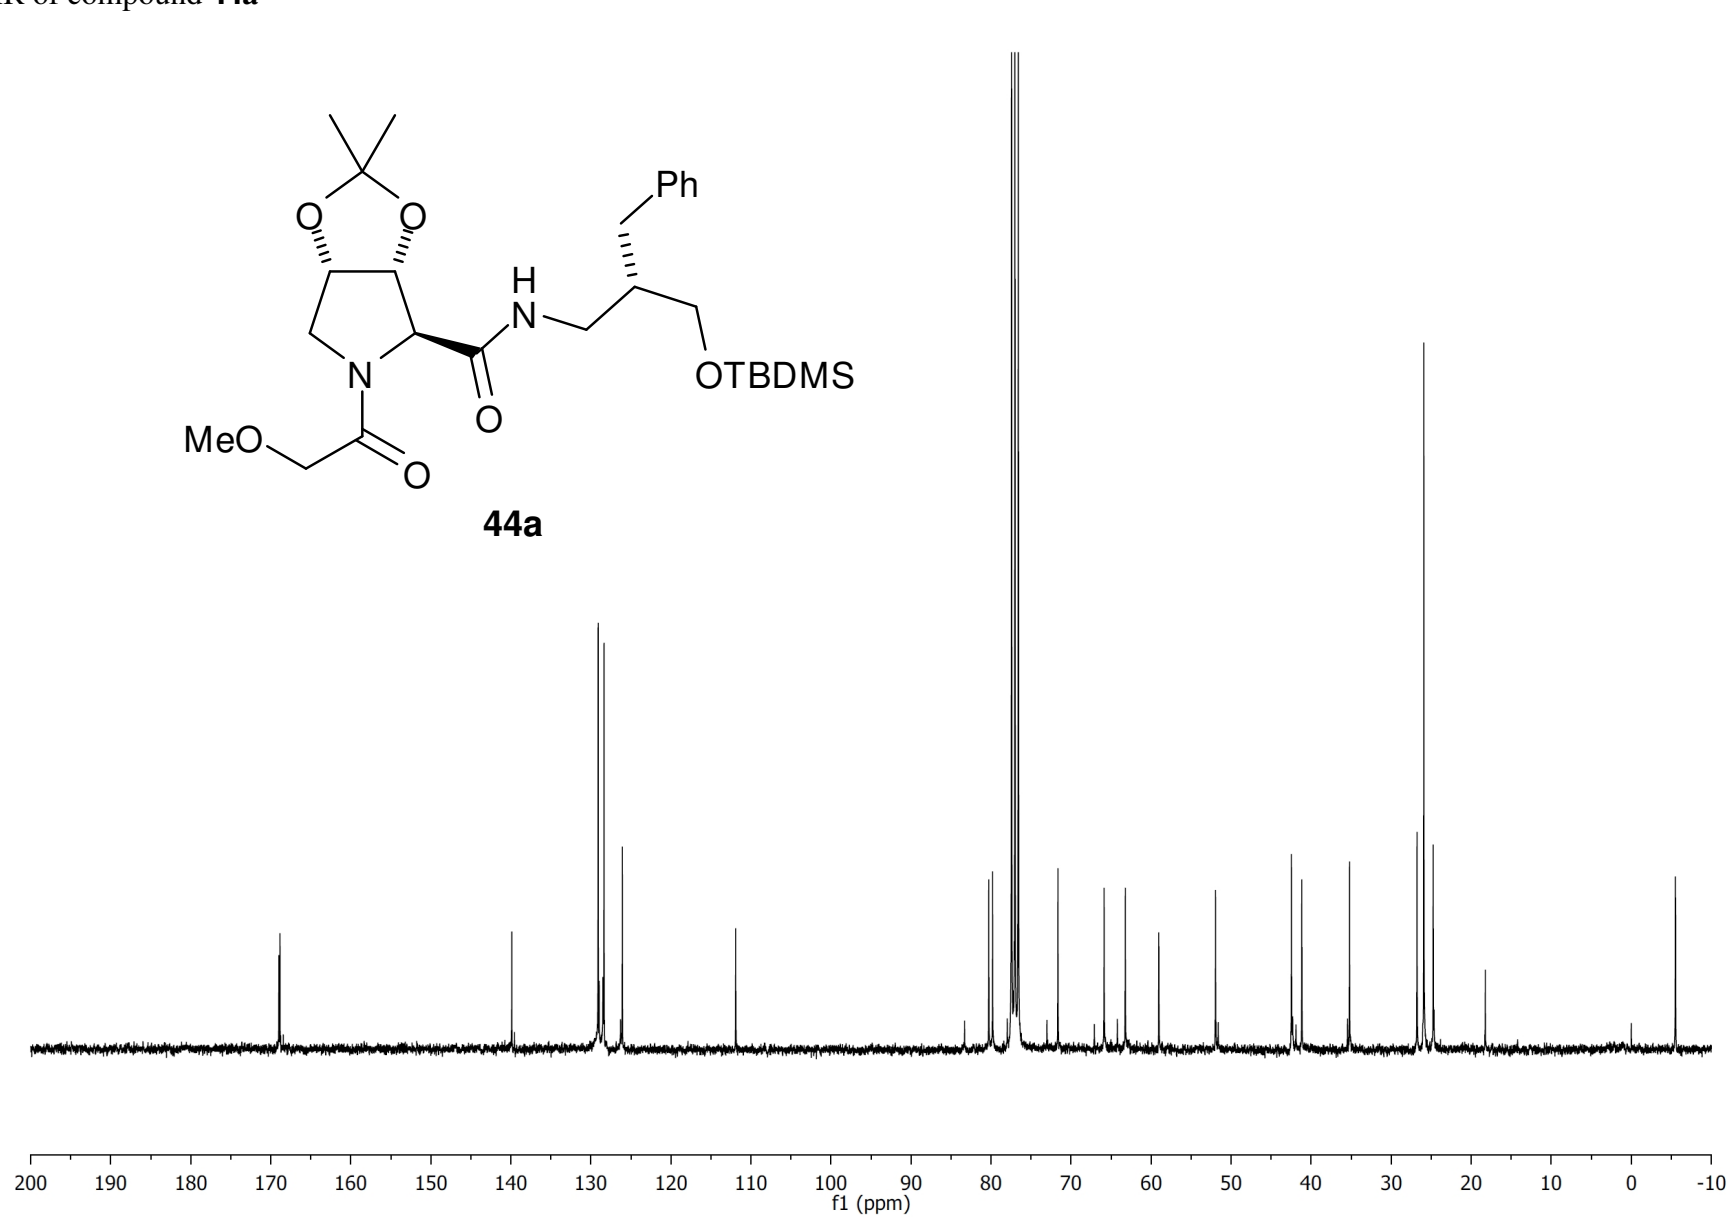

<sup>1</sup>H NMR of compound **44b**

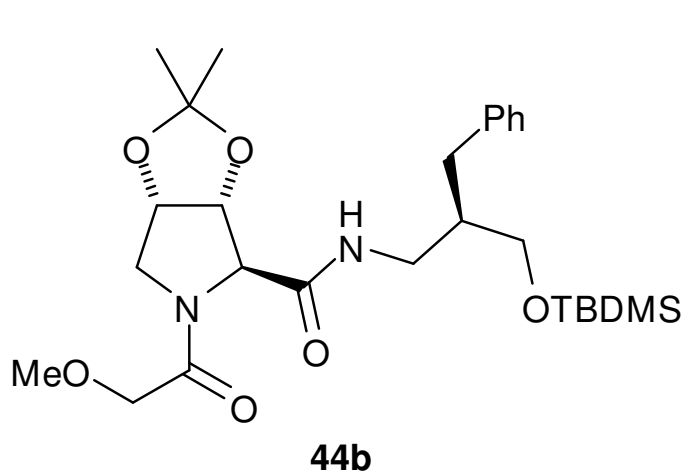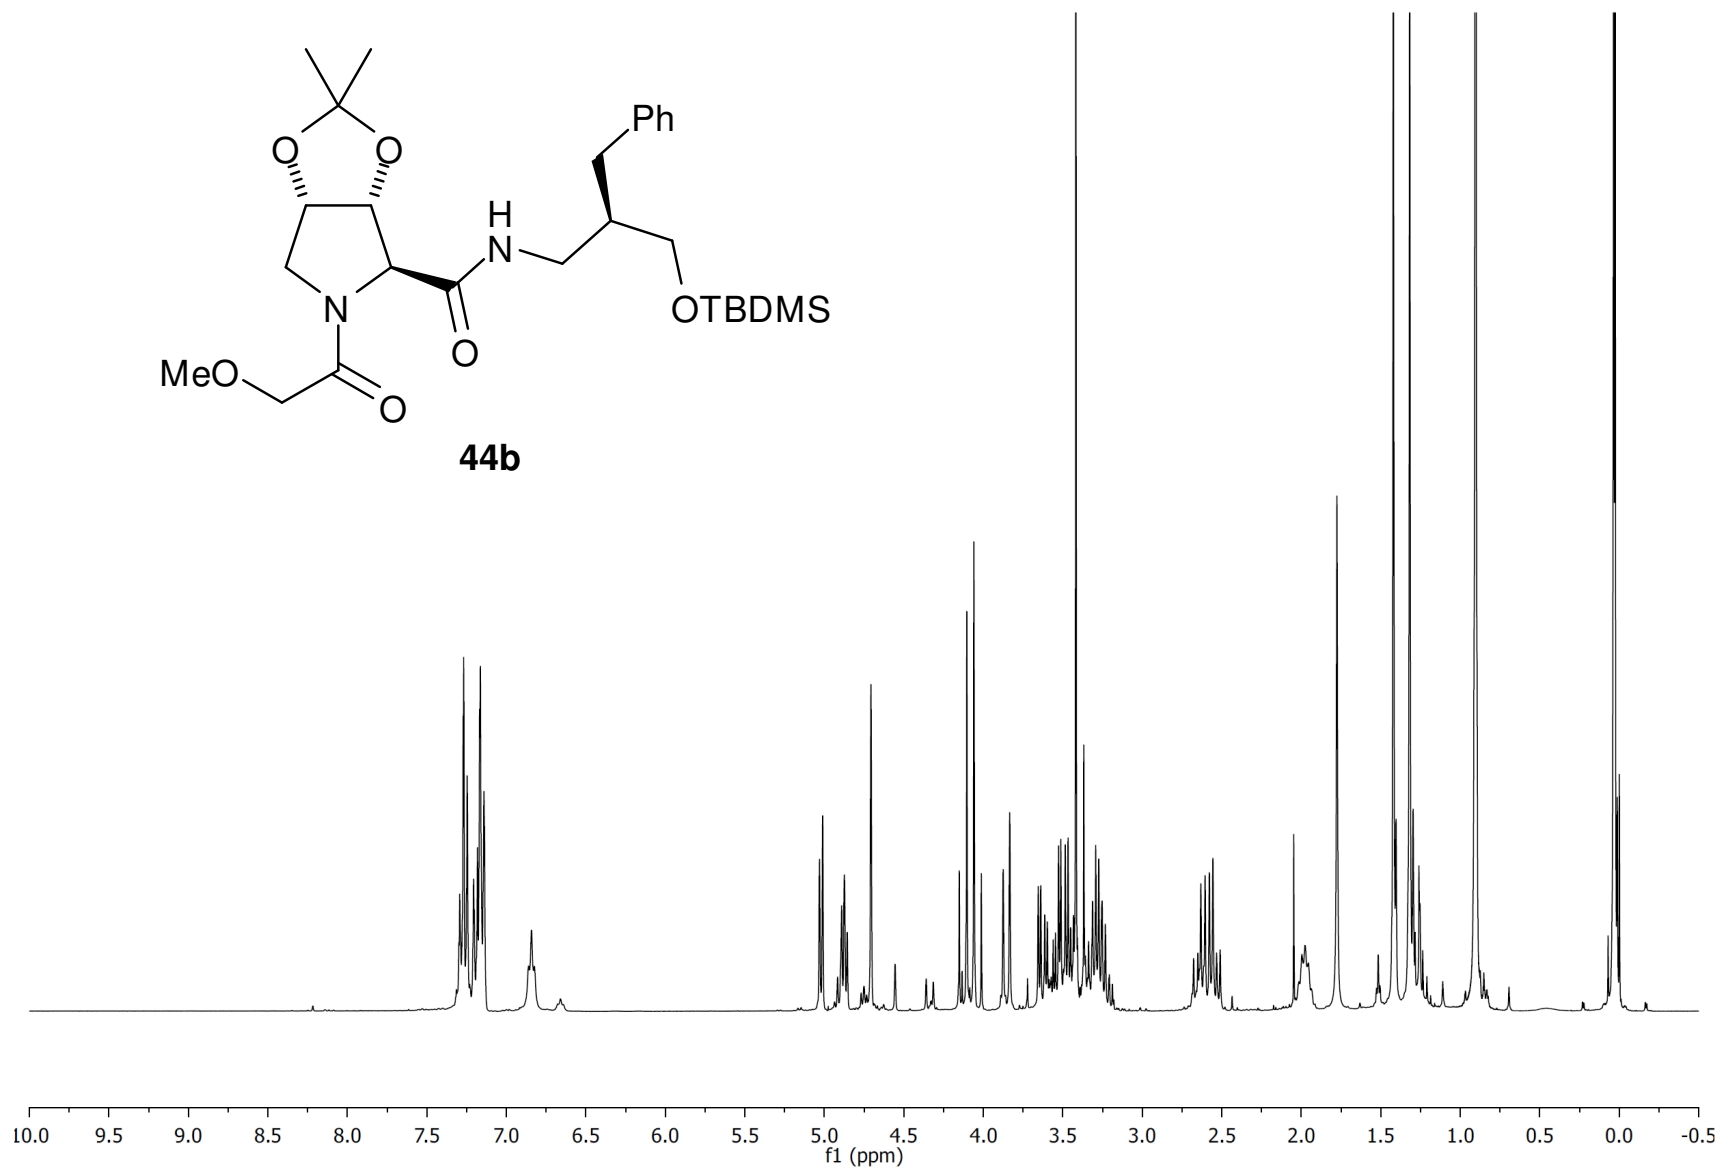

$^{13}\text{C}$  NMR of compound **44b**

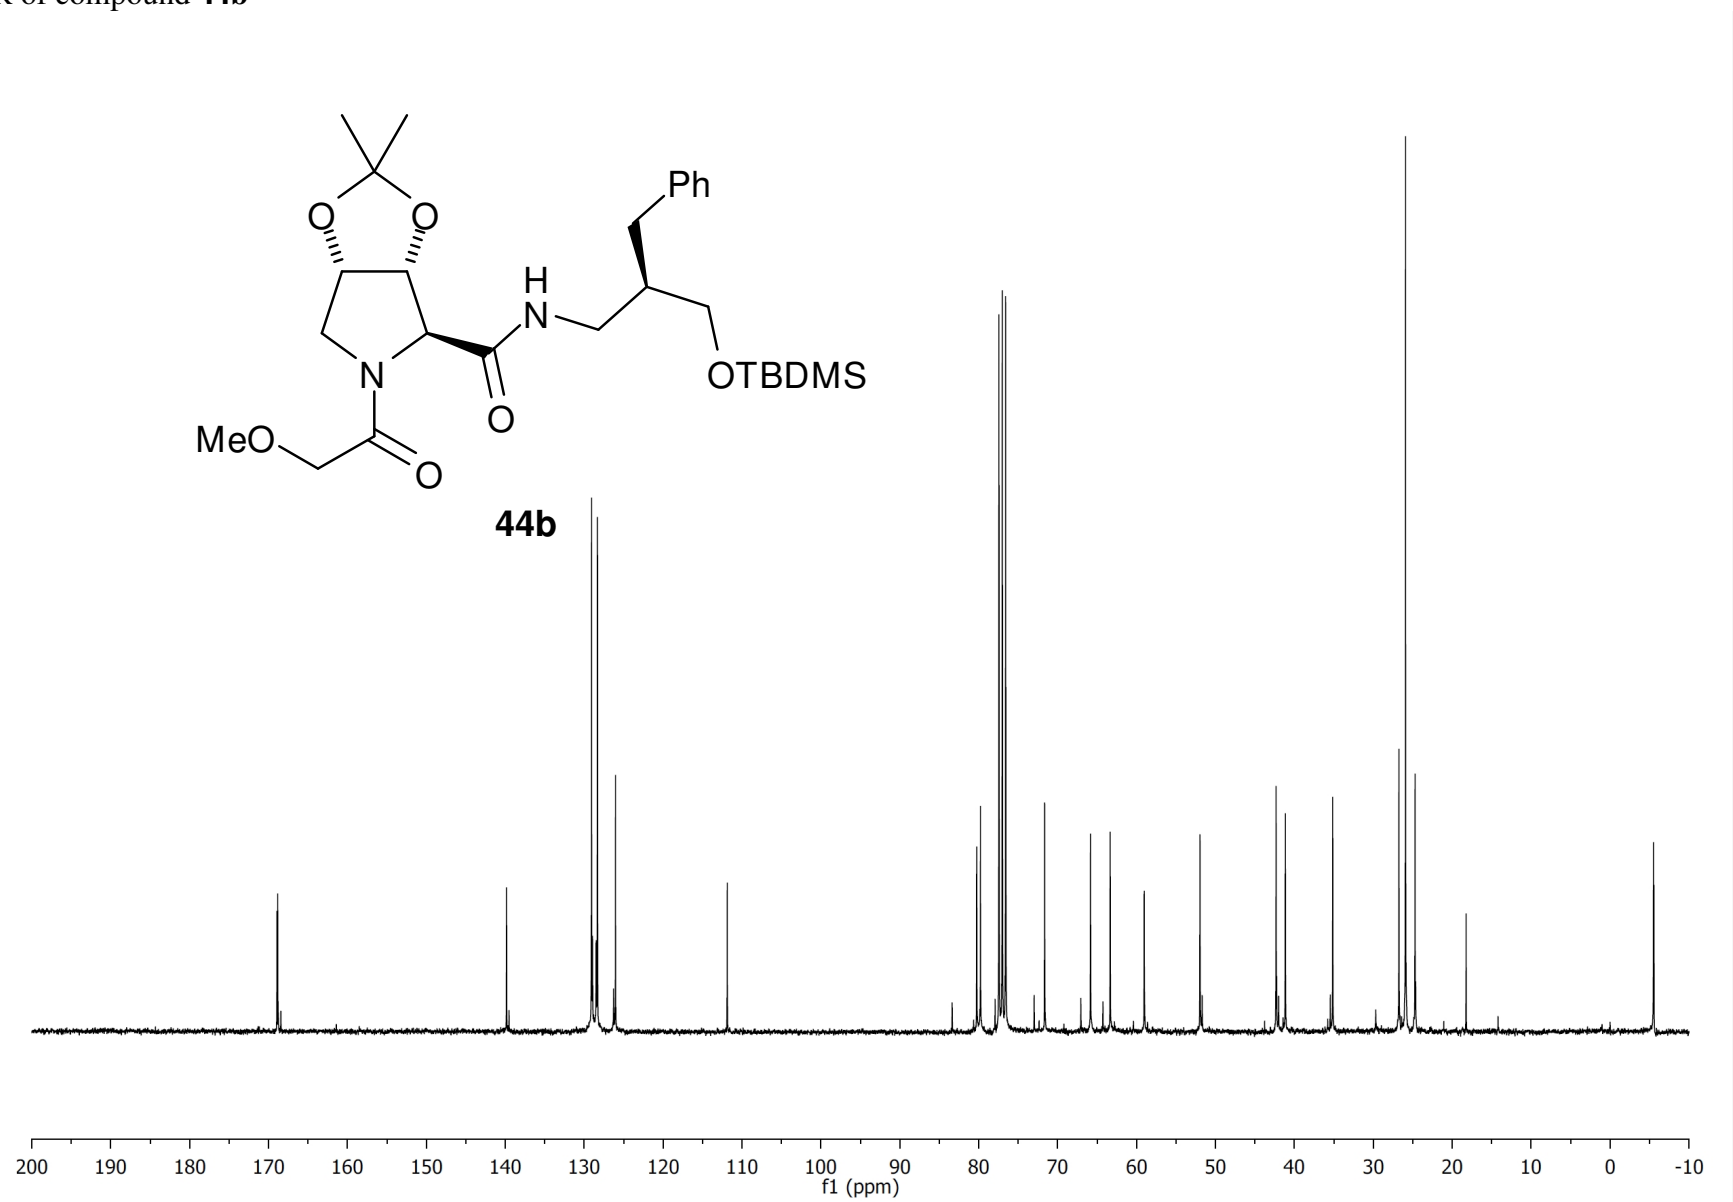

<sup>1</sup>H NMR of compound **45c**

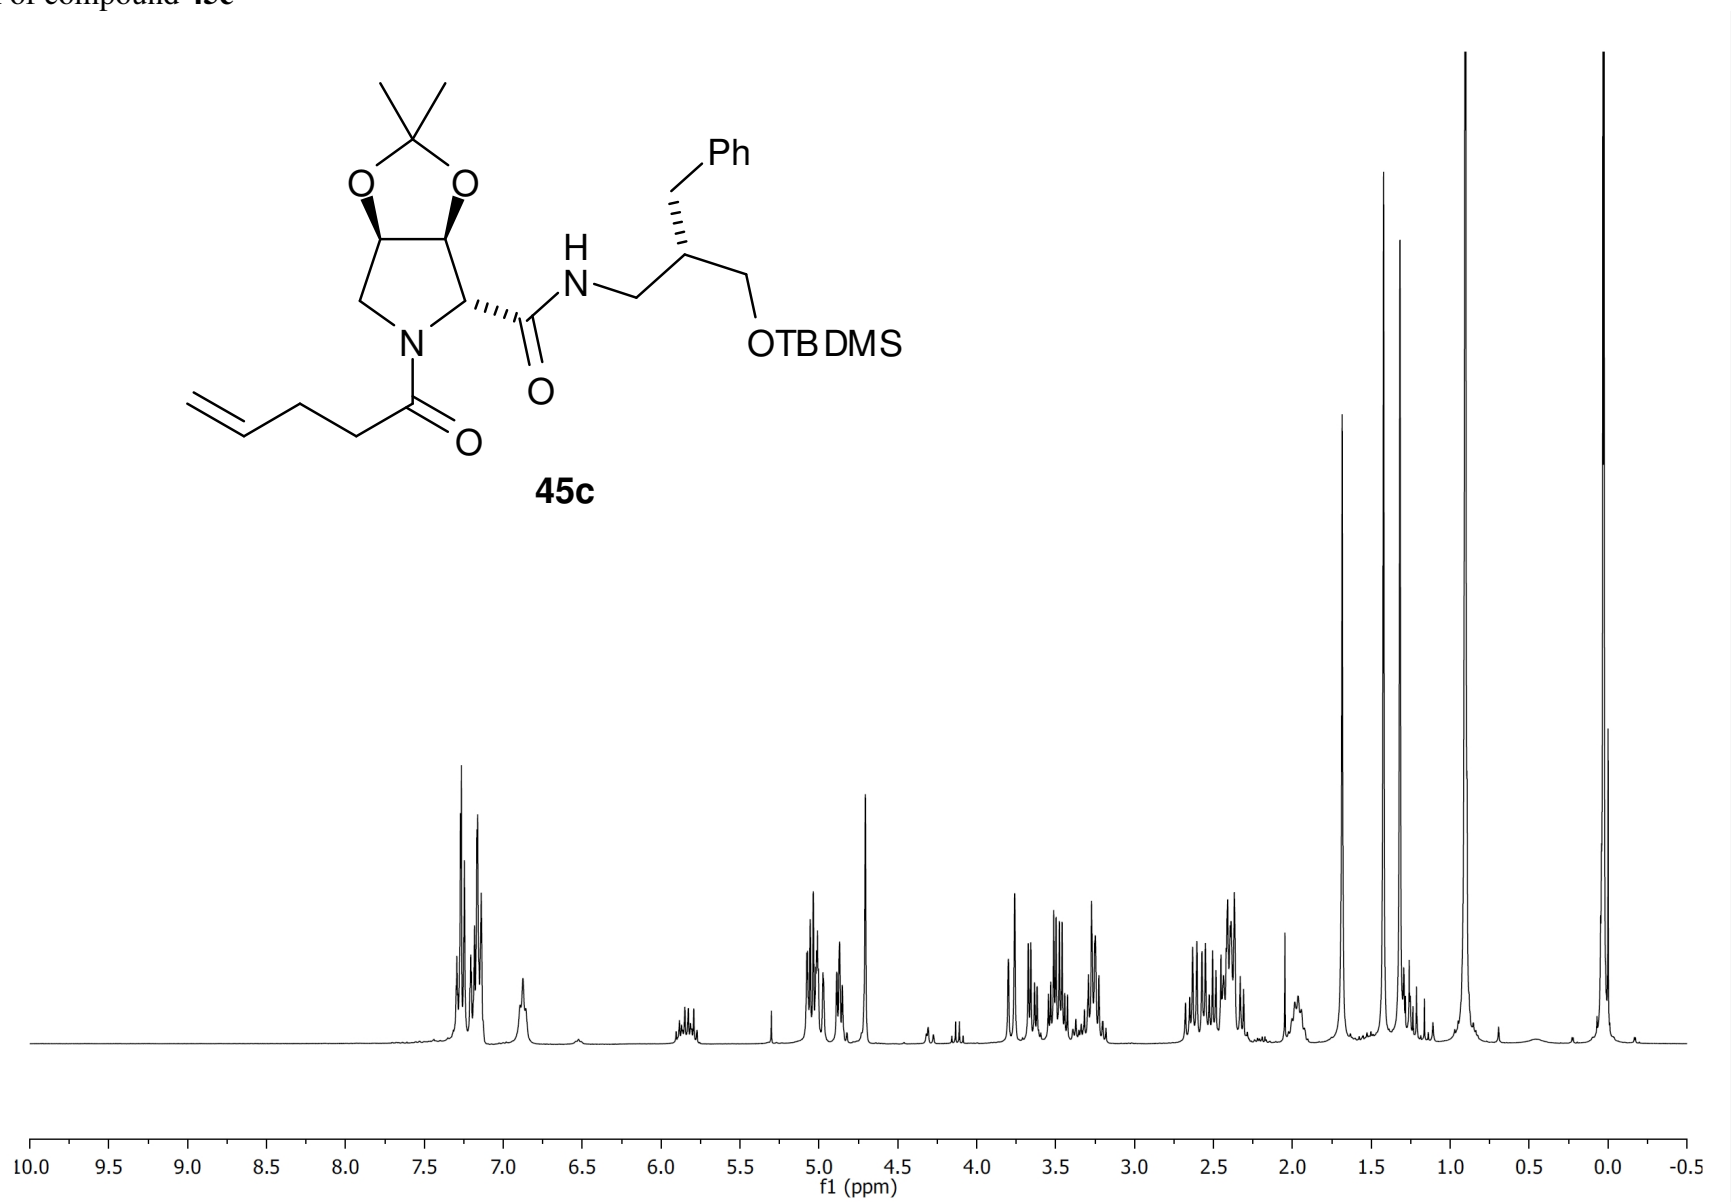



$^{13}\text{C}$  NMR of compound **45c**

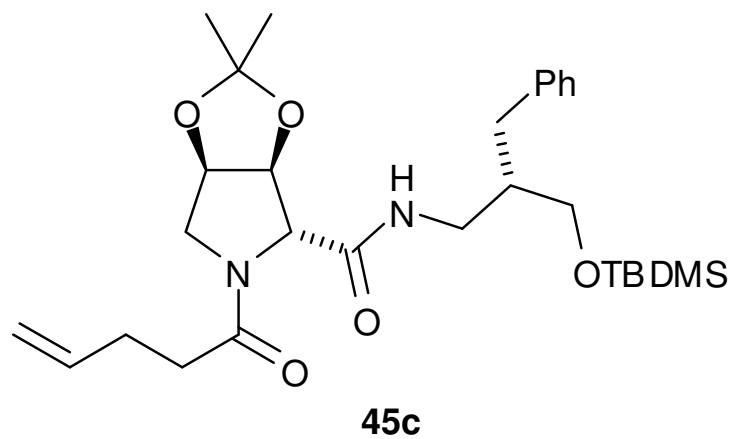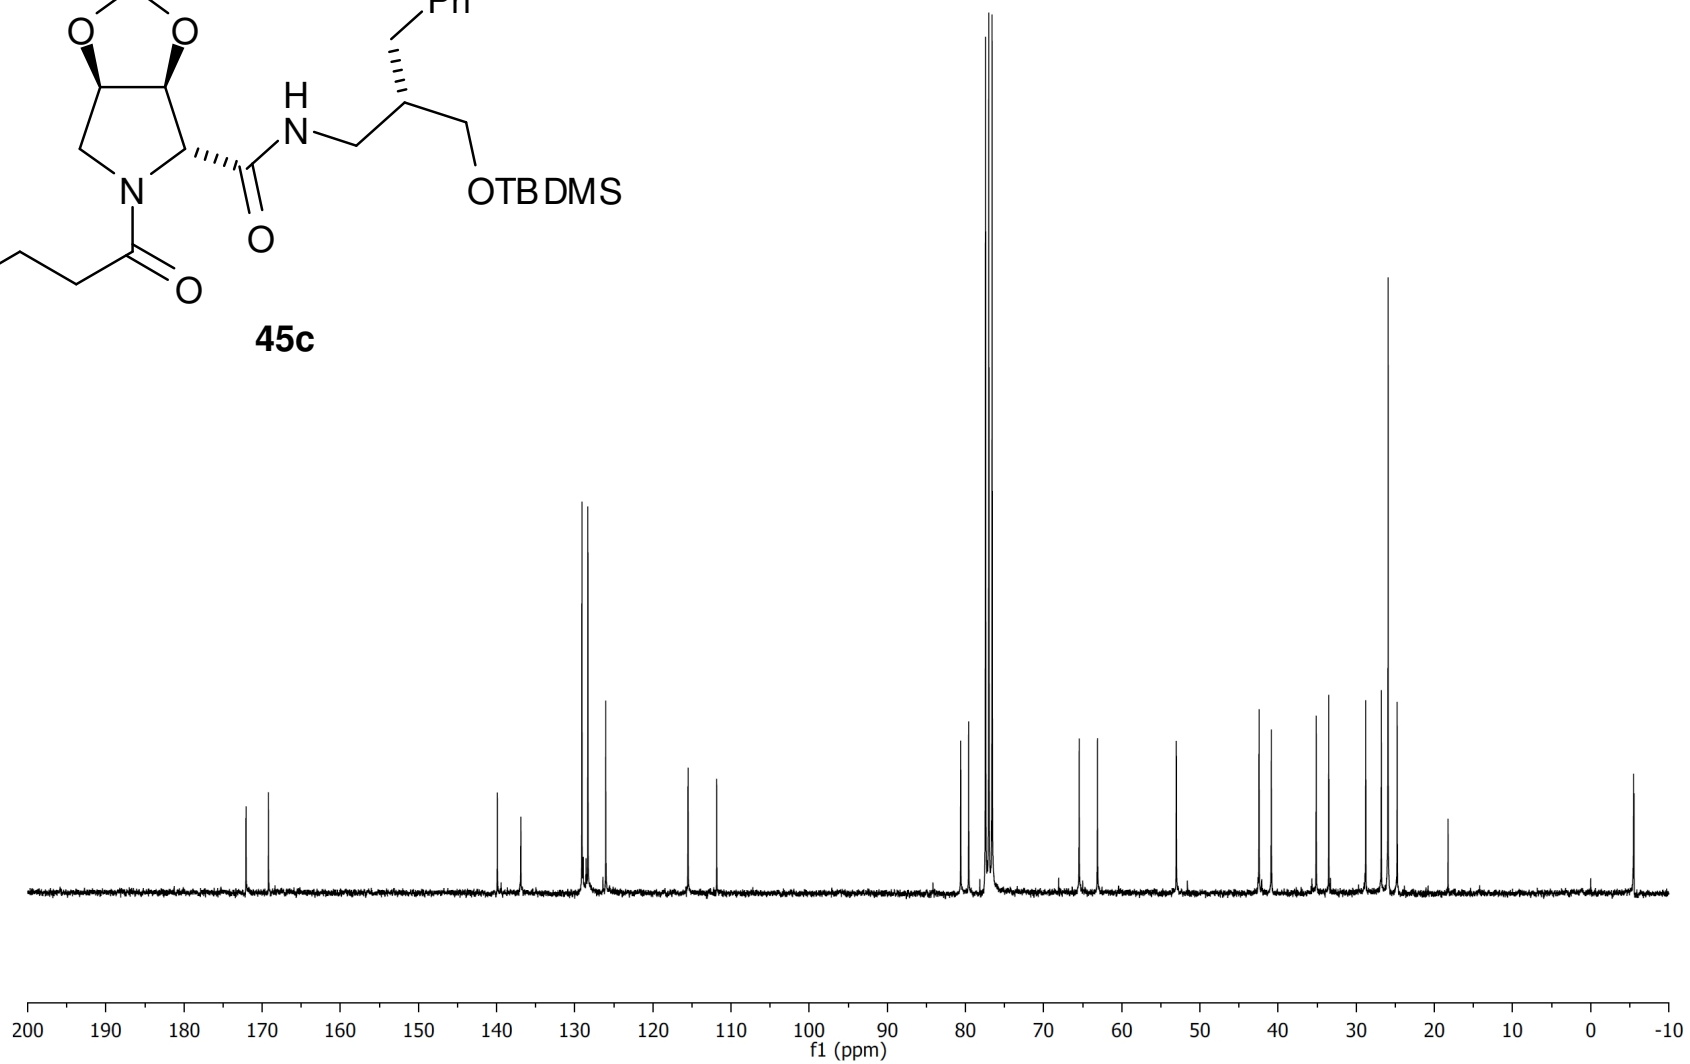

<sup>1</sup>H NMR of compound **46c**

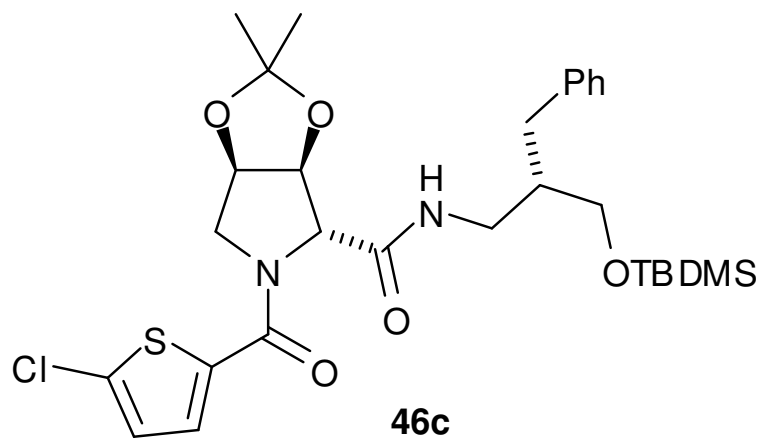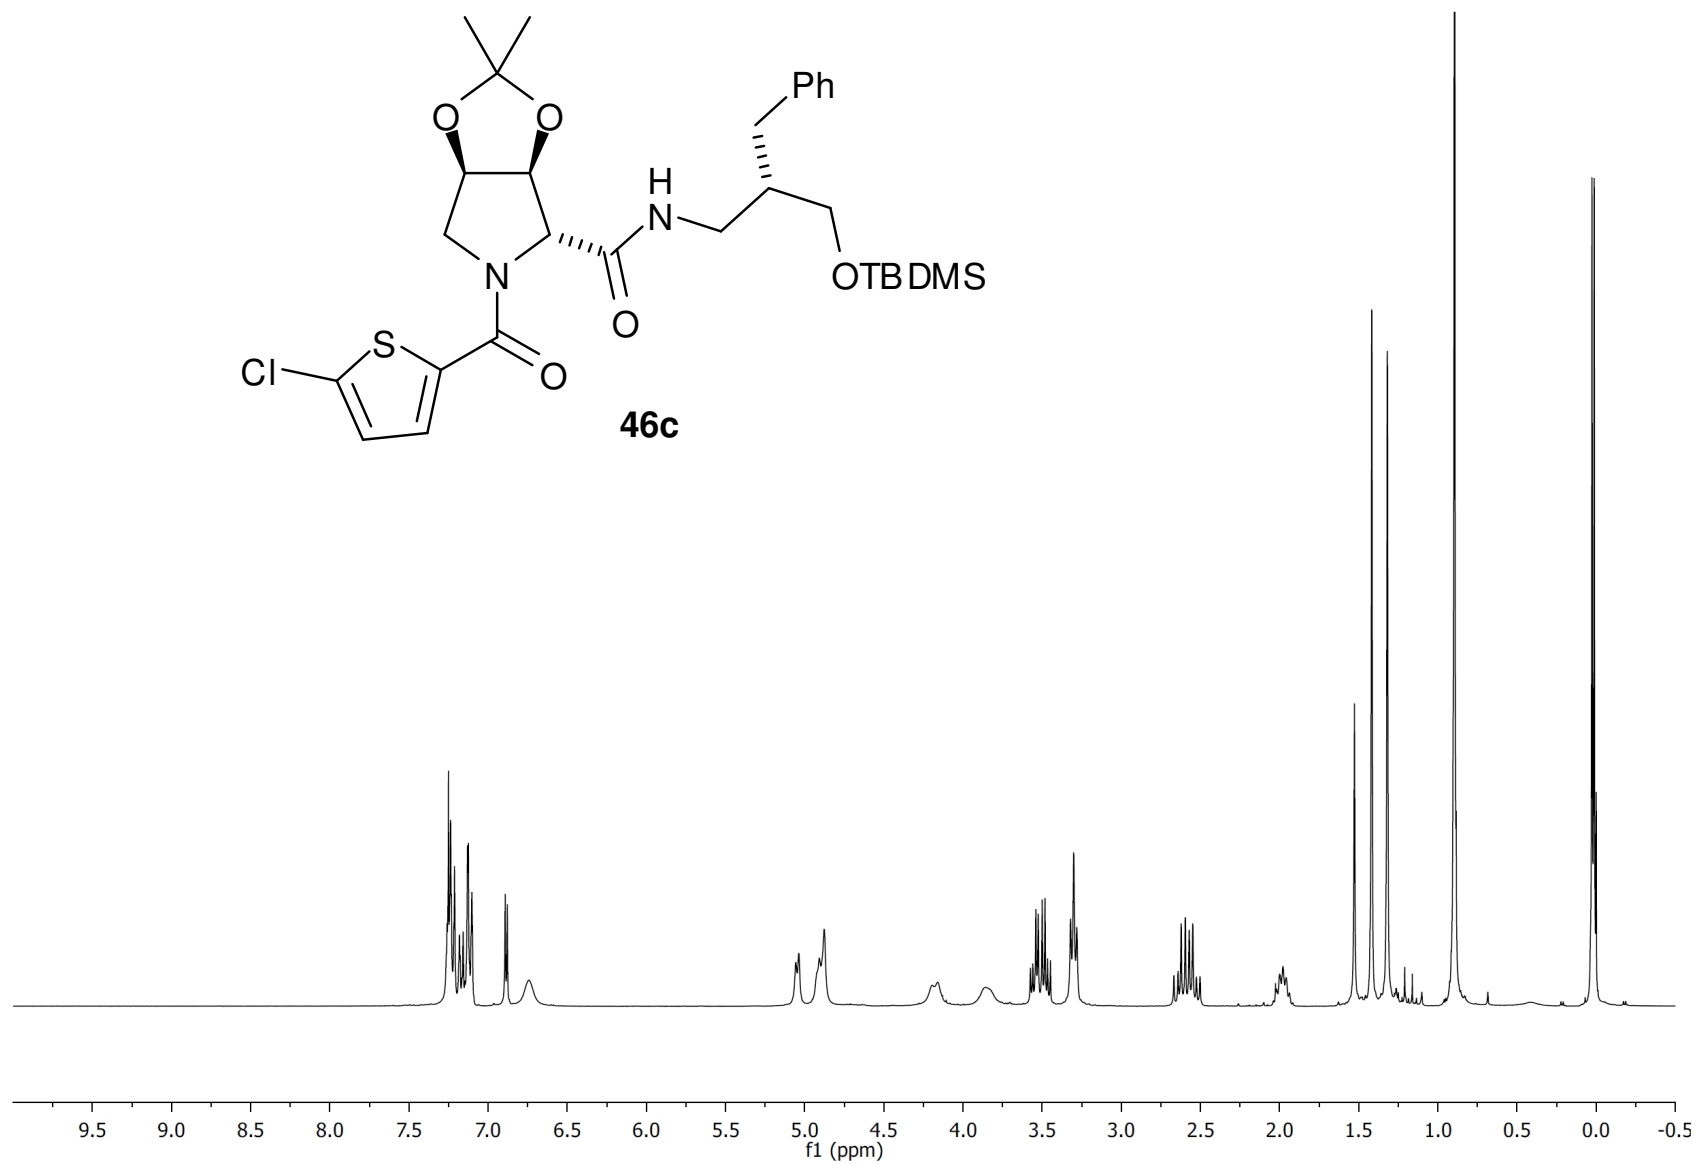

$^{13}\text{C}$  NMR of compound **46c**

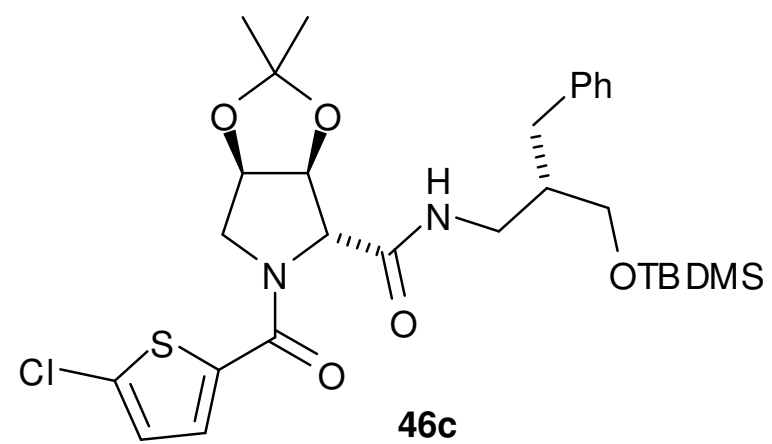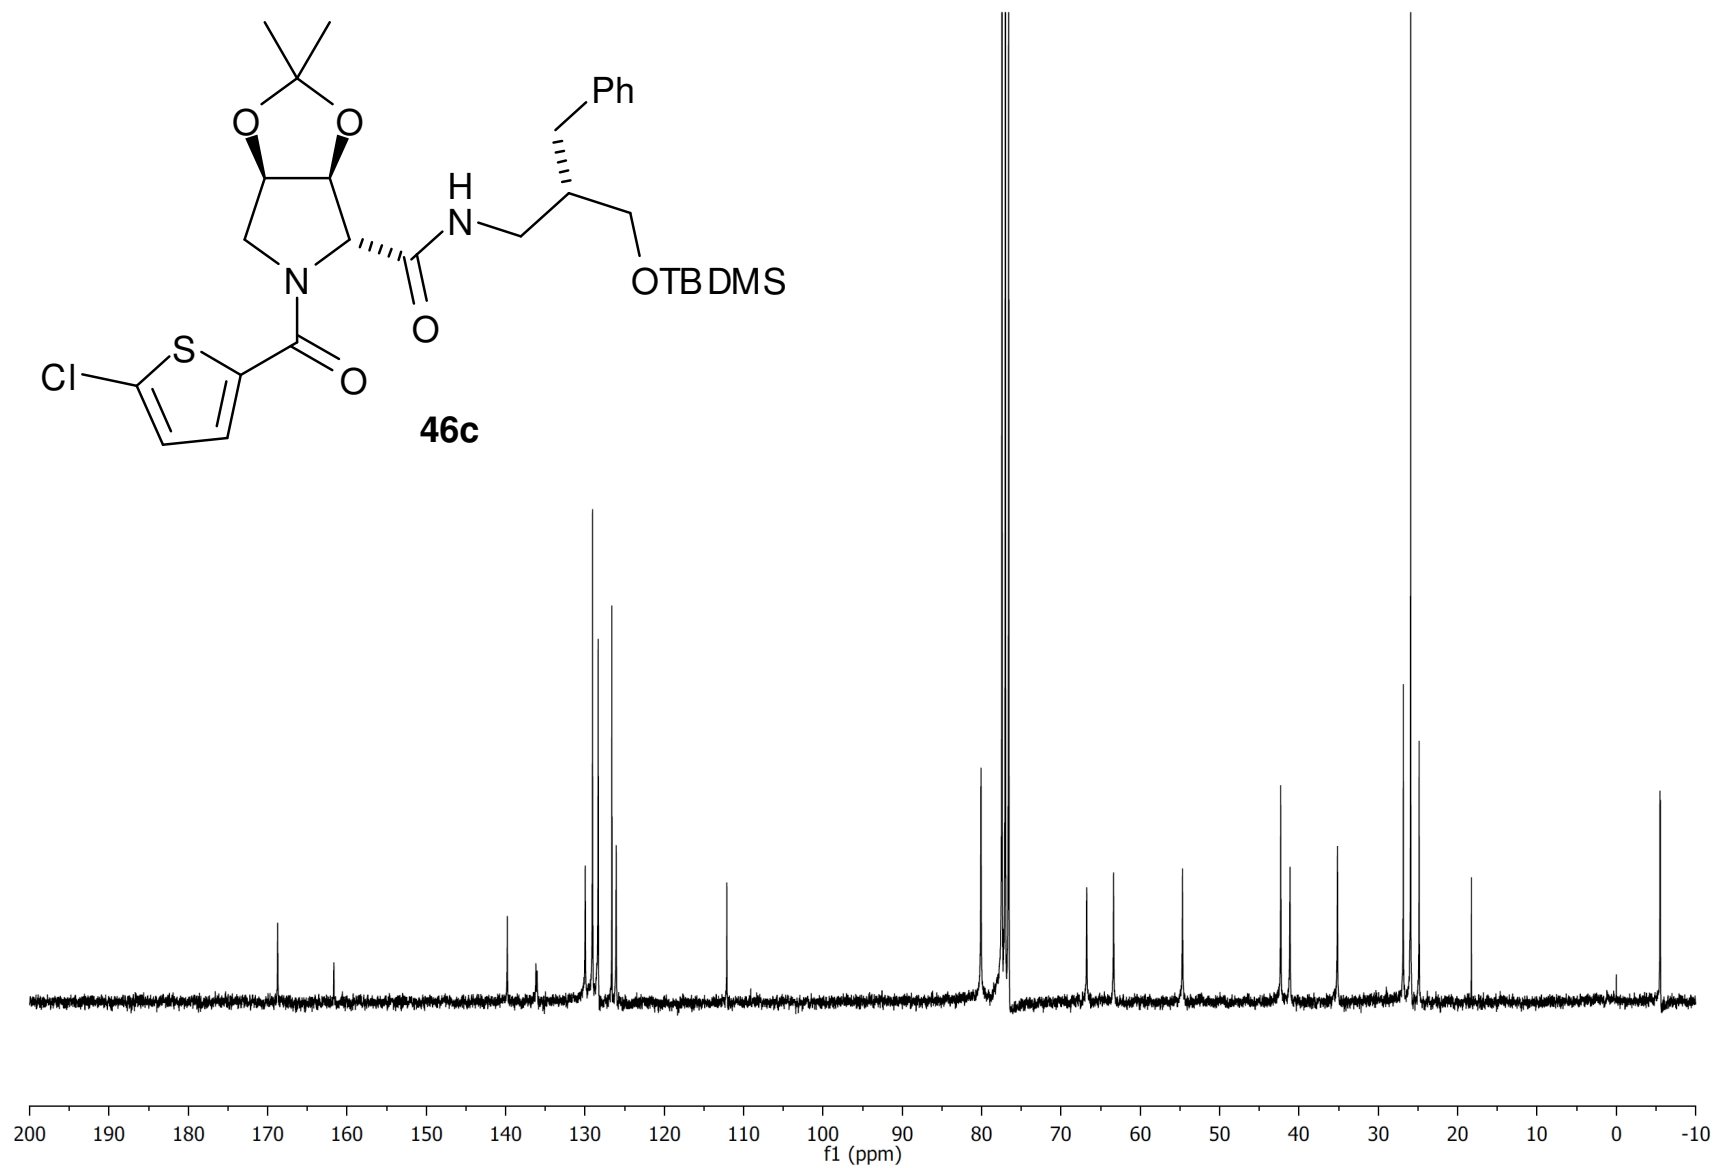

<sup>1</sup>H NMR of compound **47a**

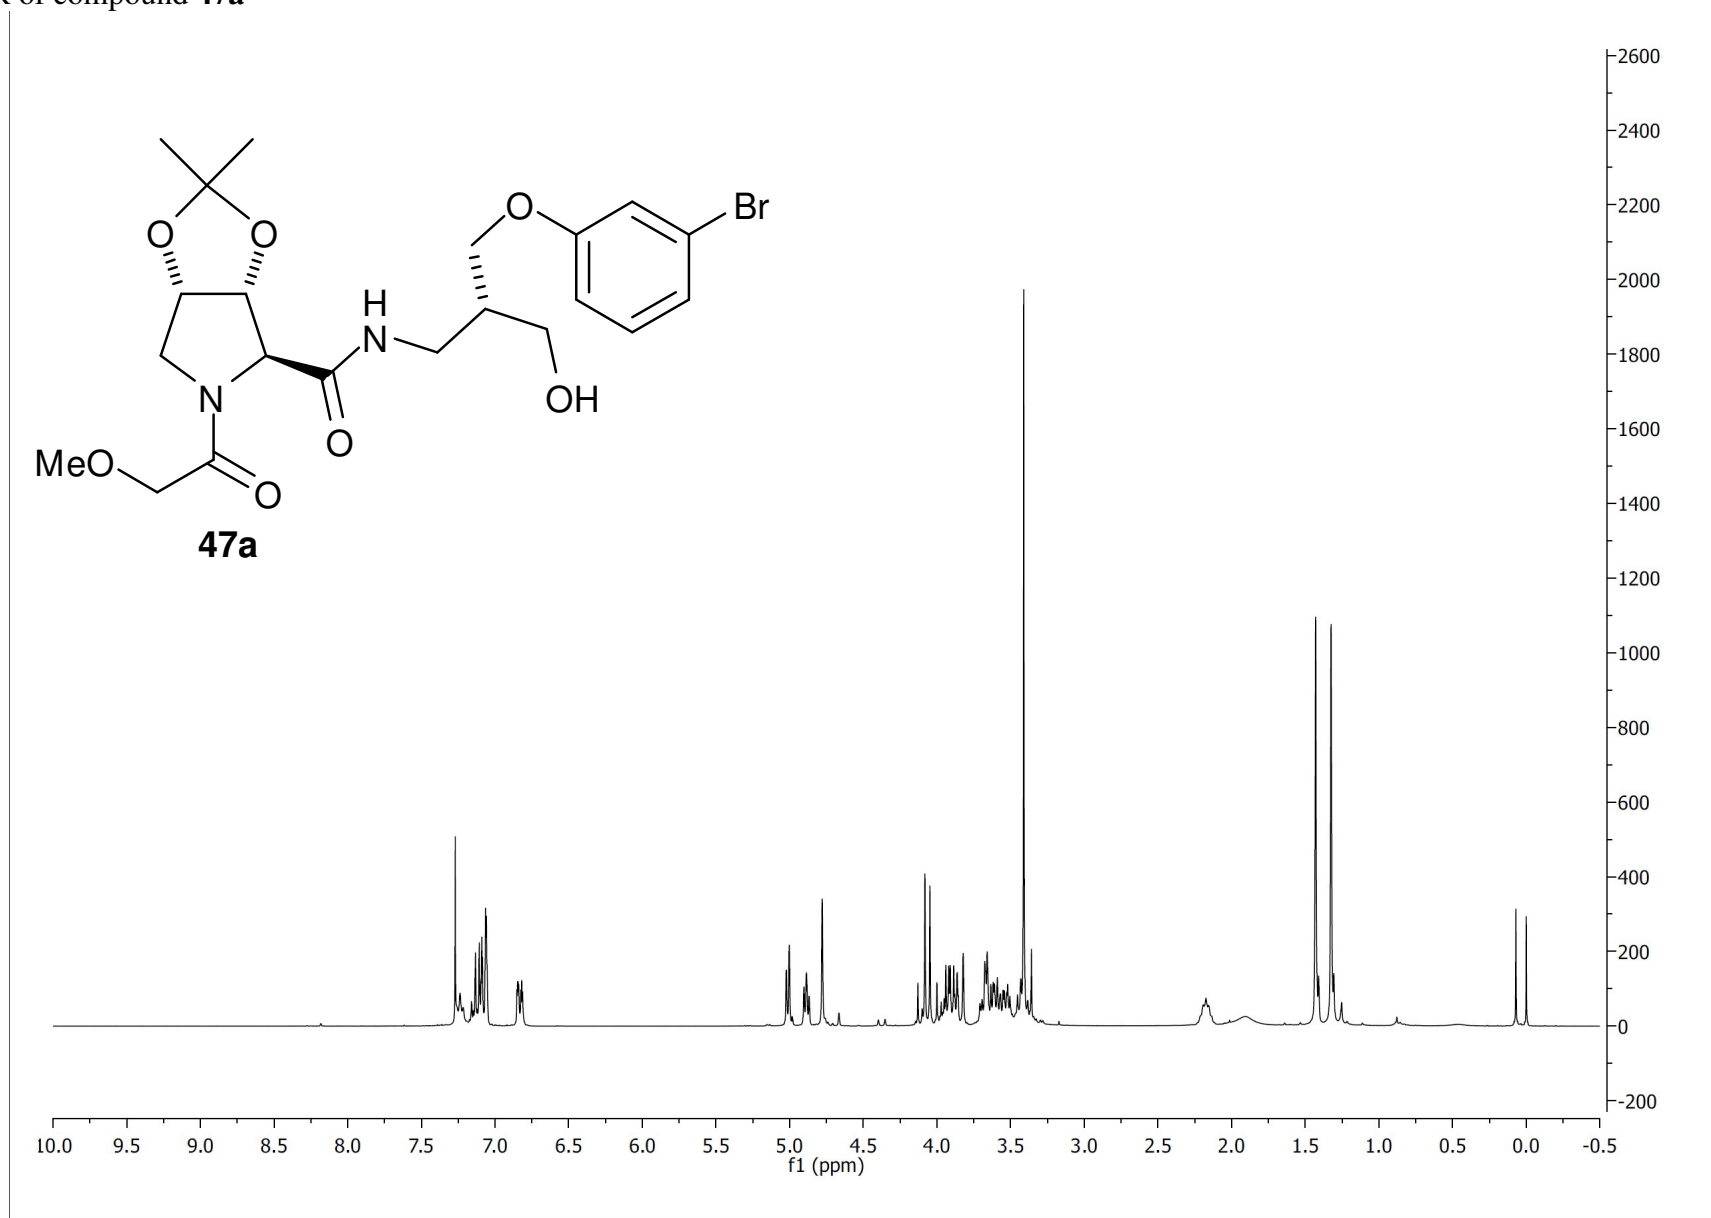

$^{13}\text{C}$  NMR of compound **47a**

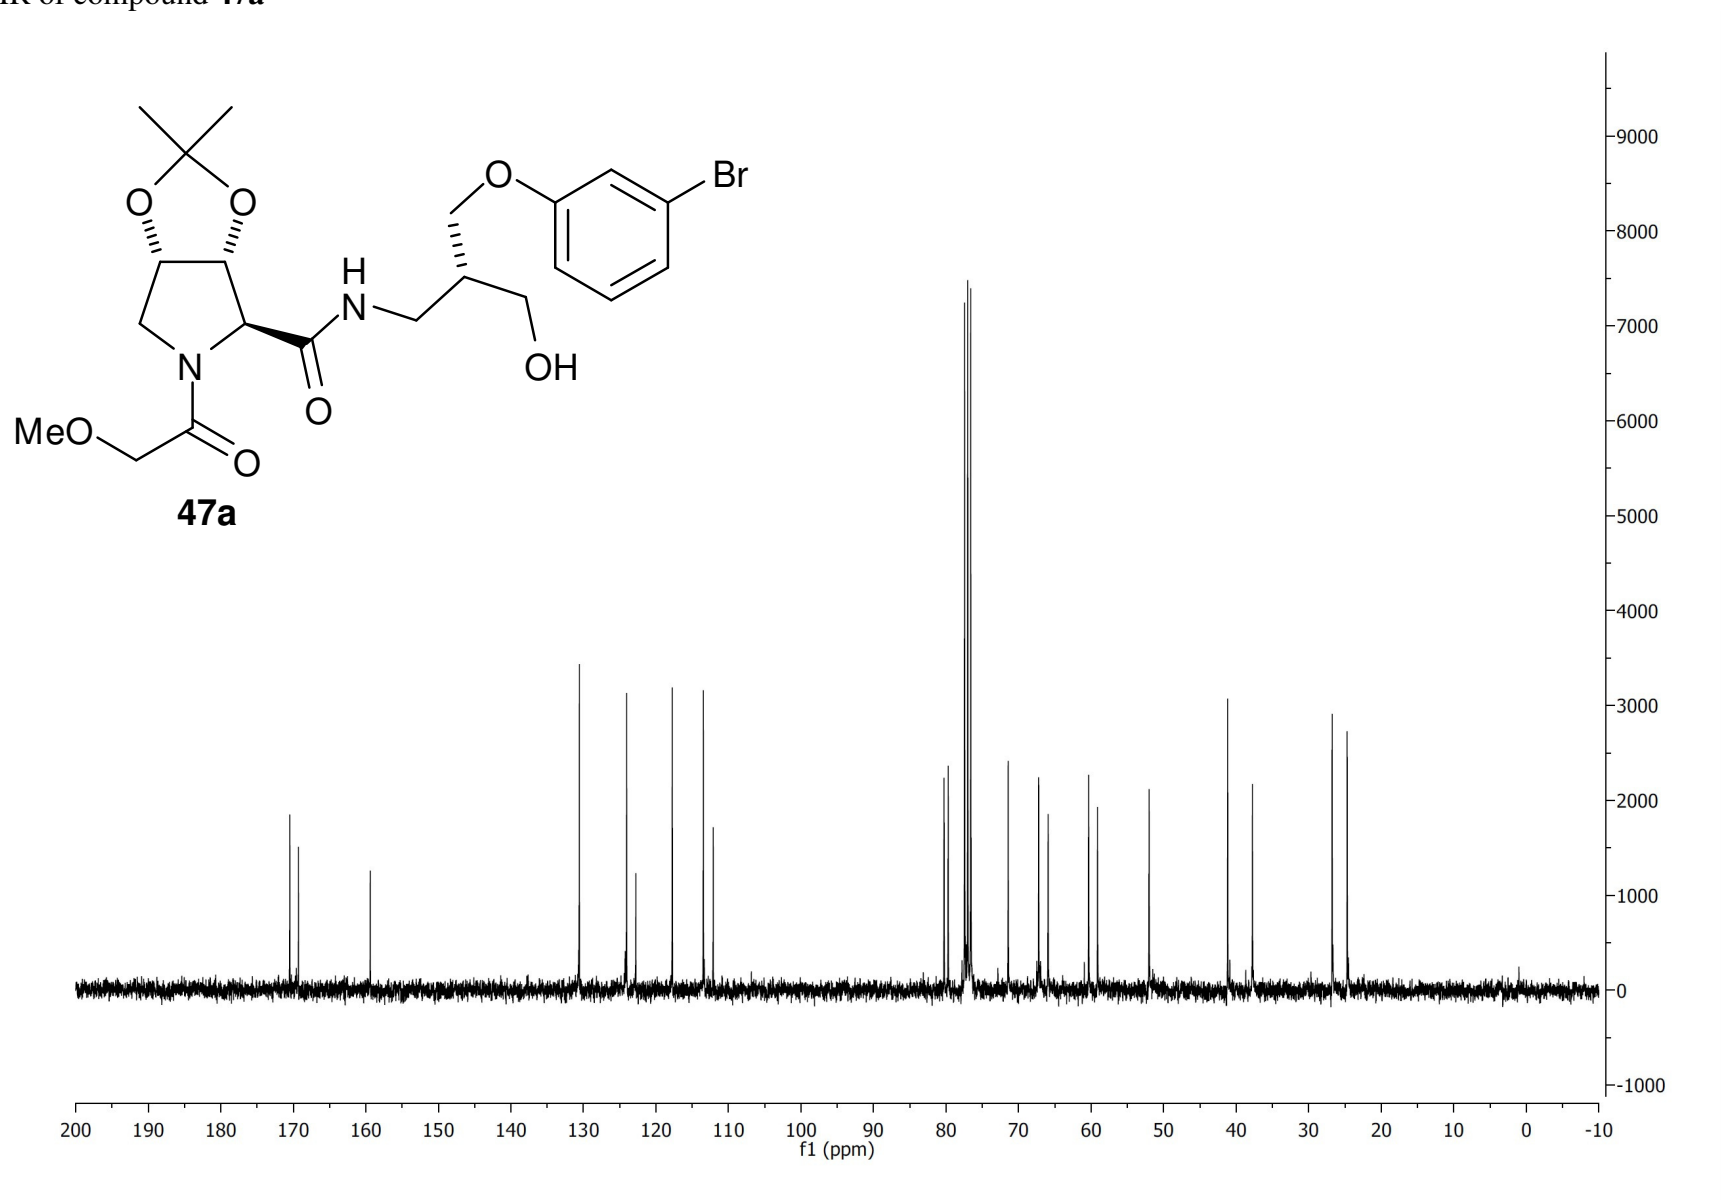

$^1\text{H}$  NMR of compound **48a**

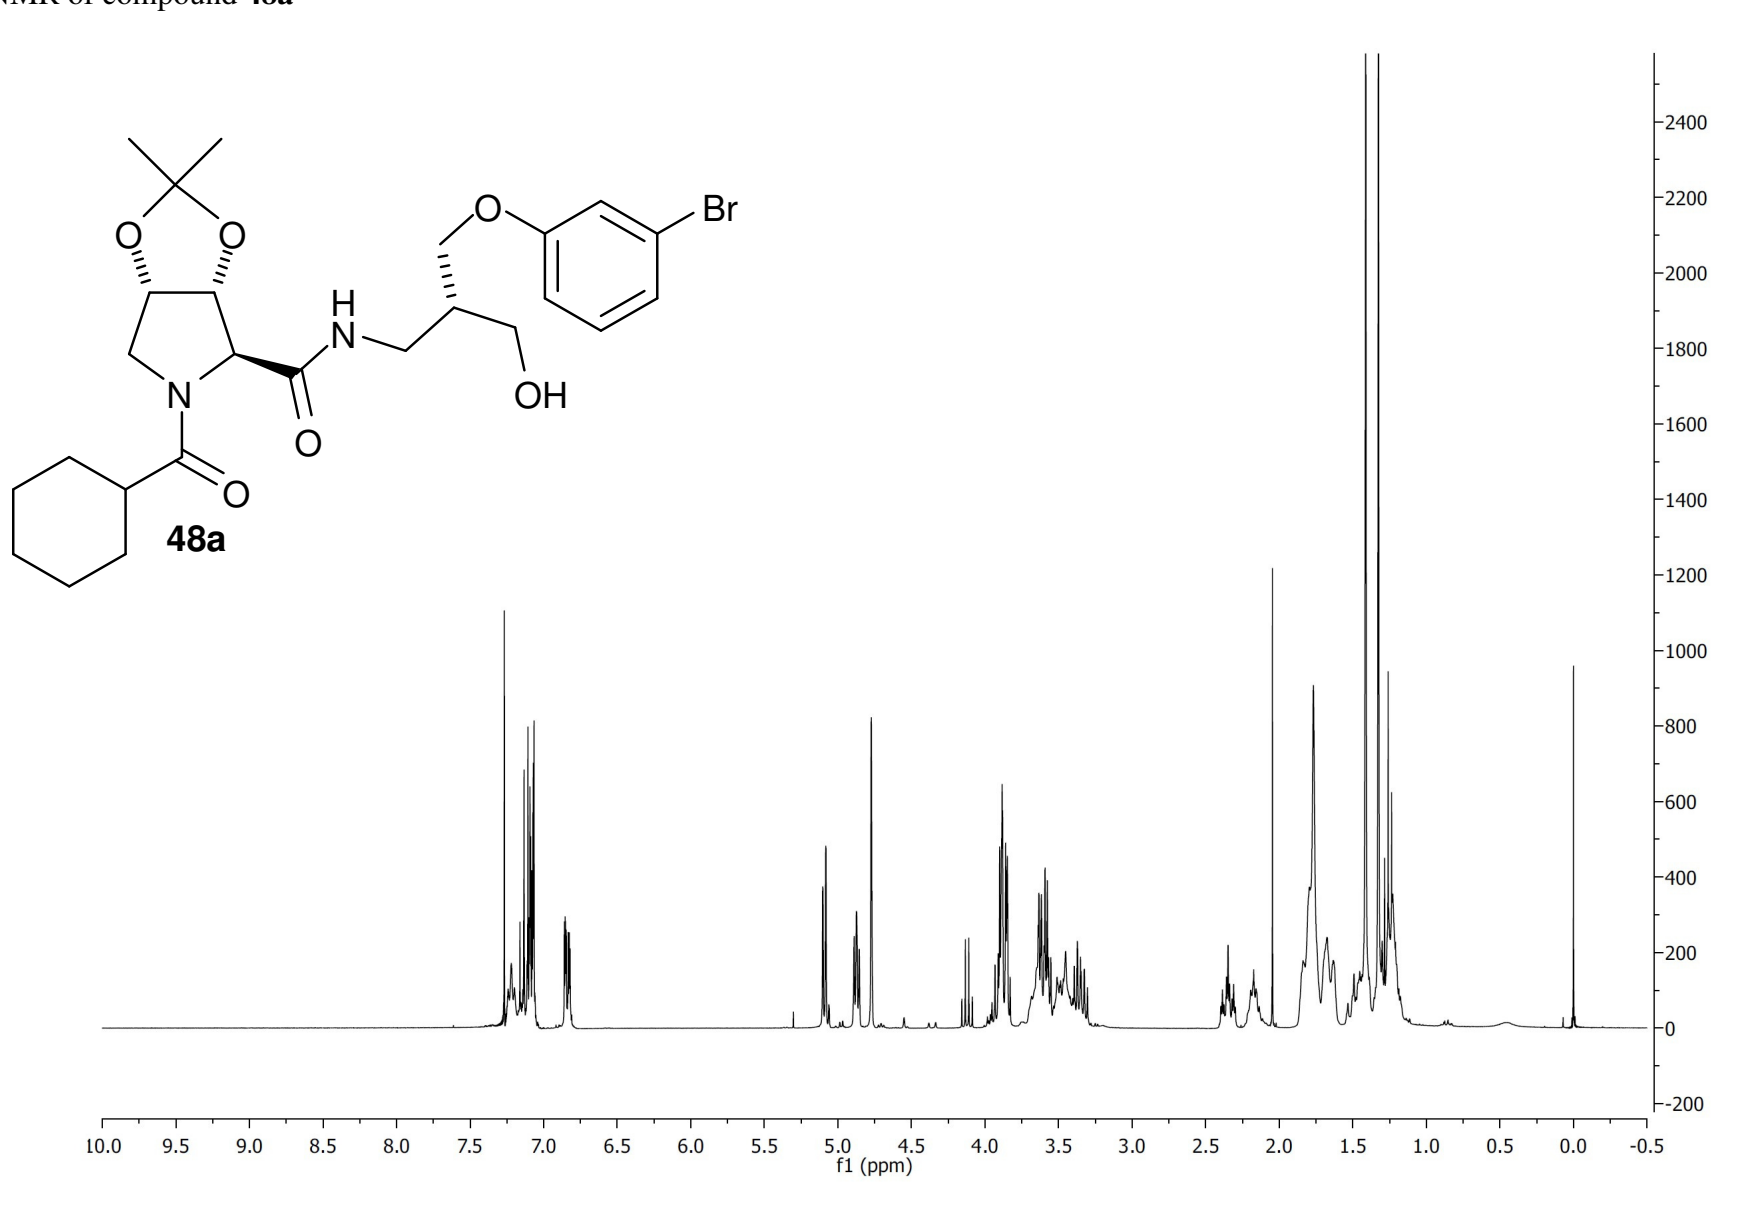

$^{13}\text{C}$  NMR of compound **48a**

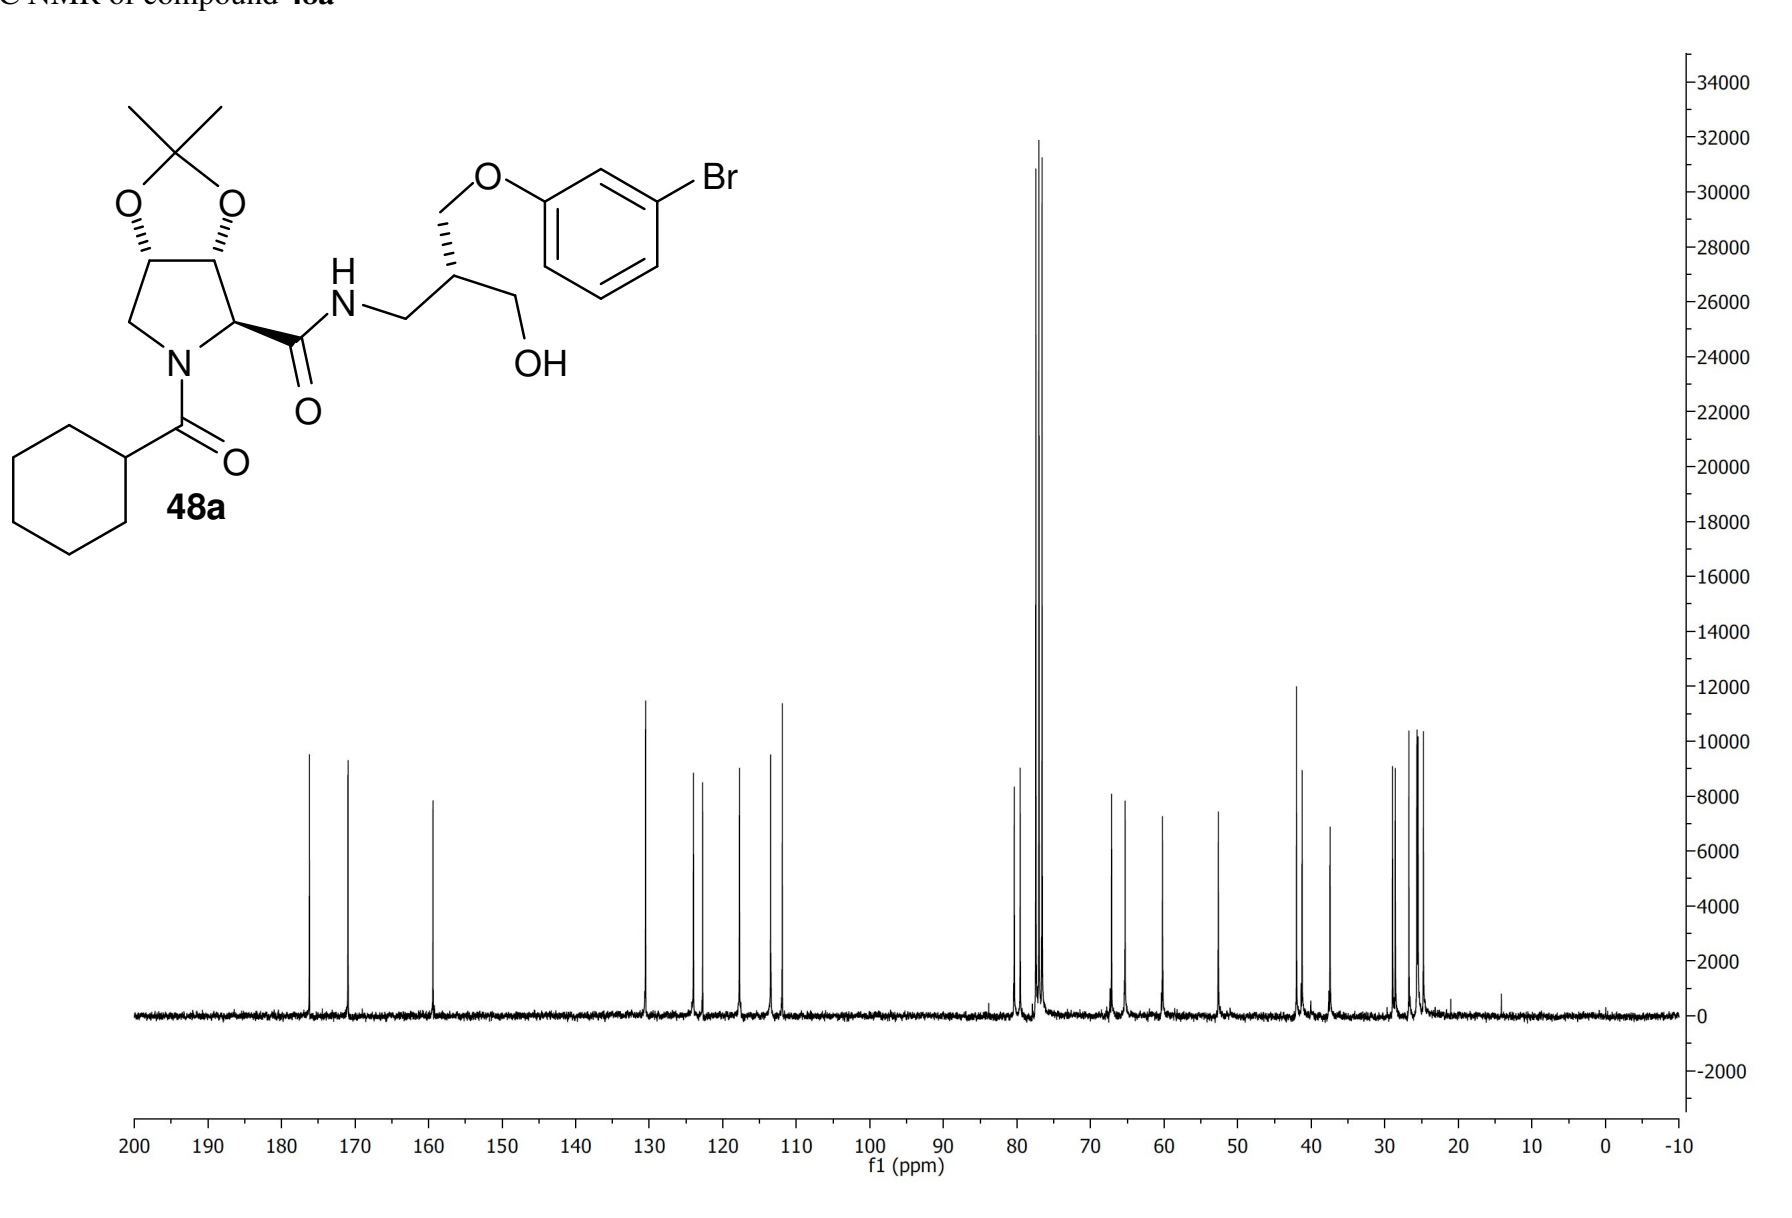

$^1\text{H}$  NMR of compound **48c**

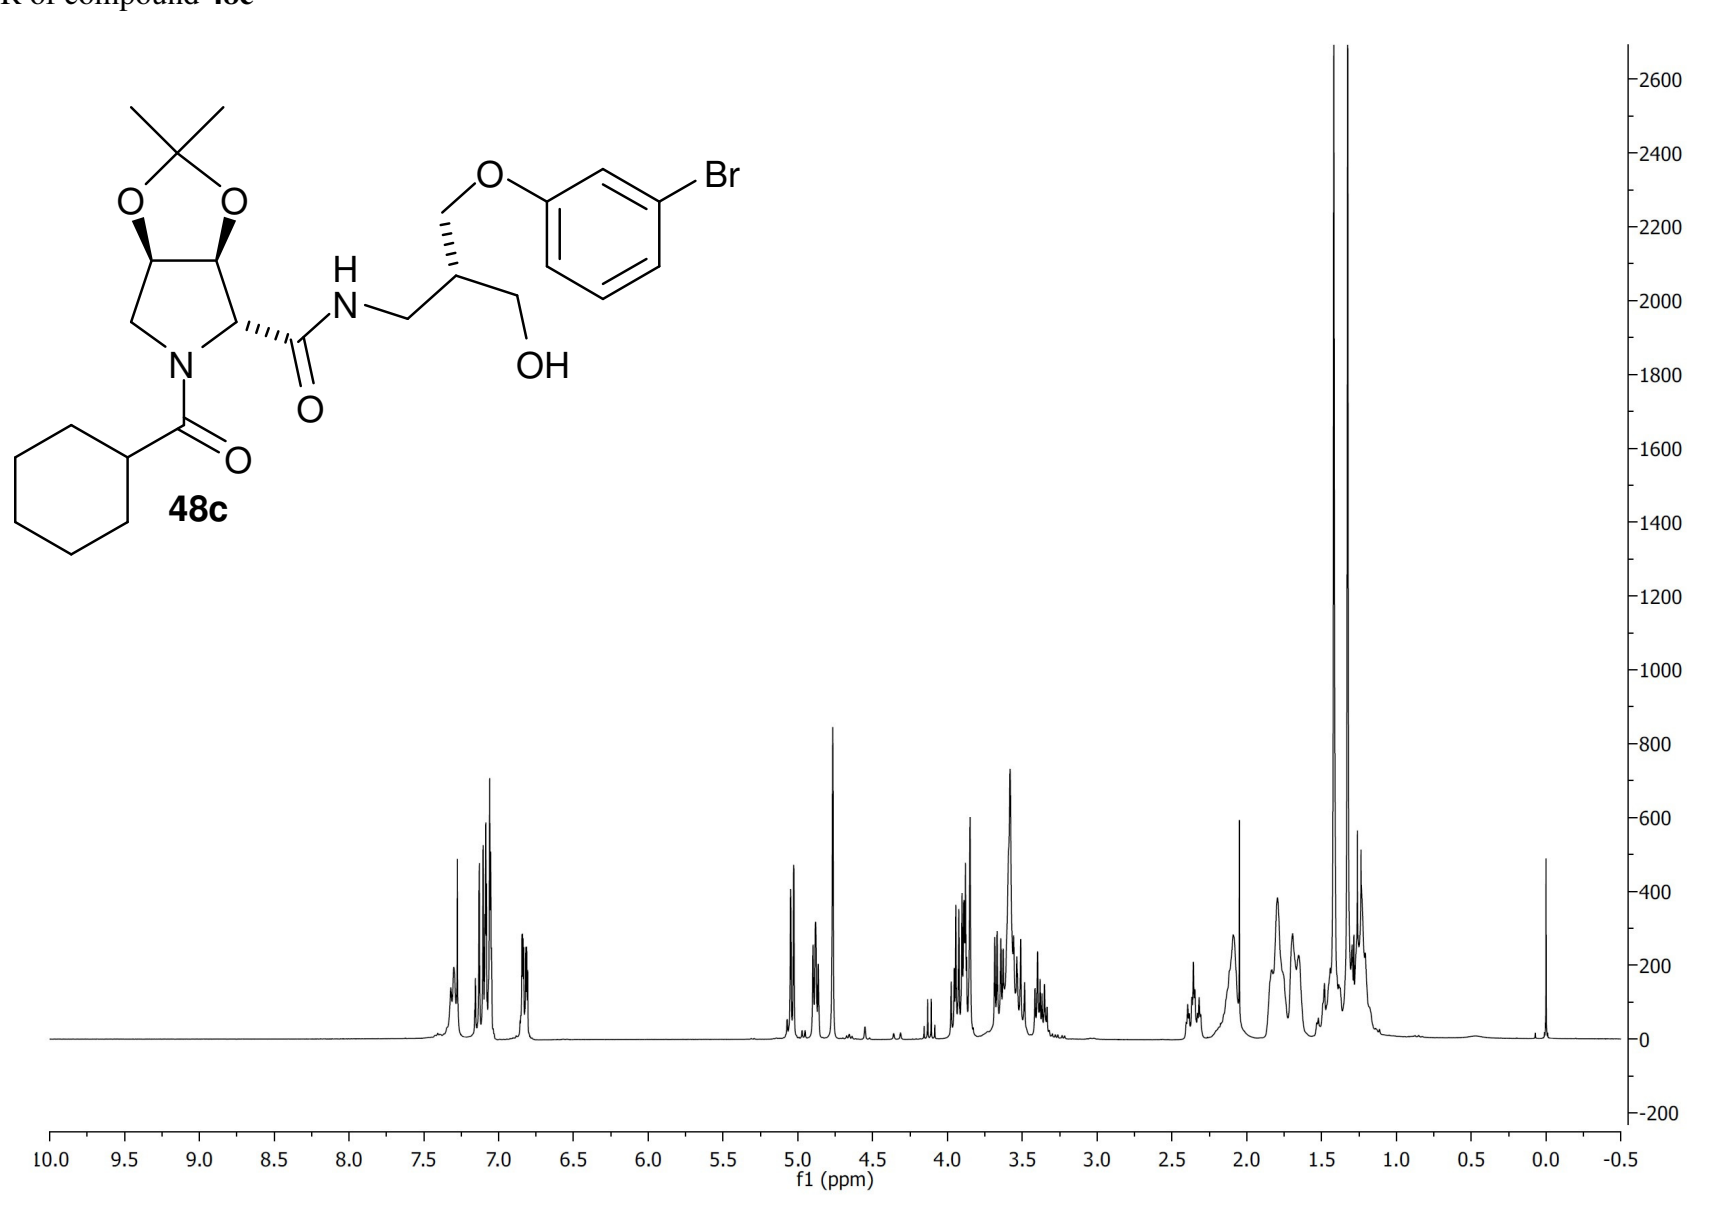



$^{13}\text{C}$  NMR of compound **48c**

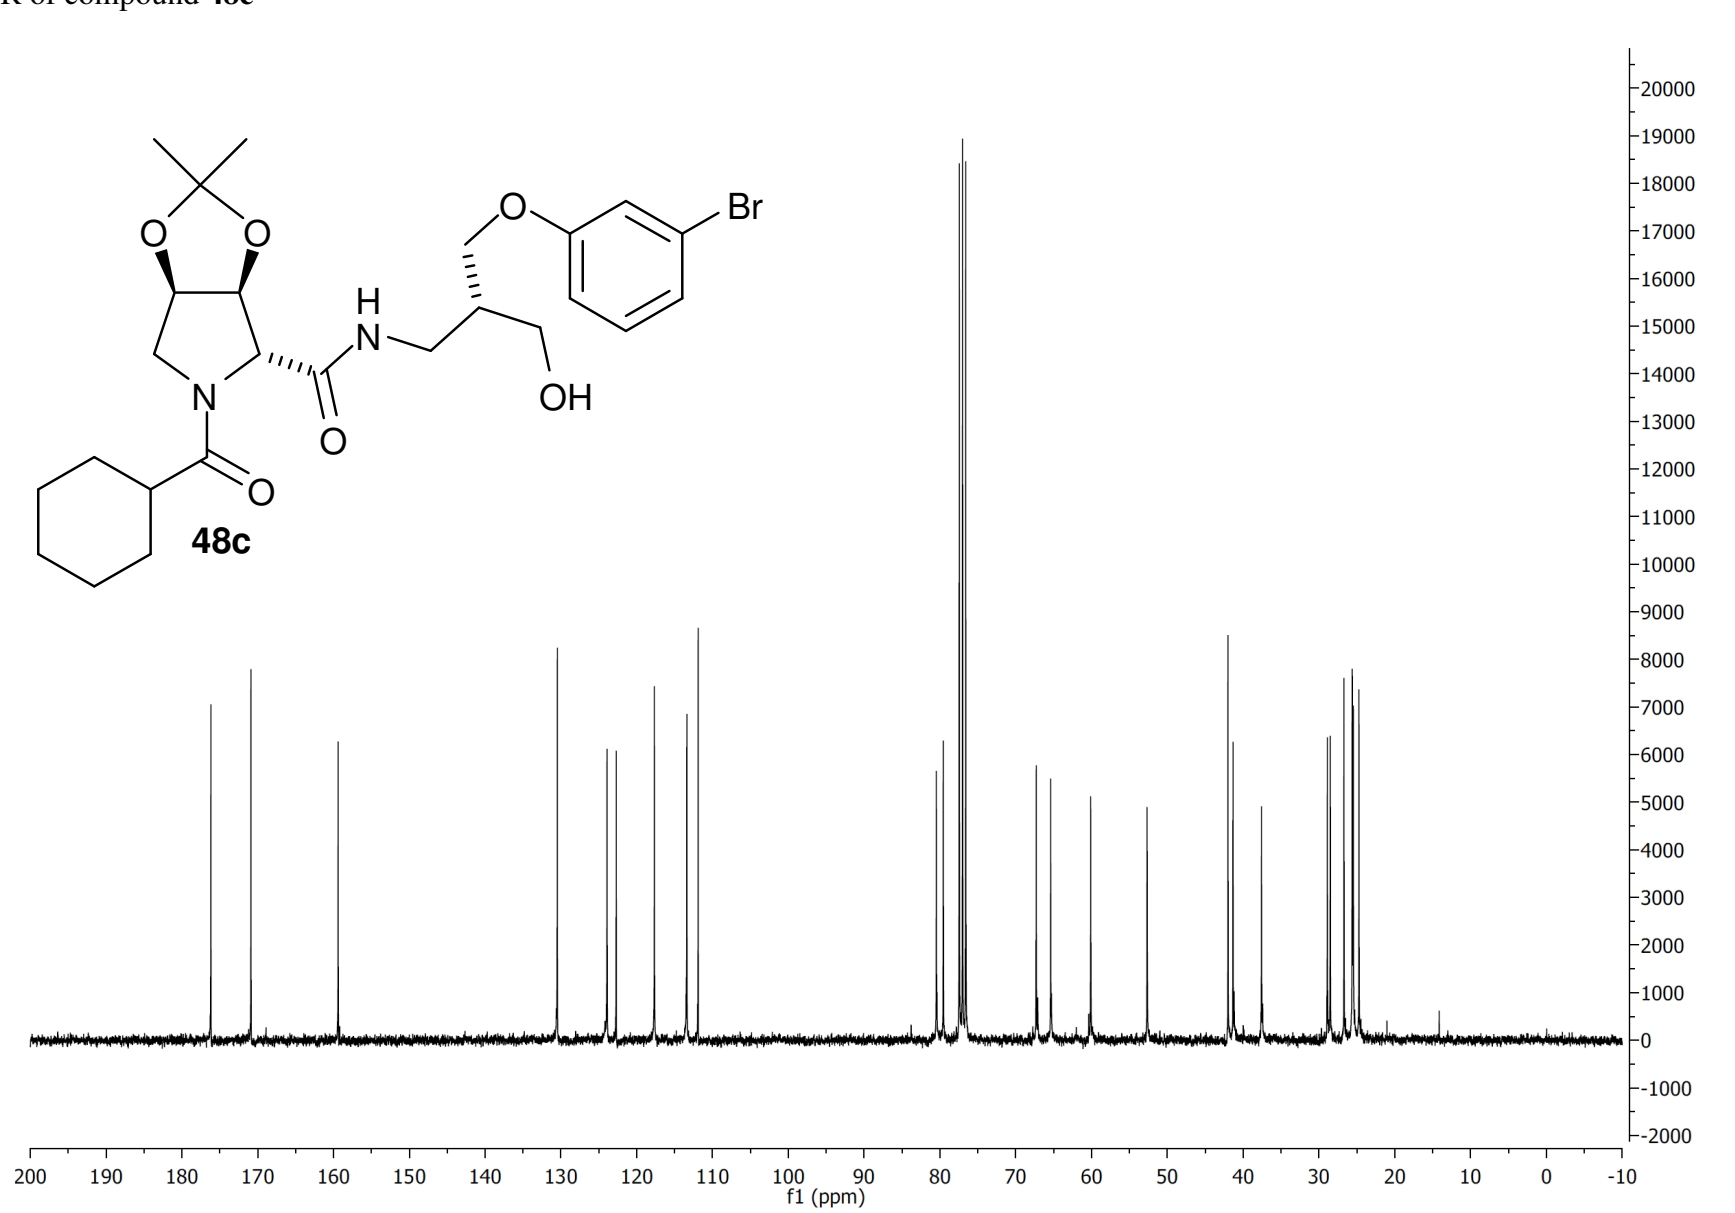

<sup>1</sup>H NMR of compound **49a**

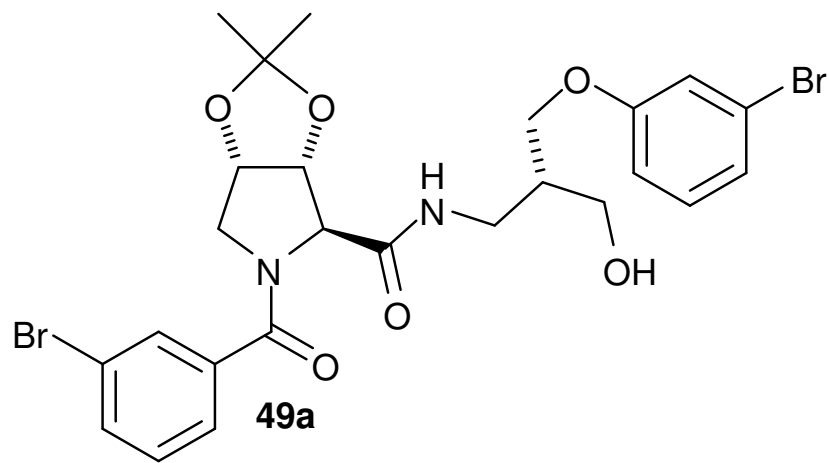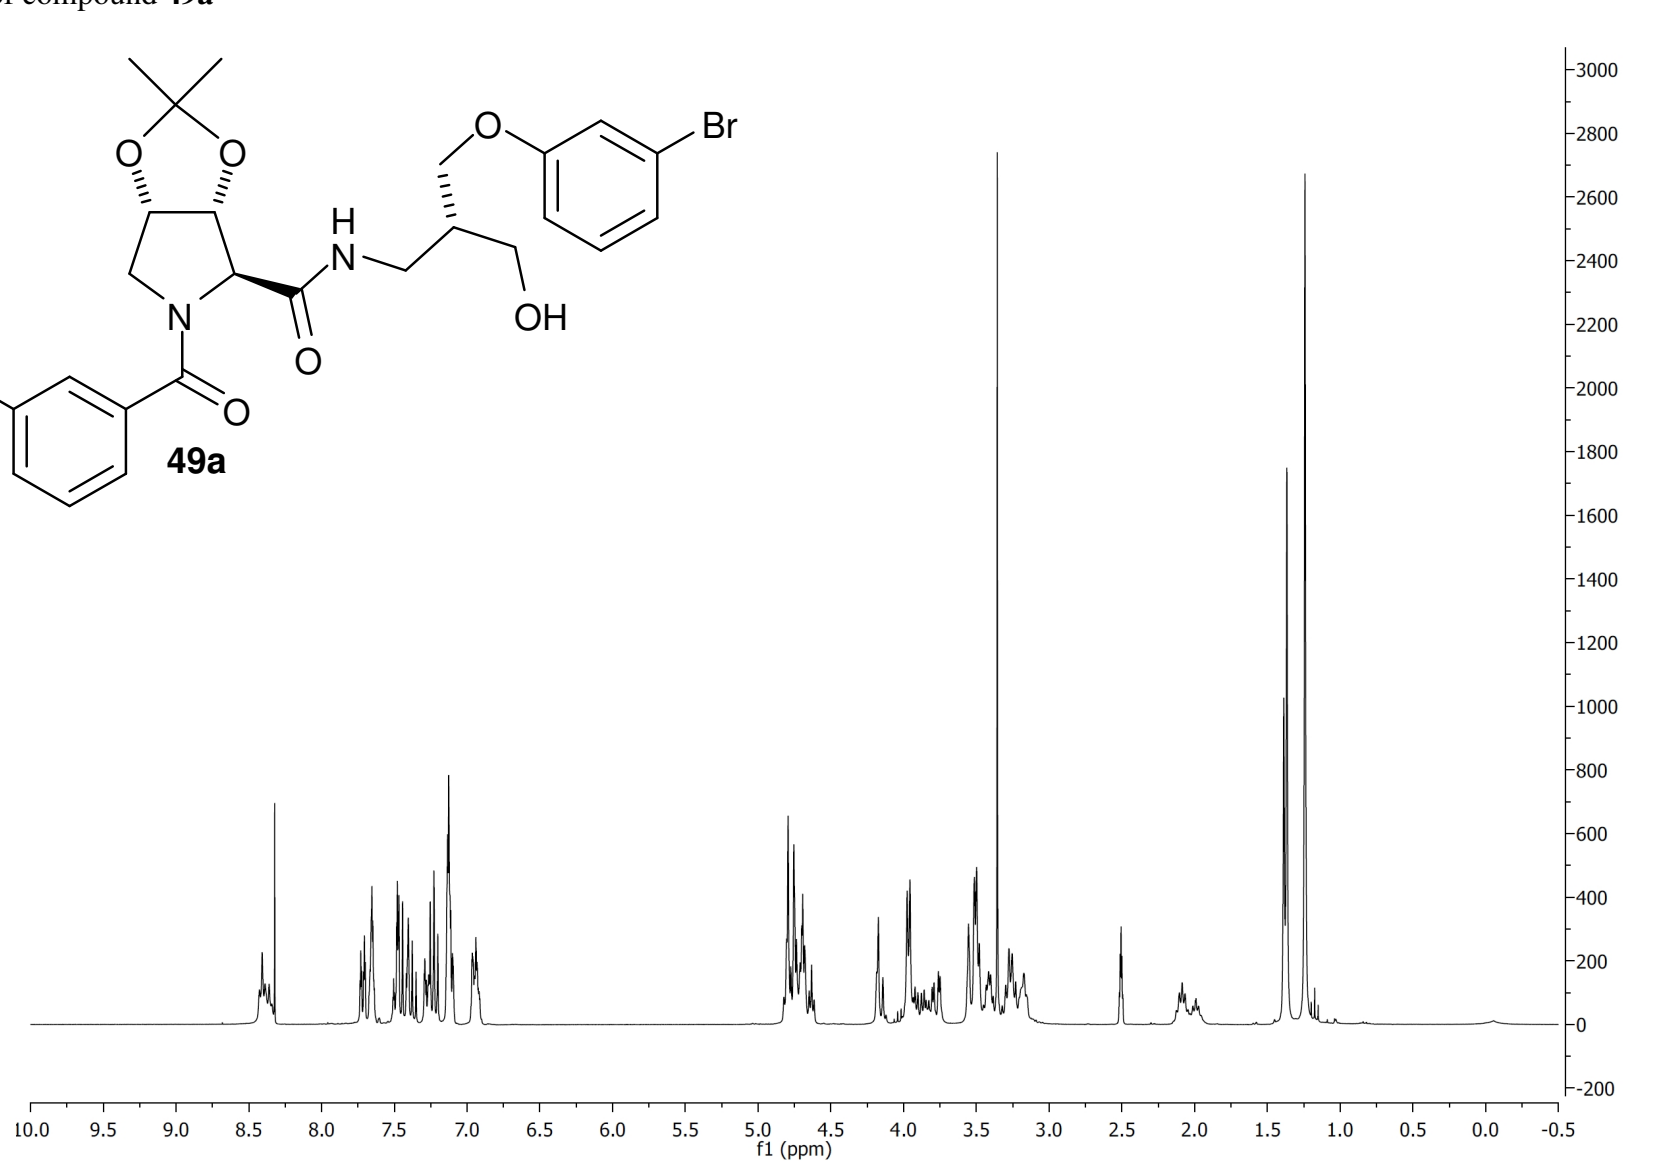

$^{13}\text{C}$  NMR of compound **49a**

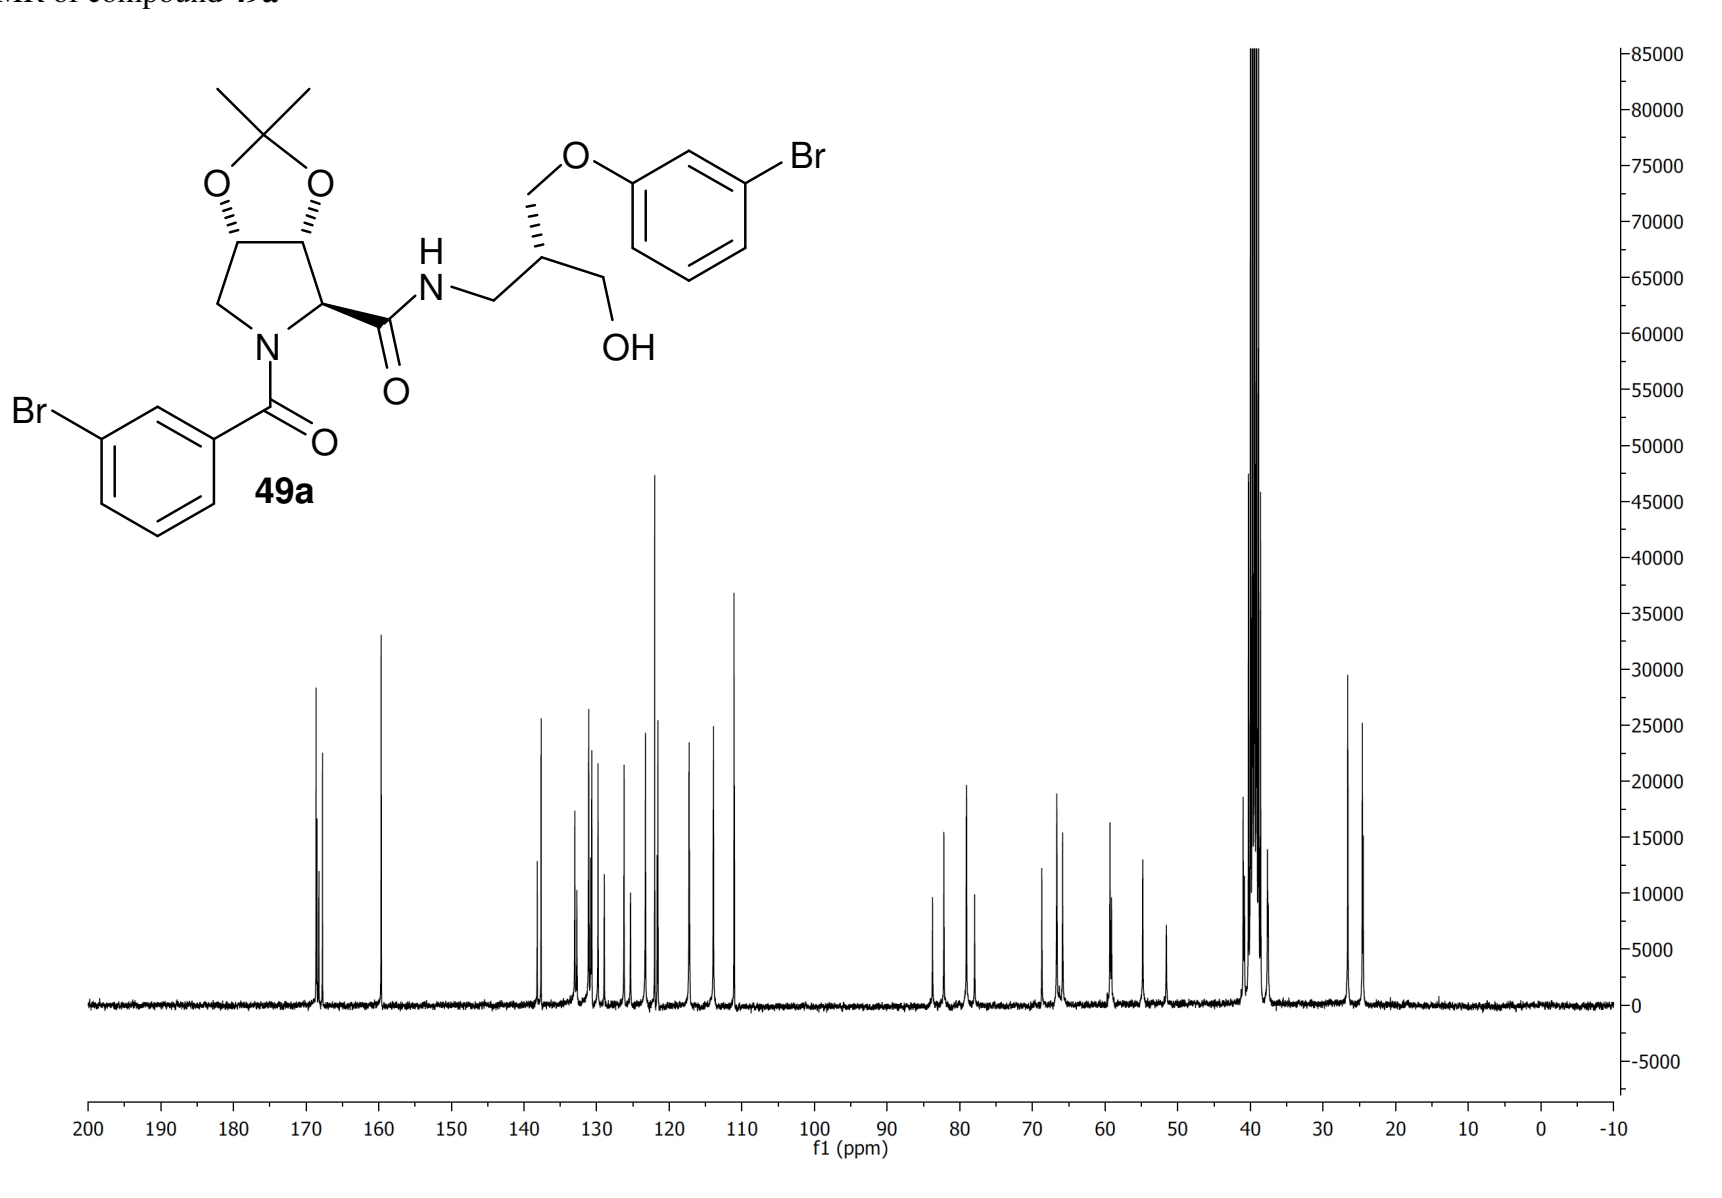

<sup>1</sup>H NMR of compound **50a**

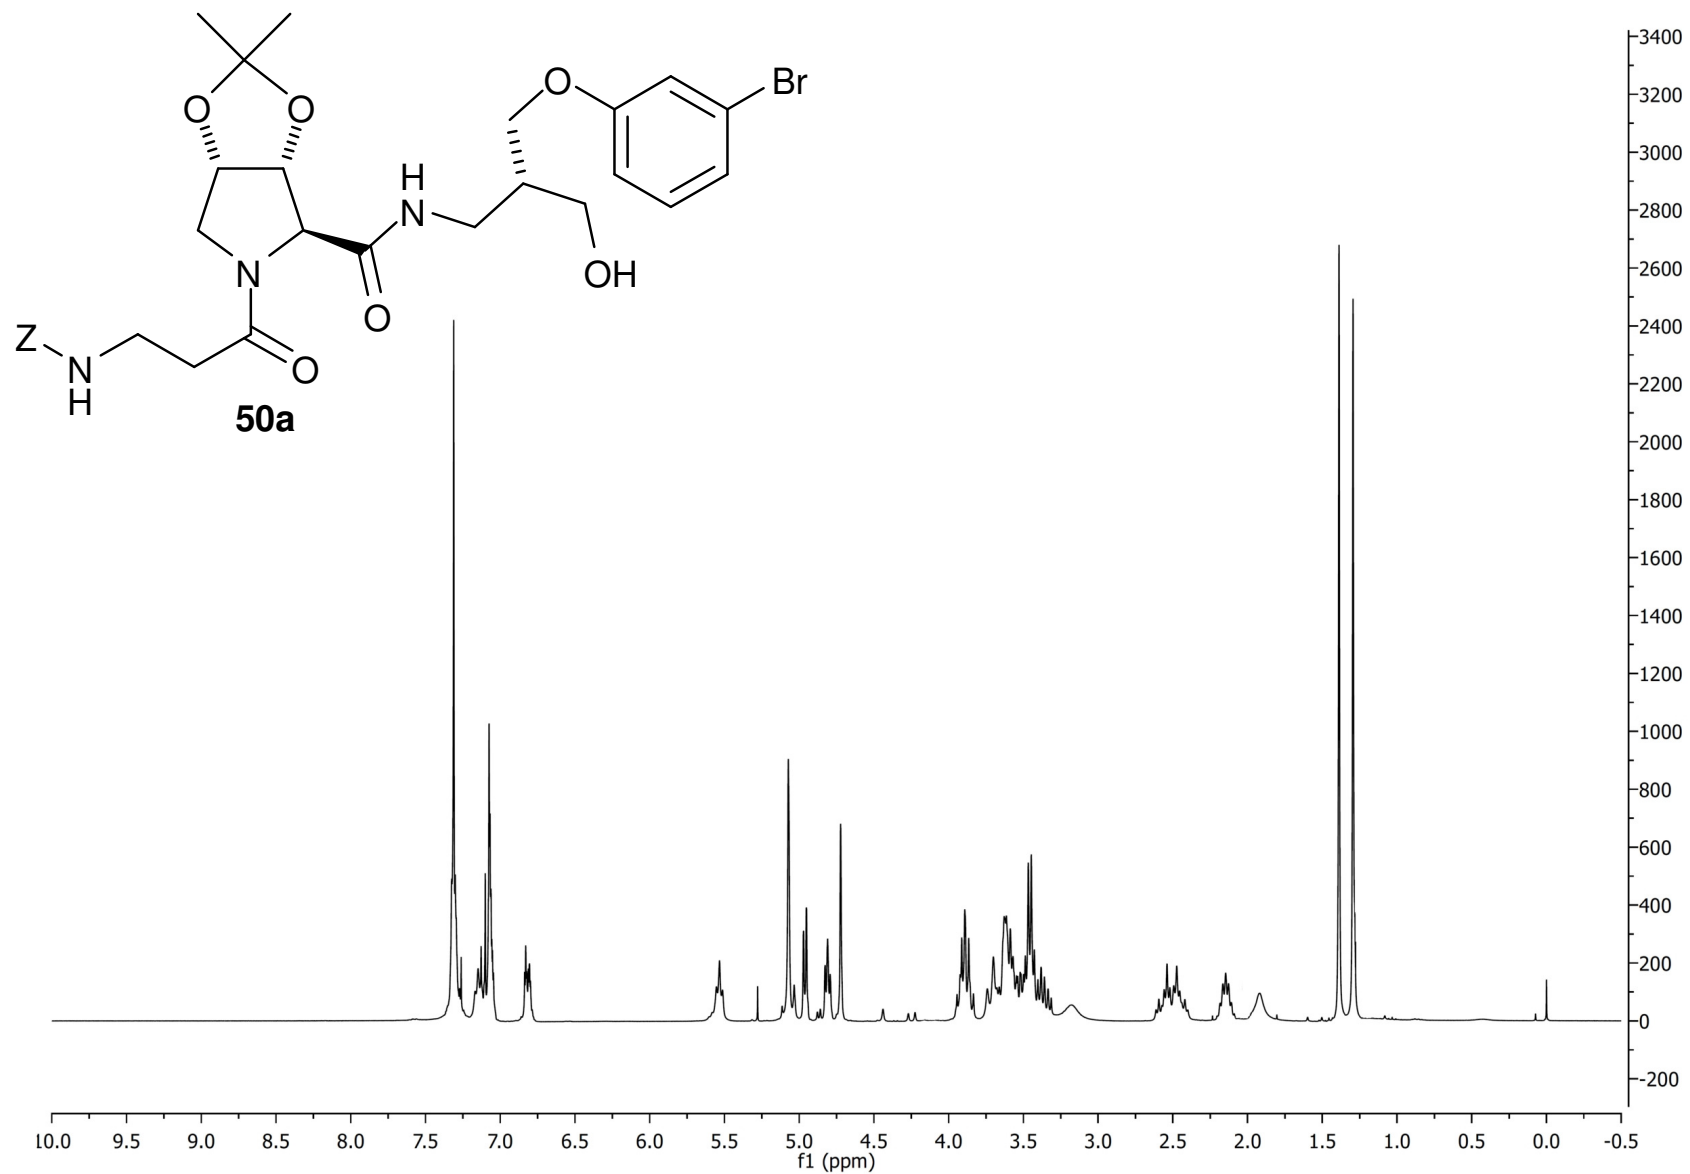

$^{13}\text{C}$  NMR of compound **50a**

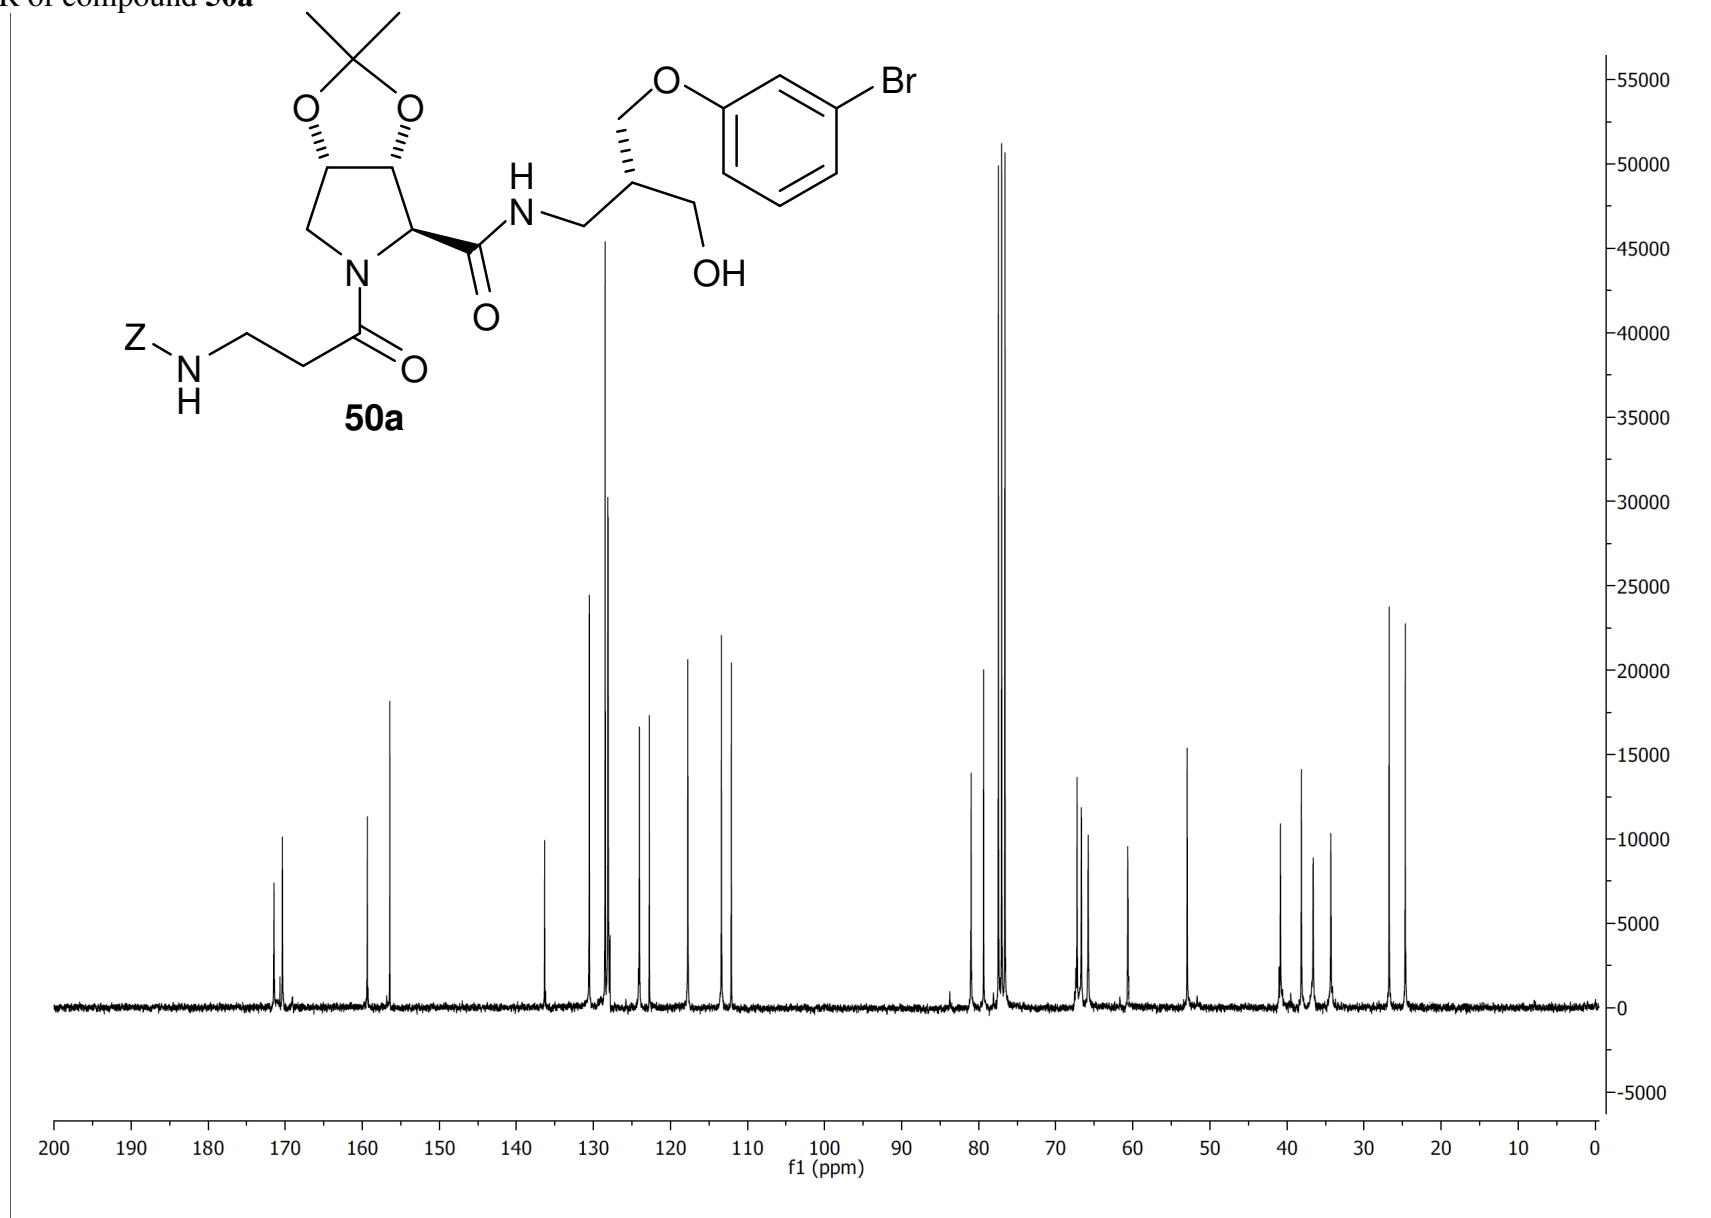

$^1\text{H}$  NMR of compound **50c**

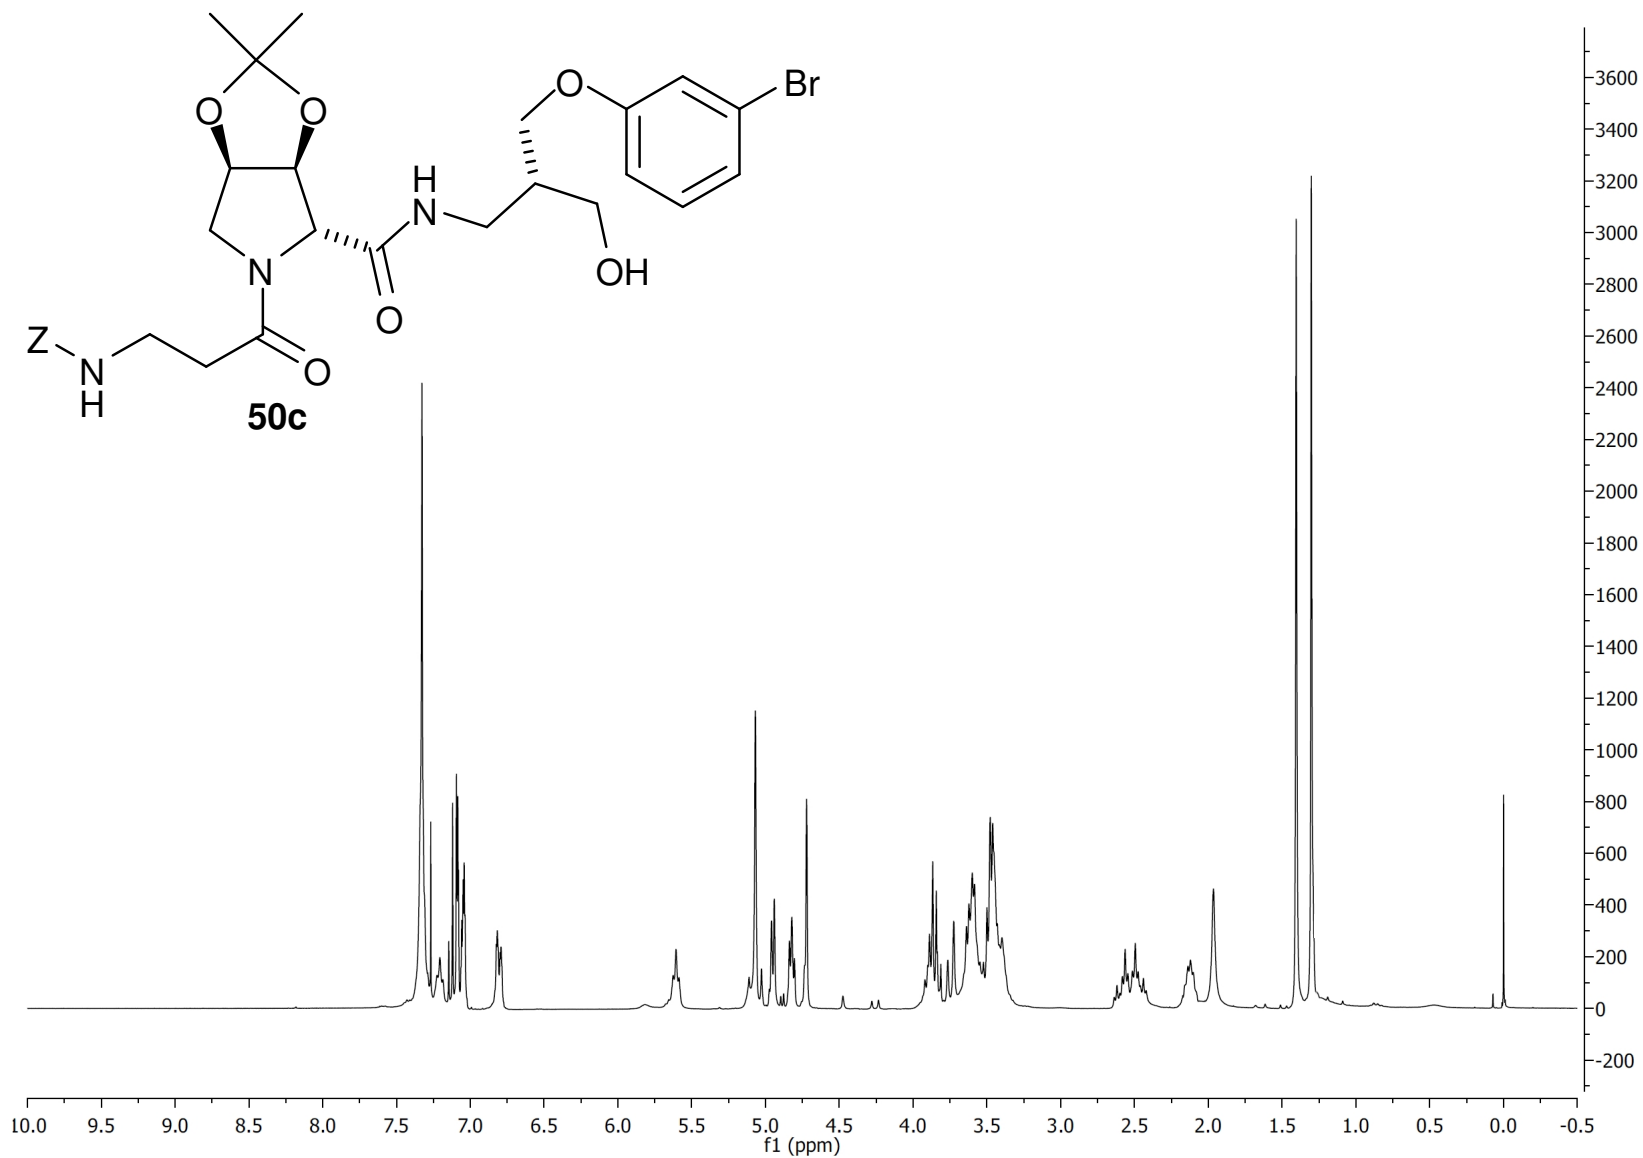

$^{13}\text{C}$  NMR of compound **50c**

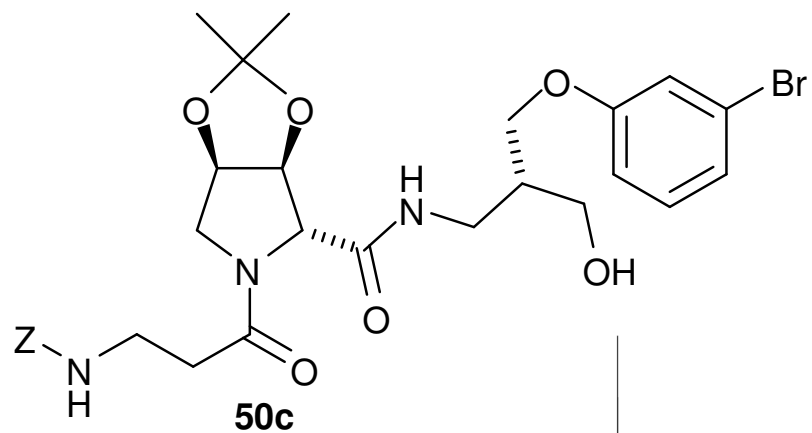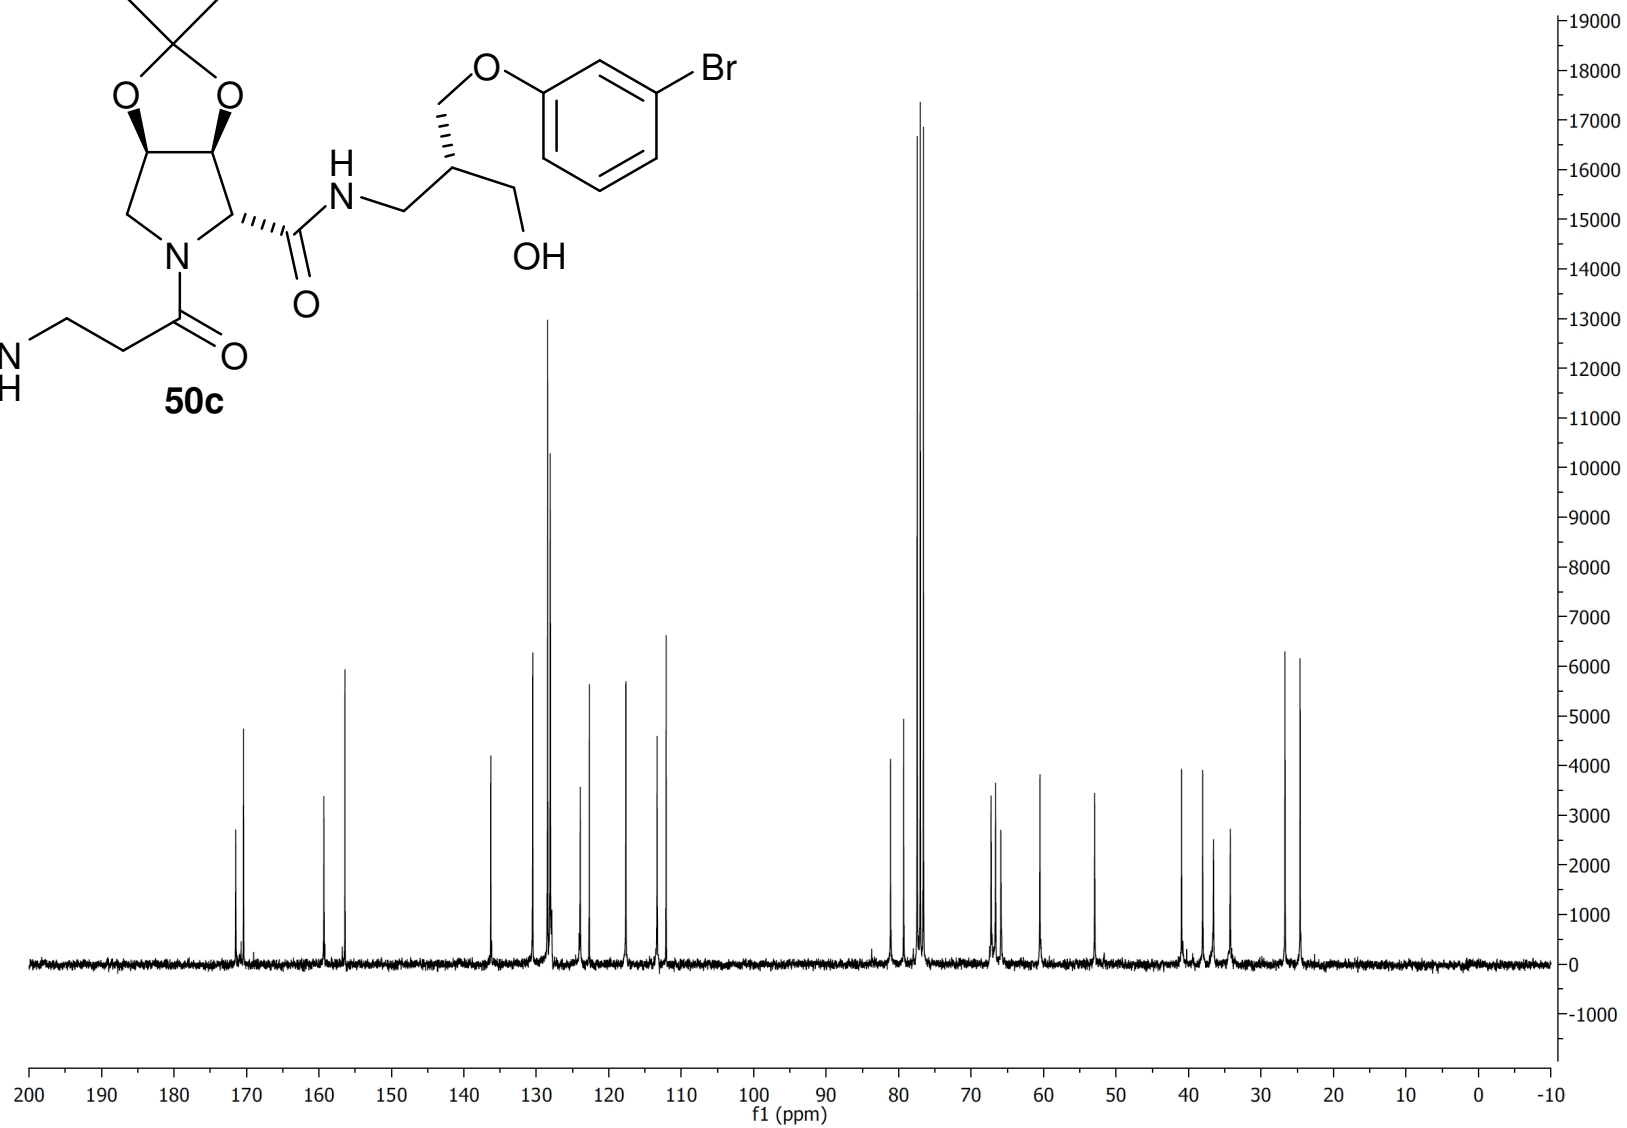

<sup>1</sup>H NMR of compound **51a**

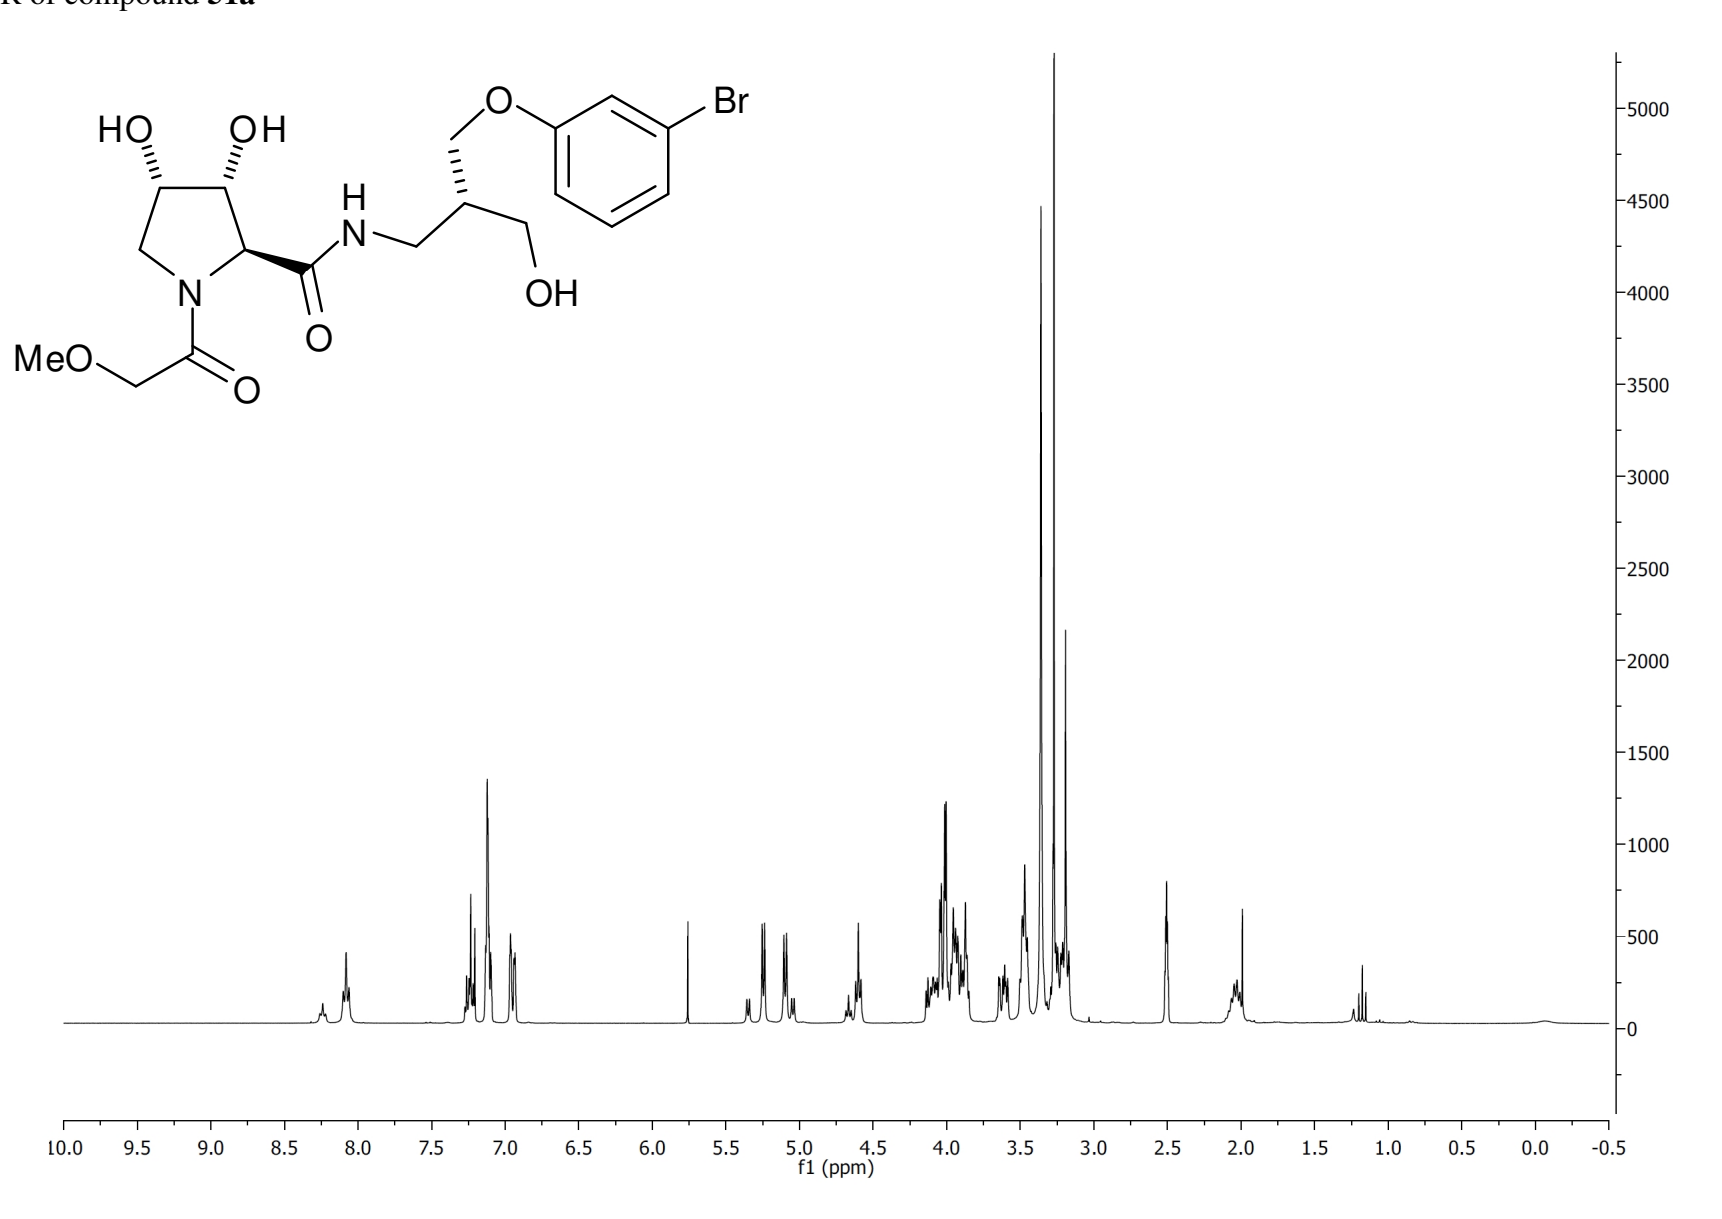



$^{13}\text{C}$  NMR of compound **51a**

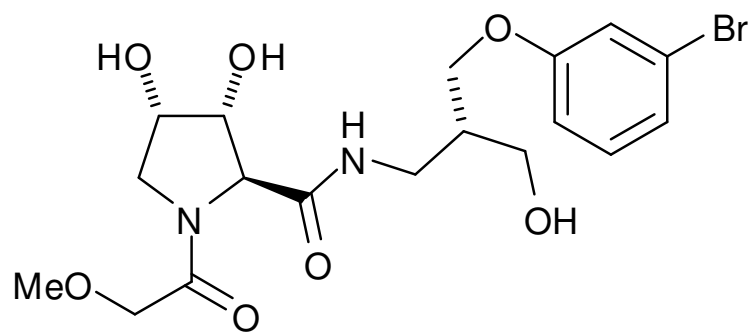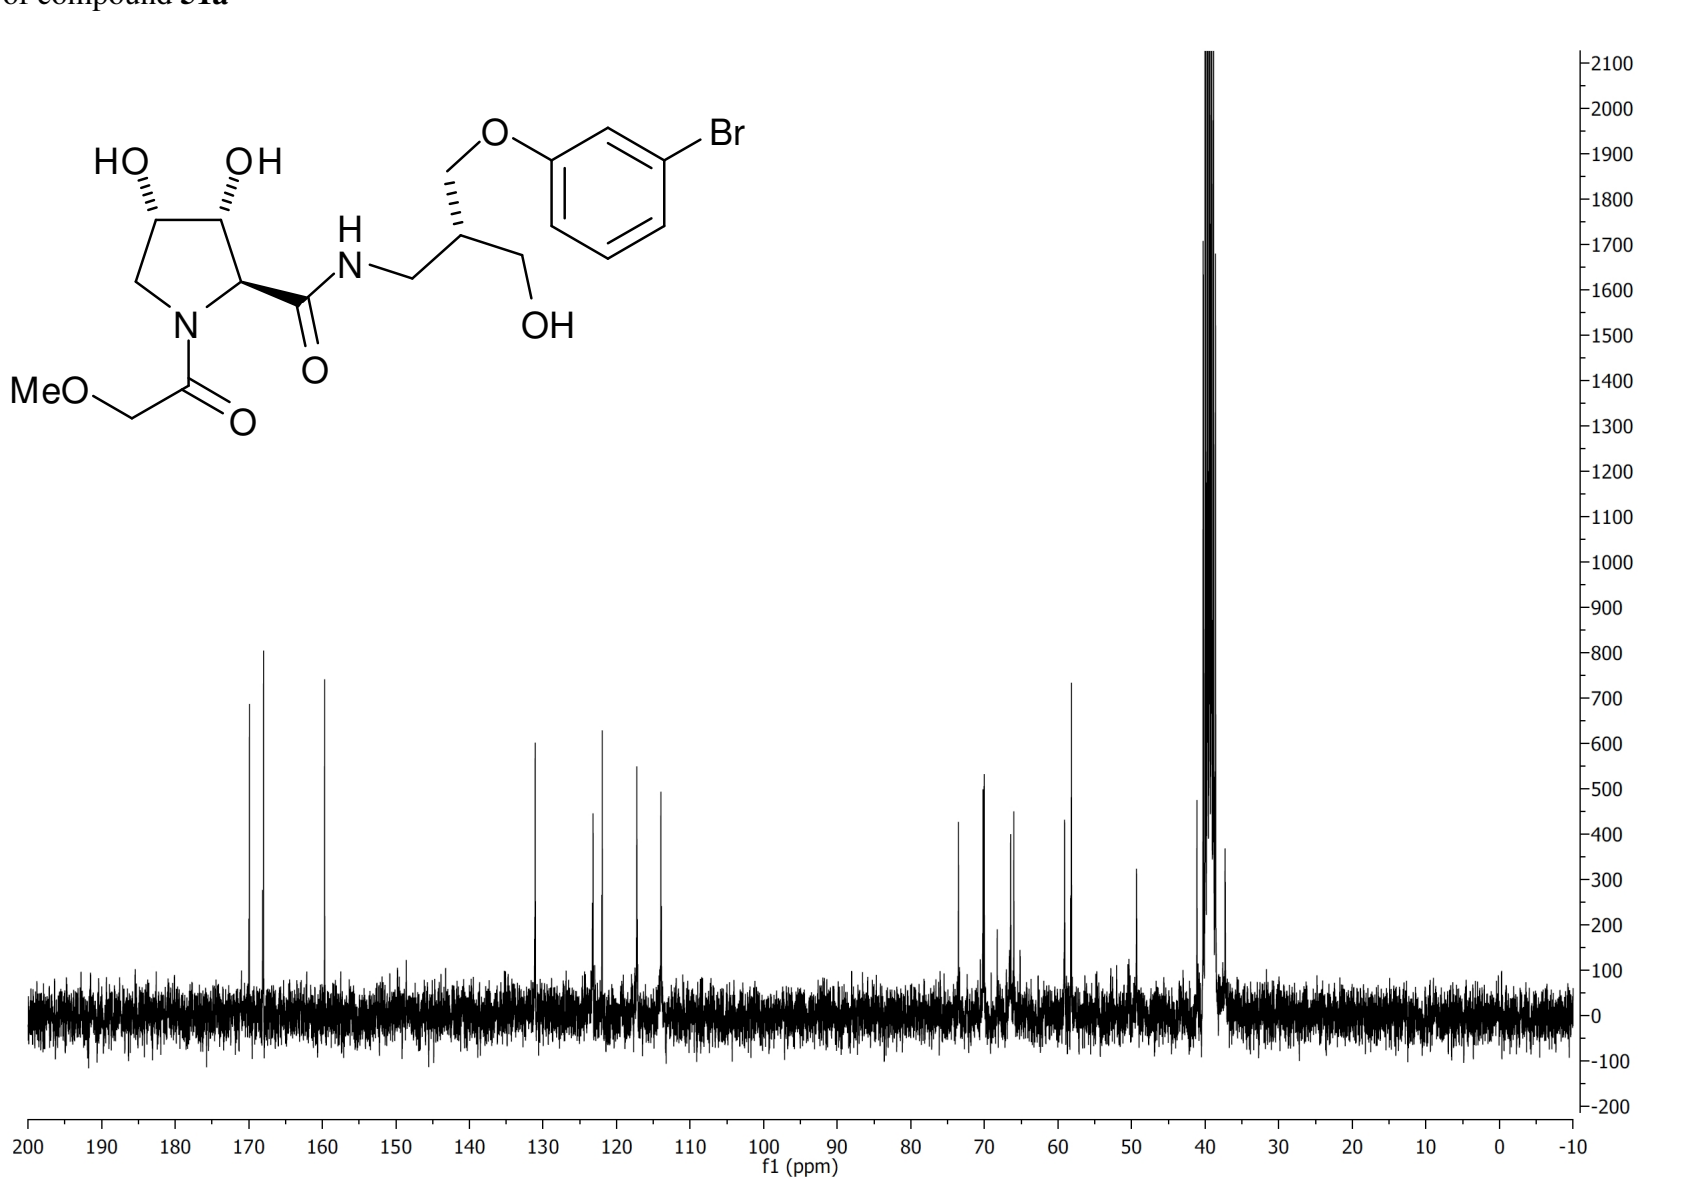

<sup>1</sup>H NMR of compound **51c**

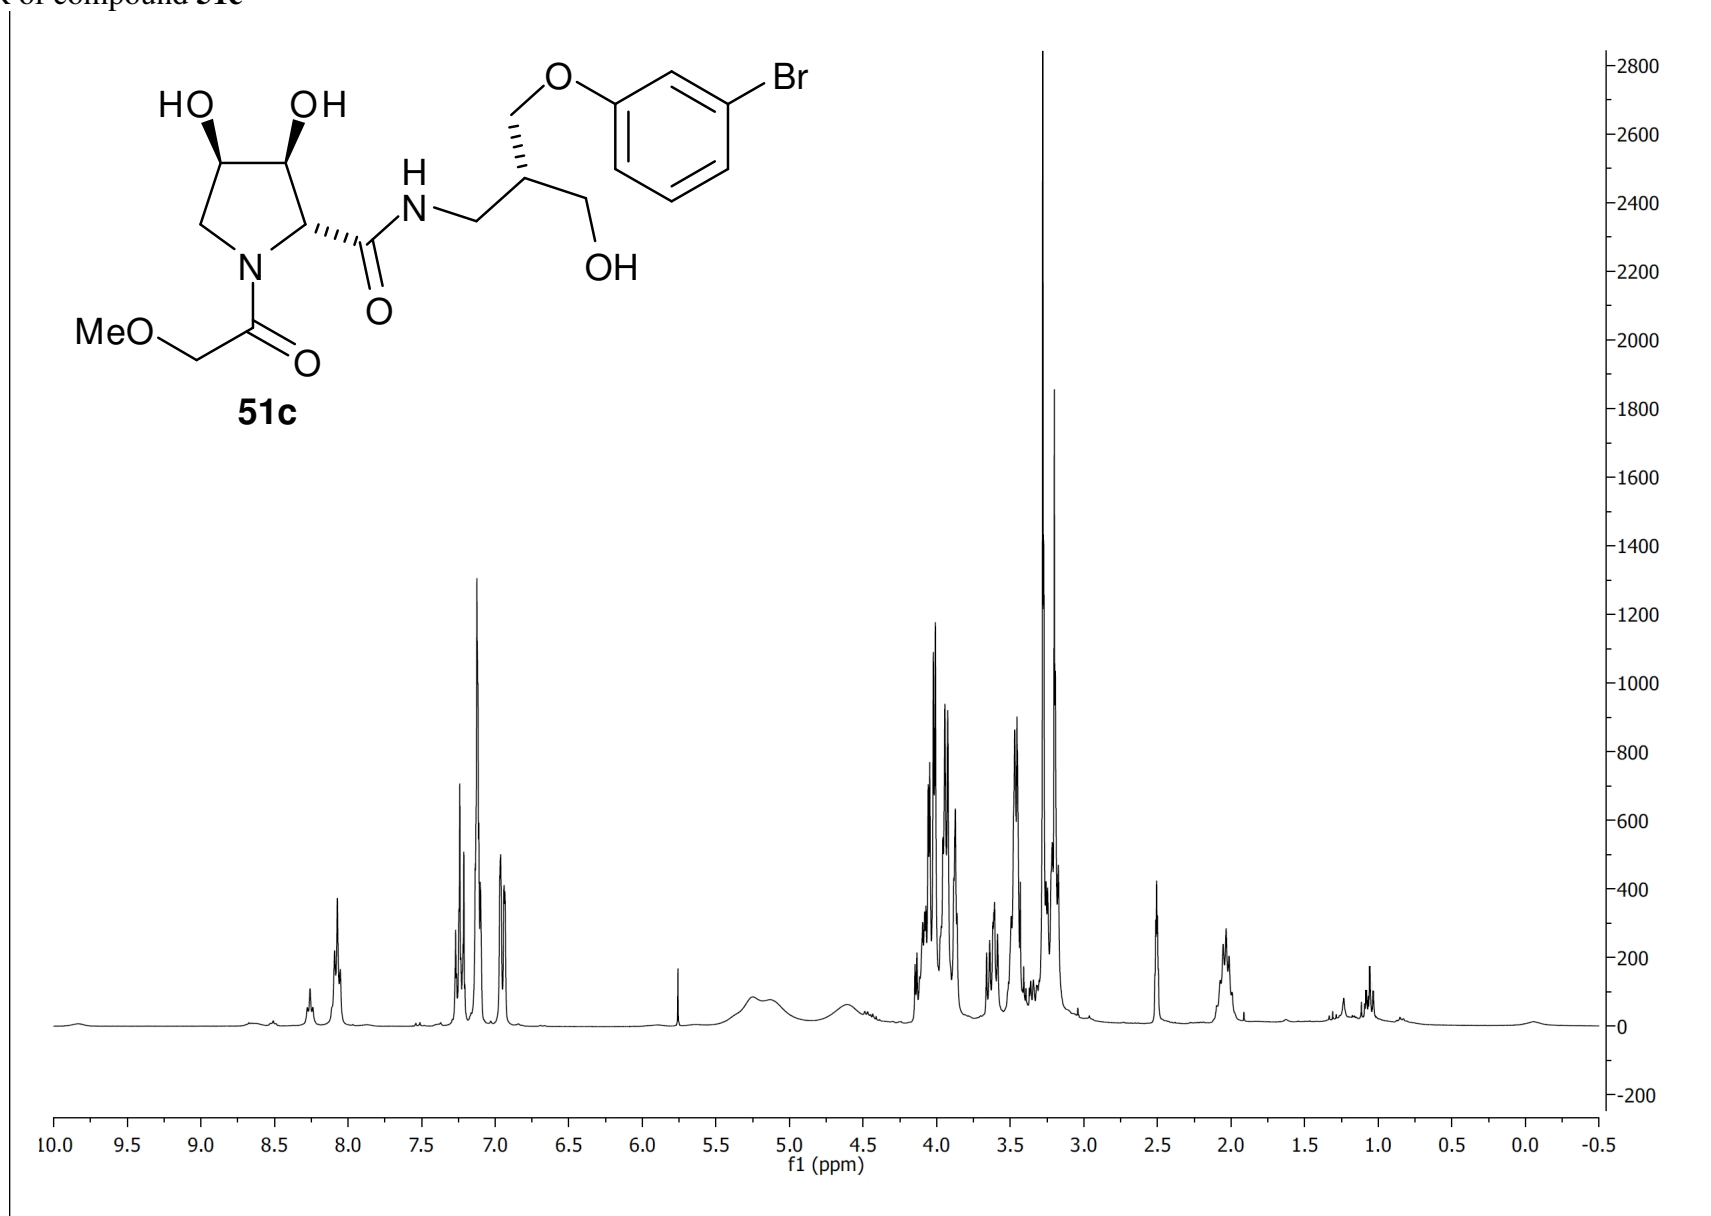

$^{13}\text{C}$  NMR of compound **51c**

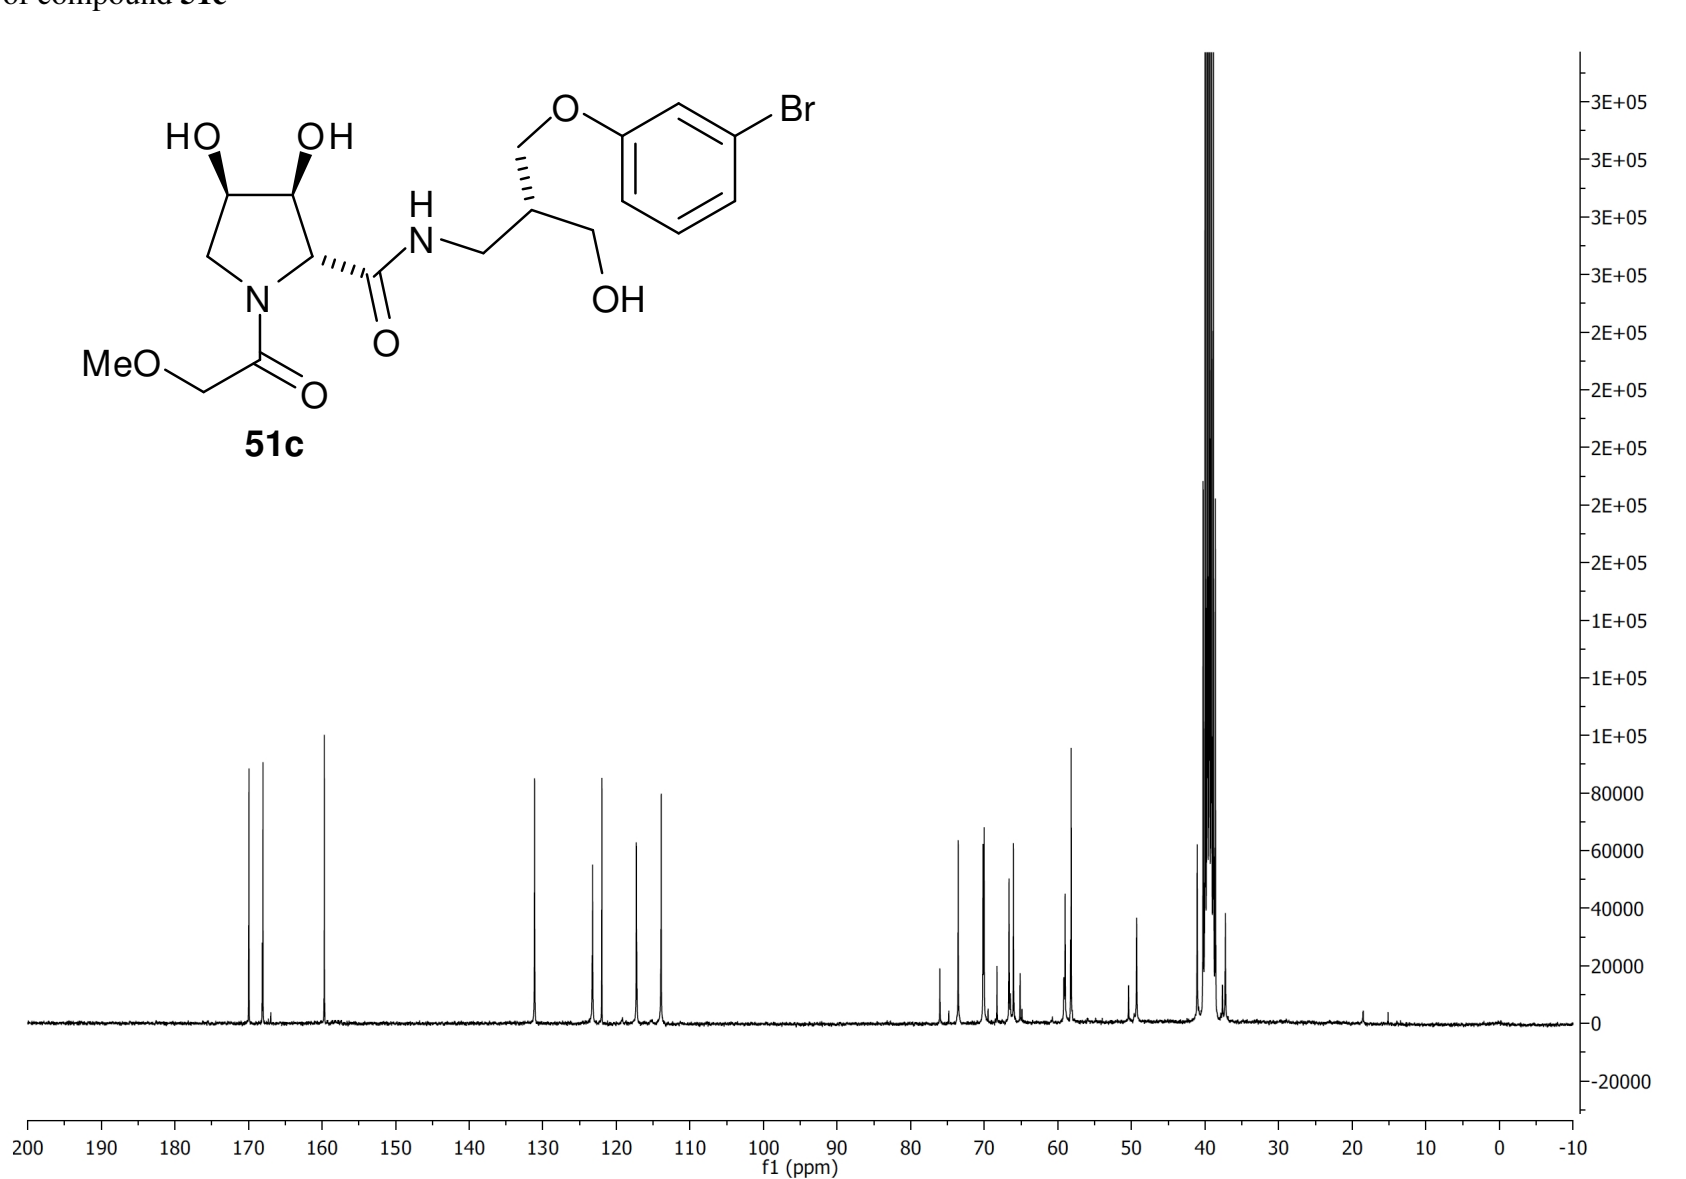

<sup>1</sup>H NMR of compound **52a**

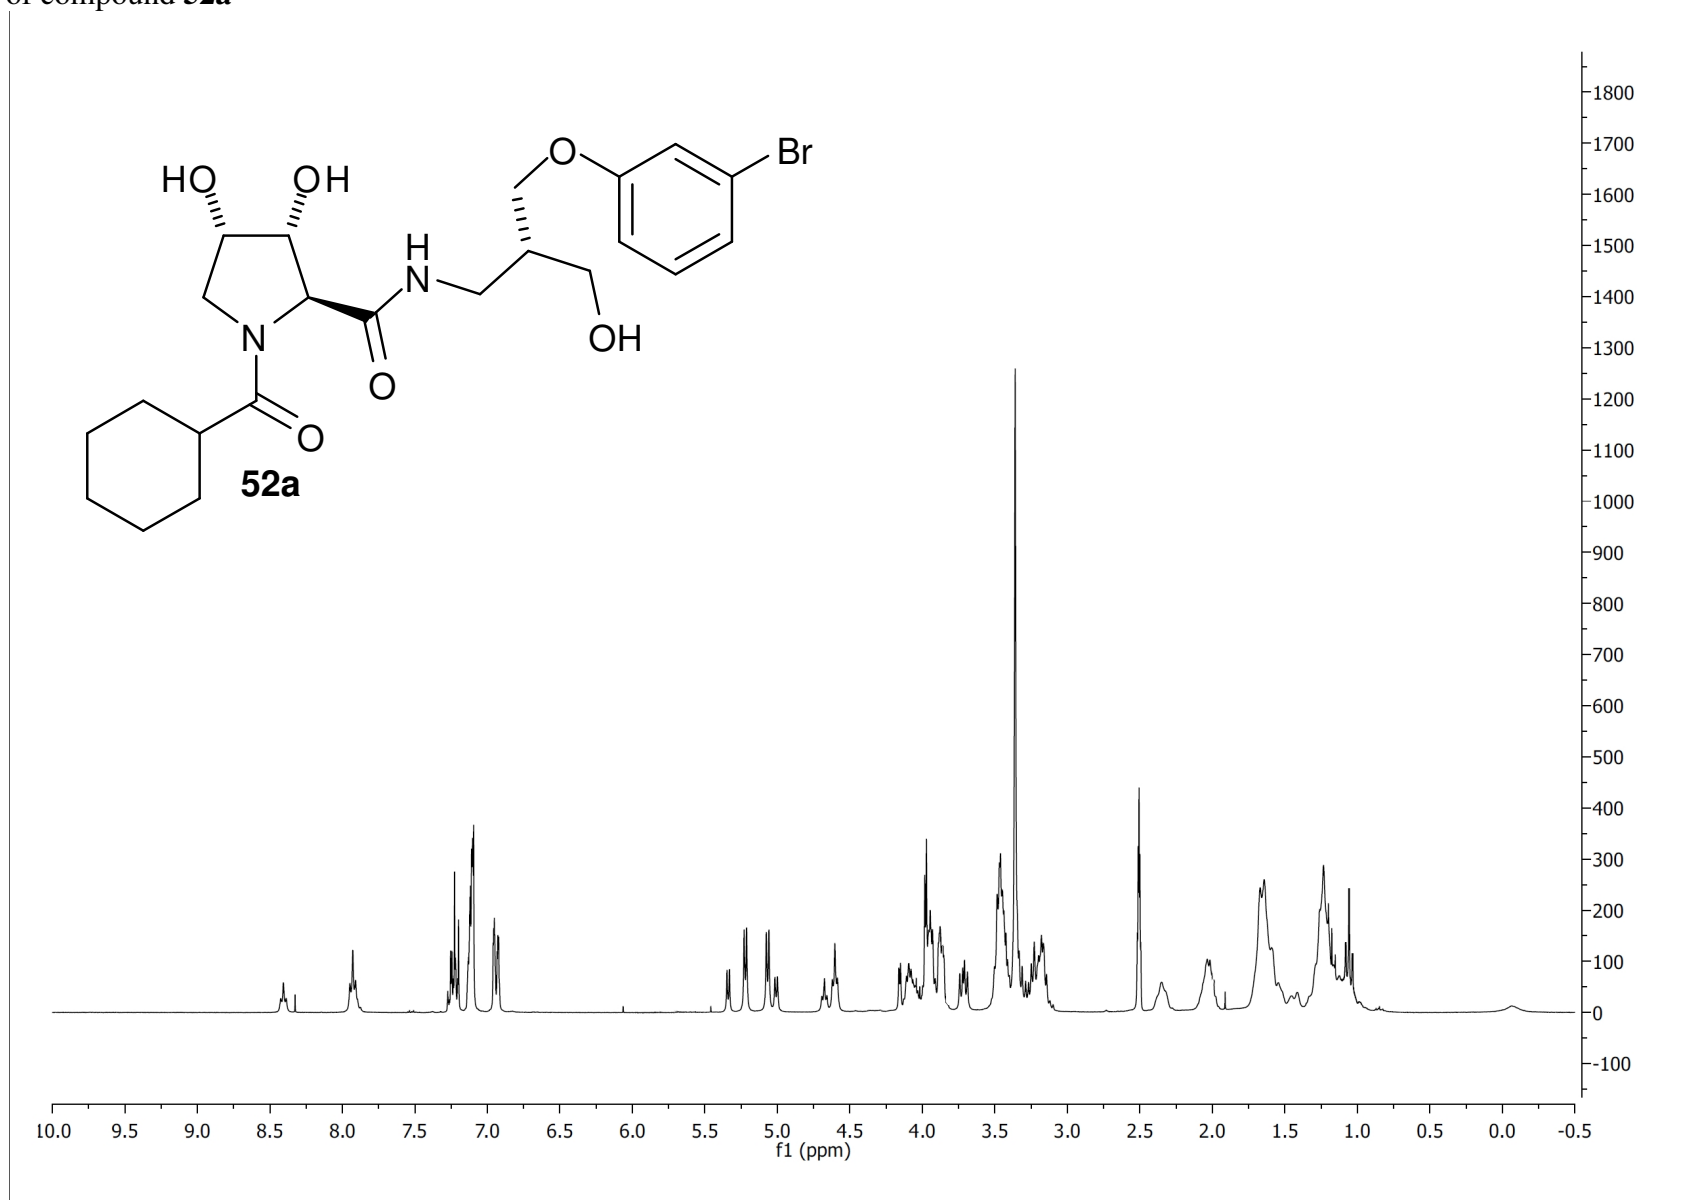

$^{13}\text{C}$  NMR of compound **52a**

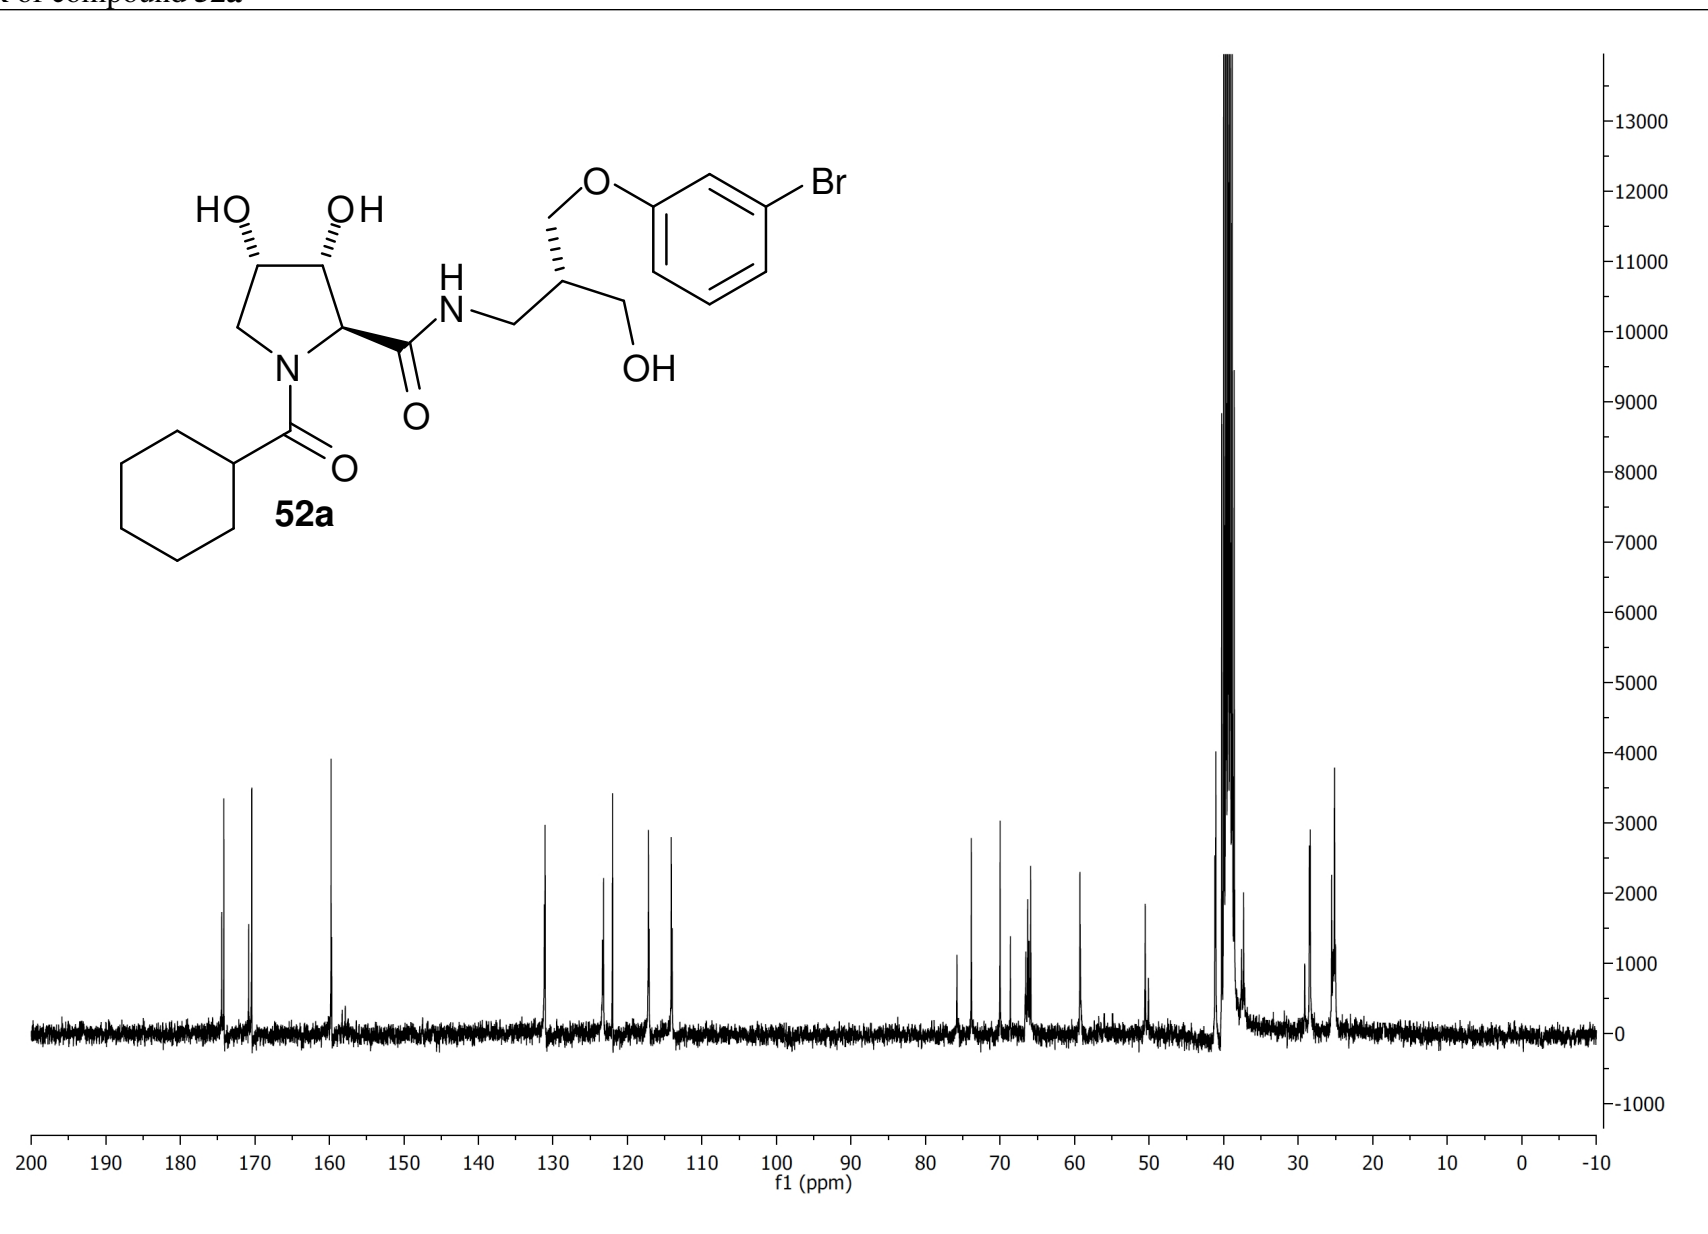

$^1\text{H}$  NMR of compound **53a**

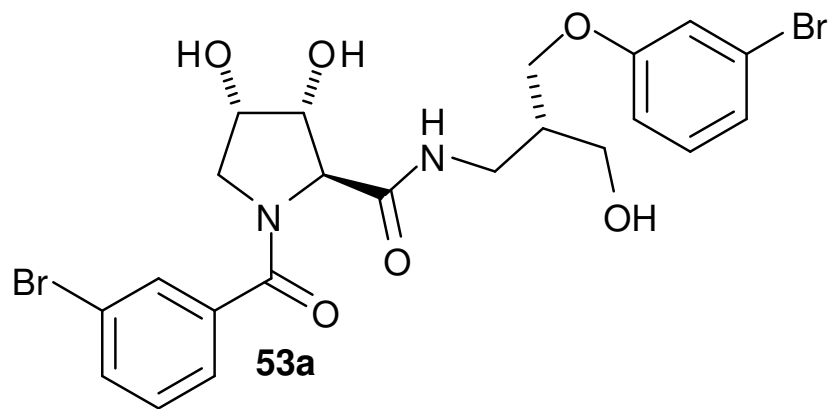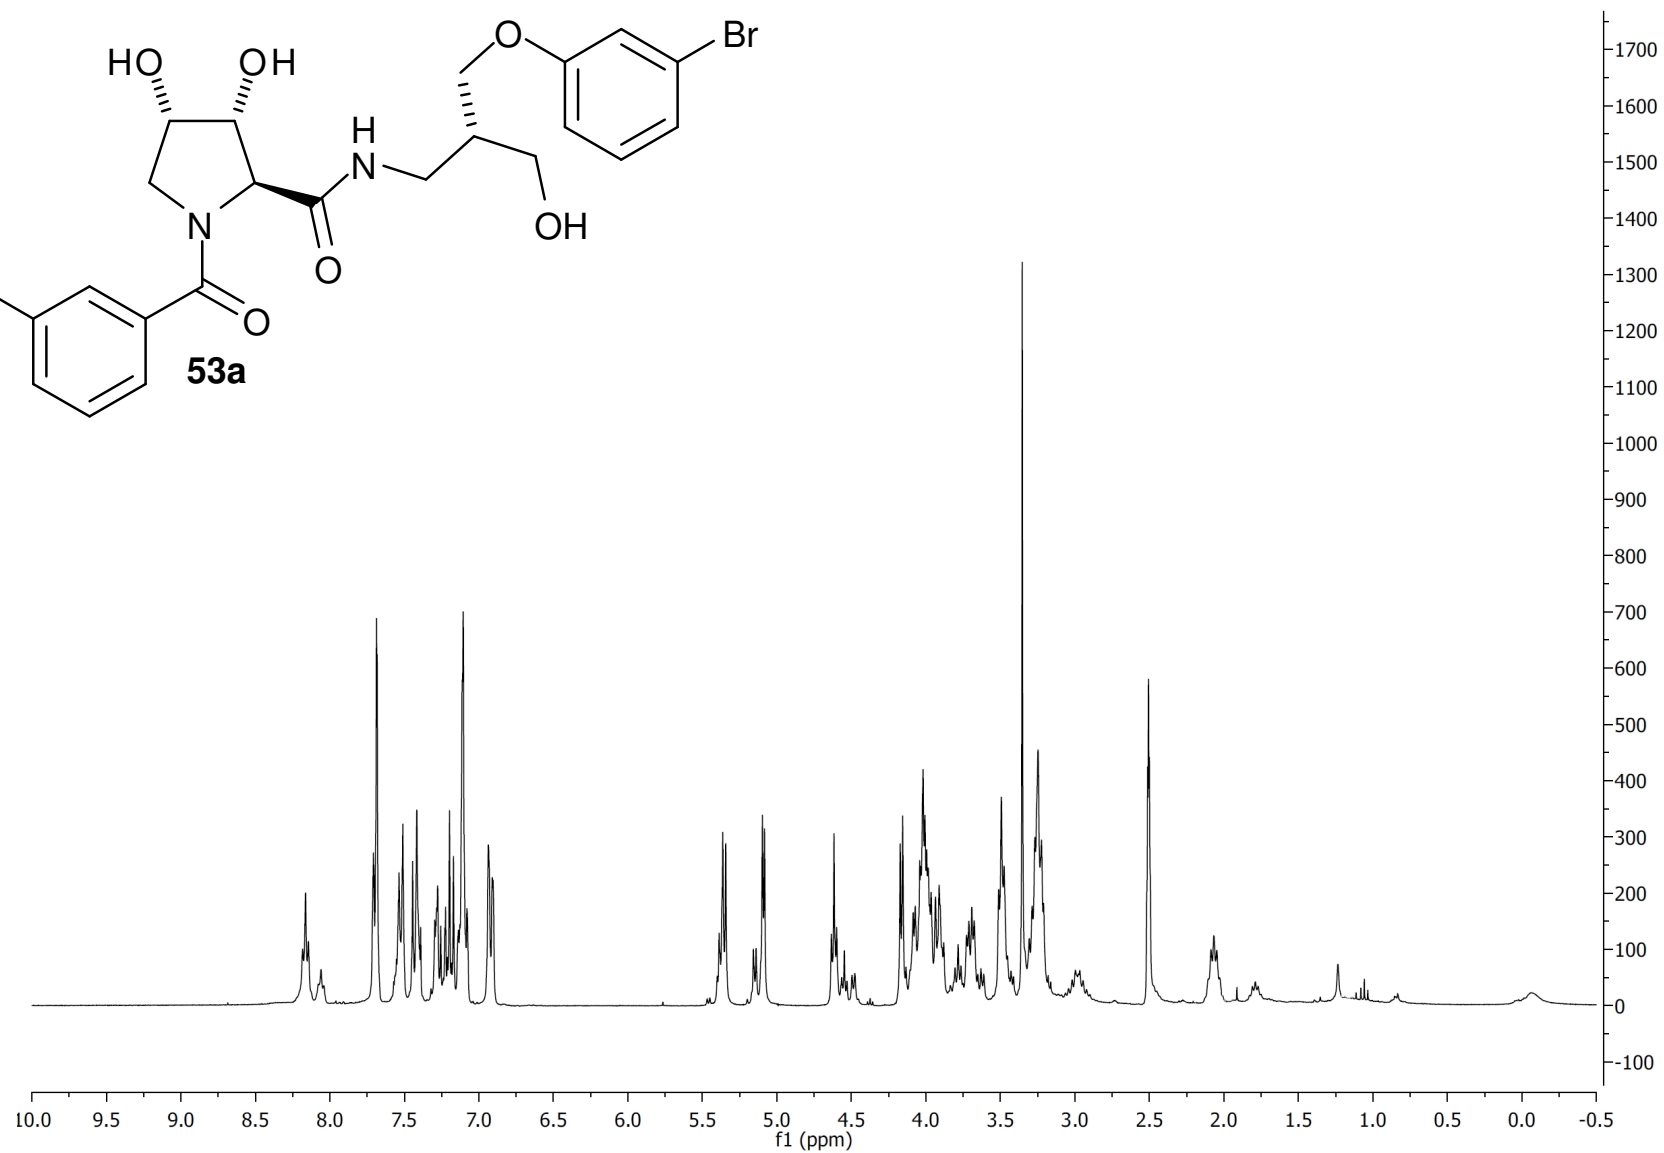

$^{13}\text{C}$  NMR of compound **53a**

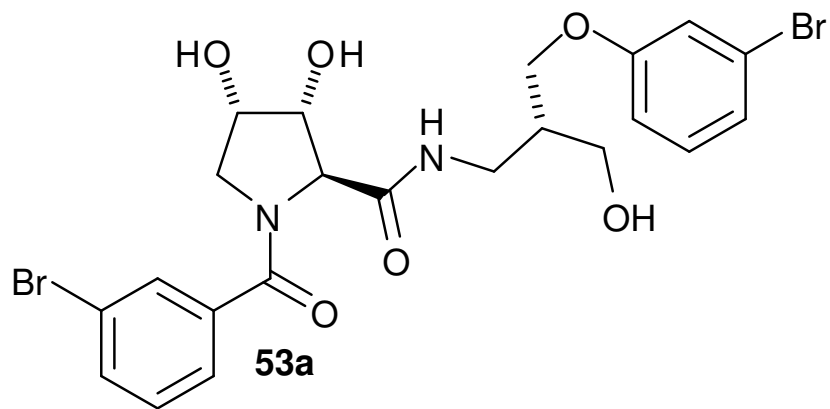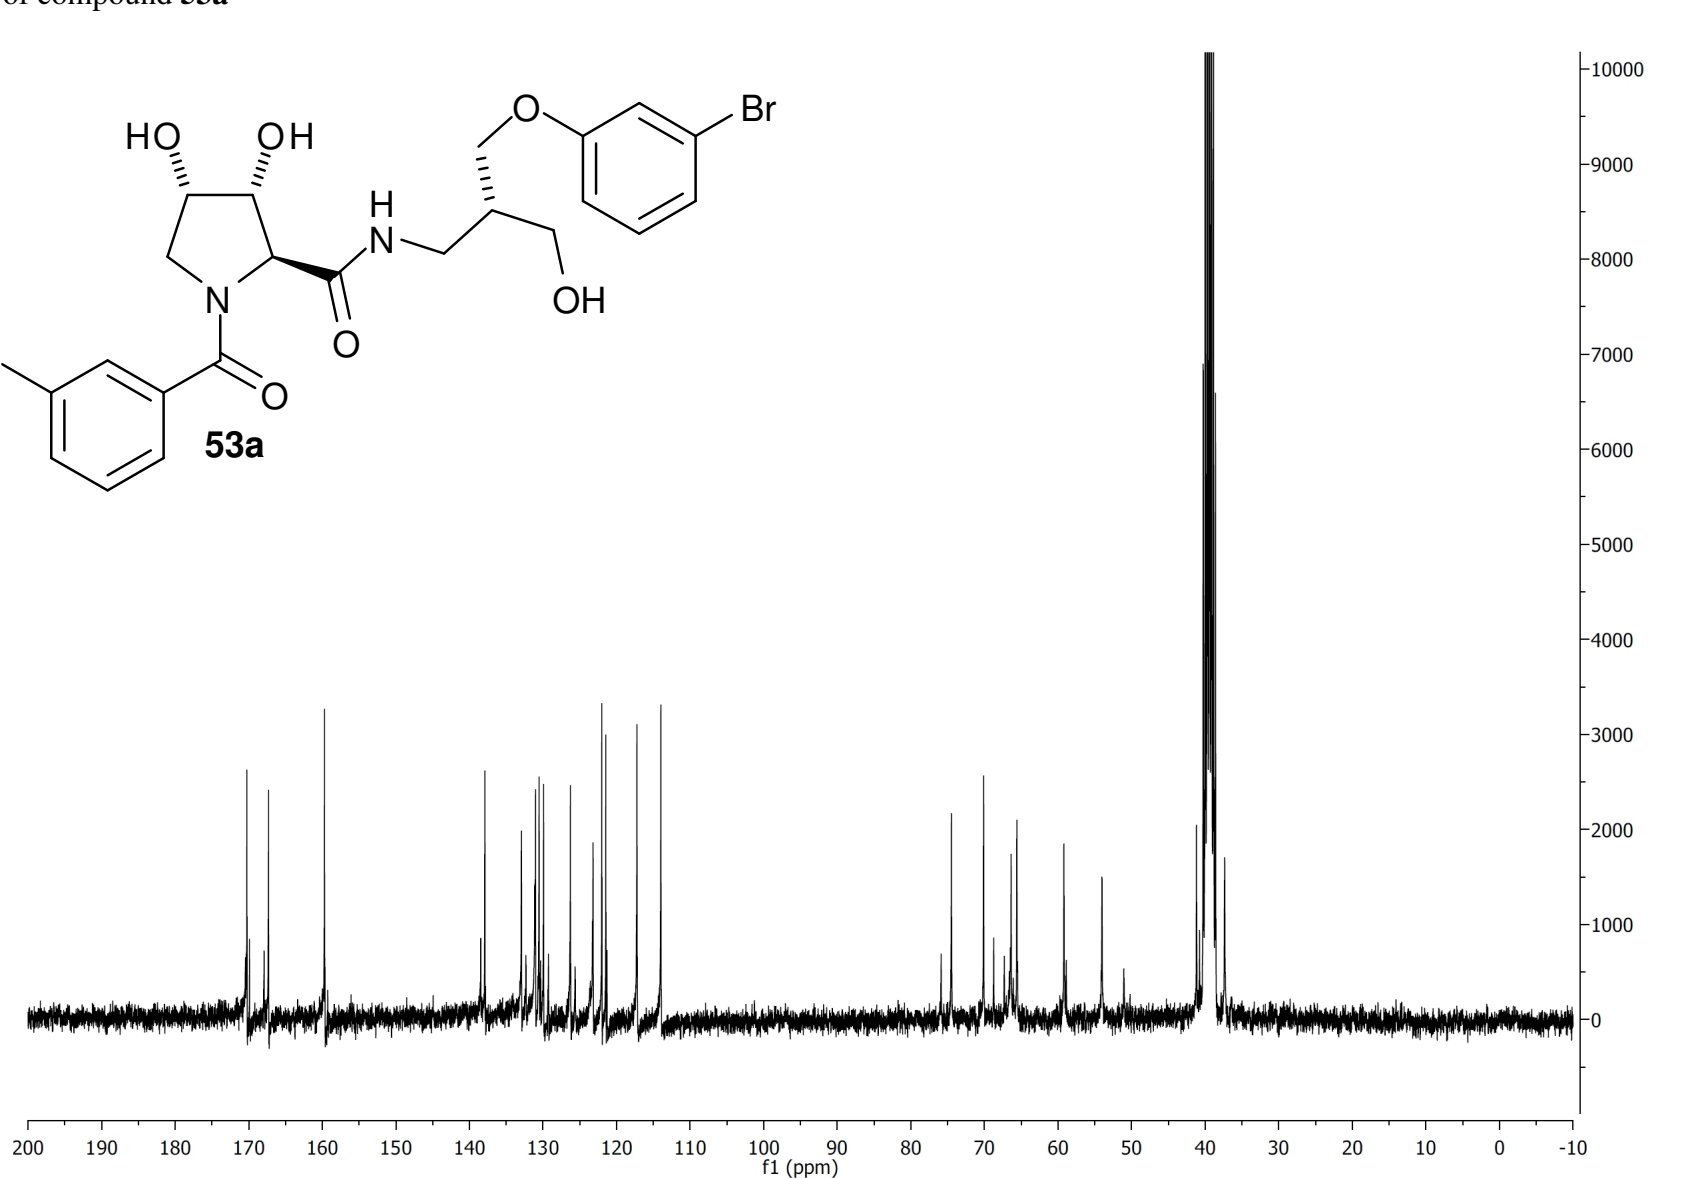

$^1\text{H}$  NMR of compound **54a**

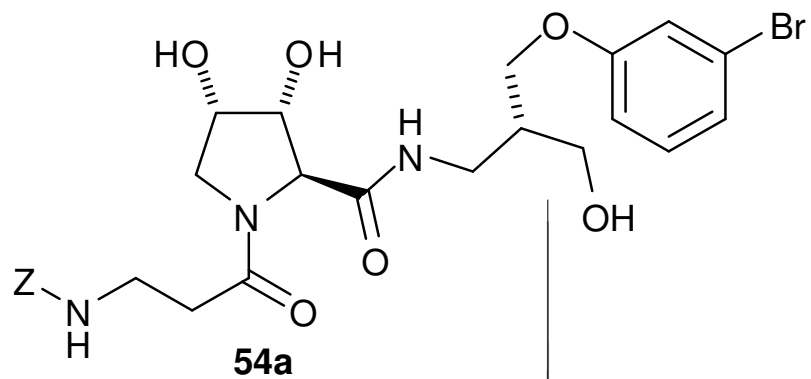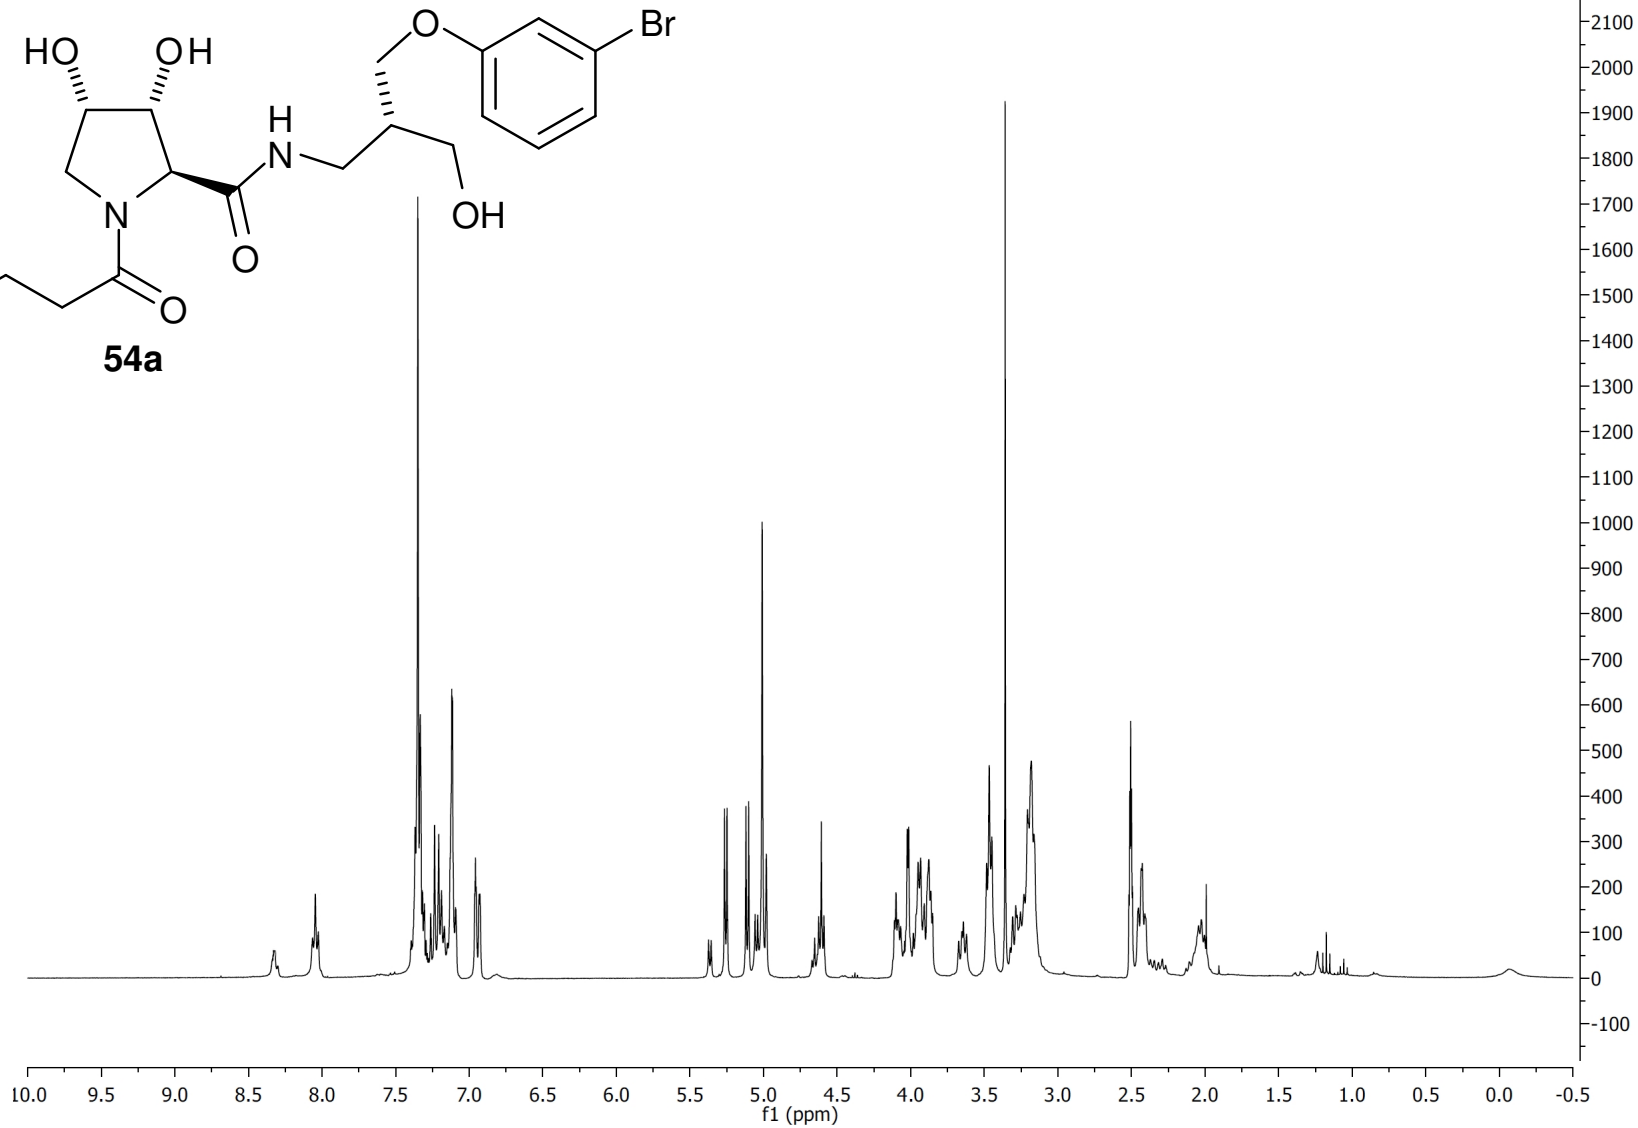



$^{13}\text{C}$  NMR of compound **54a**

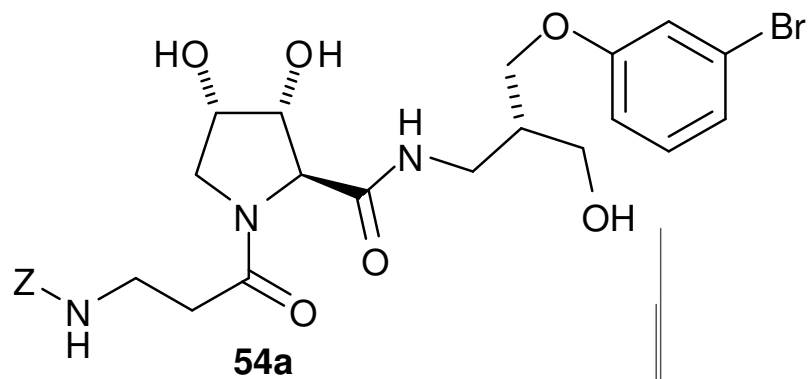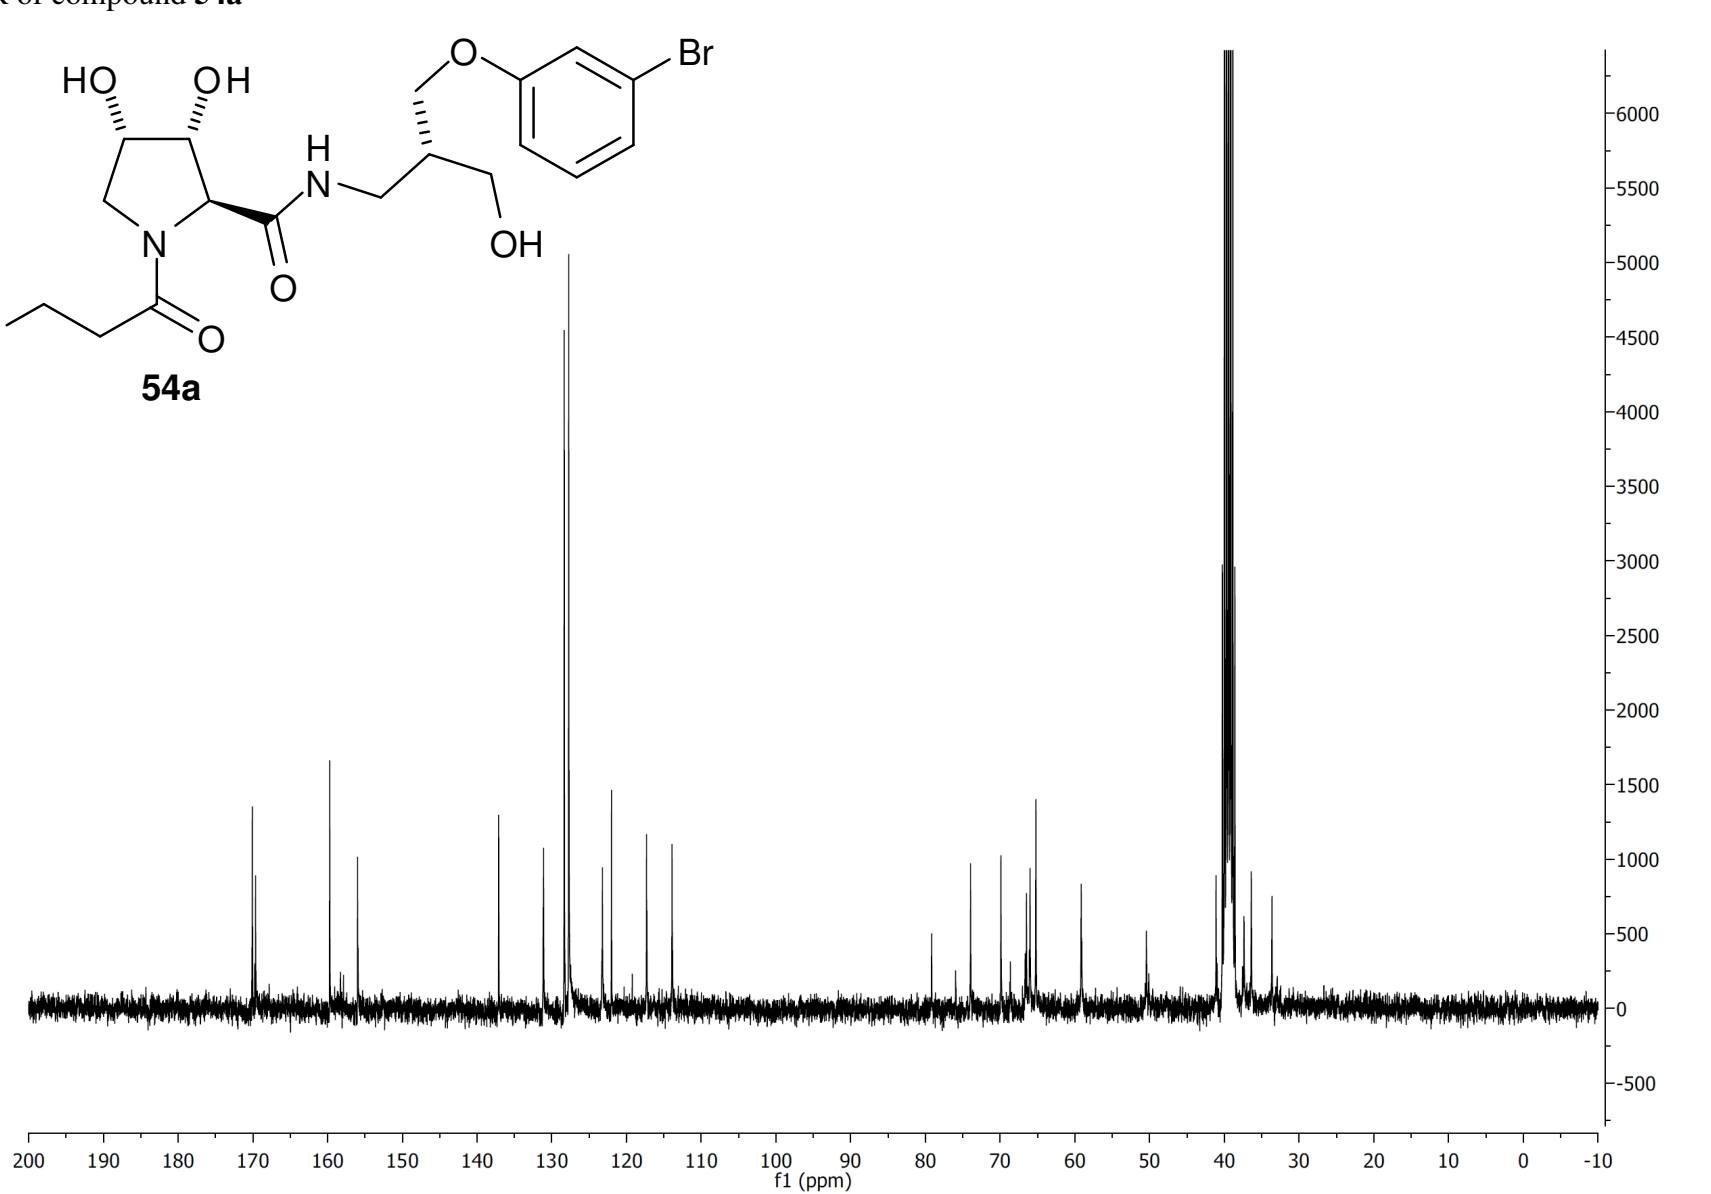

<sup>1</sup>H NMR of compound **55a**

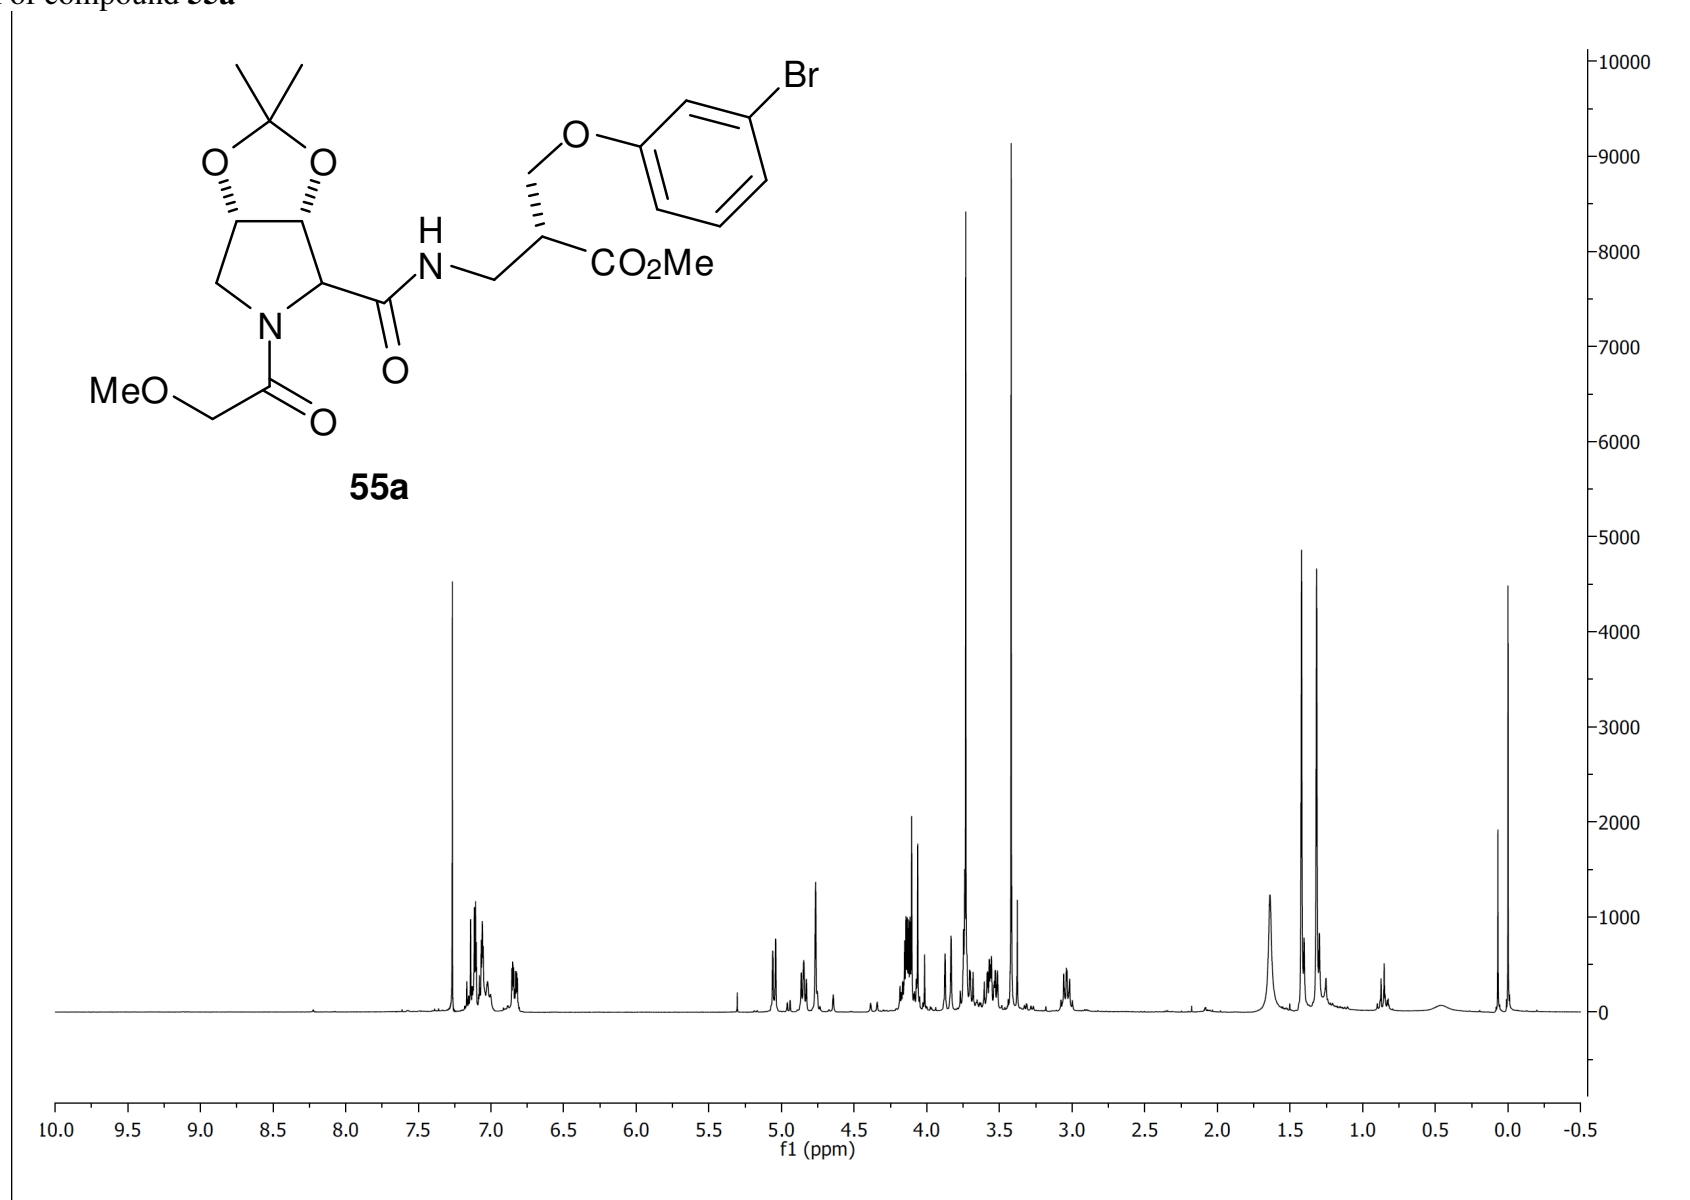

$^{13}\text{C}$  NMR of compound **55a**

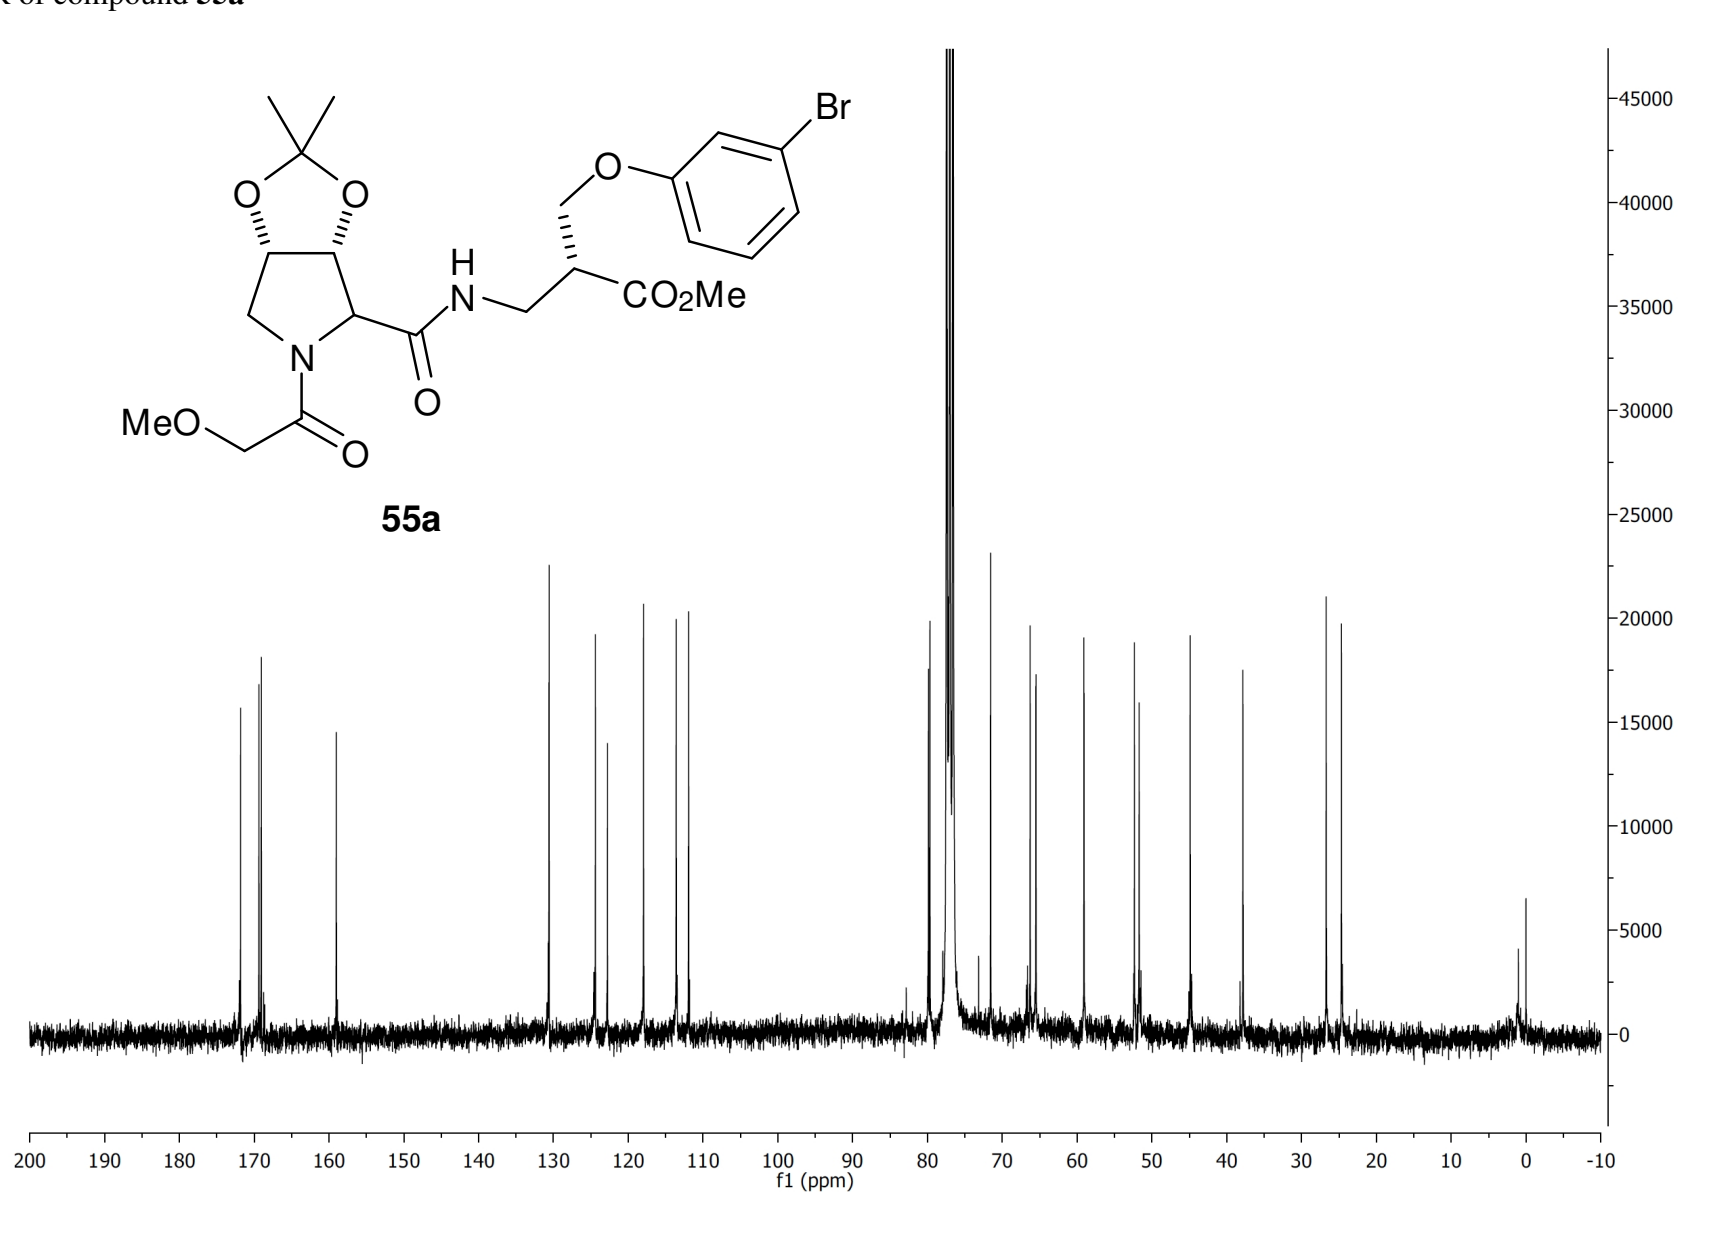

Supplement: c1ob06632c_2.pdf [file c1ob06632c_2.pdf]
